# Supplementary material for: Synthesis of chemically diverse esters of 5-aminolevulinic acid for photodynamic therapy via the multicomponent Passerini reaction
Source: Royal Society of Chemistry journal article supplement (doi:10.1039/c6ra15832c), 2016-01-01
Supplement: c6ra15832c1.pdf [file c6ra15832c1.pdf]

## SUPPLEMENTARY MATERIAL

### Synthesis of chemically diverse esters of 5-aminolevulinic acid for photodynamic therapy via the multicomponent Passerini reaction.

Gabriel F. Gola<sup>a</sup>, Gabriela Di Venosa<sup>b</sup>, Daniel A. Sáenz<sup>b</sup>, Gustavo H. Calvo<sup>b</sup>, Gabriela M. Cabrera<sup>a</sup>, Adriana G. Casas<sup>b</sup>, Javier A. Ramírez<sup>a\*</sup>.

<sup>a</sup> UMYMFOR - Departamento de Química Orgánica y CONICET, Facultad de Ciencias Exactas y Naturales, Universidad de Buenos Aires, Ciudad Universitaria, Ciudad de Buenos Aires, C1428EGA, Argentina.

<sup>b</sup> Centro de Investigaciones sobre Porfirinas y Porfirias (CIPYP). CONICET and Hospital de Clínicas José de San Martín, Universidad de Buenos Aires. Córdoba 2351, 1er subsuelo, CP1120AAF, Buenos Aires, Argentina

\*Corresponding author: Tel +54 01145763346, Fax +54 01145763385,  
e-mail: jar@qo.fcen.uba.ar

#### **Contents:**

|                                                    |     |
|----------------------------------------------------|-----|
| Synthetic procedures.                              | S2  |
| Estimated logD for CBz-protected esters of ALA.    | S9  |
| PDT curves for compounds <b>1f</b> and <b>1g</b> . | S10 |
| NMR and MS spectra of new compounds.               | S11 |

### **Synthetic procedures.**

#### ***N*-(benzyloxycarbonyl)-5-aminolevulinic acid (**2**)**

5-Aminolevulinic acid (499 mg, 2.98 mmol) was dissolved in 2.5 mL of methanol and cooled in an ice bath. 0.45 mL of benzyloxycarbonyl chloride (Z-Cl) was added, followed by a solution of 0.83 mL of triethylamine in 0.5 mL of methanol, which was added dropwise. After completion of the addition, the reaction mixture was stirred at room temperature for 2 h. The solution was poured into 15 mL of 5% hydrochloric acid. A white precipitate was formed, which was dissolved by adding 40 mL of ethyl acetate. The organic layer was separated, washed with brine (20 mL), water (2 x 20 mL) and finally dried. After evaporation under reduced pressure a crude product was obtained, which was crystallized from ethyl acetate-hexane to yield 67 % of **2** (532 mg).

#### **General procedure for the P-3CR.**

To a solution of *N*-(benzyloxycarbonyl)-5-aminolevulinic acid (**2**) in CH<sub>2</sub>Cl<sub>2</sub> (0.4 mL / 0.1 mmol of **2**) 1.1 equivalents of formaldehyde (37% aq.) were added, followed by the addition of 1.1 equivalents of the corresponding isocyanide. The mixture was stirred vigorously at room temperature until total disappearance of the acid was observed TLC (usually 24 h). Then, the mixture was concentrated and the residue was purified by silica gel column chromatography, as indicated in each case.

#### ***2*-(2-ethoxy-2-oxoethylamino)-2-oxoethyl-*N*-(benzyloxycarbonyl)-5-aminolevulinate (**3a**)**

Compound **3a** was obtained from 42 mg of **2** (0.16 mmol) and ethyl 2-isocyanoacetate. The crude was purified by column chromatography (98:2 CH<sub>2</sub>Cl<sub>2</sub>-MeOH) to give **3a** (56 mg; 86%) as a colorless syrup; R<sub>f</sub> 0.43 (95:5 CH<sub>2</sub>Cl<sub>2</sub>-MeOH); <sup>1</sup>H-NMR (CDCl<sub>3</sub>): 7.60-7.49 (m, 5H, Ar), 7.03 (b.s, 1H), 5.82 (b.s, 1H), 5.31 (s, 2H), 4.84 (s, 2H), 4.41-4.38 (m, 4H), 4.27 (d, *J* 5.3 Hz, 2H), 3.04 (t, *J* 6.1 Hz, 2H), 2.93 (t, *J* 6.1 Hz, 2H), 1.44 (t, *J* 7.1 Hz, 3H). <sup>13</sup>C-NMR (CDCl<sub>3</sub>) 209.6, 171.0, 169.4, 167.2, 128.5, 128.2, 128.1, 67.1, 62.8, 61.7, 50.5, 40.8, 34.5, 27.6, 14.0. HRMS (ESI) calcd for (M+Na) C<sub>19</sub>H<sub>24</sub>N<sub>2</sub>NaO<sub>8</sub>: 431.1425. Found: 431.1427.

#### ***2*-(diethoxyphosphorylmethylamino)-2-oxoethyl-*N*-(benzyloxycarbonyl)-5-aminolevulinate (**3b**)**

Compound **3b** was obtained from 84 mg of **2** (0.32 mmol) and diethyl (isocyanomethyl)phosphonate. The crude was purified by column chromatography (98:2 CH<sub>2</sub>Cl<sub>2</sub>-MeOH) to give **3b** (120 mg; 80%) as a colorless syrup; R<sub>f</sub> 0.26 (95:5 CH<sub>2</sub>Cl<sub>2</sub>-MeOH); <sup>1</sup>H-NMR (CDCl<sub>3</sub>) 7.38-7.28 (m, 5H, Ar), 6.84 (b.s, 1H, (CO)-NH-CH<sub>2</sub>-P), 6.49 (b.s, 1H, O(CO)-NH-CH<sub>2</sub>), 5.11

(s, 2H, ArCH<sub>2</sub>-O), 4.64 (s, 2H, O-CH<sub>2</sub>-(CO)), 4.17 (d, *J* 5.3 Hz, 2H, NH-CH<sub>2</sub>-(CO)), 4.08 (p, *J* 7.4 Hz, 4H, PO-CH<sub>2</sub>CH<sub>3</sub>), 3.73 (dd, *J* 6.1, 12.1 Hz, 2H, NH-CH<sub>2</sub>-P), 2.87 (t, *J* 6.1 Hz, 2H, (CO)-CH<sub>2</sub>-CH<sub>2</sub>-(CO)-O), 2.69 (t, *J* 6.1 Hz, 2H, (CO)-CH<sub>2</sub>-CH<sub>2</sub>-(CO)-O), 1.27 (t, *J* 7.1 Hz, 6H, PO-CH<sub>2</sub>CH<sub>3</sub>). <sup>13</sup>C-NMR (CDCl<sub>3</sub>): 205.8 (C=O ketone), 171.1 (C=O)-O), 167.0 (C=O)-NH), 156.7 (O-(C=O)-NH); 136.4, 128.4, 128.1, 128.0 (Ar); 66.9 (Ar-CH<sub>2</sub>-O); 62.81, 62.75, 62.74 (PO-CH<sub>2</sub>CH<sub>3</sub>; O-CH<sub>2</sub>-(CO)); 50.5 (NH-CH<sub>2</sub>-(CO)); 35.1, 33.8 (NH-CH<sub>2</sub>-P); 34.8((CO)-CH<sub>2</sub>-CH<sub>2</sub>-(CO)-O), 27.7((CO)-CH<sub>2</sub>-CH<sub>2</sub>-(CO)-O); 16.33, 16.29 (PO-CH<sub>2</sub>CH<sub>3</sub>). HRMS (ESI) calcd for (M+H) C<sub>20</sub>H<sub>30</sub>N<sub>2</sub>O<sub>9</sub>P: 473.1683. Found: 473.1661.

### **2-(3,4-dimethoxyphenethylamino)-2-oxoethyl-N-(benzyloxycarbonyl)-5-aminolevulinate (3c)**

Compound **3c** was obtained from 40 mg of **2** (0.15 mmol) and 4-(2-isocyanoethyl)-1,2-dimethoxybenzene. The crude was purified by column chromatography (98:2 CH<sub>2</sub>Cl<sub>2</sub>-MeOH) to give **3c** (59 mg; 81%) as a colorless syrup; R<sub>f</sub> 0.30 (95:5 CH<sub>2</sub>Cl<sub>2</sub>-MeOH); <sup>1</sup>H-NMR (CDCl<sub>3</sub>): 7.38-7.29 (m, 5H, Ar), 6.78 (d, *J* 7.9 Hz, 1H, Ph(OMe)<sub>2</sub>), 6.72 (m, 2H, Ph(OMe)<sub>2</sub>), 6.47 (b.s, 1H, (CO)-NH-CH<sub>2</sub>CH<sub>2</sub>), 5.40 (b.s, 1H, O-(CO)-NH-CH<sub>2</sub>), 5.10 (s, 2H, Ar-CH<sub>2</sub>-O), 4.58 (s, 2H, O-CH<sub>2</sub>-(CO)), 4.08 (d, *J* 5.4 Hz, 2H, NH-CH<sub>2</sub>-(CO)), 3.85, 3.83 (2s, 6H, Ar-OCH<sub>3</sub>), 3.53 (q, *J* 6.8 Hz, 2H, NH-CH<sub>2</sub>-CH<sub>2</sub>-Ar), 2.79 (m, 4H, NH-CH<sub>2</sub>-CH<sub>2</sub>-Ar, (CO)-CH<sub>2</sub>-CH<sub>2</sub>-(CO)-O), 2.60 (t, *J* 6.1 Hz, 2H, (CO)-CH<sub>2</sub>-CH<sub>2</sub>-(CO)-O). <sup>13</sup>C-NMR (CDCl<sub>3</sub>): 204.6 (C=O ketone), 171.2 ((C=O)-O), 166.9 ((C=O)-NH), 156.2 (O-(C=O)-NH); 148.9, 147.6, 136.1, 131.3, 128.5, 128.2, 128.1, 120.7, 112.1, 111.3 (Ar), 67.1 (Ar-CH<sub>2</sub>-O), 63.0 (O-CH<sub>2</sub>-(CO)); 55.89, 55.85 (Ar-OCH<sub>3</sub>); 50.3 (NH-CH<sub>2</sub>-(CO)), 40.6 (NH-CH<sub>2</sub>-CH<sub>2</sub>-Ar); 35.0, 34.5 ((CO)-CH<sub>2</sub>-CH<sub>2</sub>-(CO)-O; NH-CH<sub>2</sub>-CH<sub>2</sub>-Ar); 27.5 ((CO)-CH<sub>2</sub>-CH<sub>2</sub>-(CO)-O). HRMS (ESI) calcd for (M+H) C<sub>25</sub>H<sub>31</sub>N<sub>2</sub>O<sub>8</sub>: 487.2075. Found: 487.2095.

### **2-(t-butylamino)-2-oxoethyl-N-(benzyloxycarbonyl)-5-aminolevulinate (3d)**

Compound **3d** was obtained from 47 mg of **2** (0.18 mmol) and 2-isocyano-2-methylpropane. The crude was purified by column chromatography (100:1 CH<sub>2</sub>Cl<sub>2</sub>-MeOH) to give **3d** (61 mg; 91%) as a colorless syrup; R<sub>f</sub> 0.43 (95:5 CH<sub>2</sub>Cl<sub>2</sub>-MeOH); <sup>1</sup>H-NMR (CDCl<sub>3</sub>): 7.35 (m, 5H), 6.03 (b.s, 1H), 5.41 (b.s, 1H), 5.12 (s, 2H), 4.47 (s, 2H), 4.14 (d, *J* 5.2 Hz, 2H), 2.82 (t, *J* 6.1 Hz, 2H), 2.69 (t, *J* 6.1 Hz, 2H), 1.38 (s, 9H). <sup>13</sup>C-NMR (CDCl<sub>3</sub>): 204.4, 171.3, 166.1, 156.3, 136.3, 128.7, 128.4, 128.2, 110.1, 67.2, 63.5, 51.6, 50.6, 34.6, 28.8. HRMS (ESI) calcd for (M+Na) C<sub>19</sub>H<sub>26</sub>N<sub>2</sub>O<sub>6</sub>Na: 401.1683. Found: 401.1667.

### **2-(cyclohexylamino)-2-oxoethyl-N-(benzyloxycarbonyl)-5-aminolevulinate (3e)**

Compound **3e** was obtained from 29 mg of **2** (0.11 mmol) and isocyanocyclohexane. The crude was purified by column chromatography (98:2 CH<sub>2</sub>Cl<sub>2</sub>-MeOH) to give **3e** (35 mg; 80%) as a colorless syrup; R<sub>f</sub> 0.39 (95:5 CH<sub>2</sub>Cl<sub>2</sub>-MeOH); <sup>1</sup>H-NMR (CDCl<sub>3</sub>): 7.30-7.39 (m, 5H, Ar), 6.23 (d, *J* 7.1

Hz, 1H), 5.38 (b.s, 1H), 5.12 (s, 2H), 4.56 (s, 2H), 4.15 (d, *J* 5.3 Hz, 2H), 3.81 (m, 1H), 2.84 (t, *J* 6.0 Hz, 2H), 2.69 (t, *J* 6.2 Hz, 2H), 1.92 (m, 2H), 1.76-1.57 (m, 4H), 1.36 (m, 2H), 1.26-1.12 (m, 2H). <sup>13</sup>C-NMR (CDCl<sub>3</sub>): 203.9, 171.2, 165.3, 128.5, 128.0, 67.2, 63.1, 50.4, 48.1, 34.6, 32.9, 27.6, 25.5, 24.9. HRMS (ESI) calcd for (M+H) C<sub>21</sub>H<sub>29</sub>N<sub>2</sub>O<sub>6</sub>: 405.2020. Found: 405.2029.

**2-((4-fluorophenyl)amino)-2-oxoethyl-N-(benzyloxycarbonyl)-5-aminolevulinate (3f)**

Compound **3f** was obtained from 60 mg of **2** (0.23 mmol) and 1-fluoro-4-isocyanobenzene. The crude was purified by column chromatography (70:0.4 and 50:0.4 CH<sub>2</sub>Cl<sub>2</sub>-MeOH) to give **3f** (70 mg; 75%) as a colorless syrup; R<sub>f</sub> 0.50 (95:5 CH<sub>2</sub>Cl<sub>2</sub>-MeOH); <sup>1</sup>H-NMR (CDCl<sub>3</sub>): 8.27 (b.s, 1H), 7.65 (dd, *J* 8.9, 4.8 Hz, 2H), 7.33 (m, 5H), 6.96 (t, *J* 8.5 Hz, 2H), 5.37 (b.s, 1H), 5.08 (s, 2H), 4.72 (s, 2H), 4.13 (d, *J* 5.4 Hz, 2H), 2.90 (t, *J* 6.0 Hz, 2H), 2.71 (t, *J* 6.0 Hz, 2H). <sup>13</sup>C-NMR (CDCl<sub>3</sub>): 206.1, 171.5, 165.4, 160.6, 158.7, 156.4, 136.1, 133.4, 133.3, 128.7, 128.5, 128.2, 122.1, 122.0, 115.8, 115.6, 67.4, 63.1, 50.4, 35.0, 27.9. HRMS (ESI) calcd for (M+H) C<sub>21</sub>H<sub>21</sub>FN<sub>2</sub>O<sub>6</sub>Na: 439.1276. Found: 439.1281.

**2-(4-tolylamino)-2-oxoethyl-N-(benzyloxycarbonyl)-5-aminolevulinate (3g)**

Compound **3g** was obtained from 63 mg of **2** (0.24 mmol) and 1-isocyano-4-methylbenzene. The crude was purified by column chromatography (100:1 CH<sub>2</sub>Cl<sub>2</sub>-MeOH) to give **3g** (79 mg; 81%) as a colorless syrup; R<sub>f</sub> 0.45 (95:5 CH<sub>2</sub>Cl<sub>2</sub>-MeOH); <sup>1</sup>H-NMR (CDCl<sub>3</sub>): 8.16 (b.s, 1H, (CO)-NH-Ar), 7.54 (d, *J* 8.0 Hz, 2H, Ar(*m*-H)-CH<sub>3</sub>), 7.33 (m, 5H, Ar), 7.08 (d, *J* 8.0 Hz, 2H, Ar(*o*-H)-CH<sub>3</sub>), 5.41 (b.s, 1H, (CO)-NH-CH<sub>2</sub>), 5.08 (s, 2H, Ar-CH<sub>2</sub>-O), 4.70 (s, 2H, O-CH<sub>2</sub>-(CO)), 4.12 (d, *J* 5.3 Hz, 2H, NH-CH<sub>2</sub>-(CO)), 2.86 (t, *J* 6.0 Hz, 2H, (CO)-CH<sub>2</sub>-CH<sub>2</sub>-(CO)-O), 2.71 (t, *J* 6.0 Hz, 2H, (CO)-CH<sub>2</sub>-CH<sub>2</sub>-(CO)-O), 2.27 (s, 2H, Ar-CH<sub>3</sub>). <sup>13</sup>C-NMR (CDCl<sub>3</sub>): 205.6 (C=O ketone), 171.5 ((C=O)-O), 165.2 ((C=O)-NH), 156.4 (O-(C=O)-NH); 136.2, 134.7, 134.5, 129.6, 128.7, 128.4, 128.2, 120.3 (Ar); 67.3 (Ar-CH<sub>2</sub>-O), 63.2 (O-CH<sub>2</sub>-(CO)), 50.5 (NH-CH<sub>2</sub>-(CO)), 34.9 ((CO)-CH<sub>2</sub>-CH<sub>2</sub>-(CO)-O), 27.9 ((CO)-CH<sub>2</sub>-CH<sub>2</sub>-(CO)-O), 21.0 (Ar-CH<sub>3</sub>). HRMS (ESI) calcd for (M+H) C<sub>22</sub>H<sub>25</sub>N<sub>2</sub>O<sub>6</sub>: 413.1707. Found: 413.17071.

**2-((2-(trifluoromethyl)phenyl)amino)-2-oxoethyl-N-(benzyloxycarbonyl)-5-aminolevulinate (3h)**

Compound **3h** was obtained from 60 mg of **2** (0.23 mmol) and 1-isocyano-2-(trifluoromethyl)benzene. The crude was purified by column chromatography (100:1 CH<sub>2</sub>Cl<sub>2</sub>-MeOH) to give **3h** (89 mg; 84%) as a colorless syrup; R<sub>f</sub> 0.50 (95:5 CH<sub>2</sub>Cl<sub>2</sub>-MeOH); <sup>1</sup>H-NMR (CDCl<sub>3</sub>): 8.36 (b.s, 1H), 8.24 (d, *J* 8.3 Hz, 1H), 7.63 (d, *J* 7.8 Hz, 1H), 7.57 (t, *J* 7.8 Hz, 1H), 7.34 (m, 5H), 7.27 (t, *J* 7.8 Hz, 1H), 5.47 (b.s, 1H), 5.10 (s, 2H), 4.74 (s, 2H), 4.14 (d, *J* 5.1 Hz, 2H), 2.80 (m, 4H). <sup>13</sup>C-NMR (CDCl<sub>3</sub>): 203.7, 170.9, 165.4, 156.3, 136.3, 134.3, 133.2, 128.6, 128.3, 128.2,

126.40, 126.35, 126.31, 126.27, 125.22, 125.15, 124.2, 123.1, 67.2, 63.3, 50.6, 34.3, 27.5. HRMS (ESI) calcd for (M+H) C<sub>22</sub>H<sub>22</sub>F<sub>3</sub>N<sub>2</sub>O<sub>6</sub>: 467.1425. Found: 467.1420.

**2-((4-bromo-2-methylphenyl)amino)-2-oxoethyl-N-(benzyloxycarbonyl)-5-aminolevulinate (3i)**

Compound **3i** was obtained from 61 mg of **2** (0.23 mmol) and 4-bromo-1-isocyano-2-methylbenzene. The crude was purified by column chromatography (70:0.4 and 50 : 0.4 CH<sub>2</sub>Cl<sub>2</sub>-MeOH) to give **3i** (94 mg; 84%) as a colorless syrup; R<sub>f</sub> 0.45 (95:5 CH<sub>2</sub>Cl<sub>2</sub>-MeOH); <sup>1</sup>H-NMR (CDCl<sub>3</sub>): 7.92 (b.s, 1 H, (CO)-NH-Ar), 7.61 (d, *J* 8.4 Hz, 1H, Ar), 7.40-7.28 (m, 7H, Ar), 5.37 (b.s, 1H, (CO)-NH-CH<sub>2</sub>), 5.07 (s, 2H, Ar-CH<sub>2</sub>-O), 4.73 (s, 2H, O-CH<sub>2</sub>-(CO)), 4.10 (d, *J* 5.2 Hz, 2H, O-CH<sub>2</sub>-(CO)), 2.85 (t, *J* 5.9 Hz, 2H, (CO)-CH<sub>2</sub>-CH<sub>2</sub>-(CO)-O), 2.73 (t, *J* 5.9 Hz, 2H, (CO)-CH<sub>2</sub>-CH<sub>2</sub>-(CO)-O), 2.23 (s, 3H, Ar-CH<sub>3</sub>). <sup>13</sup>C-NMR (CDCl<sub>3</sub>): 204.8 (C=O ketone), 171.4 ((C=O)-O), 165.4 ((C=O)-NH), 156.3 (O-(C=O)-NH); 136.2, 133.8, 133.4, 132.6, 129.8, 128.7, 128.4, 128.2, 125.3, 119.0 (Ar); 67.3 (Ar-CH<sub>2</sub>-O), 63.5 (O-CH<sub>2</sub>-(CO)), 50.5 (NH-CH<sub>2</sub>-(CO)), 34.6 ((CO)-CH<sub>2</sub>-CH<sub>2</sub>-(CO)-O), 27.8 ((CO)-CH<sub>2</sub>-CH<sub>2</sub>-(CO)-O), 17.5 (Ar-CH<sub>3</sub>). HRMS (ESI) calcd for (M+Na) C<sub>22</sub>H<sub>23</sub>BrN<sub>2</sub>O<sub>6</sub>Na: 513.0632. Found: 513.0647.

**2-oxo-2-(pentadecylamino)ethyl-N-(benzyloxycarbonyl)-5-aminolevulinate (3j)**

Compound **3j** was obtained from 39 mg of **2** (0.15 mmol) and 1-isocyanopentadecane. The crude was purified by column chromatography (98:2 CH<sub>2</sub>Cl<sub>2</sub>-MeOH) to give **3j** (50 mg; 63%) as a colorless syrup; R<sub>f</sub> 0.43 (95:5 CH<sub>2</sub>Cl<sub>2</sub>-MeOH); <sup>1</sup>H-NMR (CDCl<sub>3</sub>): 7.40-7.29 (m, 5H, Ar), 6.38 (b.s, 1H), 5.40 (b.s, 1H), 5.12 (s, 2H), 4.58 (s, 2H), 4.14 (d, *J* 4.6 Hz, 2H), 3.29 (q, *J* 6.8 Hz, 2H), 2.83 (t, *J* 5.6 Hz, 2H), 2.69 (t, *J* 5.6 Hz, 2H), 1.73-1.20 (m, 26H), 0.88 (t, *J* 6.8 Hz, 3H). <sup>13</sup>C-NMR (CDCl<sub>3</sub>): 204.5, 171.2, 166.8, 128.3, 128.1, 67.2, 63.1, 50.4, 39.3, 34.6, 31.9, 29.70, 29.66, 29.61, 29.57, 29.42, 29.37, 29.29, 27.6, 26.9, 22.7, 14.1. HRMS (ESI) calcd for (M+H) C<sub>30</sub>H<sub>49</sub>N<sub>2</sub>O<sub>6</sub>: 533.3585. Found: 533.3585.

**General procedure for the deprotection of the Passerini products.**

A stirred suspension of the corresponding intermediates **3a-j**, dissolved in 10:1 MeOH-CHCl<sub>3</sub> (3 mL / 0.1 mmol of substrate) and palladium black (0.1 equivalents) was hydrogenated at atmospheric pressure at room temperature. After completion of the reaction (usually for 4 h, controlled by TLC), the mixture was filtered through celite and the solvent was removed *in vacuo*. The crude product was purified by recrystallization or silica gel column chromatography, as indicated in each case.

### ***2-(2-ethoxy-2-oxoethylamino)-2-oxoethyl-5-aminolevulinate (1a)***

Compound **1a** was obtained from 40 mg (0.098 mmol) of **3a**. The crude product was purified by recrystallization from CH<sub>2</sub>Cl<sub>2</sub> to yield 24 mg of **1a** (90%) as a white solid. R<sub>f</sub> 0.08 (93:7 CH<sub>2</sub>Cl<sub>2</sub>-MeOH); <sup>1</sup>H-NMR (CDCl<sub>3</sub>, CD<sub>3</sub>OD 9:1): 4.64 (s, 2H), 4.22 (q, J 7.1 Hz, 2H), 4.03 (d, J 6.5 Hz, 4H), 2.92 (b. dt, J 6.2, 2.0 Hz, 2H), 2.84 (b. dt, J 6.2, 2.0 Hz, 2H), 1.30 (t, J 7.1 Hz, 3H). <sup>13</sup>C-NMR (CDCl<sub>3</sub>, CD<sub>3</sub>OD 9:1): 201.4, 171.5, 169.7, 168.3, 62.4, 61.4, 47.0, 40.6, 34.2, 27.2, 13.7. HRMS (ESI) calcd for (M+Na) C<sub>11</sub>H<sub>18</sub>N<sub>2</sub>NaO<sub>6</sub>: 297.1057. Found: 297.1048.

### ***2-(diethoxyphosphorylmethylamino)-2-oxoethyl-5-aminolevulinate (1b)***

Compound **1b** was obtained from 43 mg (0.092 mmol) of **3b**. The crude product was purified by column chromatography (98:2 and 95:5 CH<sub>2</sub>Cl<sub>2</sub>-MeOH) to yield 28 mg of **1b** (89%) as a colorless syrup. R<sub>f</sub> 0.32 (8:2 CH<sub>2</sub>Cl<sub>2</sub>-MeOH); <sup>1</sup>H-NMR (CDCl<sub>3</sub>): 8.23 (bs, 2H), 4.69 (s, 2H), 4.28 (bs, 2H), 4.15 (m, 4H), 3.85 (bs, 2H), 3.47 (bs, 1H), 3.03 (bs, 2H), 2.85 (bs, 2H), 1.31 (t, J 7.1 Hz, 6H). <sup>13</sup>C-NMR (CDCl<sub>3</sub>): 203.5, 172.6, 168.5, 63.8, 63.7, 63.2, 63.0, 62.95, 62.9, 48.2, 35.3, 35.0, 34.0, 33.8, 32.5, 29.3, 27.8, 16.5. HRMS (ESI) calcd for (M+Na) C<sub>12</sub>H<sub>23</sub>N<sub>2</sub>NaO<sub>7</sub>P: 361.1135. Found: 361.1154.

### ***2-(3,4-dimethoxyphenethylamino)-2-oxoethyl-5-aminolevulinate (1c)***

Compound **1c** was obtained from 49 mg (0.101 mmol) of **3c**. The crude product was purified by recrystallization from CH<sub>2</sub>Cl<sub>2</sub> to yield 22 mg of **1c** (63%) as white solid. R<sub>f</sub> 0.09 (93:7 CH<sub>2</sub>Cl<sub>2</sub>-MeOH); <sup>1</sup>H-NMR (CDCl<sub>3</sub>, CD<sub>3</sub>OD 9:1): 6.84 (d, J 8.7 Hz, 1H, Ar), 6.77 (m, 2H, Ar), 4.54 (s, 2H, O-CH<sub>2</sub>-(CO)), 4.02 (s, 2H, NH<sub>2</sub>-CH<sub>2</sub>-(CO)), 3.88 (s, 3H, Ar-OCH<sub>3</sub>), 3.86 (s, 3H, Ar-OCH<sub>3</sub>), 3.48 (t, J 7.4 Hz, 2H, NH-CH<sub>2</sub>-CH<sub>2</sub>-Ar), 2.87 (t, J 6.3 Hz, 2H, (CO)-CH<sub>2</sub>-CH<sub>2</sub>-(CO)O), 2.80 (t, J 7.4 Hz, 2H, NH-CH<sub>2</sub>-CH<sub>2</sub>-Ar), 2.77 (t, J 6.3 Hz, 2H, (CO)-CH<sub>2</sub>-CH<sub>2</sub>-(CO)O). <sup>13</sup>C-RMN (CDCl<sub>3</sub>, CD<sub>3</sub>OD 9:1): 201.2 (C=O ketone), 171.4 ((C=O)-O), 167.4 ((C=O)-NH); 148.6, 147.3, 131.2, 120.5, 111.9, 111.2 (Ar); 62.6 (O-CH<sub>2</sub>-(CO)); 55.6, 55.6 (Ar-OCH<sub>3</sub>); 46.9 (NH<sub>2</sub>-CH<sub>2</sub>-(CO)), 40.5 (NH-CH<sub>2</sub>-CH<sub>2</sub>-Ar), 34.7 ((CO)-CH<sub>2</sub>-CH<sub>2</sub>-(CO)-O), 34.1 (NH-CH<sub>2</sub>-CH<sub>2</sub>-Ar), 27.1 ((CO)-CH<sub>2</sub>-CH<sub>2</sub>-(CO)-O). HRMS (ESI) calcd for (M+Na) C<sub>17</sub>H<sub>24</sub>N<sub>2</sub>NaO<sub>6</sub>: 375.1527. Found: 375.1510.

### ***2-(t-butylamino)-2-oxoethyl-5-aminolevulinate (1d)***

Compound **1d** was obtained from 41 mg (0.108 mmol) of **3d**. The crude product was purified by column chromatography (95:5 and 9:1 CH<sub>2</sub>Cl<sub>2</sub>-MeOH) to yield 24 mg of **1d** (89%) as a colorless syrup. R<sub>f</sub> 0.26 (8:2 CH<sub>2</sub>Cl<sub>2</sub>-MeOH); <sup>1</sup>H-NMR (CDCl<sub>3</sub>): 8.14 (b.s, 2H), 4.64 (b.s, 2H), 4.40 (b.s, 2H), 3.09 (b.s, 2H), 2.85(b.s, 2H), 1.43 (m, 12H). <sup>13</sup>C-NMR (CDCl<sub>3</sub>): 203.2, 172.5, 171.3, 167.1, 166.1, 63.7, 63.5, 51.8, 51.6, 50.7, 48.2, 35.0, 32.3, 29.3, 28.84, 28.79, 28.7, 27.6. HRMS (ESI) calcd for (M+Na) C<sub>11</sub>H<sub>20</sub>N<sub>2</sub>NaO<sub>4</sub>: 267.1315. Found: 267.1311.

### ***2-(cyclohexylamino)-2-oxoethyl-5-aminolevulinate (1e)***

Compound **1e** was obtained from 27 mg (0.067 mmol) of **3e**. The crude product was purified by recrystallization from CH<sub>2</sub>Cl<sub>2</sub> to yield 16 mg of **1e** (90%), as a white solid. Rf 0.39 (9 :5 CH<sub>2</sub>Cl<sub>2</sub>-MeOH); <sup>1</sup>H-NMR (CDCl<sub>3</sub>, CD<sub>3</sub>OD 9:1): 8.25 (b.s, 1H), 4.55 (s, 2H), 4.18 (s, 2H), 3.71 (m, 1H), 3.00-2.73 (m, 6H), 1.87 (m, 2H), 1.74 (m, 2H), 1.63 (m, 1H), 1.40-1.11 (m, 5H). <sup>13</sup>C-NMR (CDCl<sub>3</sub>, CD<sub>3</sub>OD 9:1): 202.5, 172.2, 166.7, 63.2, 48.6, 48.5, 47.7, 34.7, 32.71, 32.68, 27.5, 25.4, 25.0. HRMS (ESI) calcd for (M+Na) C<sub>13</sub>H<sub>22</sub>N<sub>2</sub>NaO<sub>4</sub>: 293.1472. Found: 293.1466.

### ***2-((4-fluorophenyl)amino)-2-oxoethyl-5-aminolevulinate (1f)***

Compound **1f** was obtained from 47 mg (0.113 mmol) of **3f**. The crude product was purified by recrystallization from CH<sub>2</sub>Cl<sub>2</sub> to yield 23 mg of **1f** (73%) as a white solid. Rf 0.20 (85:15 CH<sub>2</sub>Cl<sub>2</sub>-MeOH); <sup>1</sup>H-NMR (CDCl<sub>3</sub>, CD<sub>3</sub>OD 9:1): 7.56 (m, 2H), 7.03 (m, 2H), 4.72 (s, 2H), 4.01 (s, 2H), 2.89 (m, 4H). <sup>13</sup>C-NMR (CDCl<sub>3</sub>, CD<sub>3</sub>OD 9:1): 201.0, 171.7, 165.9, 160.2, 158.2, 133.2, 133.1, 121.8, 121.7, 115.0, 114.8, 62.3, 46.7, 33.9, 27.0. HRMS (ESI) calcd for (M+H) C<sub>13</sub>H<sub>16</sub>N<sub>2</sub>FO<sub>4</sub>: 283.1089. Found: 283.1098.

### ***2-(4-tolylamino)-2-oxoethyl-5-aminolevulinate (1g)***

Compound **1g** was obtained from 55 mg (0.133 mmol) of **3g**. The crude product was purified by recrystallization from CH<sub>2</sub>Cl<sub>2</sub> to yield 22 mg of **1g** (61%) as a white solid. Rf 0.20 (85:15 CH<sub>2</sub>Cl<sub>2</sub>-MeOH); <sup>1</sup>H-NMR (CDCl<sub>3</sub>, CD<sub>3</sub>OD 9:1): 7.44 (d, J 8.3 Hz, 2H, Ar), 7.13 (d, J 8.3 Hz, 2H, Ar), 4.71 (s, 2H, O-CH<sub>2</sub>-(CO)), 4.01 (s, 2H, NH<sub>2</sub>-CH<sub>2</sub>-(CO)), 2.88 (m, 4H, (CO)-CH<sub>2</sub>-CH<sub>2</sub>-(CO)-O, (CO)-CH<sub>2</sub>-CH<sub>2</sub>-(CO)-O), 2.32 (s, 2H, Ar-CH<sub>3</sub>). <sup>13</sup>C-NMR (CDCl<sub>3</sub>, CD<sub>3</sub>OD 9:1): 201.2 (C=O ketone), 171.7 ((C=O)-O), 165.9 ((C=O)-NH); 134.4, 134.1, 129.0, 120.2 (Ar); 62.5 (O-CH<sub>2</sub>-(CO)), 46.8 (NH<sub>2</sub>-CH<sub>2</sub>-(CO)), 34.0 ((CO)-CH<sub>2</sub>-CH<sub>2</sub>-(CO)-O), 27.2 ((CO)-CH<sub>2</sub>-CH<sub>2</sub>-(CO)-O), 20.2 (Ar-CH<sub>3</sub>). HRMS (ESI) calcd for (M+H) C<sub>14</sub>H<sub>19</sub>N<sub>2</sub>O<sub>4</sub>: 279.1339. Found: 279.1338.

### ***2-((2-(trifluoromethyl)phenyl)amino)-2-oxoethyl-5-aminolevulinate (1h)***

Compound **1h** was obtained from 48 mg (0.104 mmol) of **3h**. The crude product was purified by recrystallization from CH<sub>2</sub>Cl<sub>2</sub> to yield 29 mg of **1h** (85%) as a white solid. Rf 0.30 (85:15 CH<sub>2</sub>Cl<sub>2</sub>-MeOH); <sup>1</sup>H-NMR (CDCl<sub>3</sub>, CD<sub>3</sub>OD 9:1): 8.01 (d, J 8.2 Hz, 1H), 7.67 (d, J 7.9 Hz, 1H), 7.61 (t, J 7.9 Hz, 1H), 7.35 (t, J 7.7 Hz, 1H), 4.76 (s, 2H), 4.02 (s, 2H), 2.91 (m, 2H), 2.86 (m, 2H). <sup>13</sup>C-NMR (CDCl<sub>3</sub>, CD<sub>3</sub>OD 9:1): 201.0, 171.2, 166.1, 133.8, 132.9, 126.31, 126.26, 125.8, 125.7, 63.0, 47.1, 34.3, 27.2. HRMS (ESI) calcd for (M+Na) C<sub>14</sub>H<sub>15</sub>F<sub>3</sub>N<sub>2</sub>NaO<sub>4</sub>: 355.0876. Found: 355.0881.

### **2-oxo-2-(pentadecylamino)ethyl-5-aminolevulinate (1j)**

Compound **1j** was obtained from 35 mg (0.066 mmol) of **3j**. The crude product was purified by column chromatography (95:5 and 9:1 CH<sub>2</sub>Cl<sub>2</sub>-MeOH) to yield 14 mg of **1j** (33%), a pale yellow solid. Rf 0.14 (9:1 CH<sub>2</sub>Cl<sub>2</sub>-MeOH); <sup>1</sup>H-NMR (CDCl<sub>3</sub>): 4.55 (s, 2H), 4.03 (s, 2H), 3.24 (t, J 7.3 Hz, 2H), 2.89 (t, J 6.3 Hz, 2H), 2.80 (t, J 6.3 Hz, 2H), 1.53 (b.s, 2H), 1.34-1.22 (m, 24H), 0.88 (t, J 6.8 Hz, 3H). <sup>13</sup>C-NMR (CDCl<sub>3</sub>): 201.5, 171.6, 171.4, 167.4, 62.8, 47.1, 39.3, 34.4, 31.8, 29.58, 29.56, 29.54, 29.52, 29.50, 29.48, 29.45, 29.25, 29.22, 29.20, 27.4, 26.83, 26.79, 22.6, 13.9. HRMS (ESI) calcd for (M+H) C<sub>22</sub>H<sub>43</sub>N<sub>2</sub>O<sub>4</sub>: 399.3217. Found: 399.3197.

### **2-((4-bromo-2-methylphenyl)amino)-2-oxoethyl-5-aminolevulinate (1i)**

Unexpectedly, when the general procedure deprotection procedure was applied to 67 mg (0.136 mmol) of **3i**, the target compound **1i** was not obtained. After purification of the resulting product by recrystallization from CH<sub>2</sub>Cl<sub>2</sub>, 40 mg of a white solid was obtained, which was identified as **2-((2-methylphenyl)amino)-2-oxoethyl-5-aminolevulinate (1k)**. Rf 0.24 (85:15 CH<sub>2</sub>Cl<sub>2</sub>-MeOH); <sup>1</sup>H-NMR (CDCl<sub>3</sub>, CD<sub>3</sub>OD 9:1): 7.42 (dd, 1H, J 7.8; 1.4 Hz, Ar), 7.26-7.13 (m, 3H, Ar), 4.78 (s, 2H, O-CH<sub>2</sub>-(CO)), 4.02 (s, 2H, NH<sub>2</sub>-CH<sub>2</sub>-(CO)), 2.91 (m, 2H, (CO)-CH<sub>2</sub>-CH<sub>2</sub>-(CO)-O), 2.87 (m, 2H, (CO)-CH<sub>2</sub>-CH<sub>2</sub>-(CO)-O), 2.27 (s, 3H, Ar-CH<sub>3</sub>). <sup>13</sup>C-NMR (CDCl<sub>3</sub>, CD<sub>3</sub>OD 9:1): 201.0 (C=O ketone), 171.7 ((C=O)-O), 166.5 ((C=O)-NH); 134.1, 132.3, 130.3, 126.3, 126.1, 125.0 (Ar); 62.6 (O-CH<sub>2</sub>-(CO)), 46.9 (NH<sub>2</sub>-CH<sub>2</sub>-(CO)), 34.2 ((CO)-CH<sub>2</sub>-CH<sub>2</sub>-(CO)-O), 27.2 ((CO)-CH<sub>2</sub>-CH<sub>2</sub>-(CO)-O), 17.1 (Ar-CH<sub>3</sub>). HRMS (ESI) calcd for (M+H) C<sub>14</sub>H<sub>19</sub>N<sub>2</sub>O<sub>4</sub>: 279.1339. Found: 279.1336.

Compound **1i** was obtained by an alternative procedure: Compound **3i** (20 mg, 0.041 mmol) was dissolved in trifluoroacetic acid and 50 equivalents of thioanisole were slowly added. The mixture was stirred vigorously for 3 hours at room temperature and subsequently the solvents were removed *in vacuo*. CH<sub>2</sub>Cl<sub>2</sub> was added and the mixture was evaporated *in vacuo* (3 × 1 mL) to remove any residual TFA. The crude was washed with cyclohexane (2 × 1 mL) and dried *in vacuo* (the flask was heated to 50 °C in a airbath to facilitate evaporation of any residual thioanisole). The crude product was purified by recrystallization from CH<sub>2</sub>Cl<sub>2</sub> to yield 15 mg of **1i** (98%) as a white solid. Rf 0.10 (9:1 CH<sub>2</sub>Cl<sub>2</sub>-MeOH); <sup>1</sup>H-NMR (CDCl<sub>3</sub>, CD<sub>3</sub>OD 9:1): 7.41 (d, 1H, J 8.6 Hz, Ar), 7.37 (d, 1H, J 1.9 Hz, Ar), 7.32 (dd, 1H, J 8.6; 2.2 Hz, Ar), 4.73 (s, 2H, O-CH<sub>2</sub>-(CO)), 3.96 (s, 2H, NH<sub>2</sub>-CH<sub>2</sub>-(CO)), 2.89-2.80 (m, 4H, (CO)-CH<sub>2</sub>-CH<sub>2</sub>-(CO)-O, (CO)-CH<sub>2</sub>-CH<sub>2</sub>-(CO)-O), 2.24 (s, 3H, Ar-CH<sub>3</sub>). <sup>13</sup>C-NMR (CDCl<sub>3</sub>, CD<sub>3</sub>OD 9:1): 201.5 (C=O ketone), 171.7 ((C=O)-O), 166.3 ((C=O)-NH); 134.0, 133.6, 133.3, 129.4, 126.2, 119.3 (Ar); 62.9 (O-CH<sub>2</sub>-(CO)), 46.9 (NH<sub>2</sub>-CH<sub>2</sub>-(CO)); 34.2, 27.4 ((CO)-CH<sub>2</sub>-CH<sub>2</sub>-(CO)-O, (CO)-CH<sub>2</sub>-CH<sub>2</sub>-(CO)-O); 17.2 (Ar-CH<sub>3</sub>). HRMS (ESI) calcd for (M+H) C<sub>14</sub>H<sub>18</sub>N<sub>2</sub>BrO<sub>4</sub>: 357.0450 Found: 357.0447.



| Compound | Structure | logD (pH = 7.4) |
|----------|-----------|-----------------|
| 3a       |           | 0.19            |
| 3b       |           | 1.07            |
| 3c       |           | 1.91            |
| 3d       |           | 1.26            |
| 3e       |           | 2.01            |
| 3f       |           | 3.22            |
| 3g       |           | 3.29            |
| 3h       |           | 2.71            |
| 3i       |           | 4.50            |
| 3j       |           | 6.42            |

**Table S1.** Structures of the Cbz-protected esters of ALA with their estimated logD.

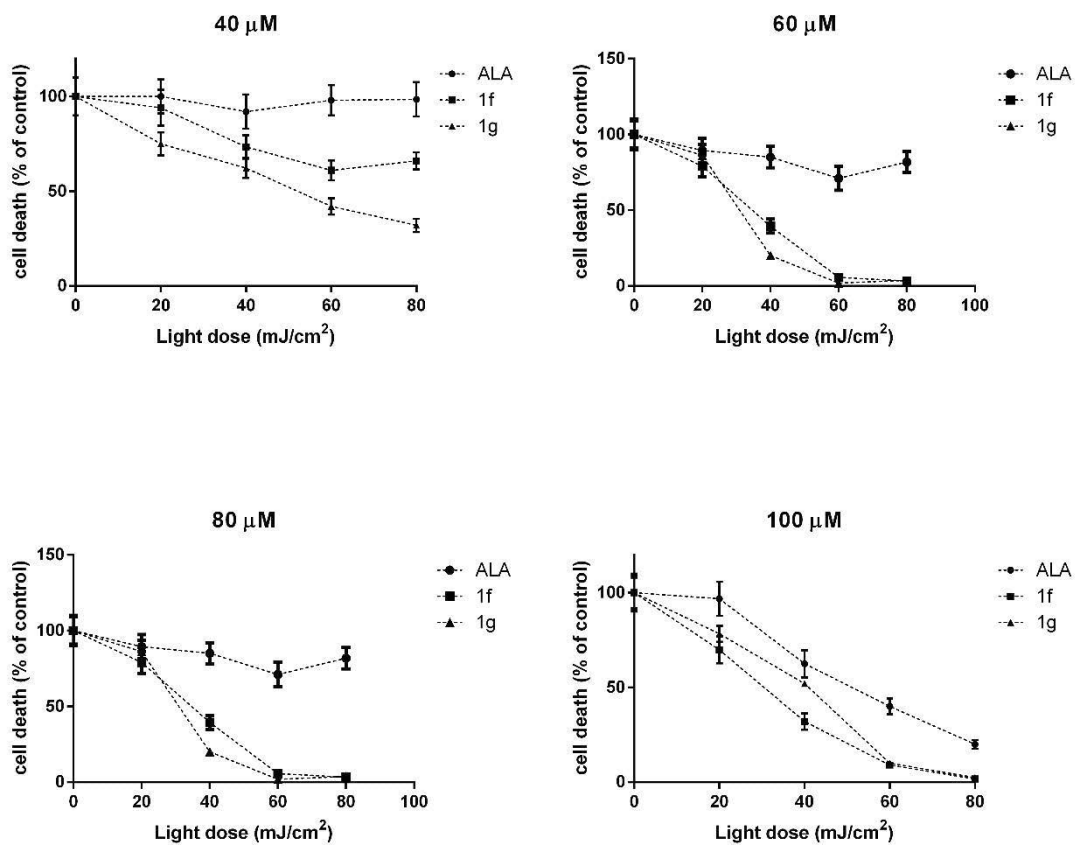

**Figure S1.** Cell survival after photodynamic treatment for compounds **1f** and **1g**. LM2 cells were incubated with different concentrations of the compounds during 3 h. Afterwards, PDT was performed, and cell viability was evaluated by the MTT assay, as percentage of control non-irradiated cells.

<sup>1</sup>H-NRM (500 MHz) of compound 2-(2-ethoxy-2-oxoethylamino)-2-oxoethyl-N-(benzyloxycarbonyl)-5-aminolevulinatate (**3a**)

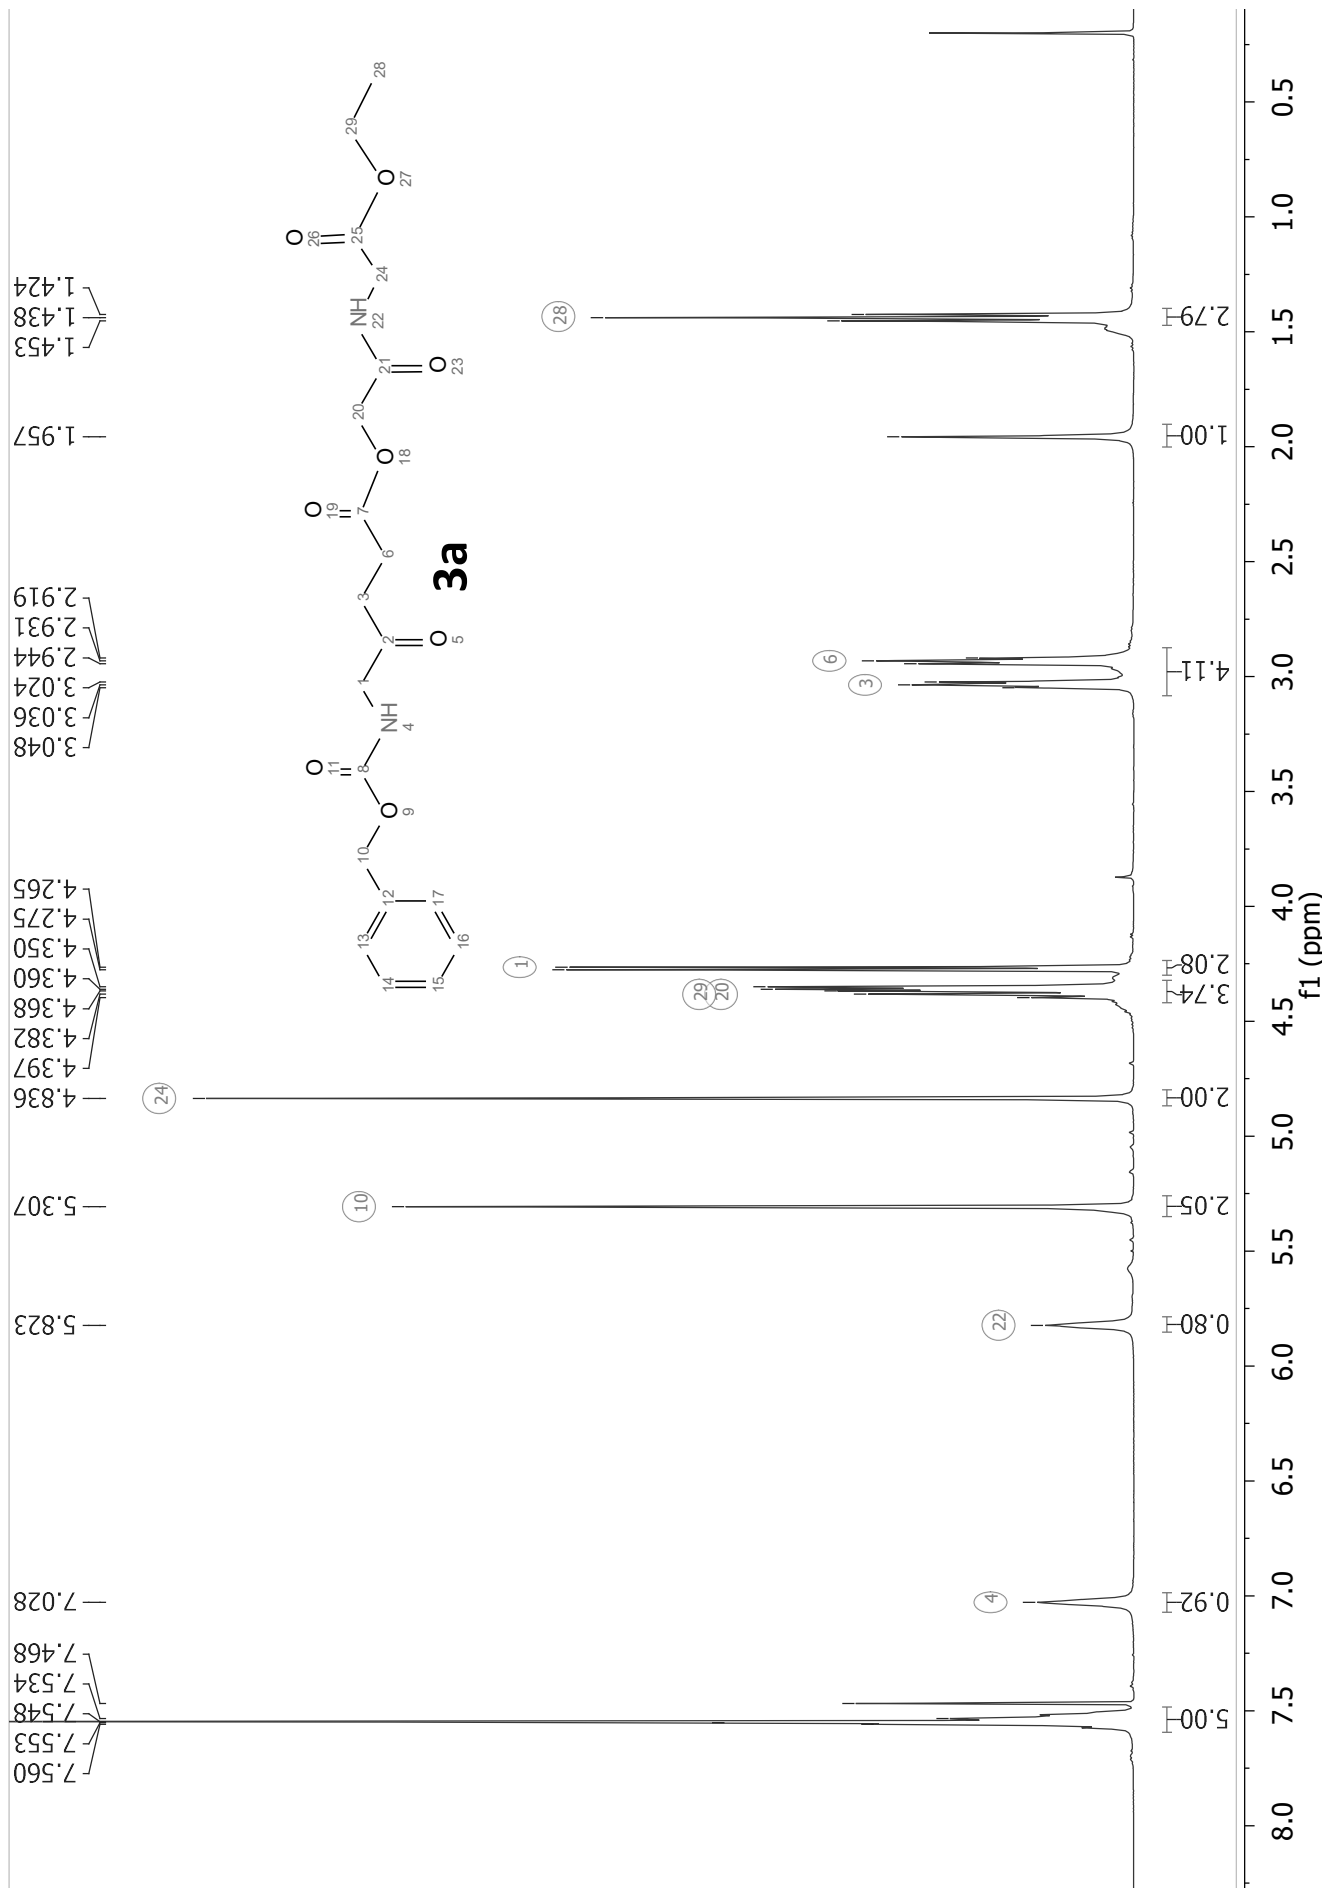

<sup>13</sup>C-NRM (50,3 MHz) of compound **3a**

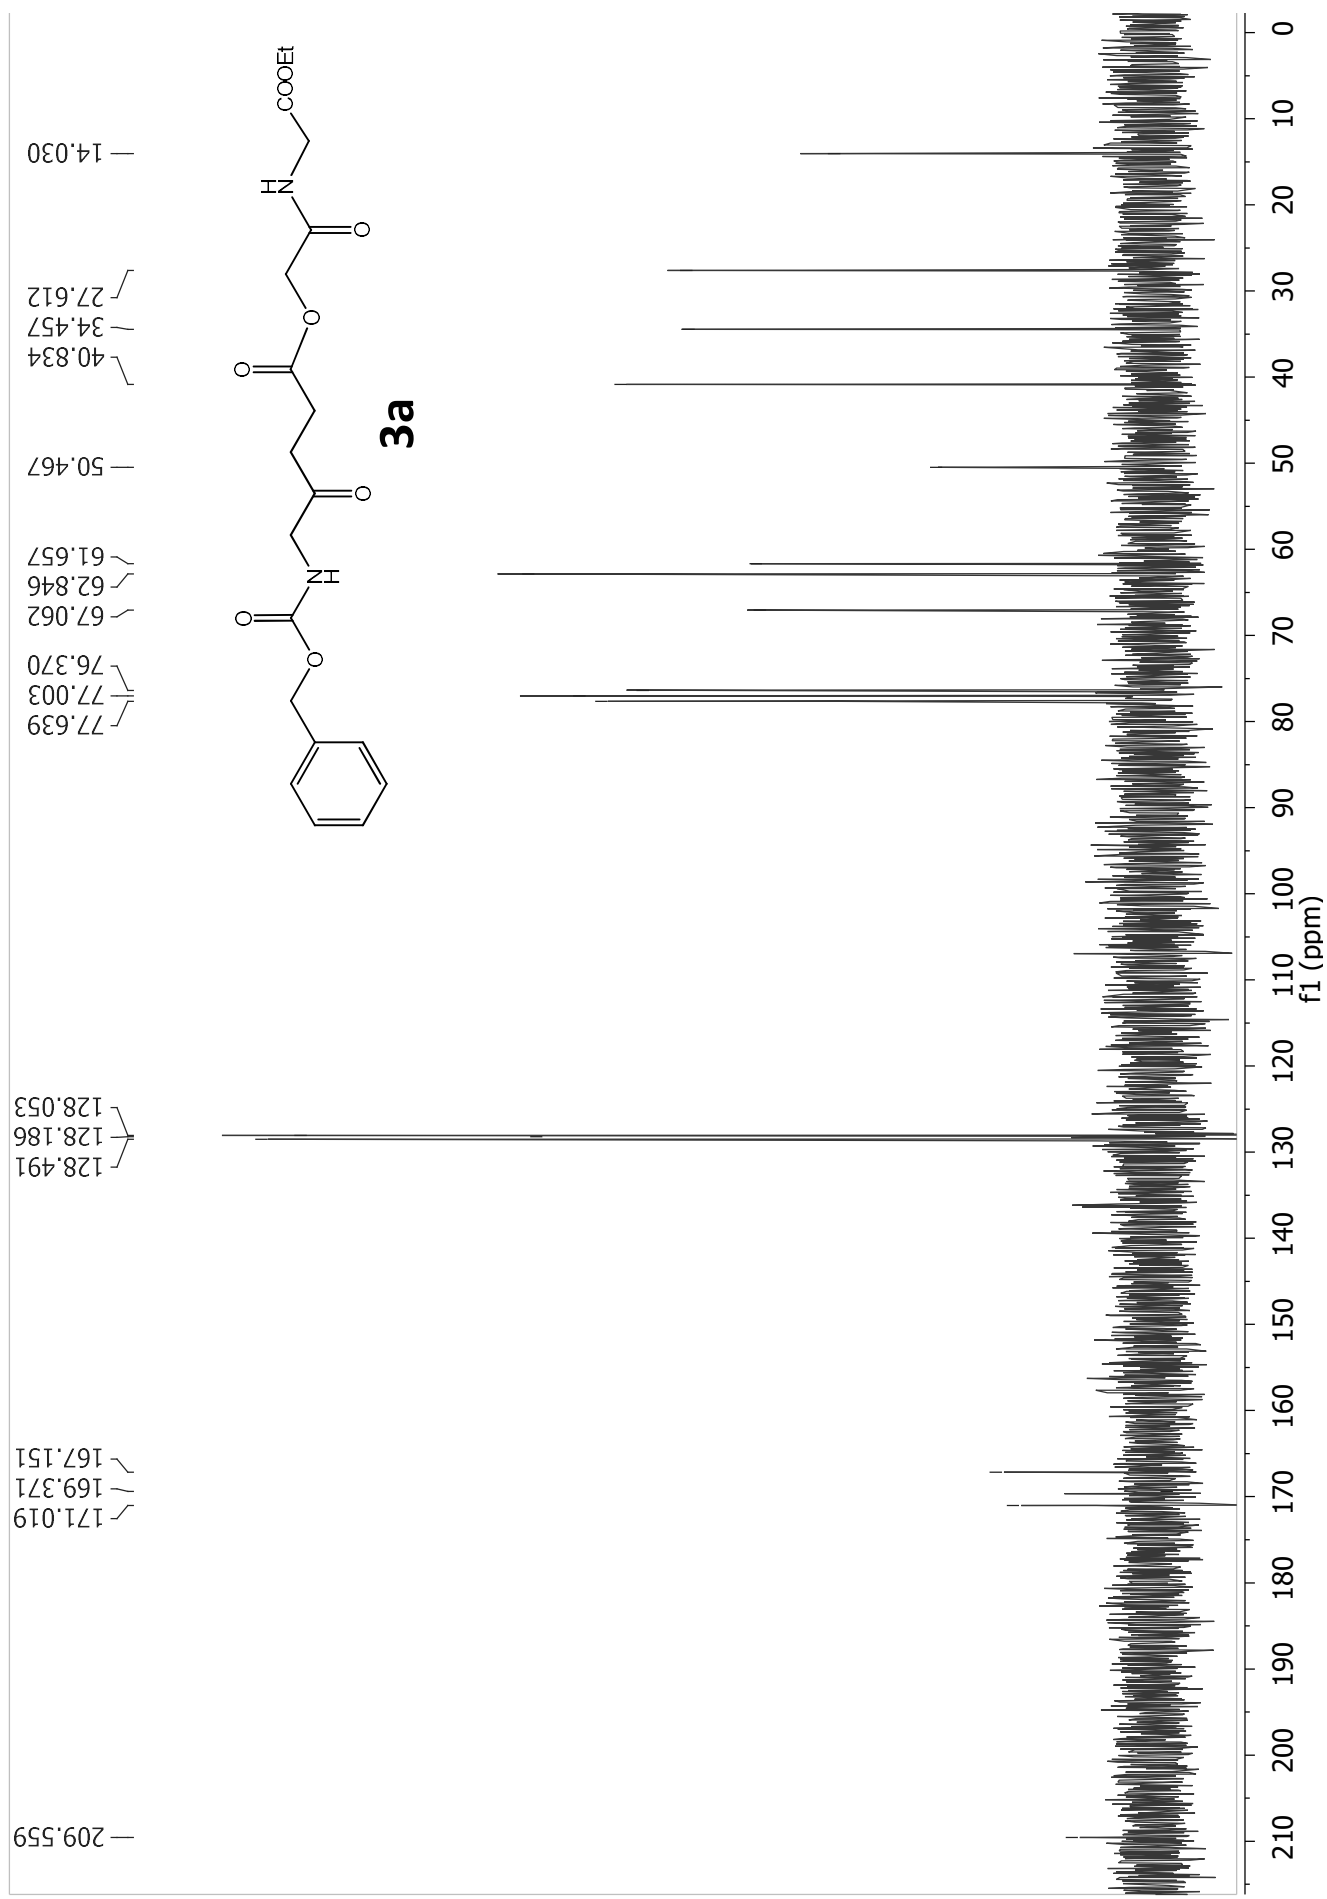

ESI MS/MS spectrum of m/z ([M+H]<sup>+</sup> cation of compound **3a** (collision Energy 10 eV)

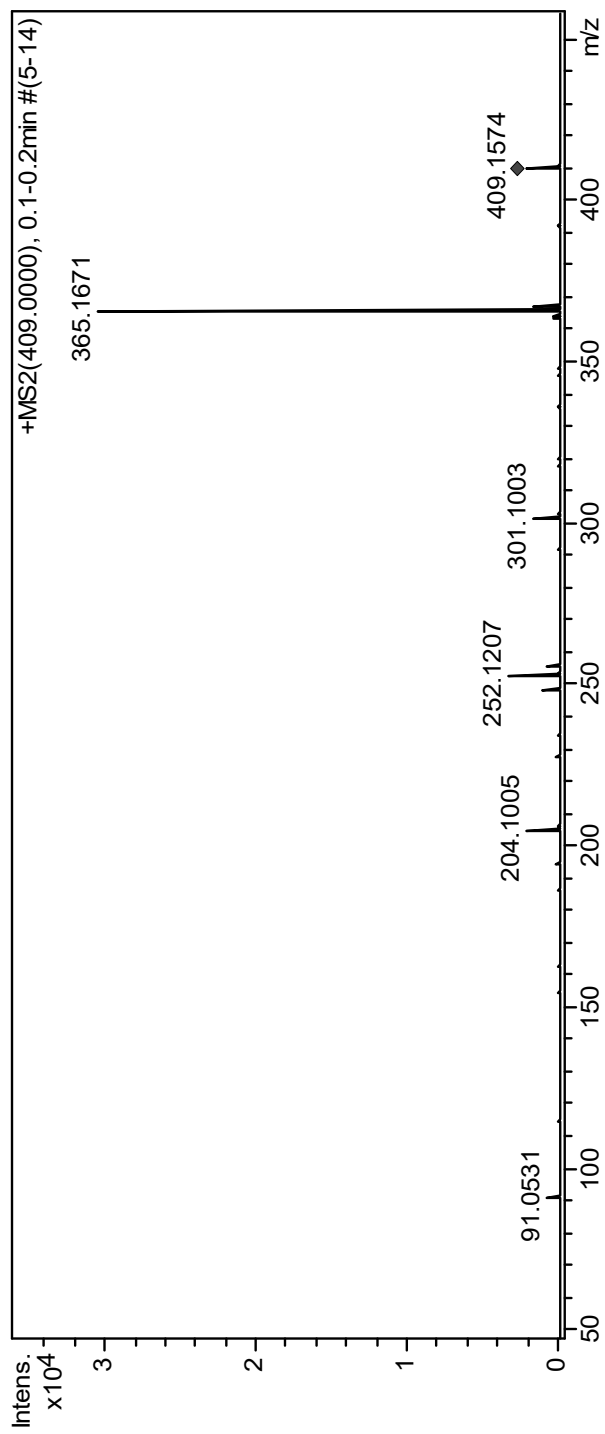

| Meas. m/z | Formula                                          | m/z      | err [ppm] | rdb | N-Rule e <sup>-</sup> Conf                      |
|-----------|--------------------------------------------------|----------|-----------|-----|-------------------------------------------------|
| 204.1005  | C <sub>12</sub> H <sub>14</sub> N <sub>2</sub> O | 204.1019 | 204.1019  | 6.9 | 6.5 ok even id Cy                               |
| 252.1207  | C <sub>13</sub> H <sub>18</sub> N <sub>2</sub> O | 252.1230 | 252.1230  | 9.3 | 5.5 ok even                                     |
| 301.1003  | C <sub>12</sub> H <sub>17</sub> N <sub>2</sub> O | 301.1030 | 301.1030  | 8.9 | 5.5 ok even [M+H-BnOH] <sup>+</sup>             |
| 365.1671  | C <sub>18</sub> H <sub>25</sub> N <sub>2</sub> O | 365.1707 | 365.1707  | 9.8 | 7.5 ok even [M+H-CO <sub>2</sub> ] <sup>+</sup> |
| 409.1574  | C <sub>19</sub> H <sub>25</sub> N <sub>2</sub> O | 409.1605 | 409.1605  | 7.7 | 8.5 ok even [M+H] <sup>+</sup>                  |

<sup>1</sup>H-NRM (500 MHz) of compound 2-(diethoxyphosphorylmethylamino)-2-oxoethyl-N-(benzyloxycarbonyl)-5-aminolevulinatate (**3b**)

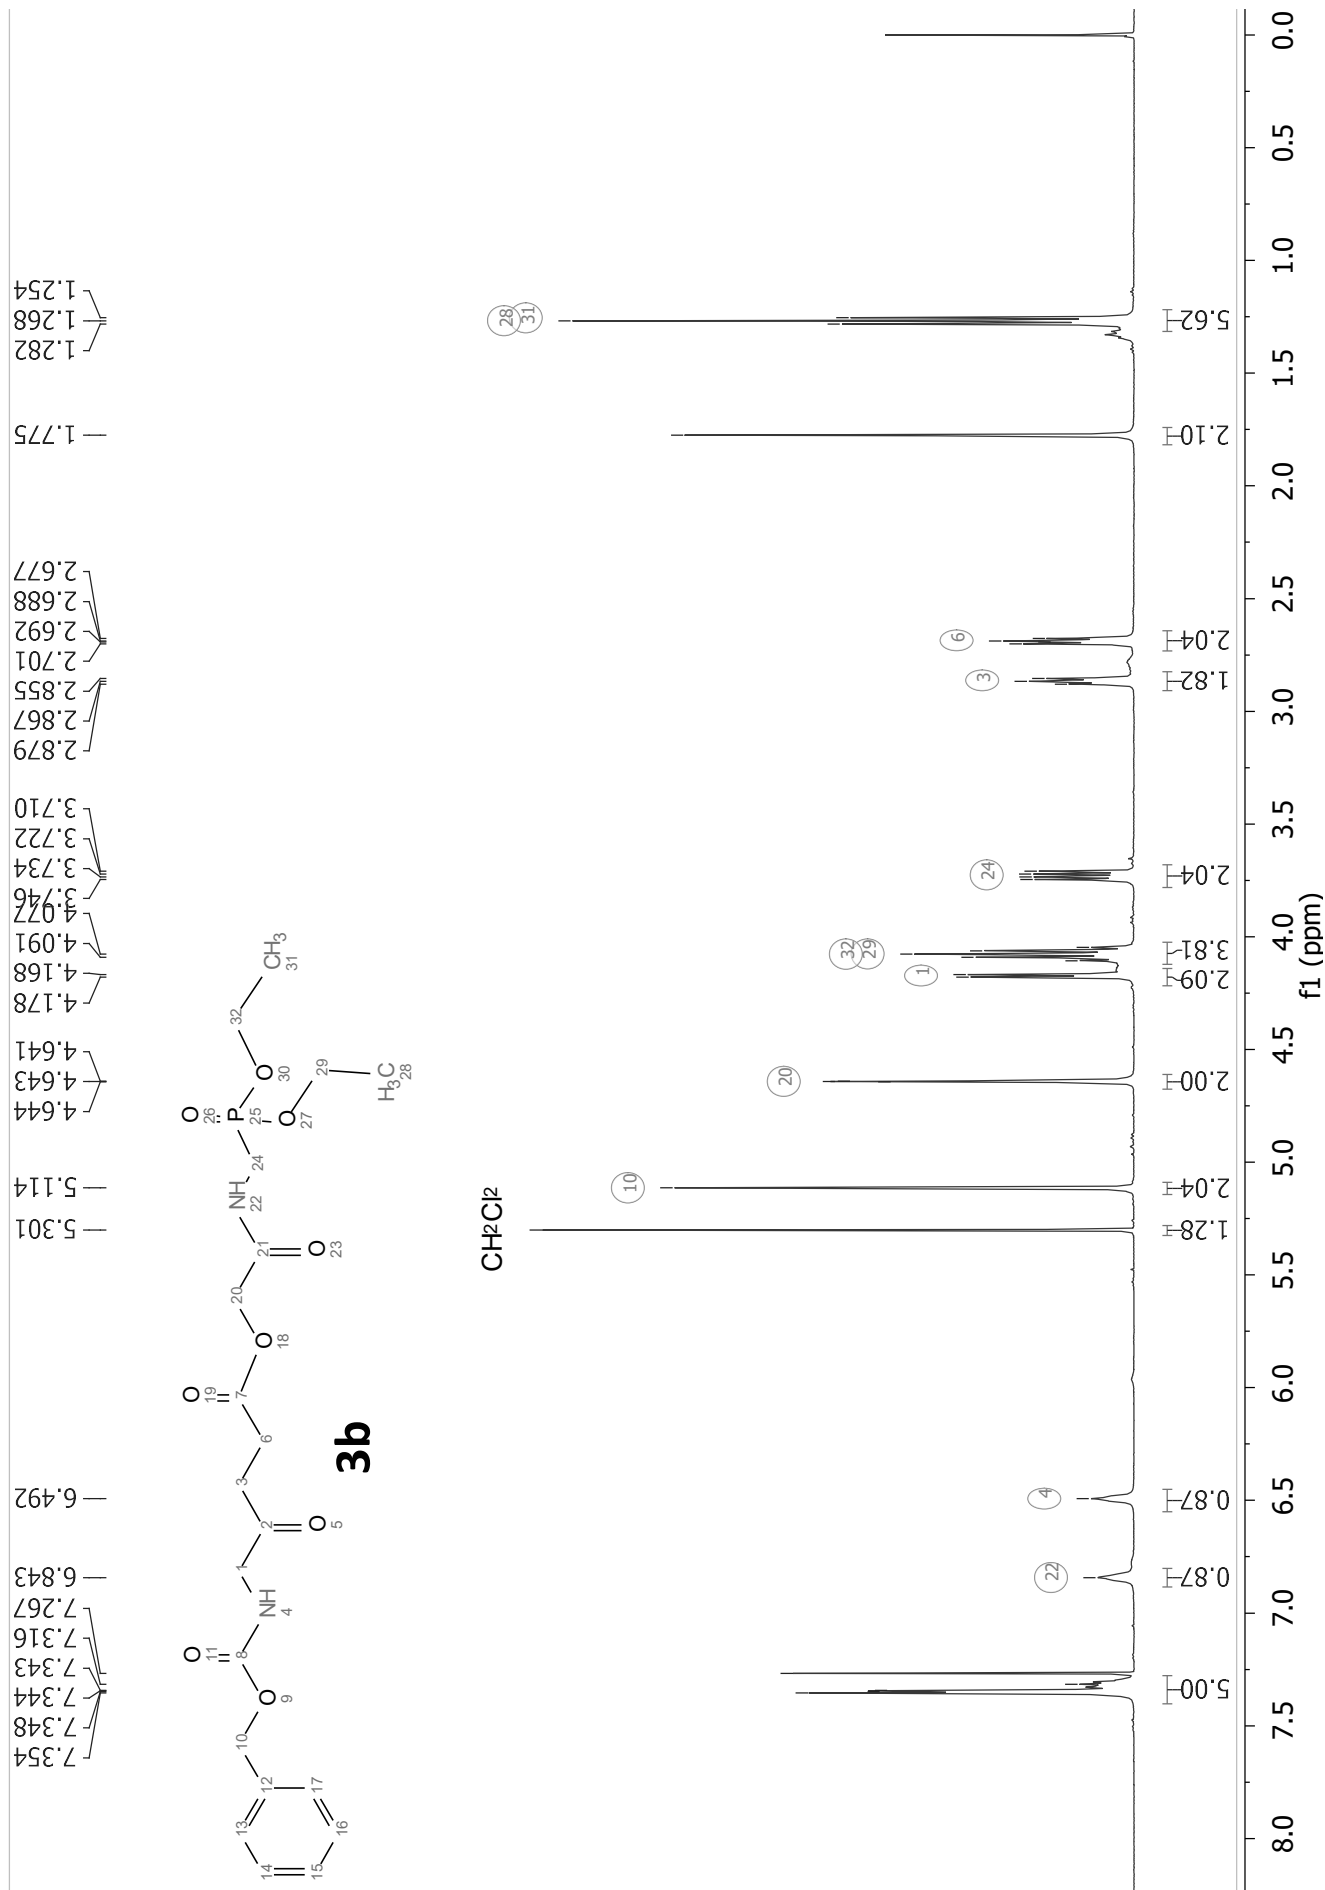

<sup>13</sup>C-NRM (125,7 MHz) of compound **3b**

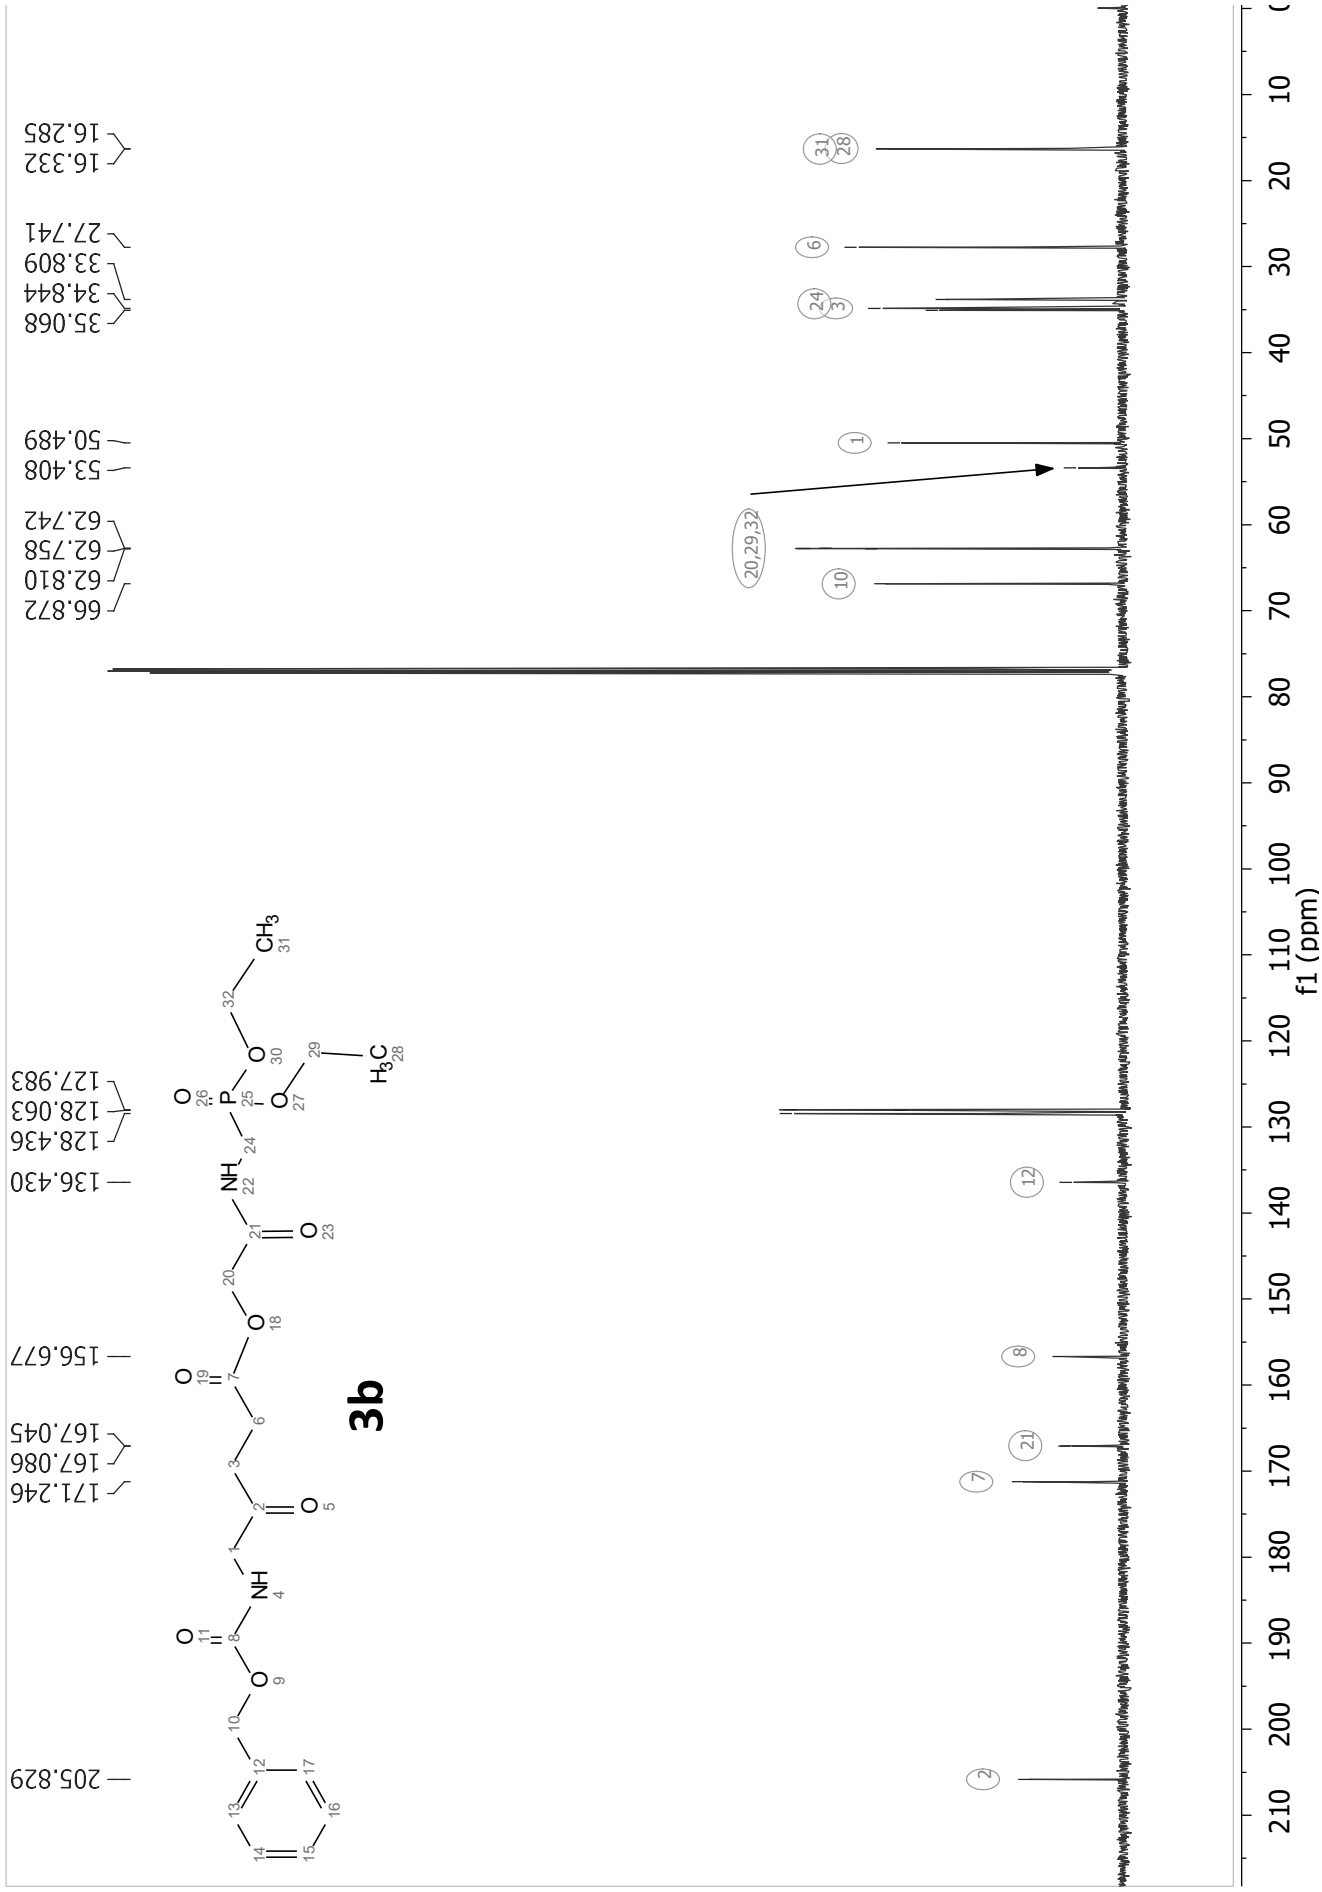

HSQC-DEPT (500 MHz) of compound **3b**

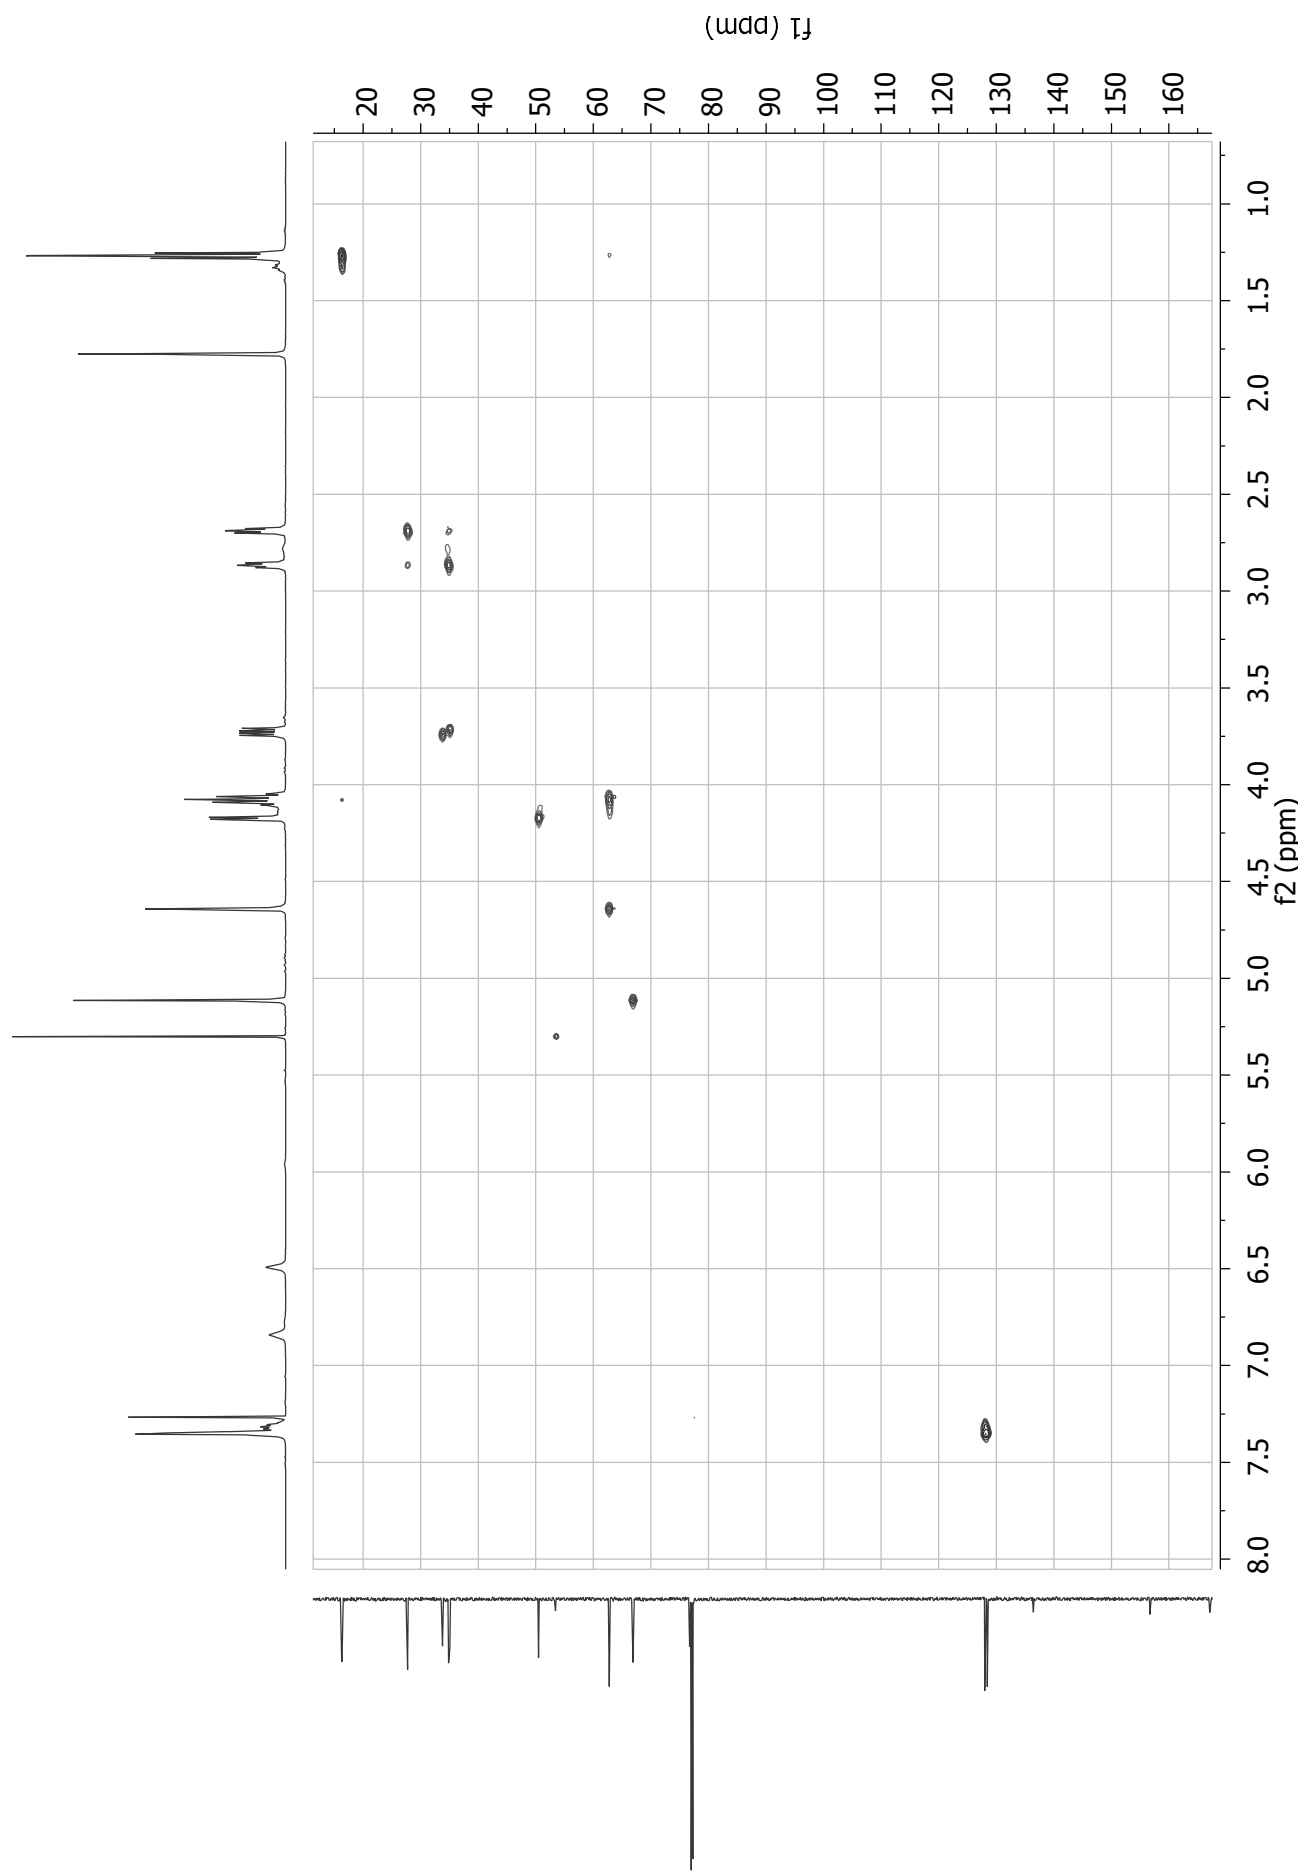



# HMBC (500 MHz) of compound **3b**

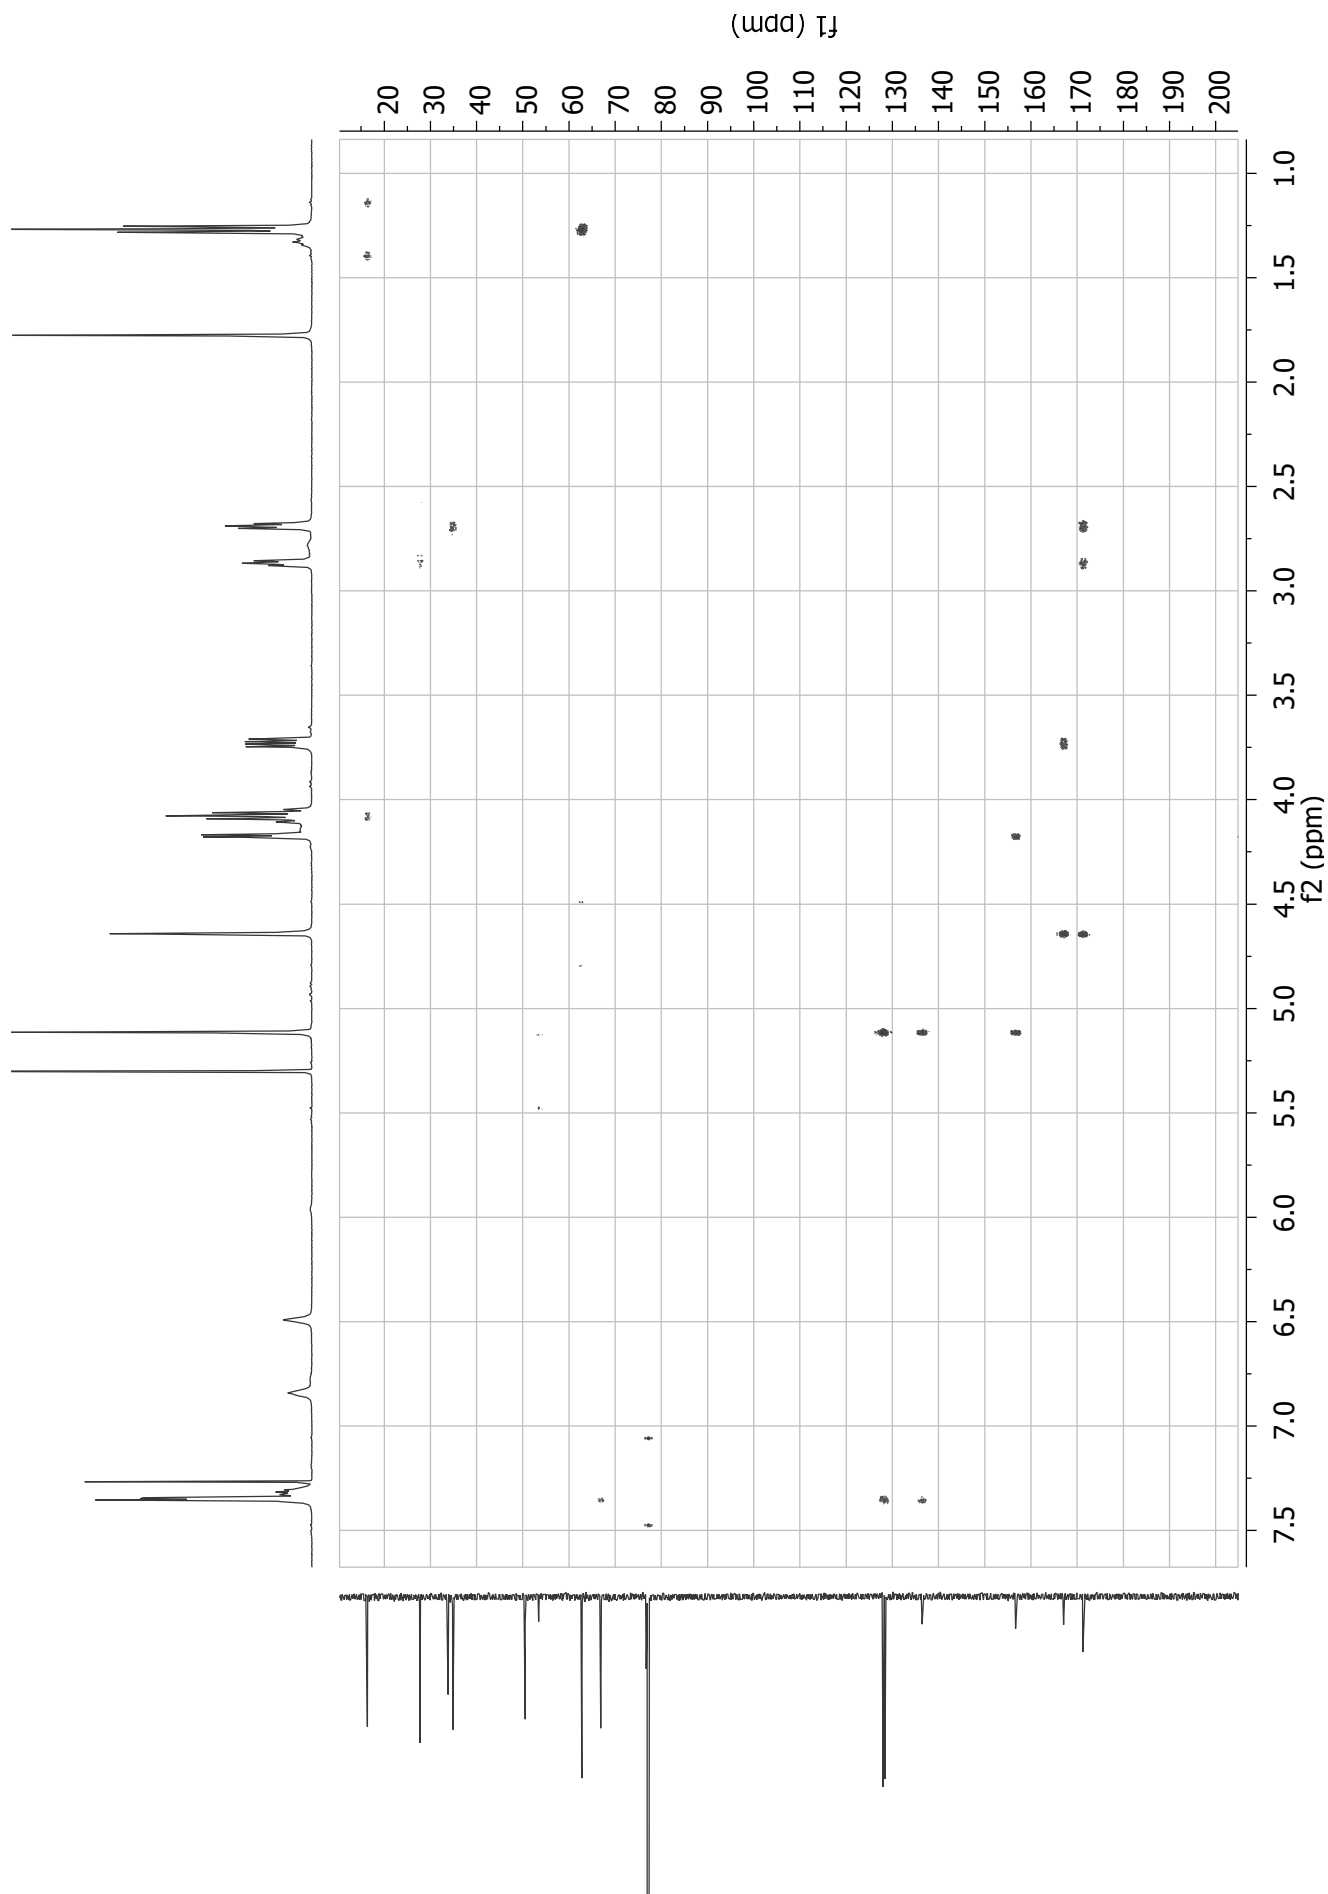

ESI MS/MS spectrum of m/z ([M+H]<sup>+</sup> cation of compound **3b** (collision Energy 10 eV)

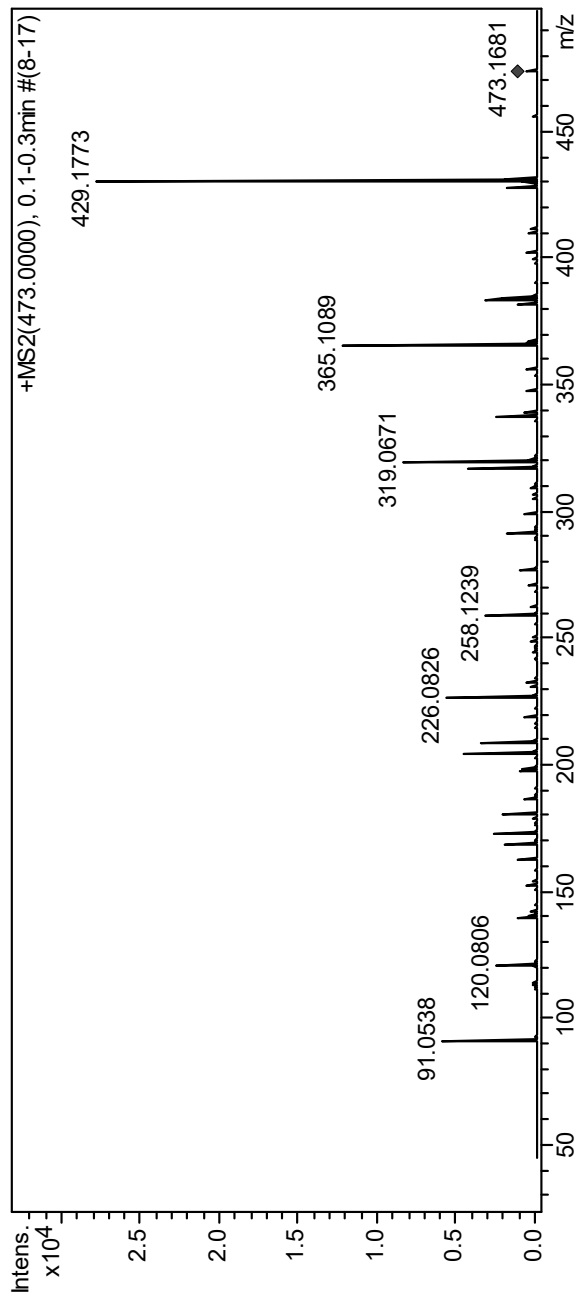

| Meas. m/z | Formula             | m/z      | err [ppm] | rdb | N-Rule | e <sup>-</sup> Conf                             |
|-----------|---------------------|----------|-----------|-----|--------|-------------------------------------------------|
| 91.0538   | C 7 H 7             | 91.0542  | 4.8       | 4.5 | ok     | even trop <sup>+</sup>                          |
| 204.1012  | C 12 H 14 N O 2     | 204.1019 | 3.4       | 6.5 | ok     | even id anteriores                              |
| 208.0715  | C 7 H 15 N O 4 P    | 208.0733 | 8.9       | 1.5 | ok     | even ruptura CO-O→-H <sub>2</sub> O             |
| 226.0826  | C 7 H 17 N O 5 P    | 226.0839 | 5.6       | 0.5 | ok     | even ruptura CO-O→                              |
| 319.0671  | C 11 H 16 N 2 O 7 P | 319.0690 | 5.9       | 5.5 | ok     | even [M+H- EtOH-BnOH] <sup>+</sup>              |
| 365.1089  | C 13 H 22 N 2 O 8 P | 365.1108 | 5.3       | 4.5 | ok     | even [M+H-BnOH] <sup>+</sup>                    |
| 383.1346  | C 17 H 24 N 2 O 6 P | 383.1366 | 5.2       | 7.5 | ok     | even [M+H- CO <sub>2</sub> - EtOH] <sup>+</sup> |
| 429.1773  | C 19 H 30 N 2 O 7 P | 429.1785 | 2.7       | 6.5 | ok     | even [M+H- CO <sub>2</sub> ] <sup>+</sup>       |

<sup>1</sup>H-NRM (500 MHz) of compound 2-(3,4-dimethoxyphenethylamino)-2-oxoethyl-N-(benzyloxycarbonyl)-5-aminolevulinat (3c)

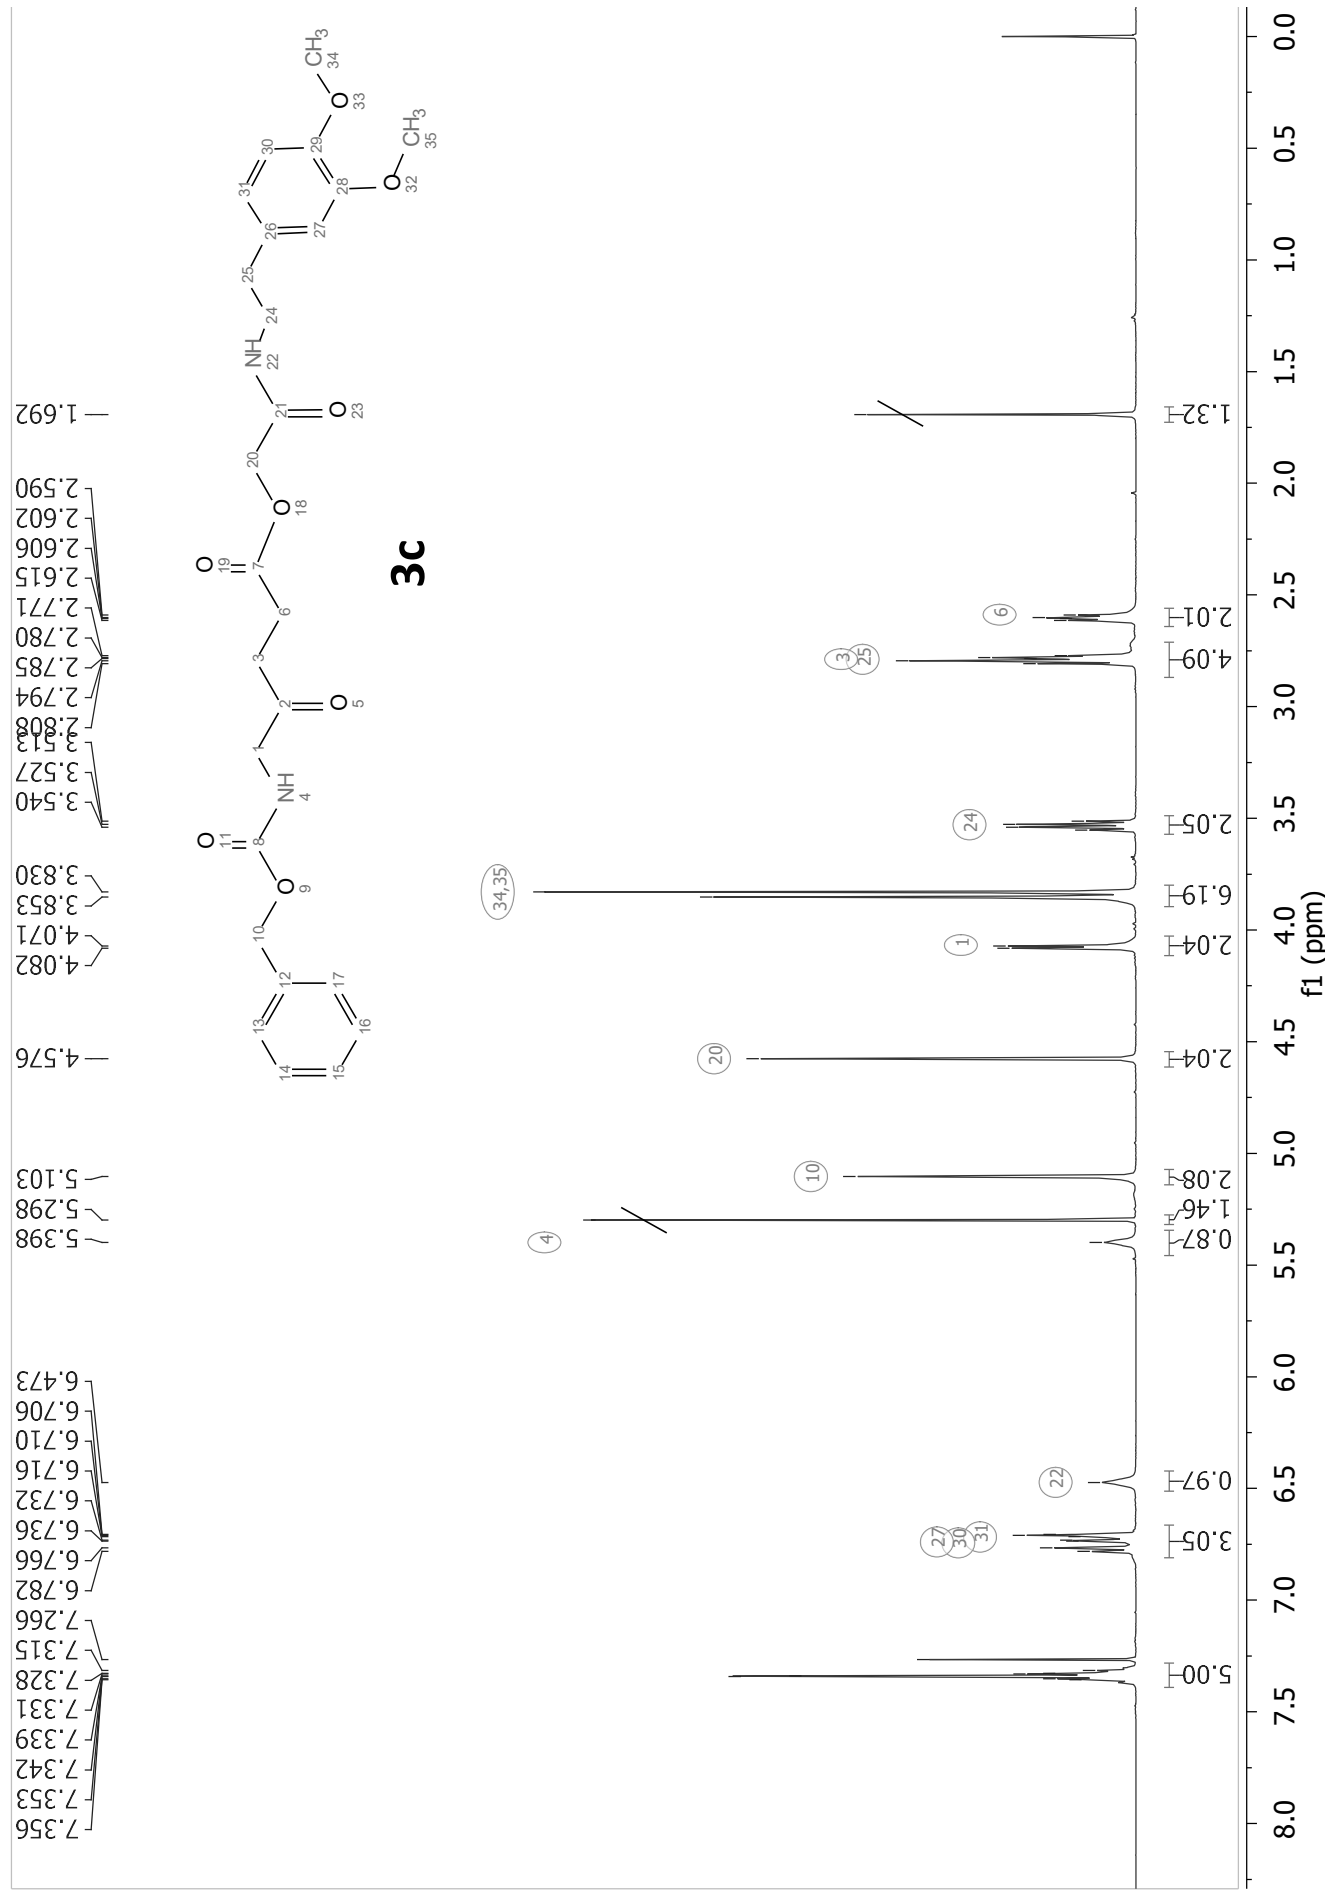

# <sup>13</sup>C-NRM (125,7 MHz) of compound **3c**

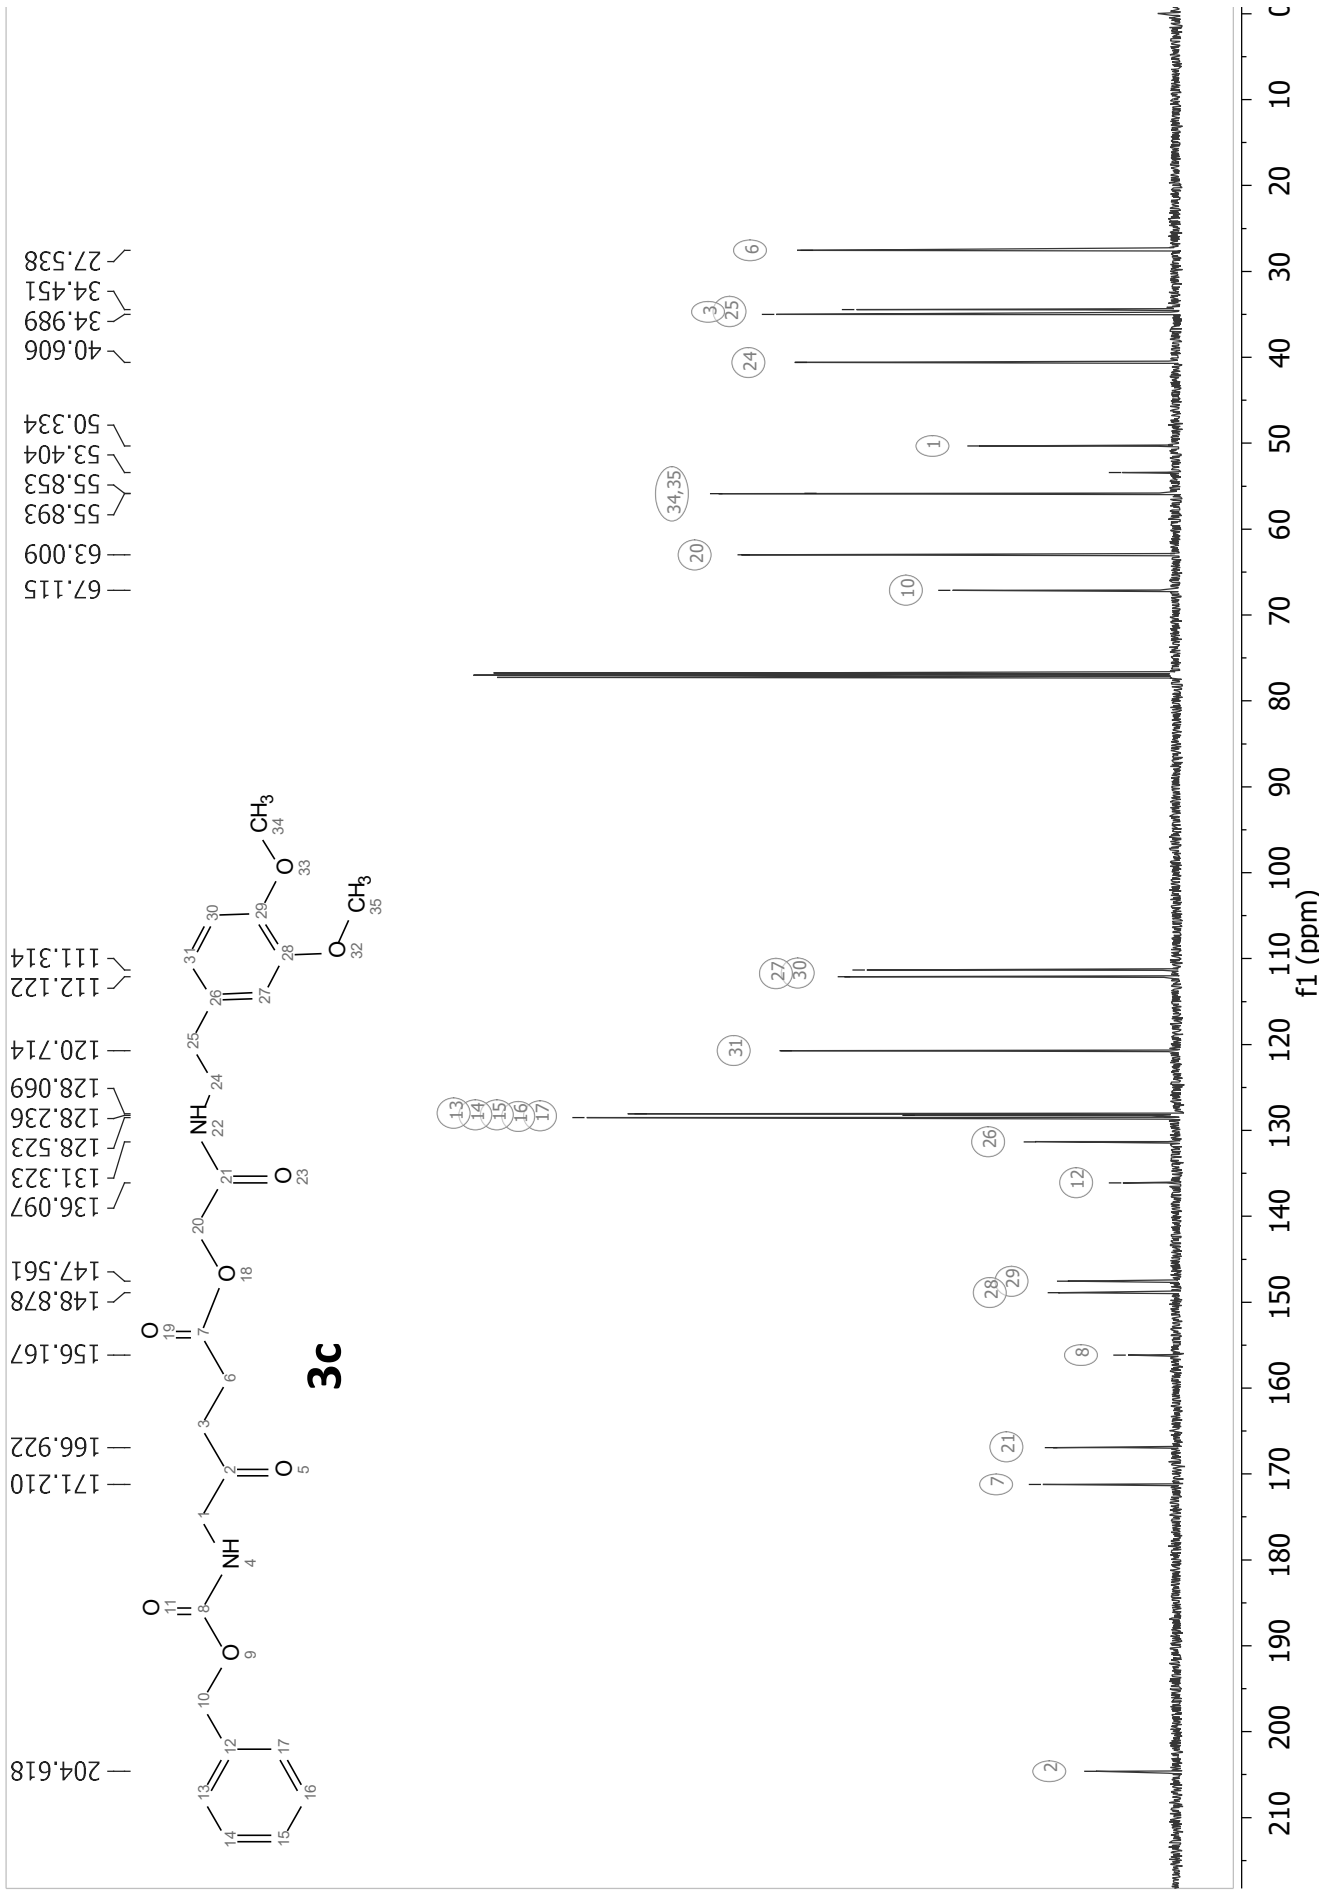

HSQC-DEPT (500 MHz) of compound **3c**

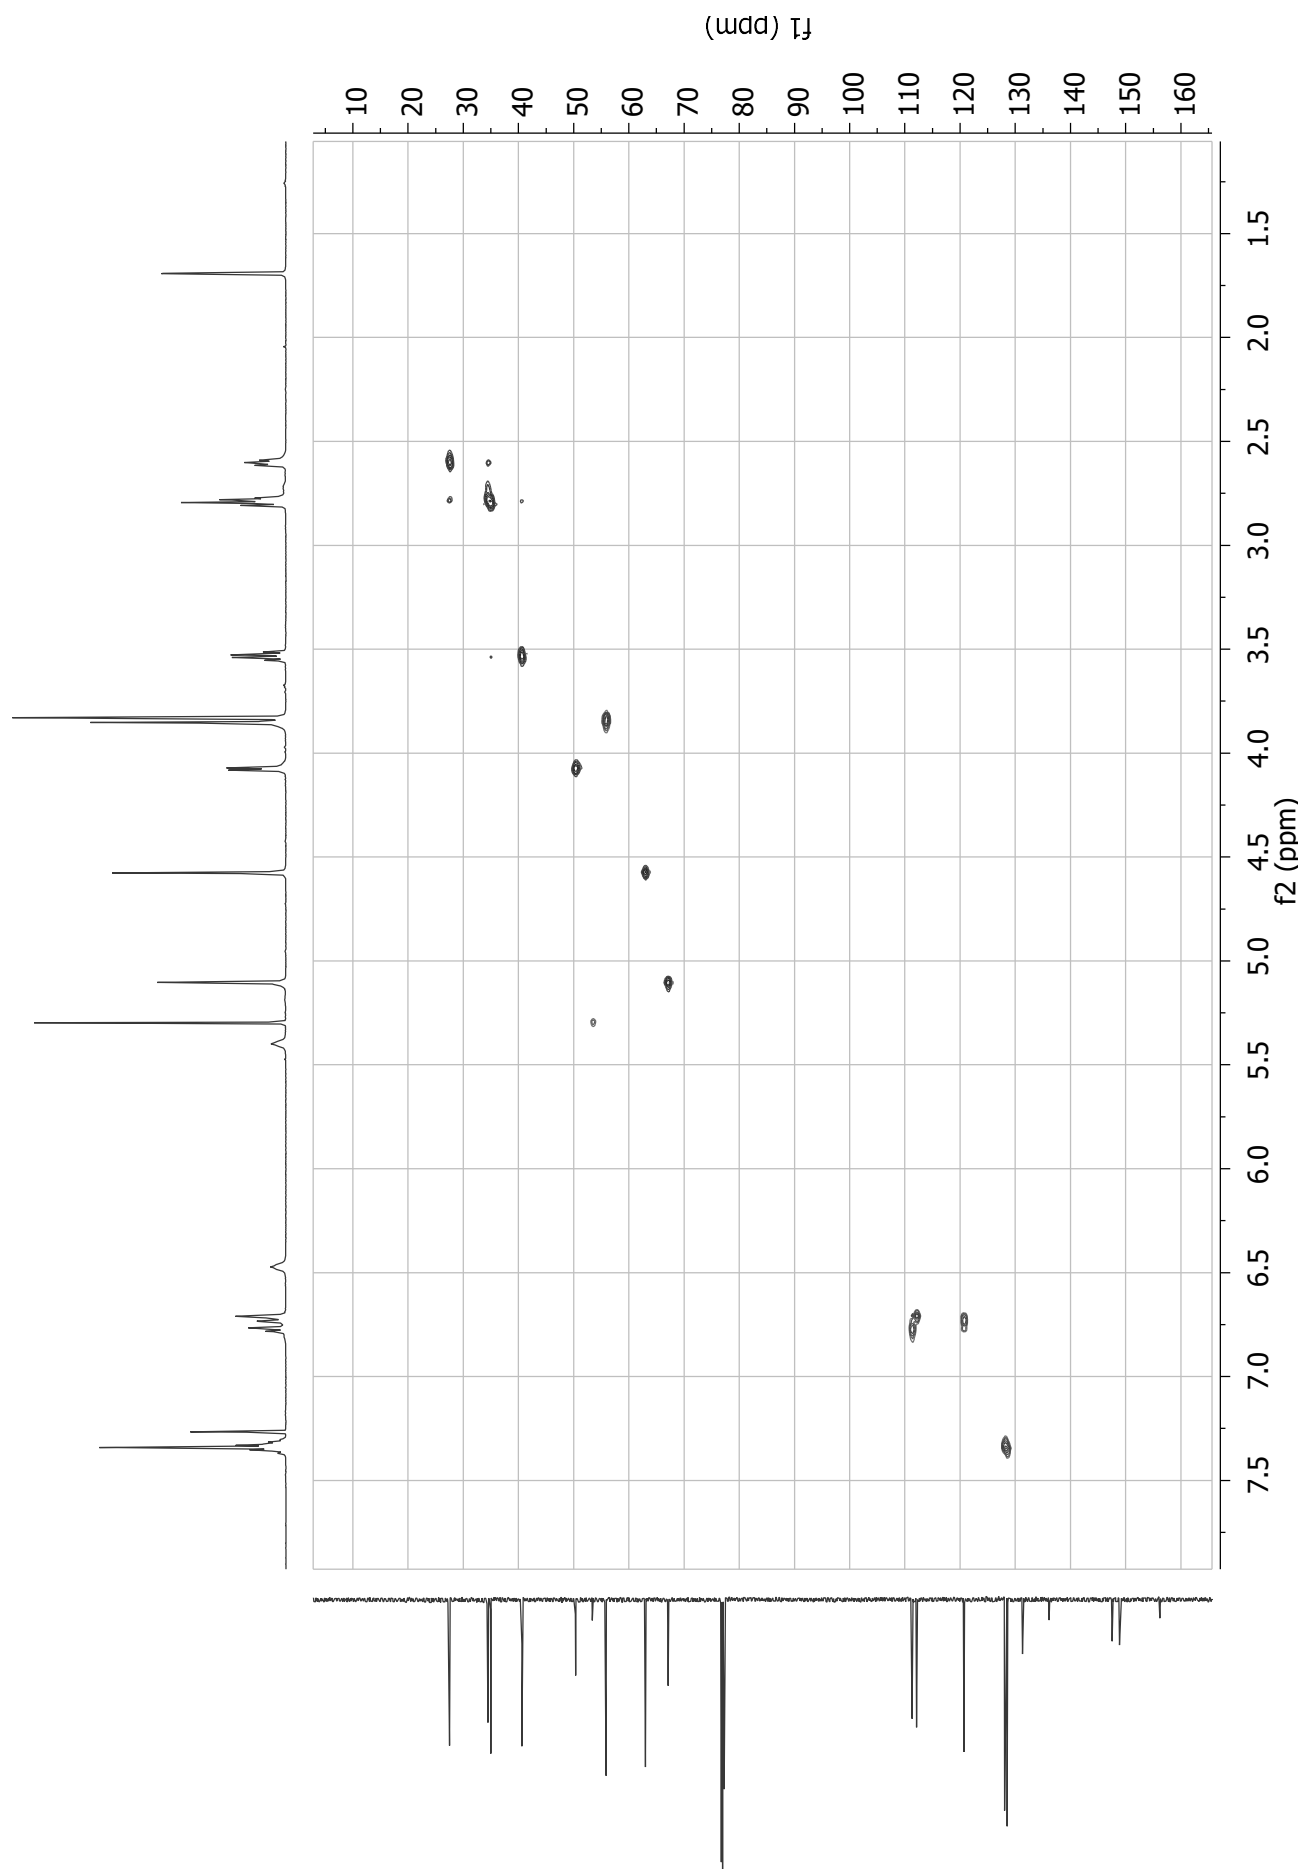

# HMBC (500 MHz) of compound **3c**

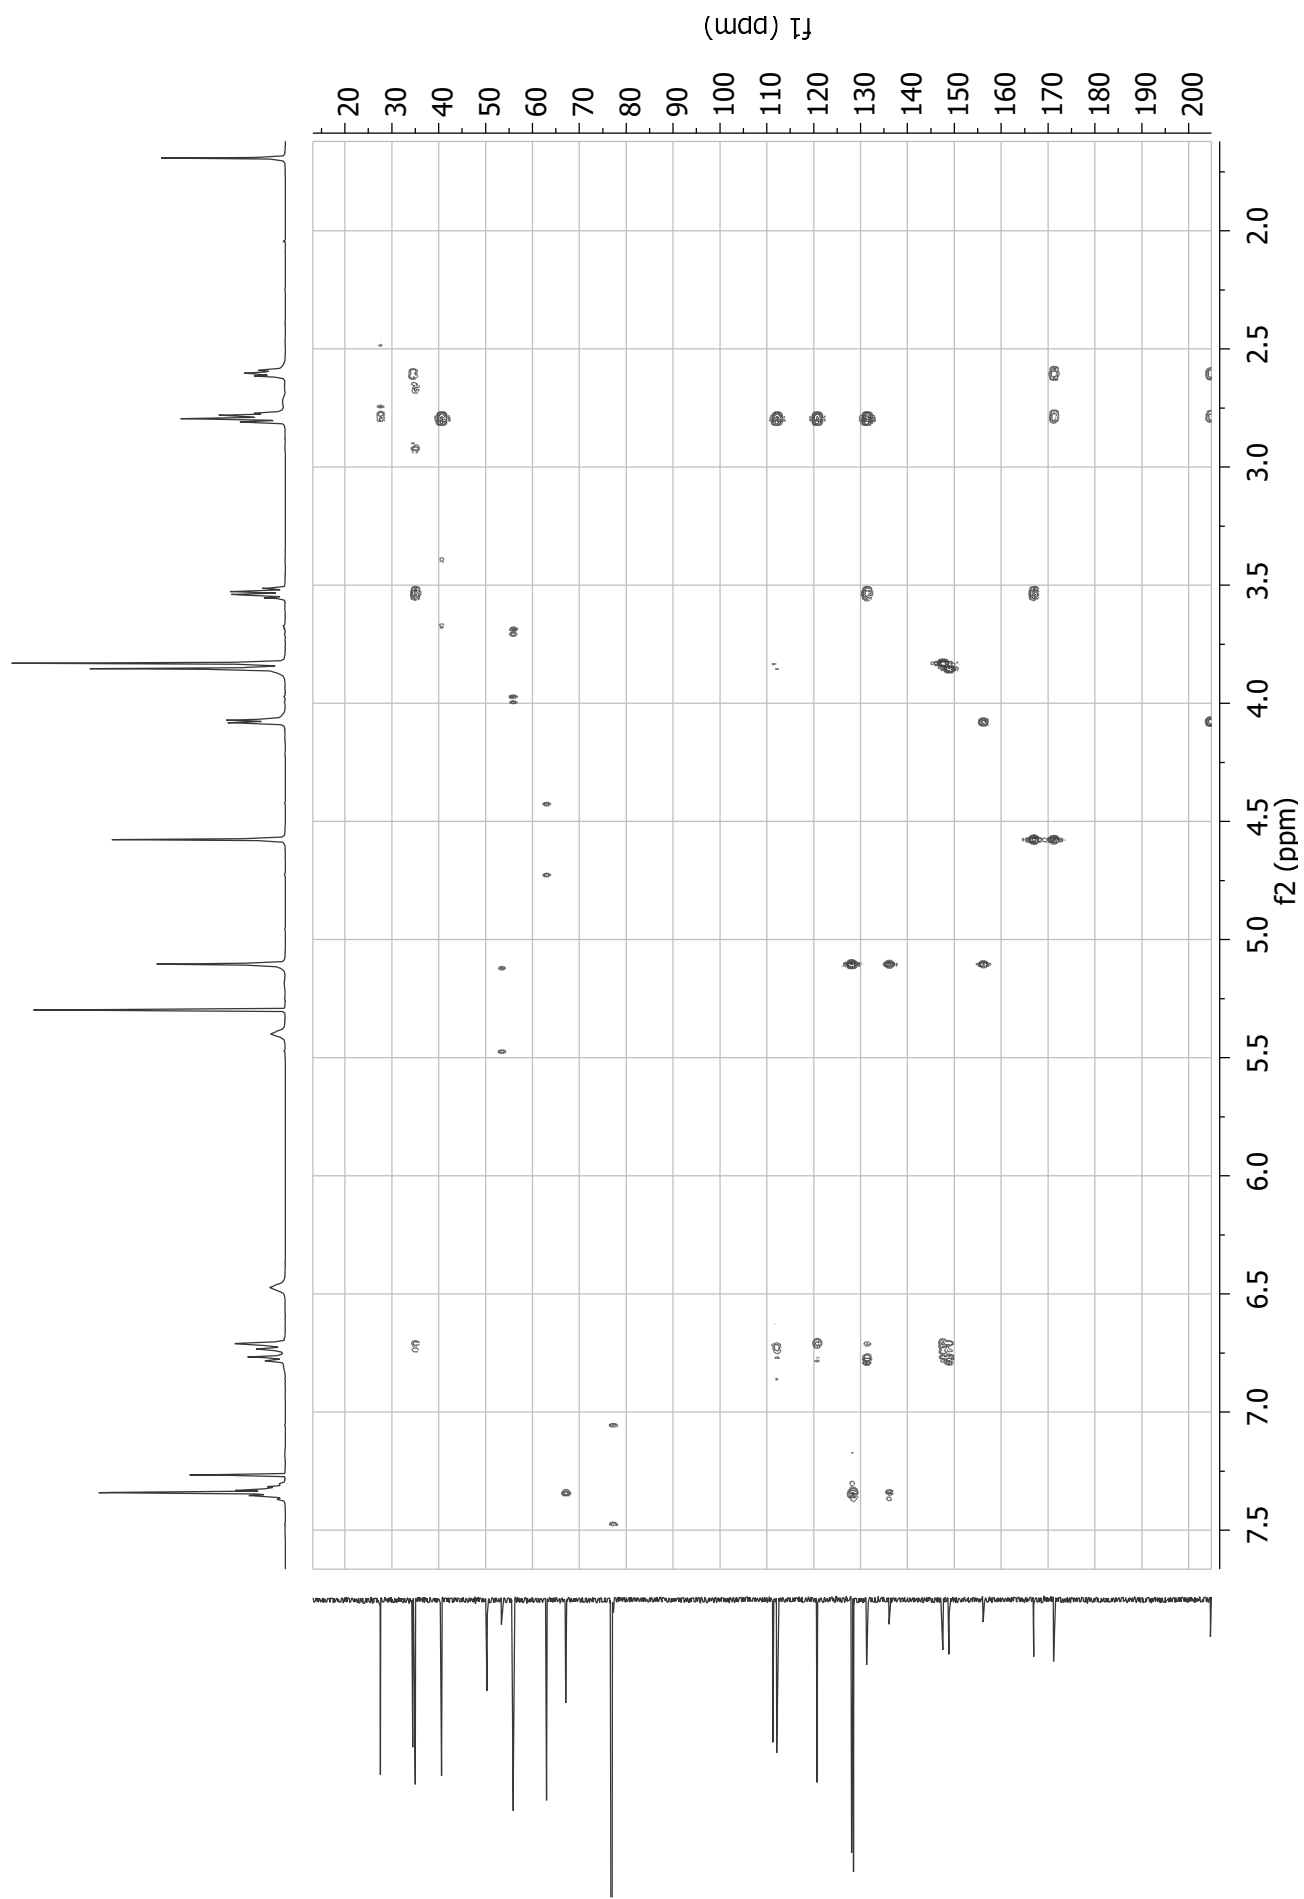

ESI MS/MS spectrum of m/z  $[M+H]^+$  cation of compound **3c** (collision Energy 10 eV)

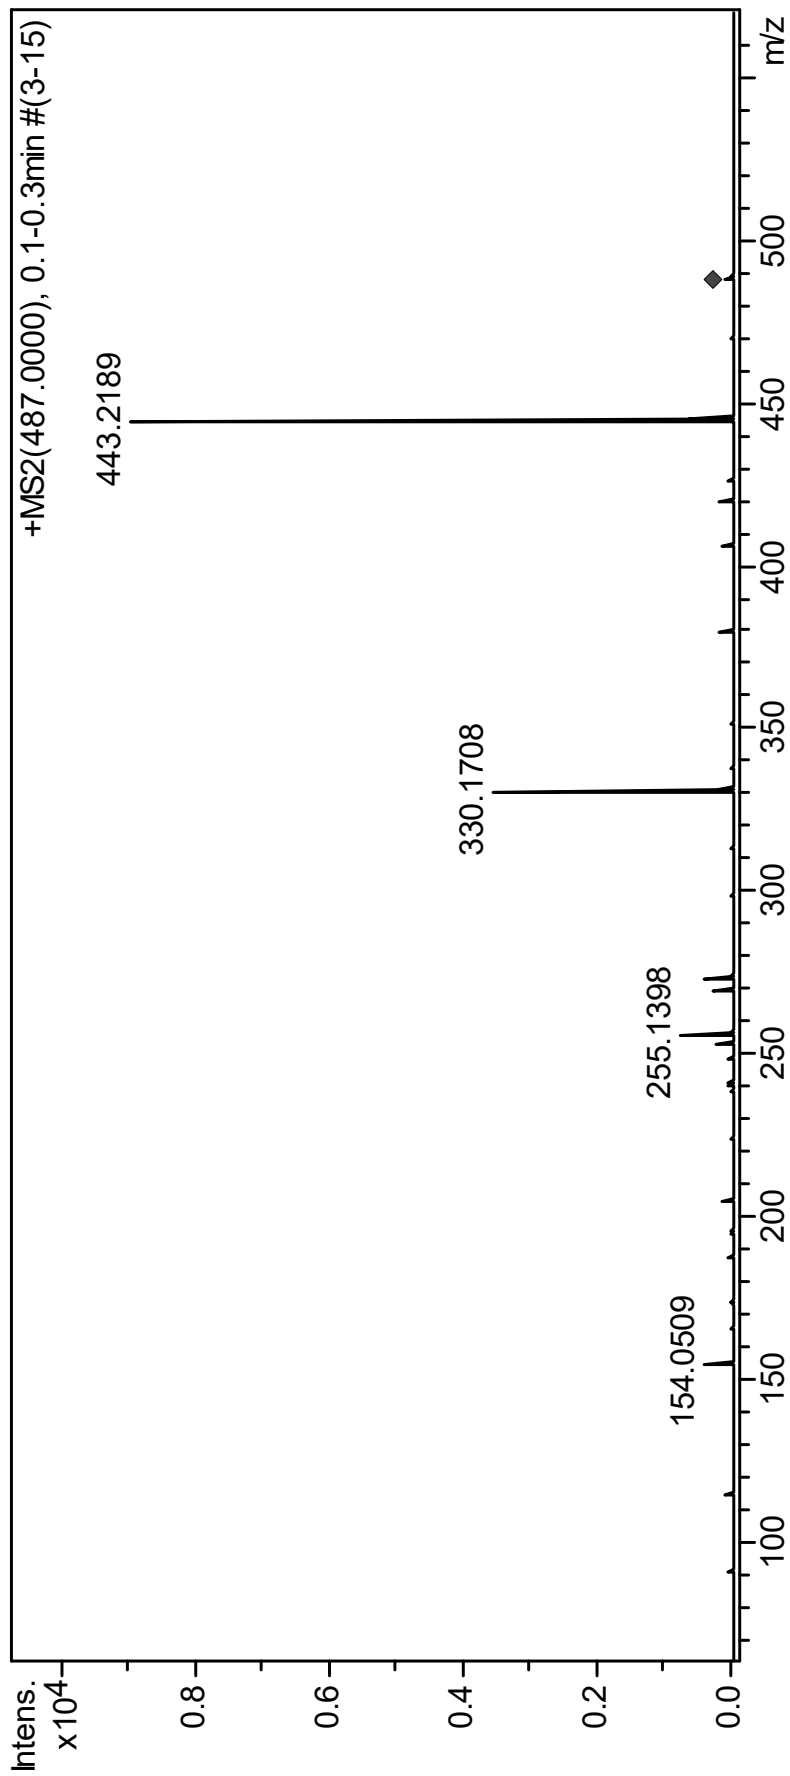

| Meas. m/z | Formula                                                       | m/z      | err [ppm] | rdb  | N-Rule | e <sup>-</sup> | Conf                                |
|-----------|---------------------------------------------------------------|----------|-----------|------|--------|----------------|-------------------------------------|
| 330.1708  | C <sub>19</sub> H <sub>24</sub> N <sub>2</sub> O <sub>4</sub> | 330.1700 | -2.5      | 8.5  | ok     | even           |                                     |
| 443.2189  | C <sub>24</sub> H <sub>31</sub> N <sub>2</sub> O <sub>6</sub> | 443.2177 | -2.7      | 10.5 | ok     | even           | [M+H-CO <sub>2</sub> ] <sup>+</sup> |

<sup>1</sup>H-NRM (500 MHz) of compound 2-(*t*-butylamino)-2-oxoethyl-*N*-(benzyloxycarbonyl)-5-aminolevulinatate (**3d**)

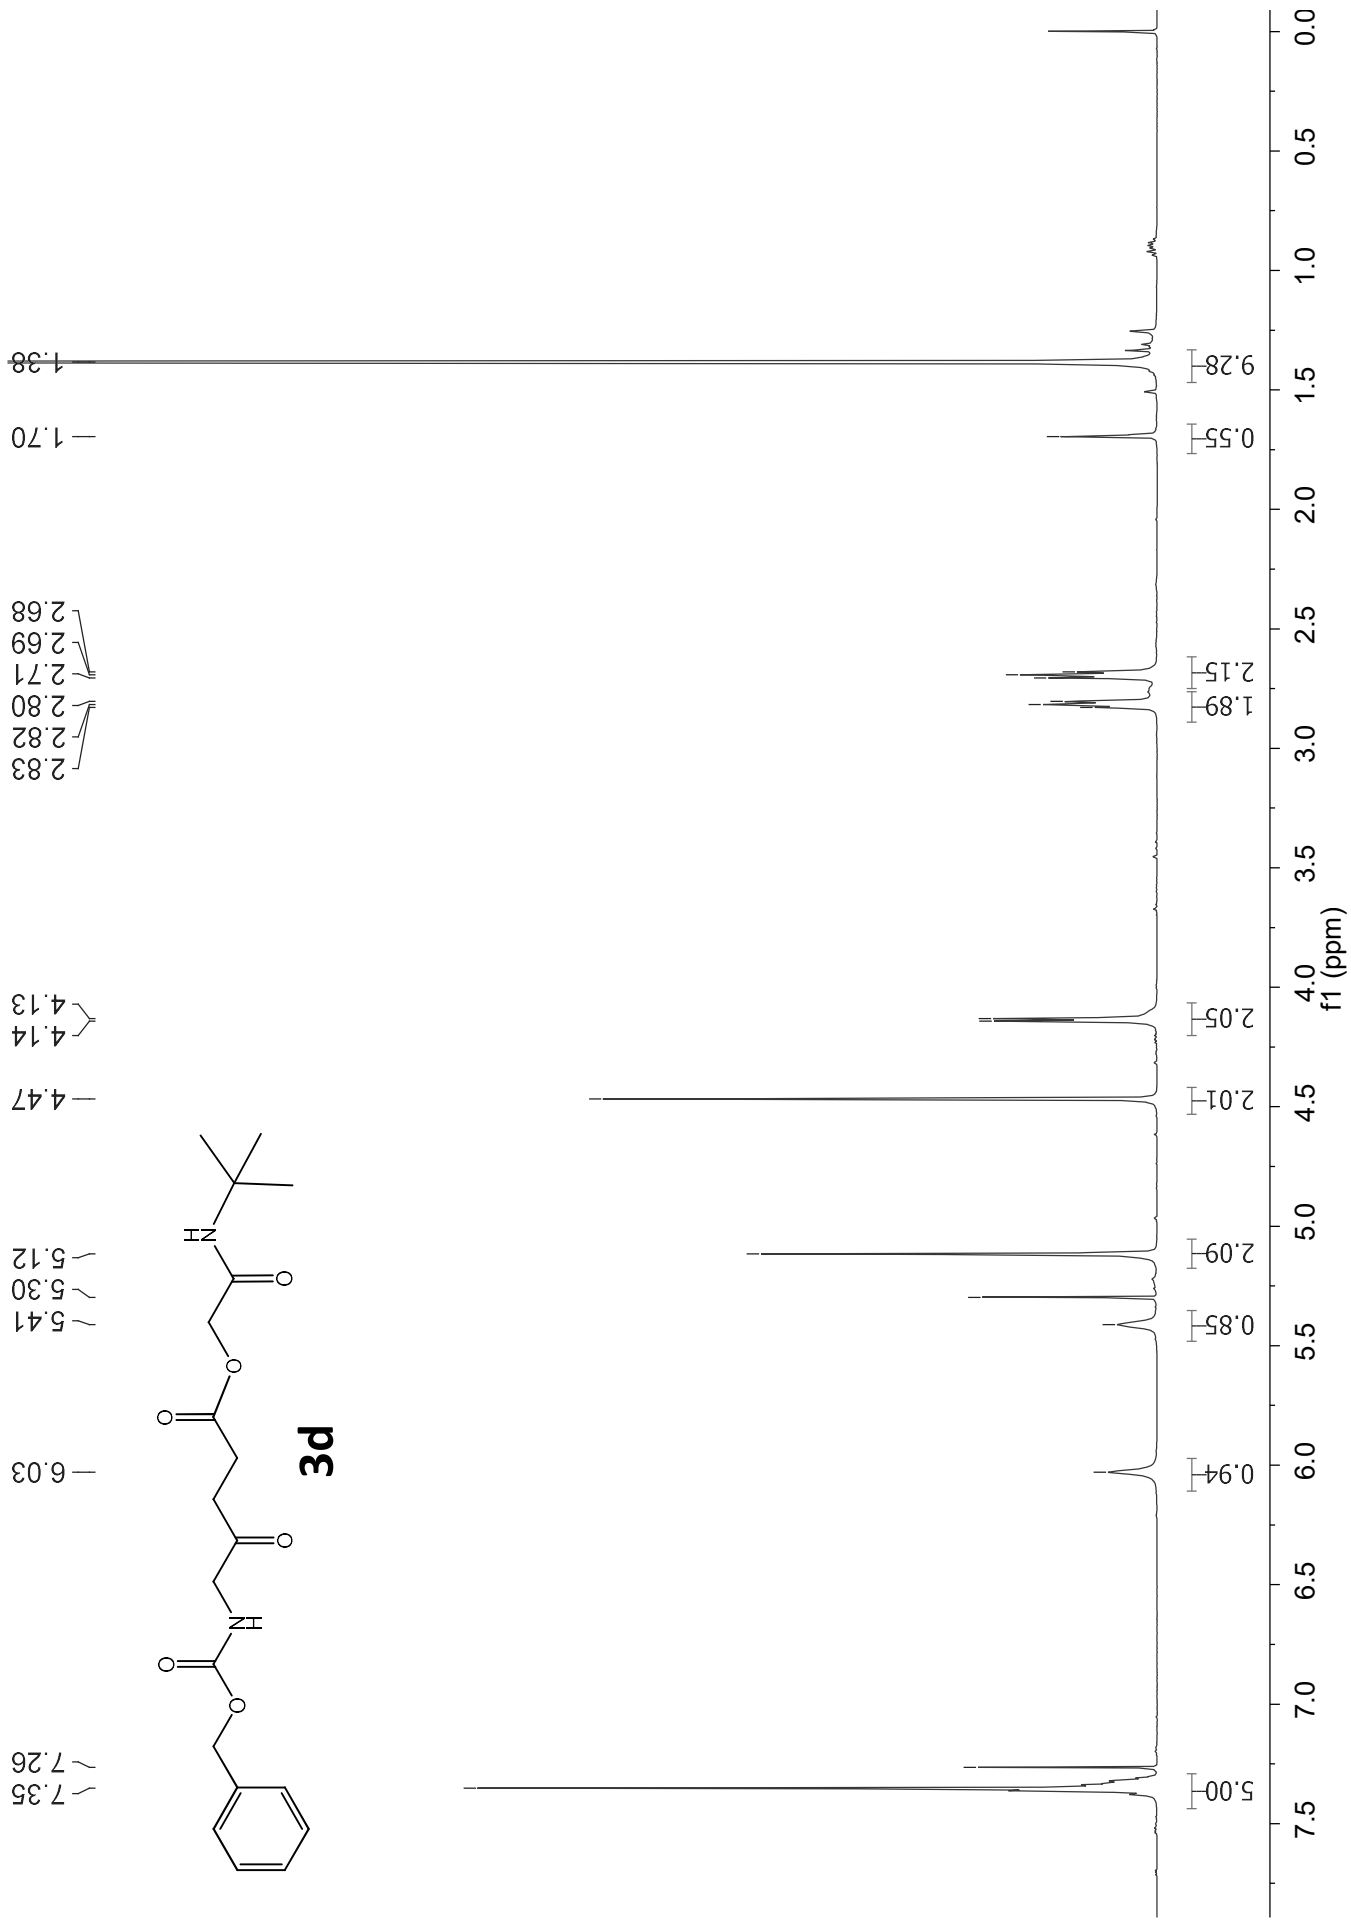



<sup>13</sup>C-NRM (125,7 MHz) of compound **3d**

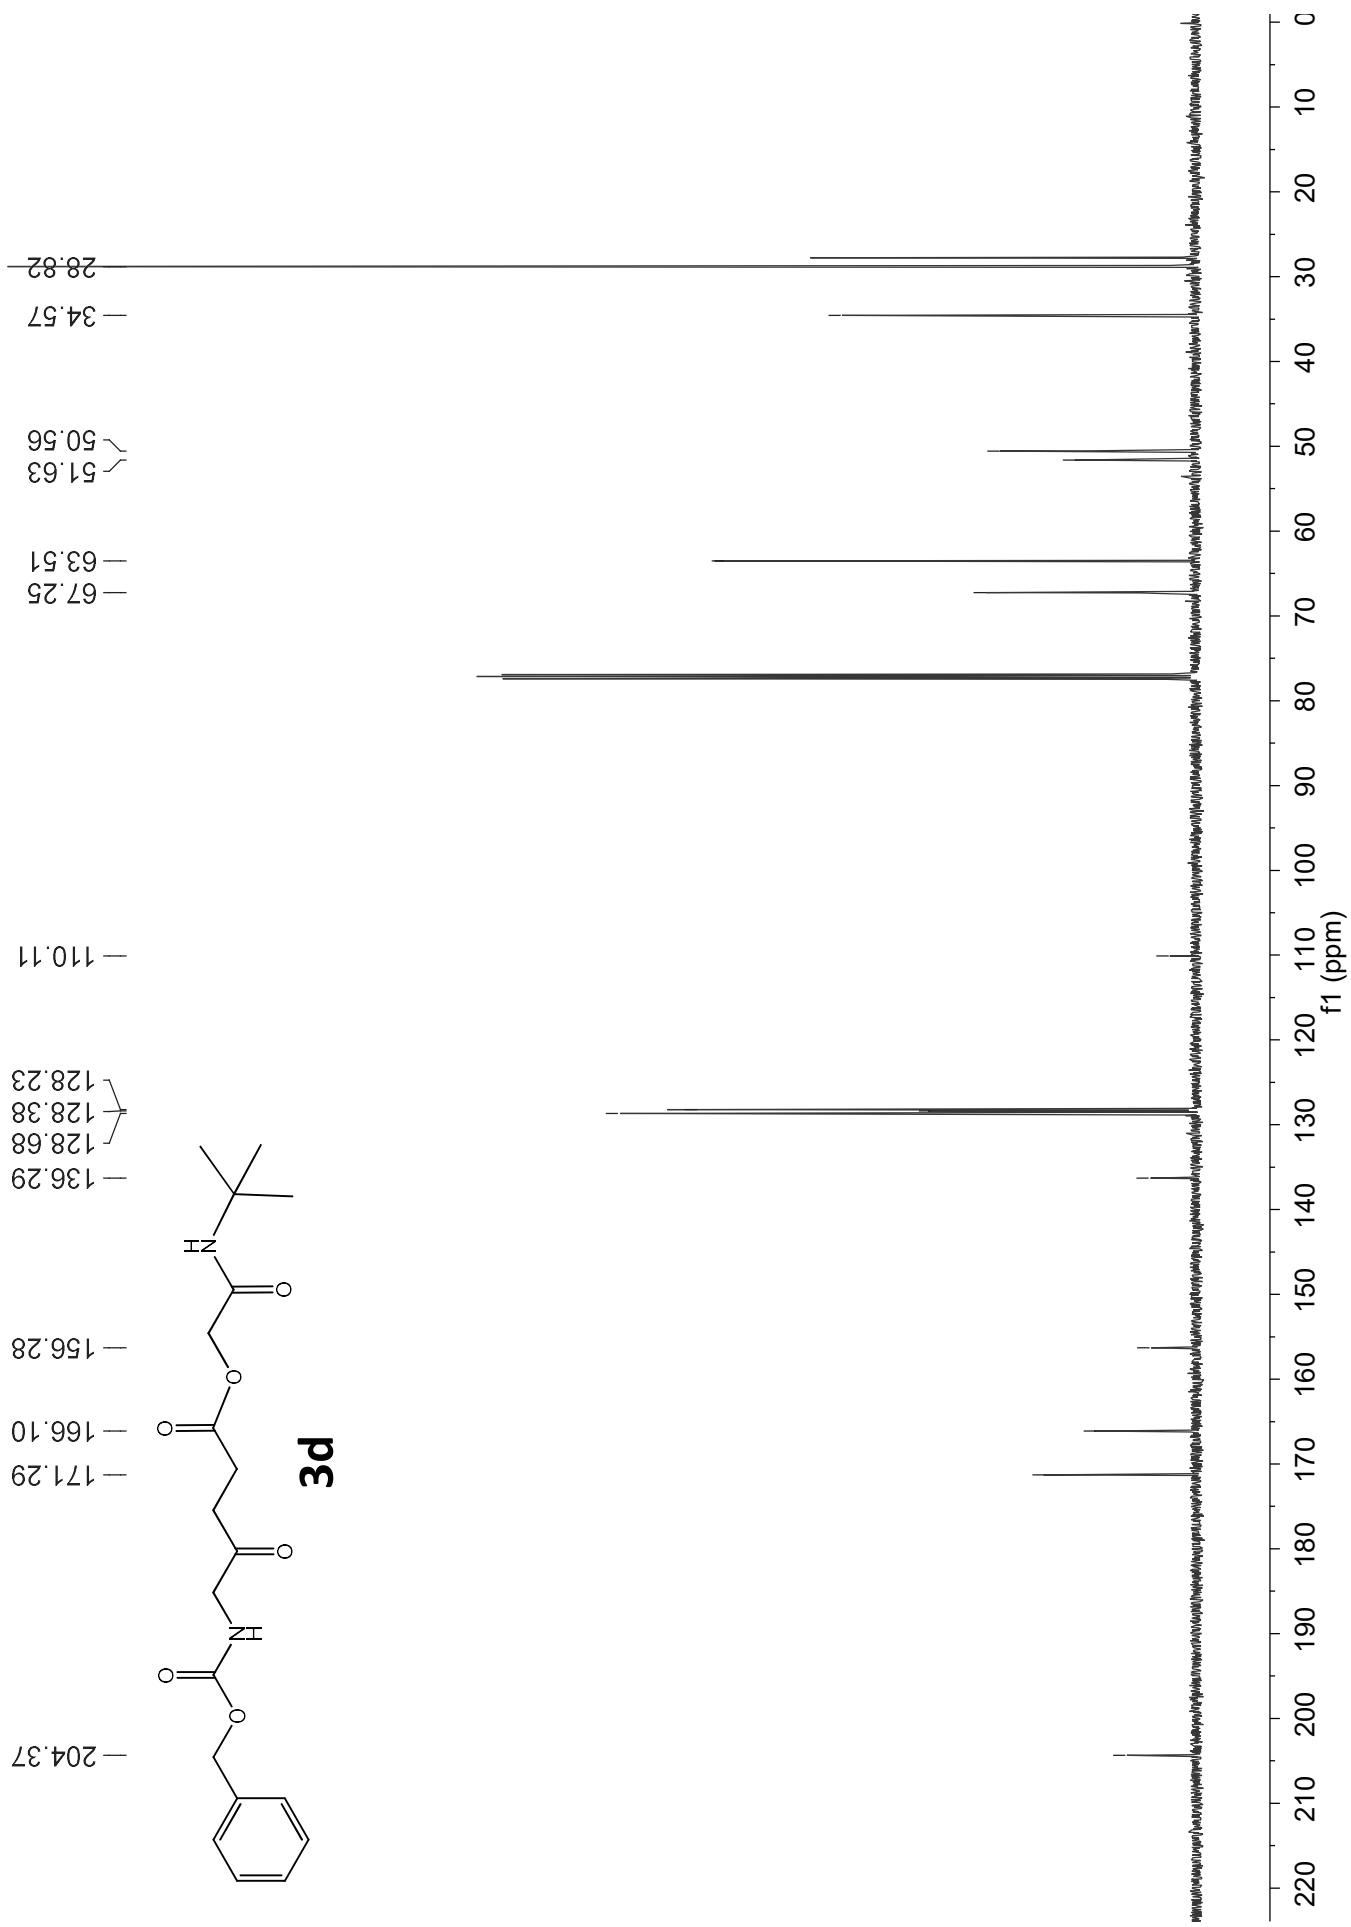

ESI MS/MS spectrum of m/z ([M+H]<sup>+</sup> cation of compound **3d** (collision Energy 10 eV)

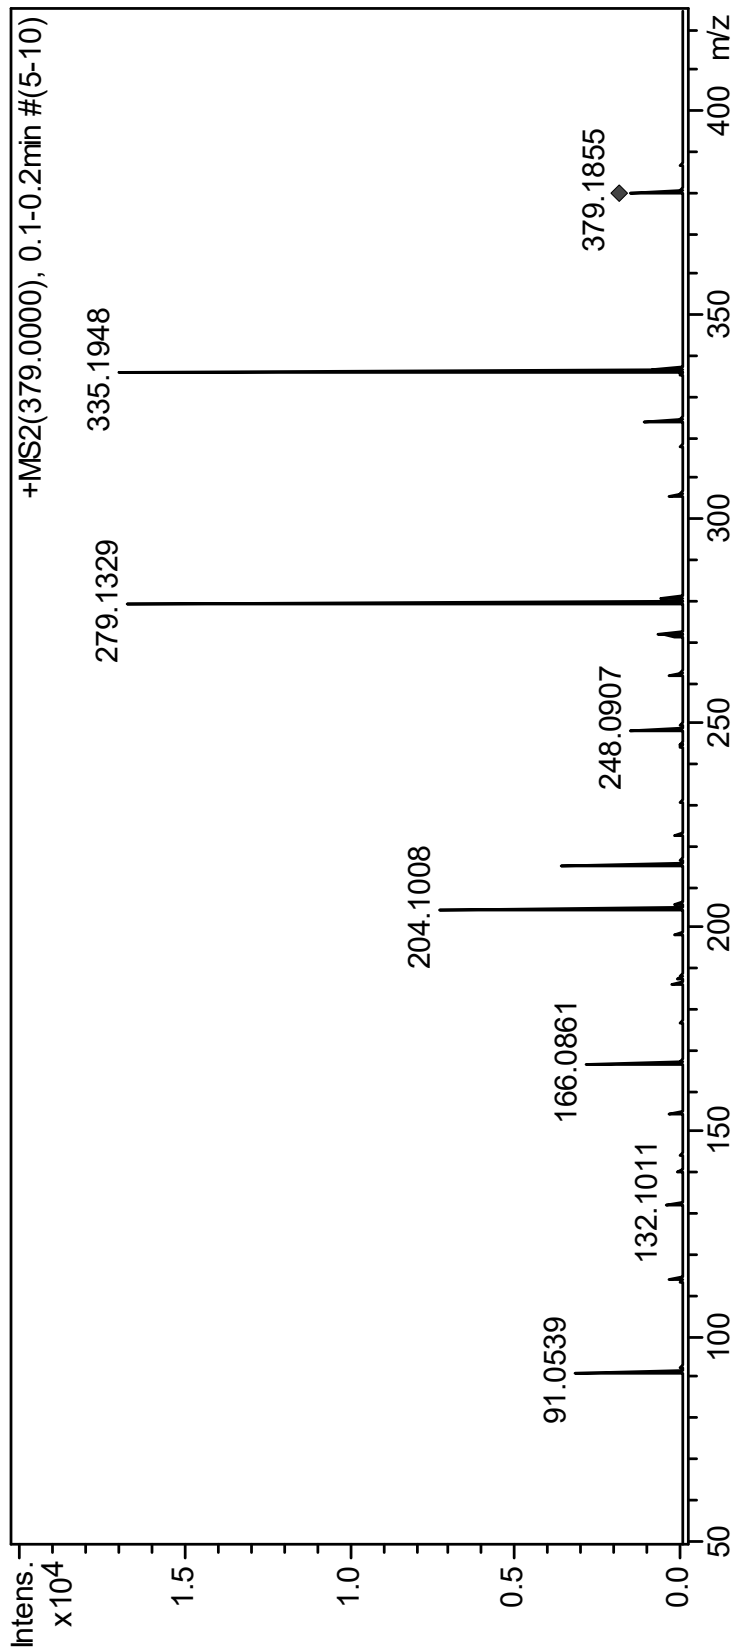

| Meas. m/z | Formula           | m/z      | err [ppm] | rdB | N-Rule e <sup>-</sup> Conf                              |
|-----------|-------------------|----------|-----------|-----|---------------------------------------------------------|
| 91.0539   | C 7 H 7           | 91.0542  | 3.9       | 4.5 | ok even trop <sup>+</sup>                               |
| 166.0861  | C 9 H 12 N O 2    | 166.0863 | 0.9       | 4.5 | ok even ruptura CO                                      |
| 204.1008  | C 12 H 14 N O 2   | 204.1019 | 204.1019  | 5.2 | 6.5 ok even id anteriores                               |
| 215.0652  | C 8 H 11 N 2 O 5  | 215.0662 | 215.0662  | 4.9 | 4.5 ok even [M+H-BnOH-propeno] <sup>+</sup>             |
| 279.1329  | C 14 H 19 N 2 O 4 | 279.1339 | 279.1339  | 3.6 | 6.5 ok even [M+H-CO <sub>2</sub> -propeno] <sup>+</sup> |
| 335.1948  | C 18 H 27 N 2 O 4 | 335.1965 | 335.1965  | 5.1 | 6.5 ok even [M+H-CO <sub>2</sub> ] <sup>+</sup>         |

<sup>1</sup>H-NRM (500 MHz) of compound 2-(cyclohexylamino)-2-oxoethyl-N-(benzyloxycarbonyl)-5-aminolevulinate (**3e**)

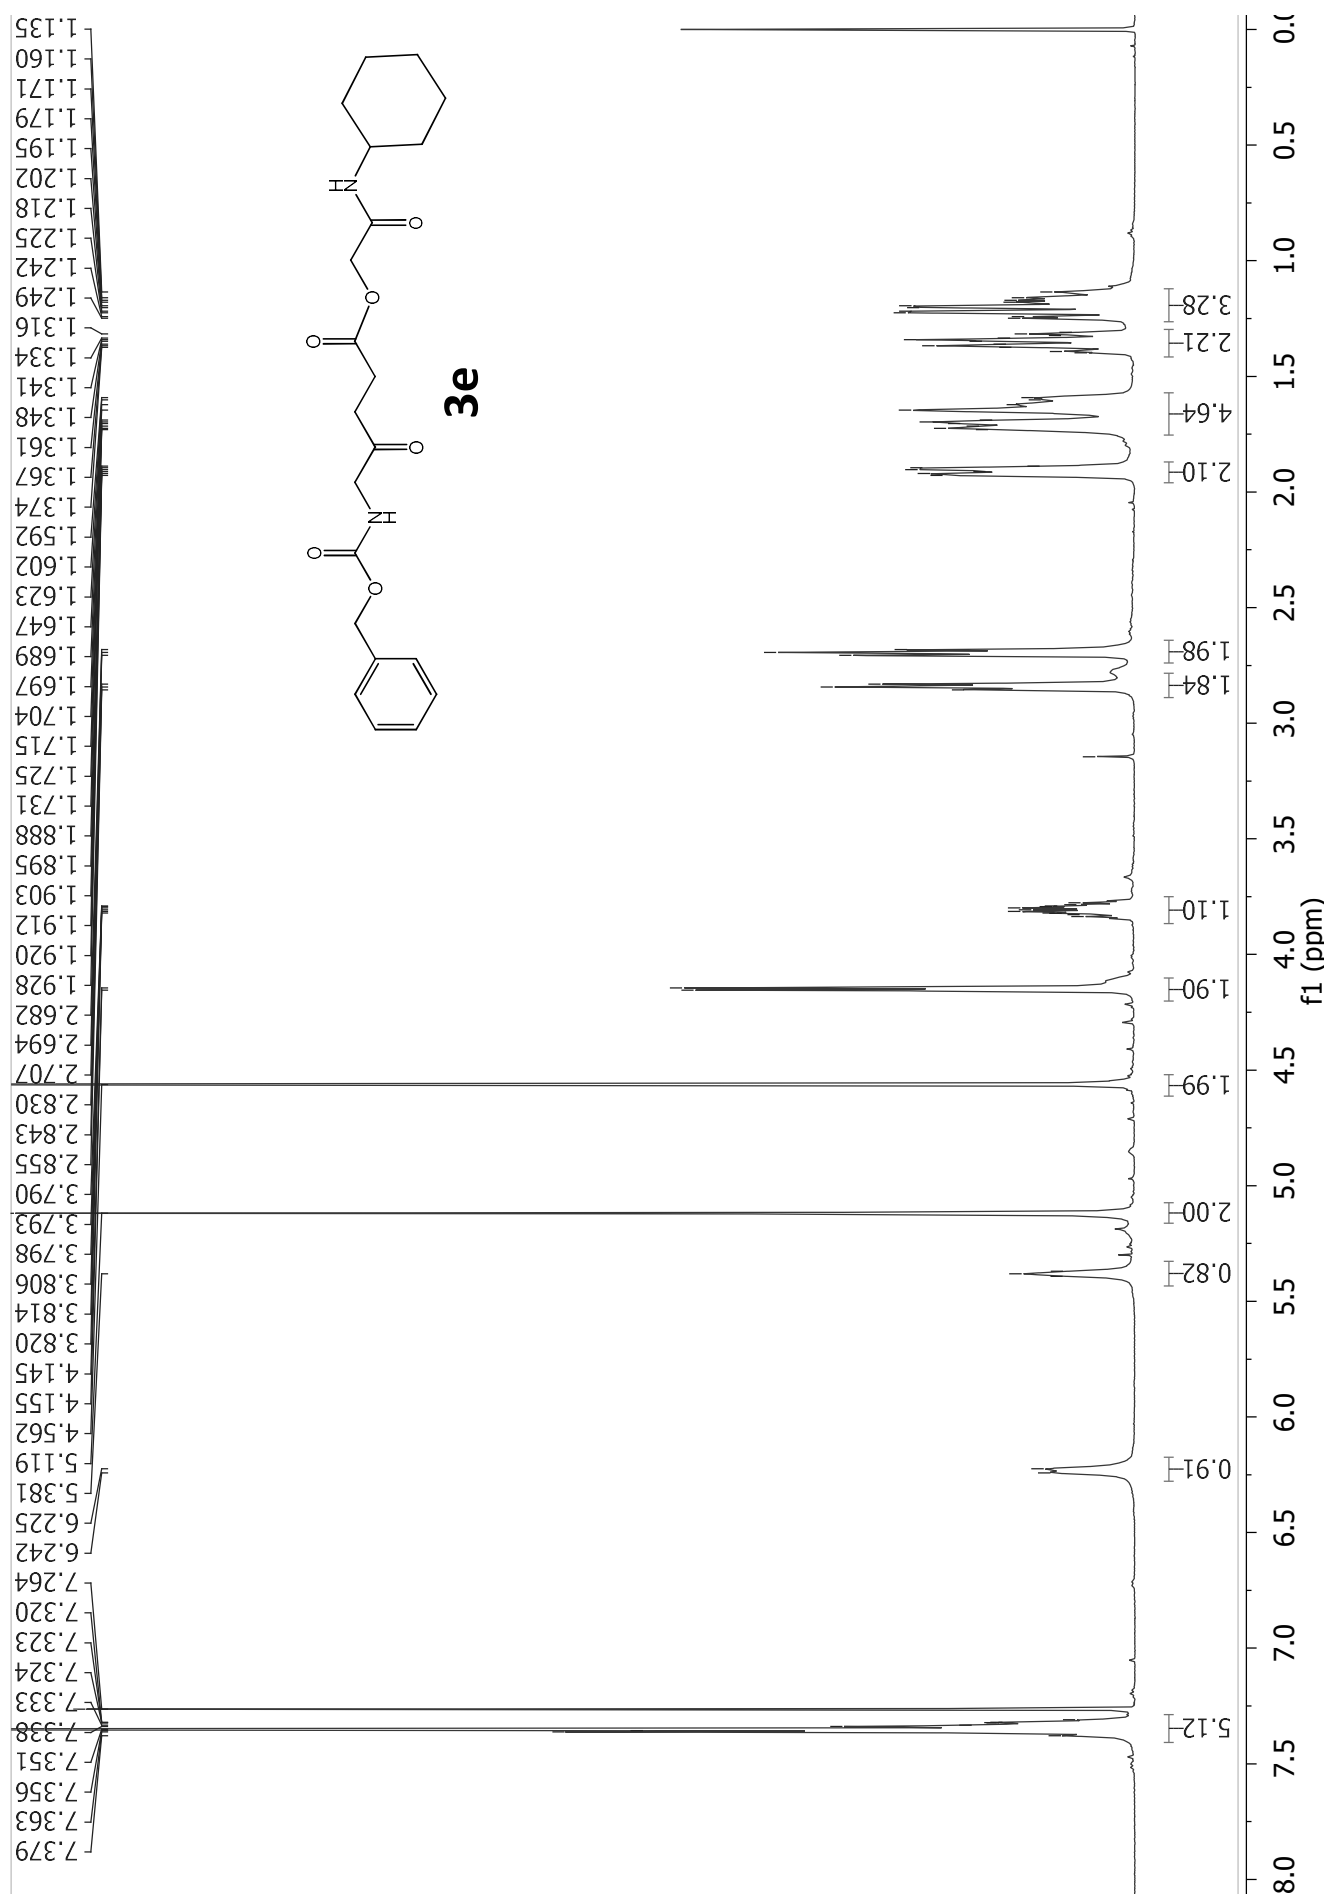

<sup>13</sup>C-NRM (50,3 MHz) of compound **3e**

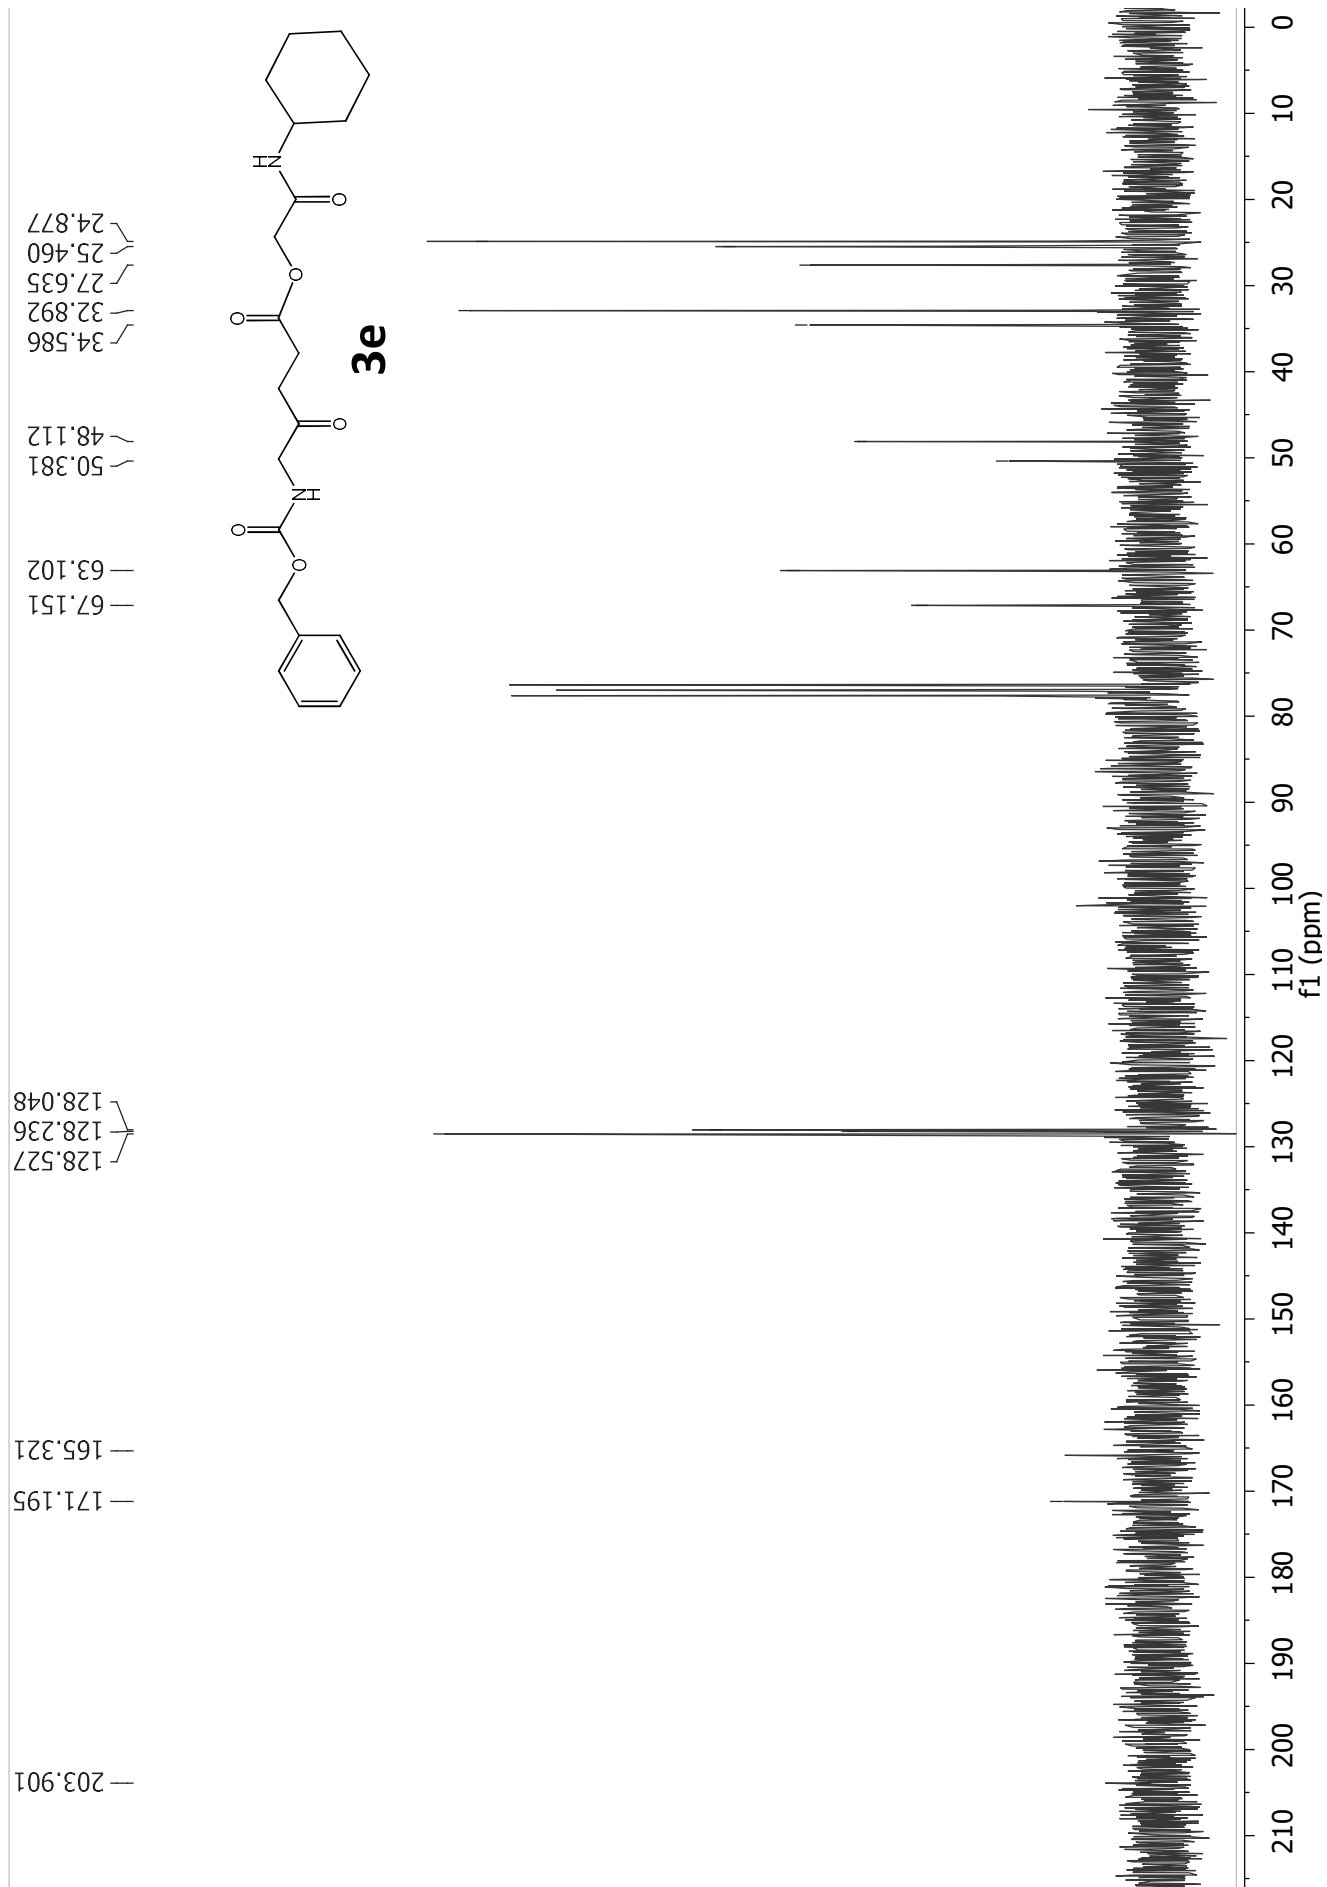

ESI MS/MS spectrum of m/z ([M+H]<sup>+</sup> cation of compound **3e** (collision Energy 10 eV)

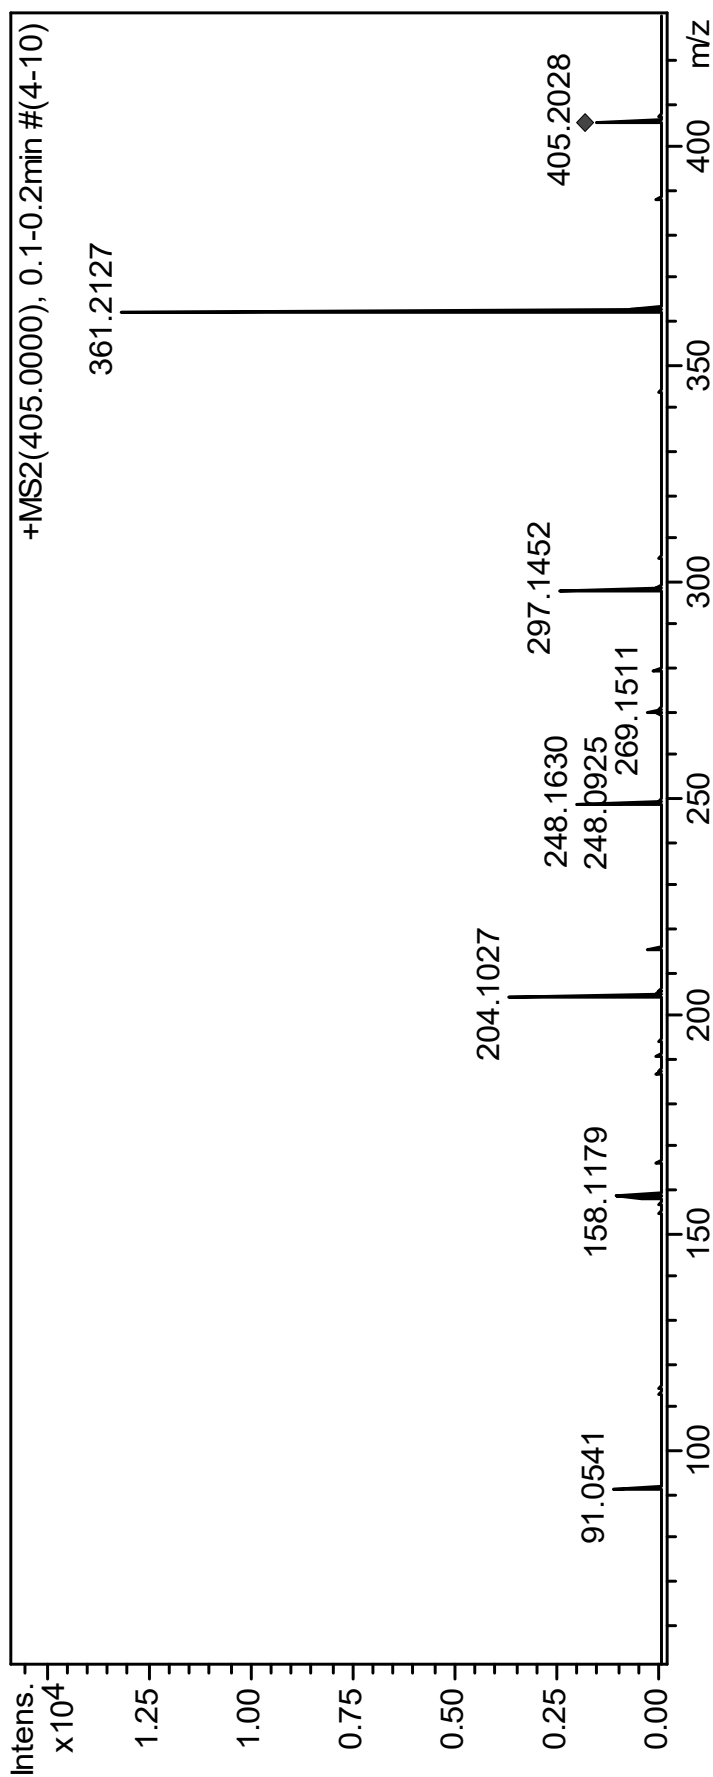

| Meas. m/z | Formula           | m/z      | err [ppm] | rdb | N-Rule e <sup>-</sup> Conf                  |
|-----------|-------------------|----------|-----------|-----|---------------------------------------------|
| 91.0541   | C 7 H 7           | 91.0542  | 1.3       | 4.5 | ok even trop <sup>+</sup>                   |
| 158.1179  | C 8 H 16 N O 2    | 158.1176 | -2.2      | 1.5 | ok even ruptura CO-O→                       |
| 204.1027  | C 12 H 14 N O 2   | 204.1019 | -4.1      | 6.5 | ok even m/z 248 - CO <sub>2</sub>           |
| 248.0925  | C 13 H 14 N O 4   | 248.0917 | 3.2       |     | ruptura CO-O←                               |
| 269.1511  | C 13 H 21 N 2 O 4 | 269.1496 | -5.8      | 4.5 | ok even [M+H-BnOH-CO] <sup>+</sup>          |
| 297.1452  | C 14 H 21 N 2 O 5 | 297.1445 | -2.4      | 5.5 | ok even [M+H-BnOH] <sup>+</sup>             |
| 361.2127  | C 20 H 29 N 2 O 4 | 361.2122 | -1.3      | 7.5 | ok even [M+H-CO <sub>2</sub> ] <sup>+</sup> |
| 405.2028  | C 21 H 29 N 2 O 6 | 405.2020 | -1.9      | 8.5 | ok even [M+H] <sup>+</sup>                  |

<sup>1</sup>H-NRM (500 MHz) of compound 2-((4-fluorophenyl)amino)-2-oxoethyl-N-(benzyloxycarbonyl)-5-aminolevulinatate (**3f**)

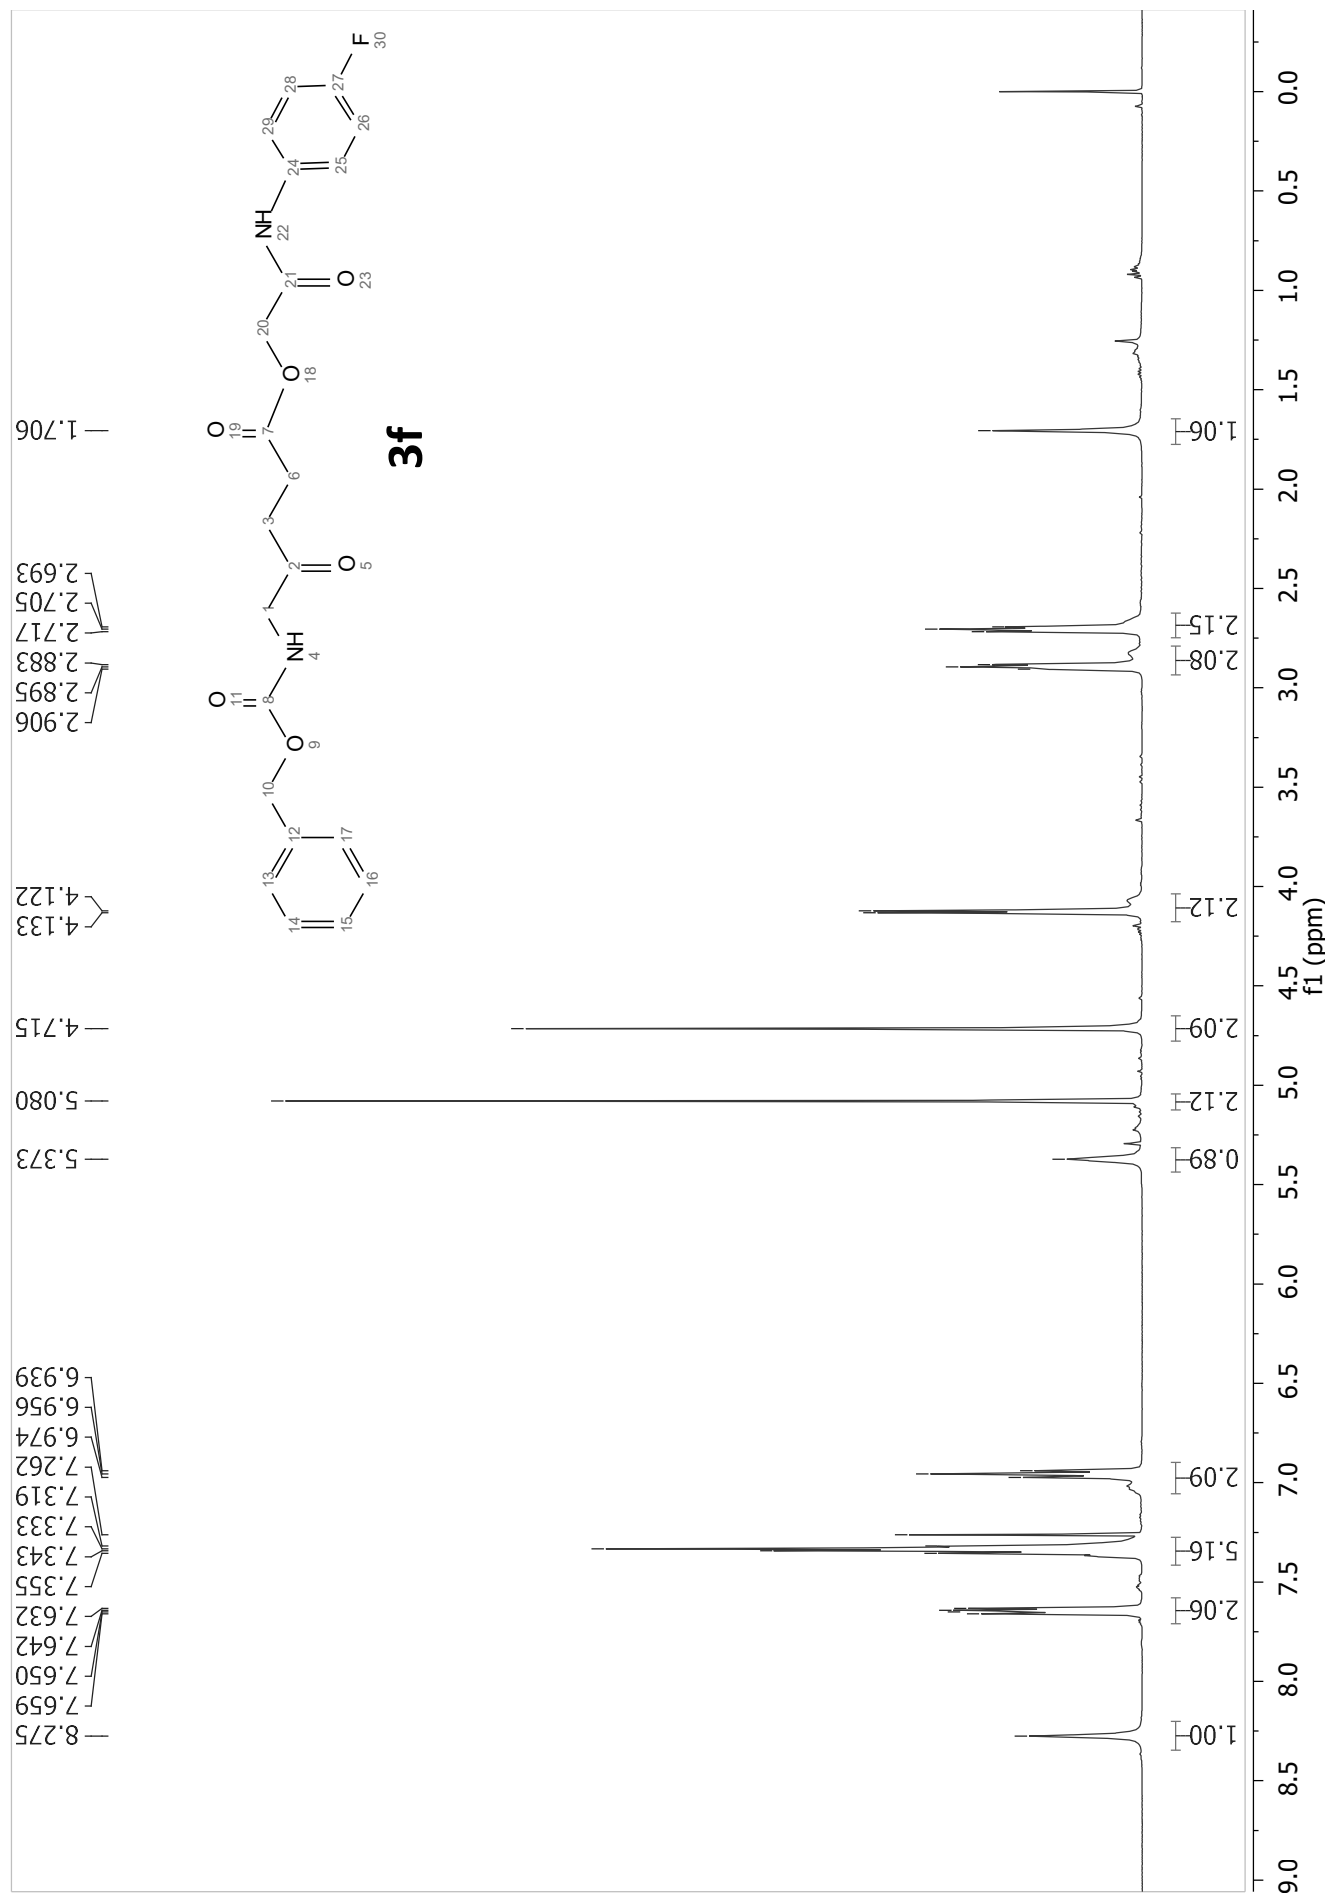

<sup>13</sup>C-NRM (125,7 MHz) of compound **3f**

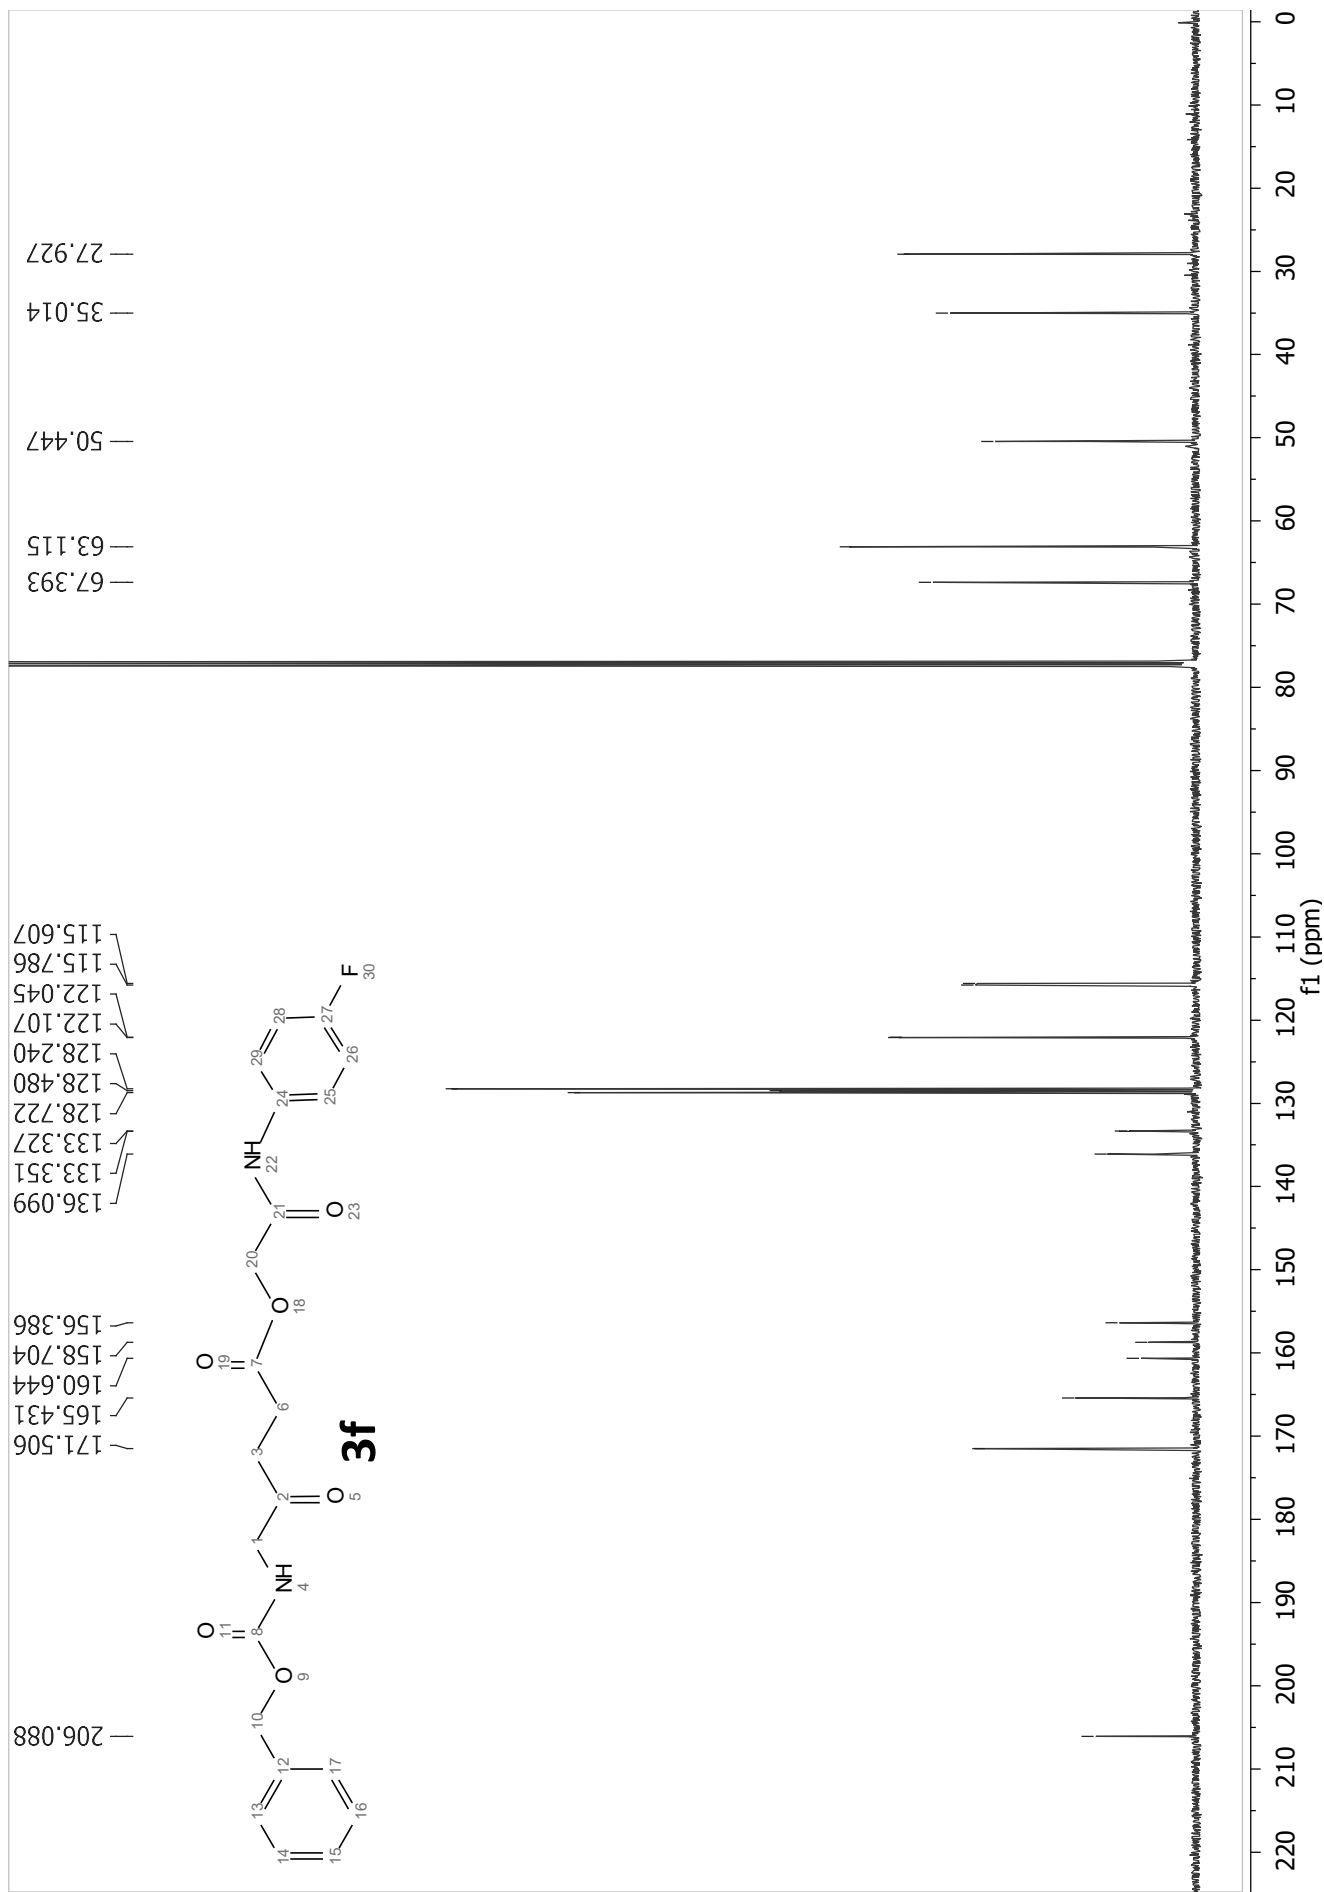

ESI MS/MS spectrum of m/z ([M+H]<sup>+</sup> cation of compound **3f** (collision Energy 10 eV)

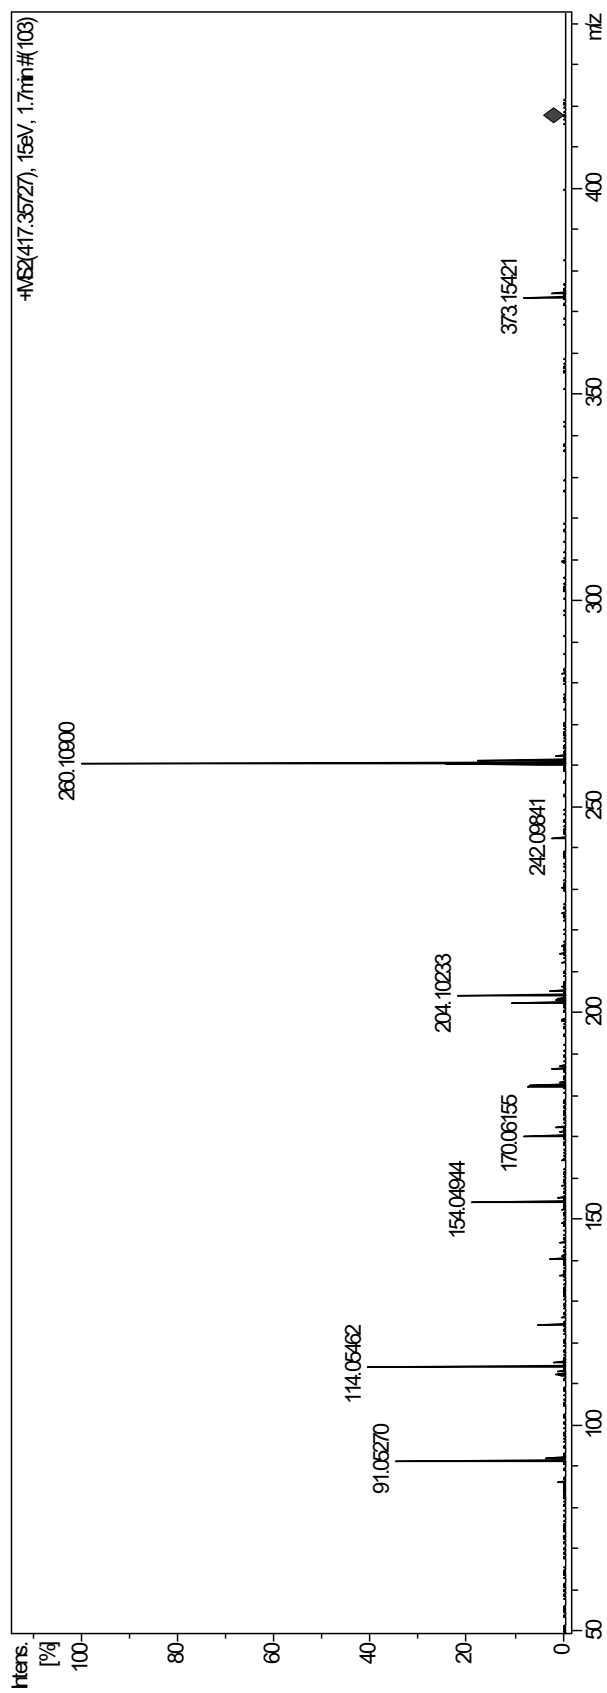

| Obs. m/z | Formula                                                        | m/z       | err [ppm] | rdB | N-Rule <sup>e-</sup> Conf |
|----------|----------------------------------------------------------------|-----------|-----------|-----|---------------------------|
| 4.05462  | C <sub>5</sub> H <sub>8</sub> NO <sub>2</sub>                  | 114.05495 | 3.0       | 2.5 | ok even                   |
| 4.04944  | C <sub>7</sub> H <sub>8</sub> NO <sub>3</sub>                  | 154.04987 | 2.8       | 4.5 | ok even                   |
| 4.10233  | C <sub>12</sub> H <sub>14</sub> NO <sub>2</sub>                | 204.10191 | -2.1      | 6.5 | ok even id ant            |
| 3.10900  | C <sub>15</sub> H <sub>15</sub> FN <sub>2</sub> O <sub>2</sub> | 260.10813 | -3.3      | 8.5 | ok even                   |



<sup>1</sup>H-NRM (500 MHz) for compound 2-(4-tolylamino)-2-oxoethyl-N-(benzyloxycarbonyl)-5-aminolevulinatate (**3g**)

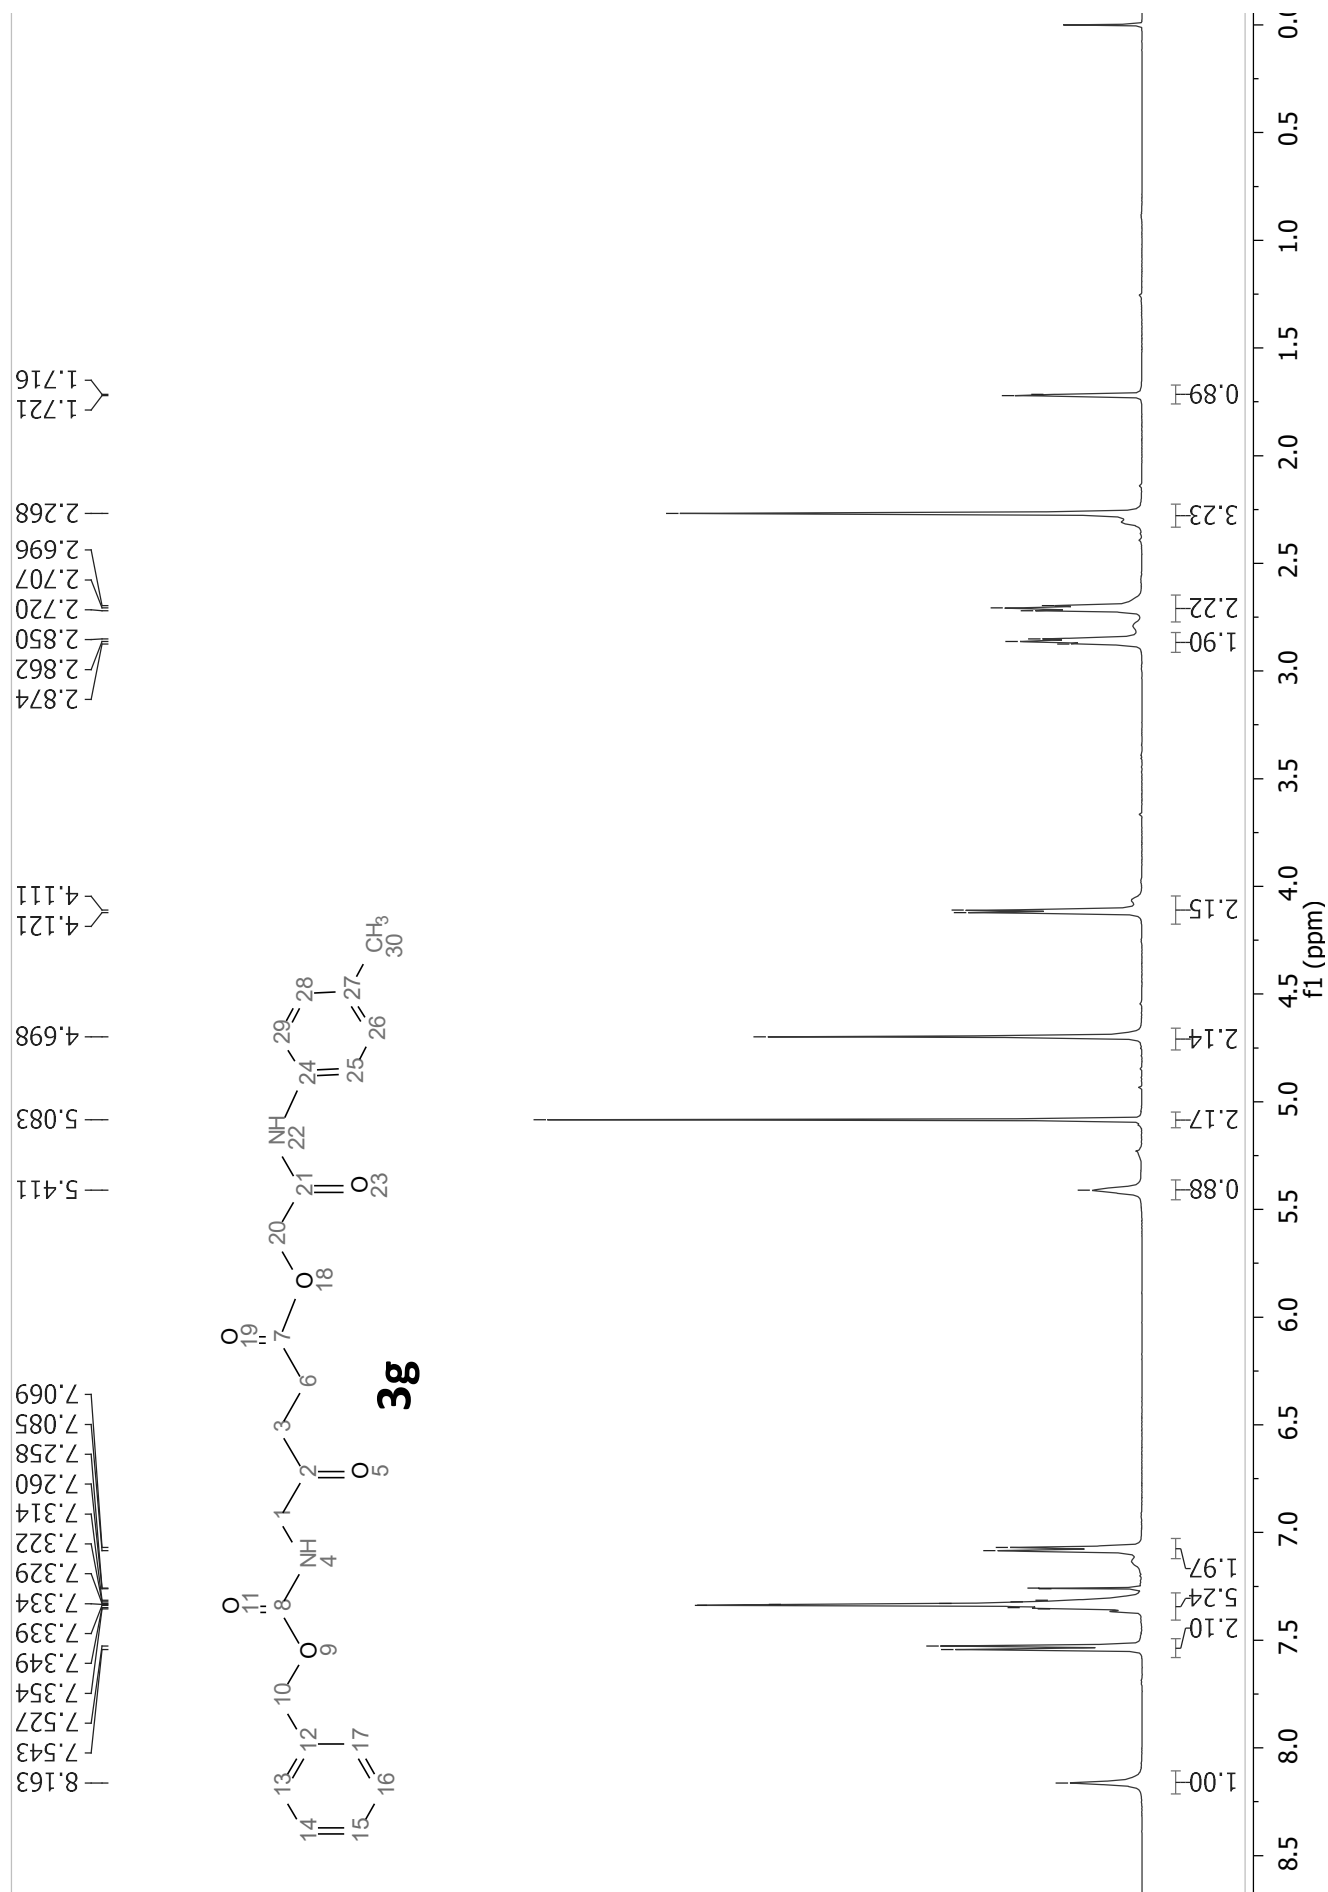

<sup>13</sup>C-NRM (125,7 MHz) of compound **3g**

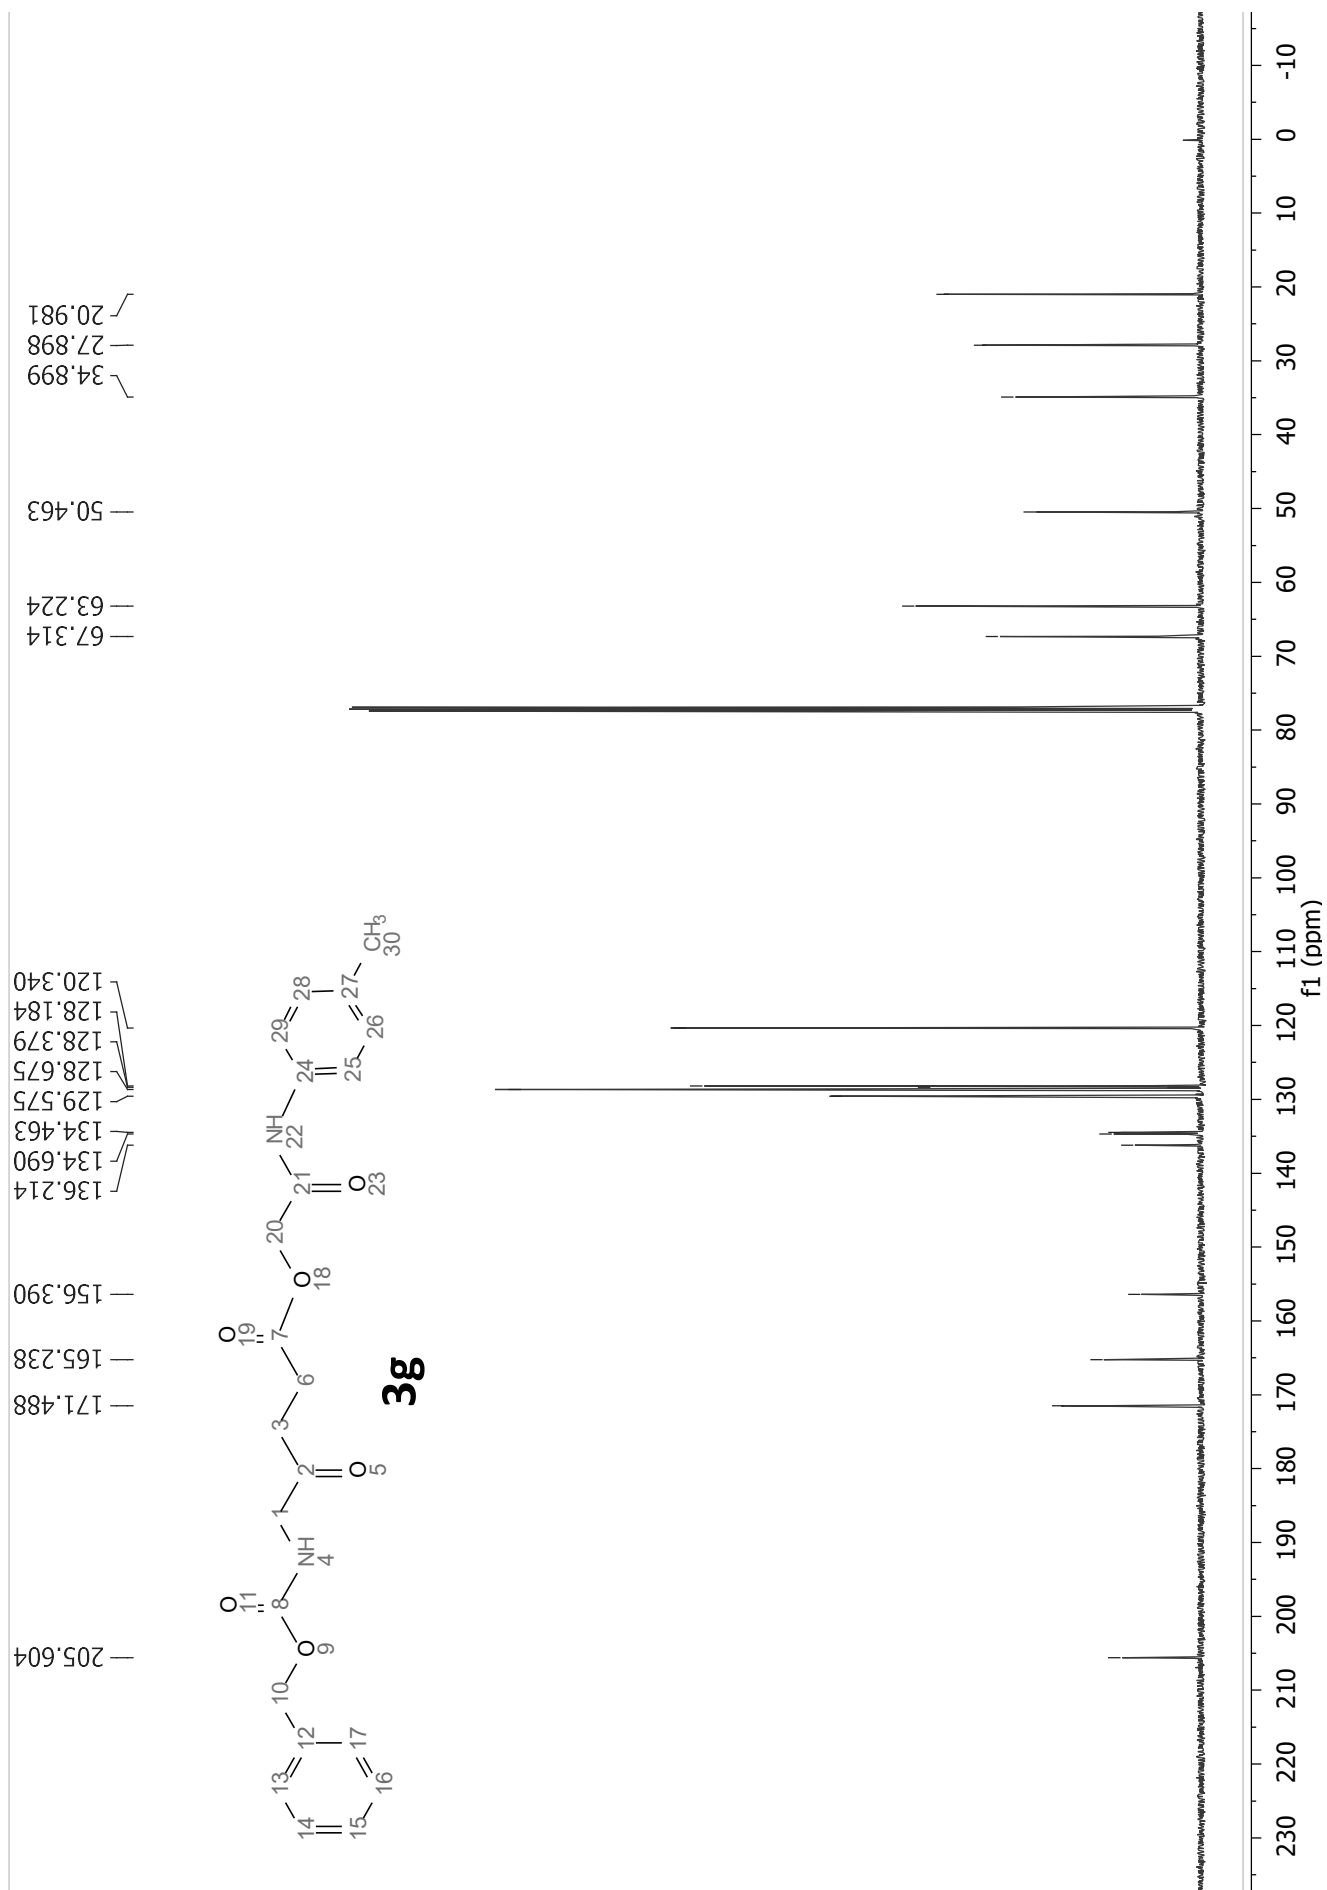

COSY (500 MHz) of compound **3g**

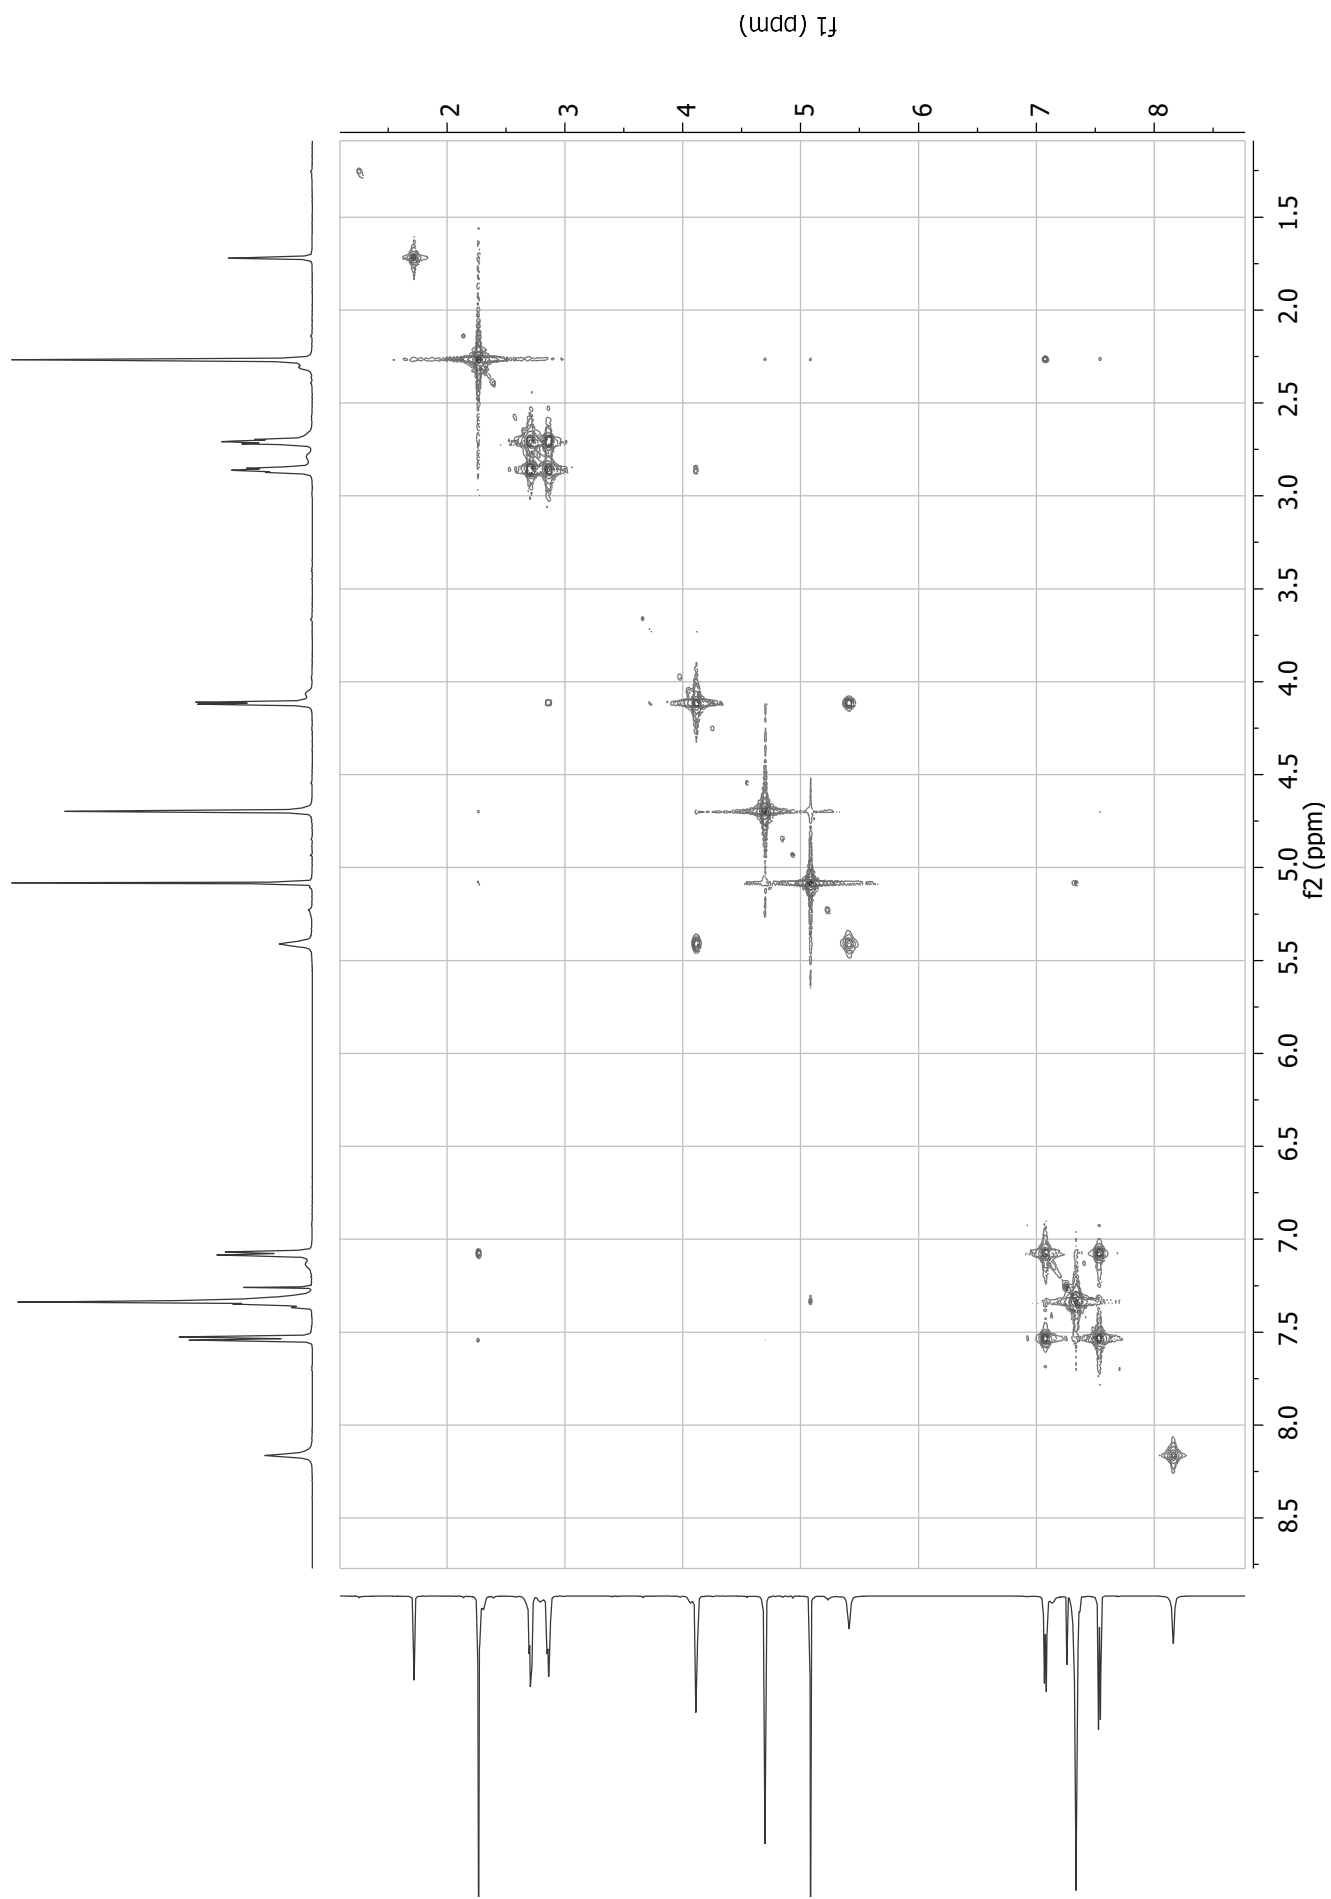

HMBC (500 MHz) of compound **3g**

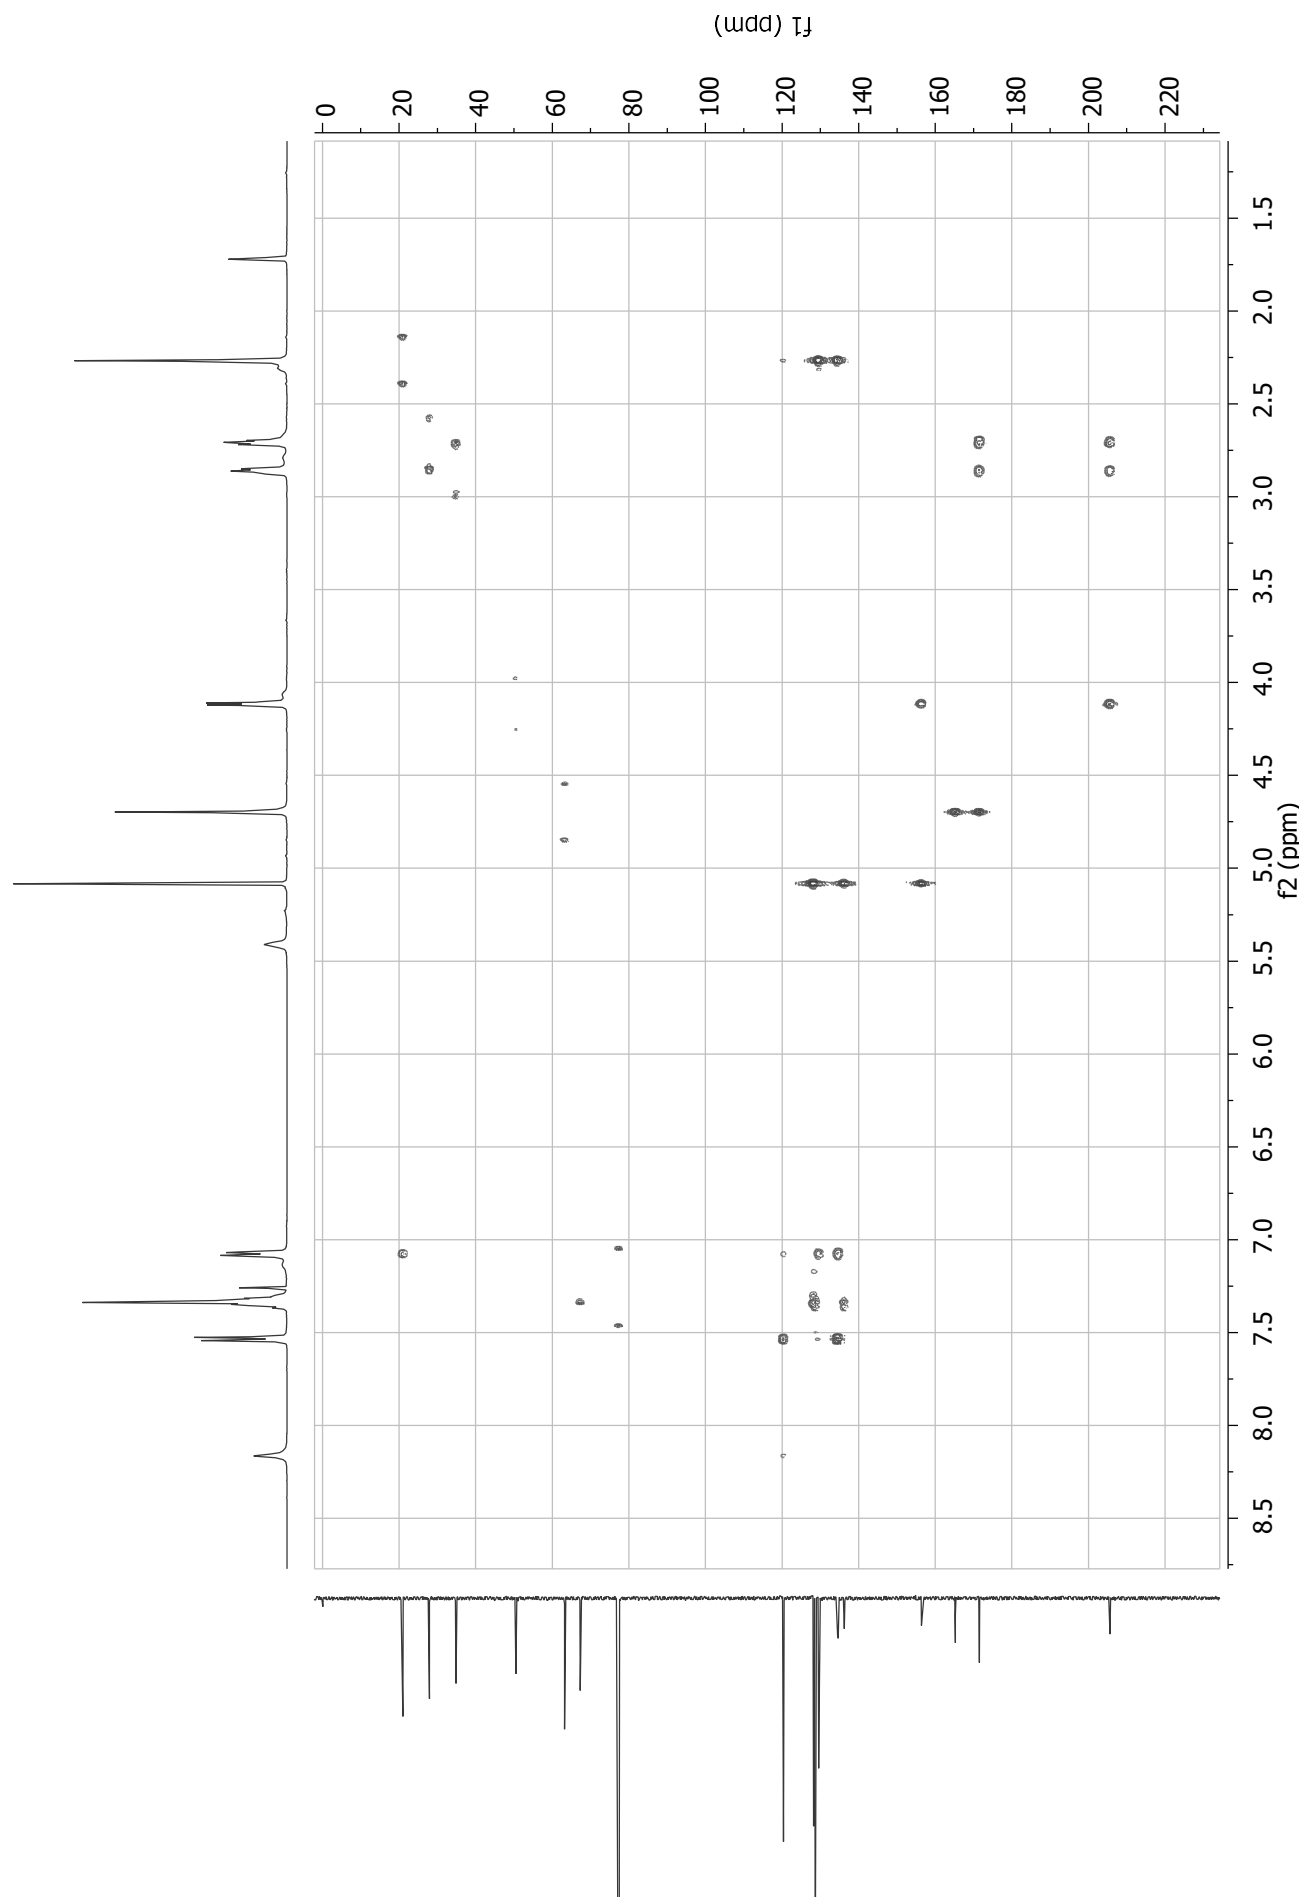

# ESI MS/MS spectrum of m/z ([M+H]<sup>+</sup> cation of compound **3g** (collision Energy 10 eV)

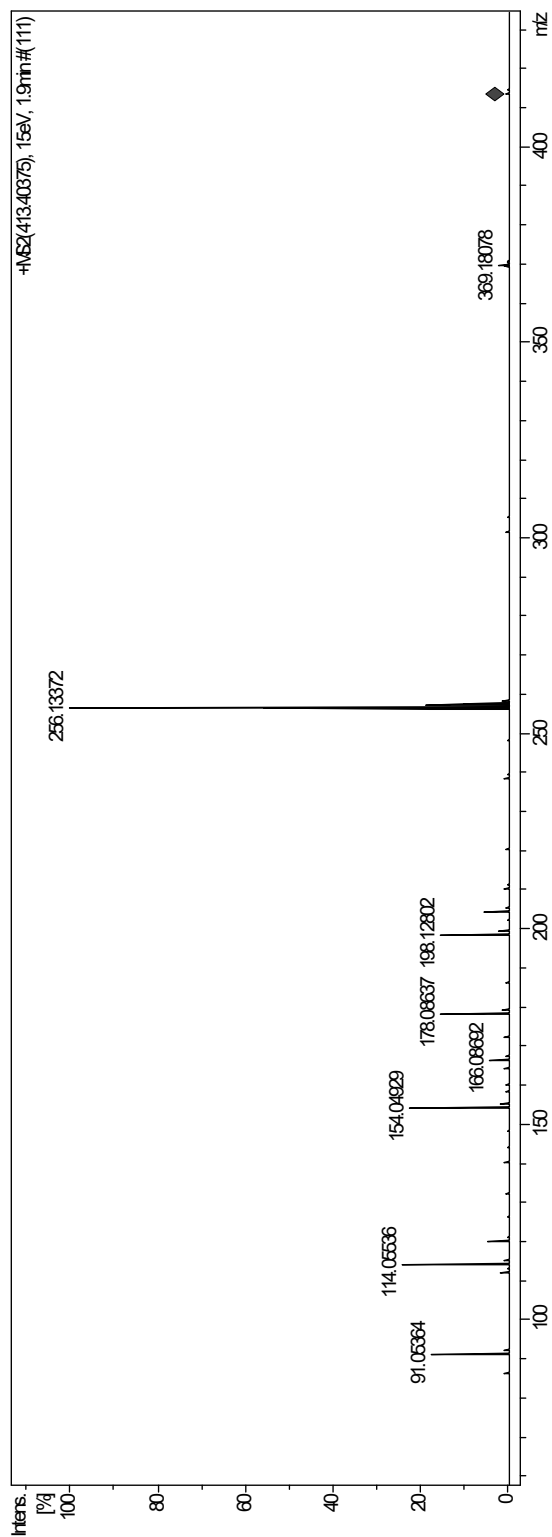

| Meas. m/z | Formula           | m/z       | err [ppm] | rdb  | N-Rule <sup>-</sup> Conf |
|-----------|-------------------|-----------|-----------|------|--------------------------|
| 91.05364  | C 7 H 7           | 91.05423  | 6.4       | 4.5  | ok even                  |
| 114.05536 | C 5 H 8 N O 2     | 114.05495 | -3.5      | 2.5  | ok even                  |
| 154.04929 | C 7 H 8 N O 3     | 154.04987 | 3.8       | 4.5  | ok even X                |
| 166.08692 | C 9 H 12 N O 2    | 166.08626 | -4.0      | 4.5  | ok even α-O Cterm        |
| 178.08637 | C 10 H 12 N O 2   | 178.08626 | -0.6      | 5.5  | ok even                  |
| 198.12802 | C 14 H 16 N       | 198.12773 | -1.5      | 7.5  | ok even                  |
| 204.10108 | C 12 H 14 N O 2   | 204.10191 | 4.0       | 6.5  | ok even 369-165          |
| 256.13372 | C 16 H 18 N O 2   | 256.13321 | -2.0      | 8.5  | ok even 369-113          |
| 369.18078 | C 21 H 25 N 2 O 4 | 369.18088 | 0.3       | 10.5 | ok even -CO2             |

<sup>1</sup>H-NRM (500 MHz) of compound 2-((2-(trifluoromethyl)phenyl)amino)-2-oxoethyl-N-(benzyloxycarbonyl)-5-aminolevulinatate (**3h**)

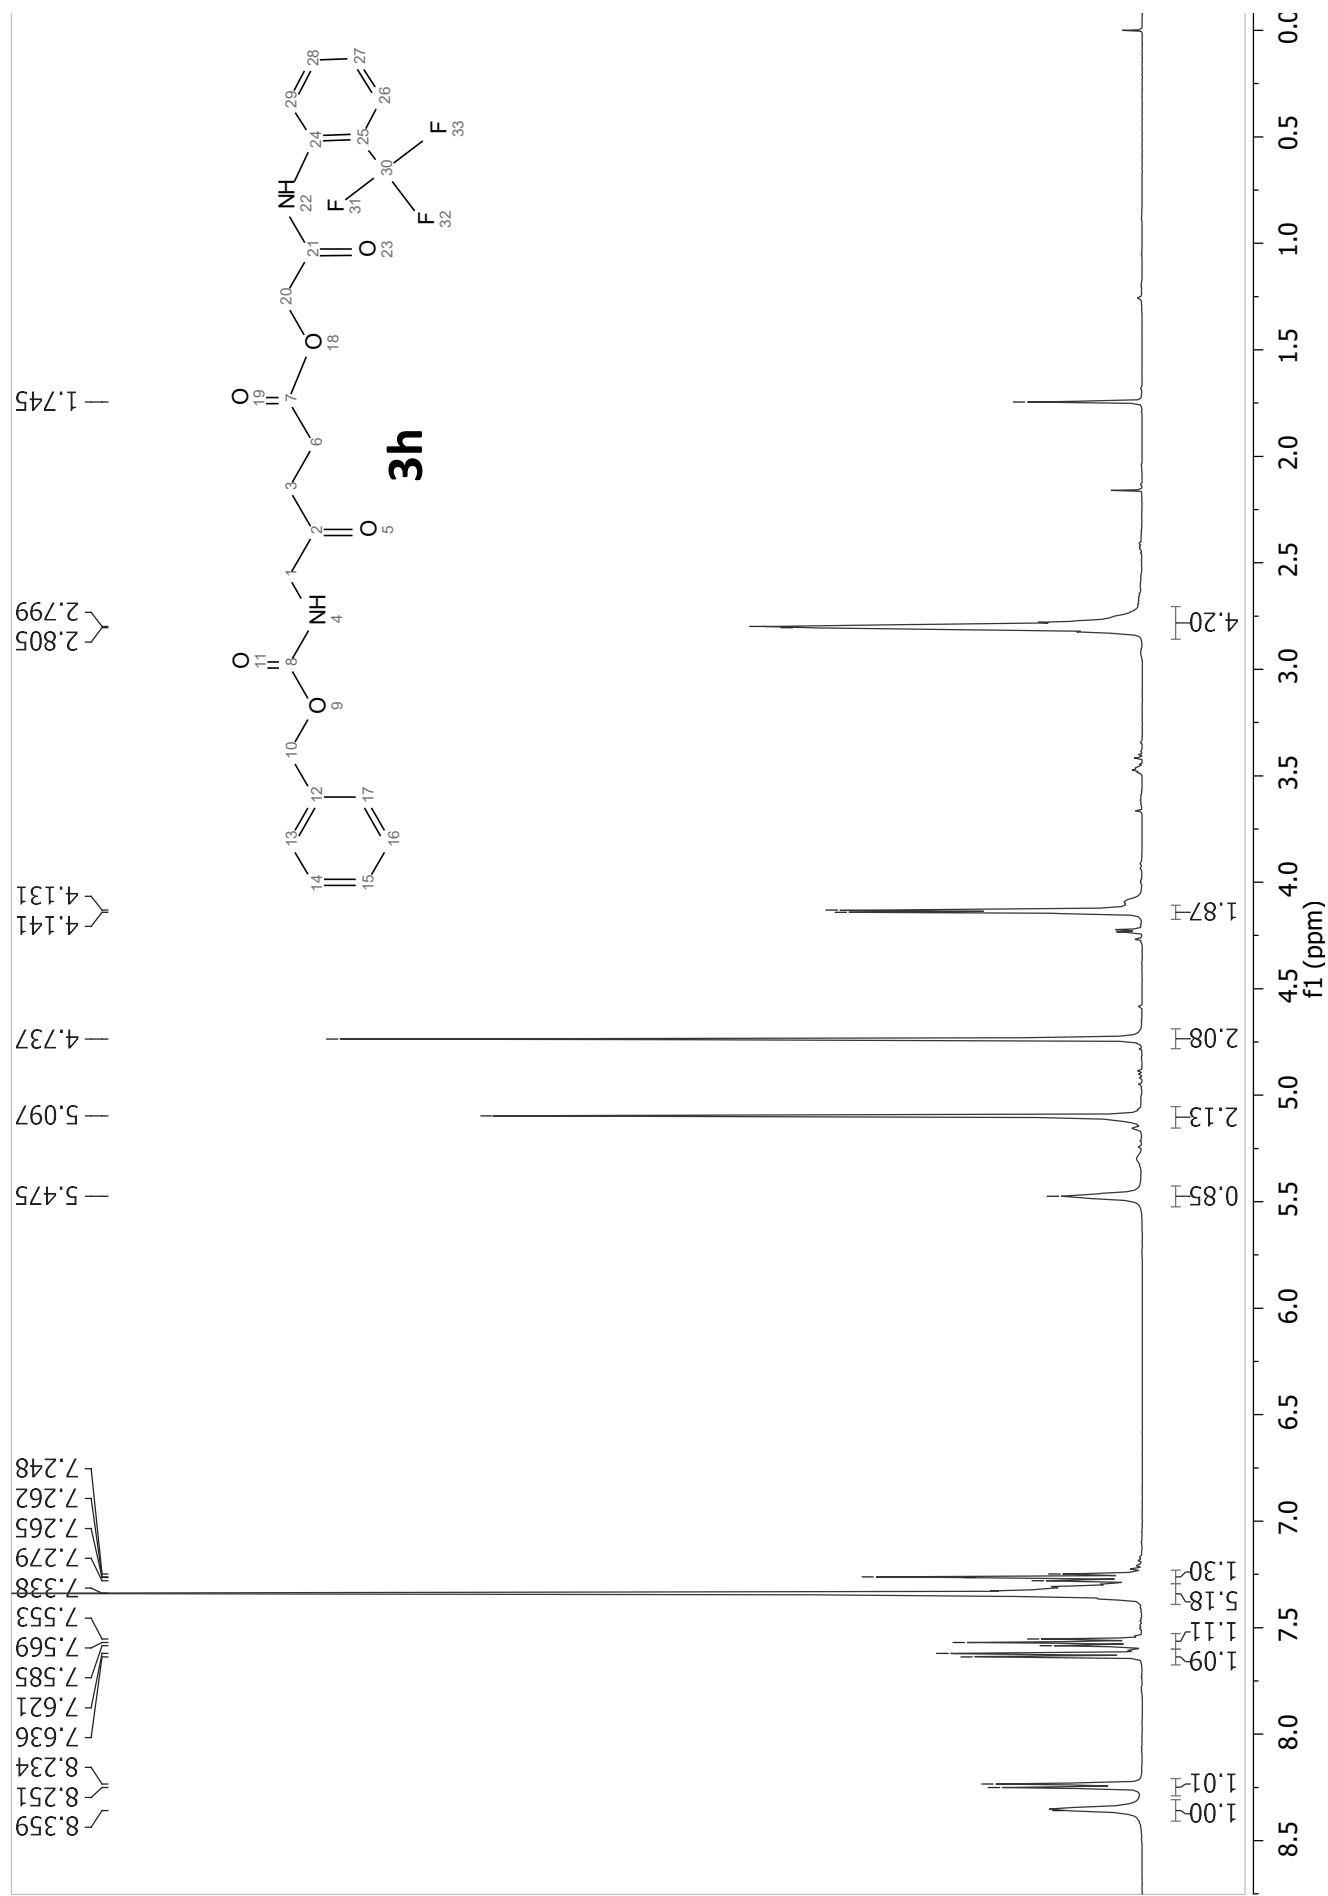

<sup>13</sup>C-NRM (125,7 MHz) of compound **3h**

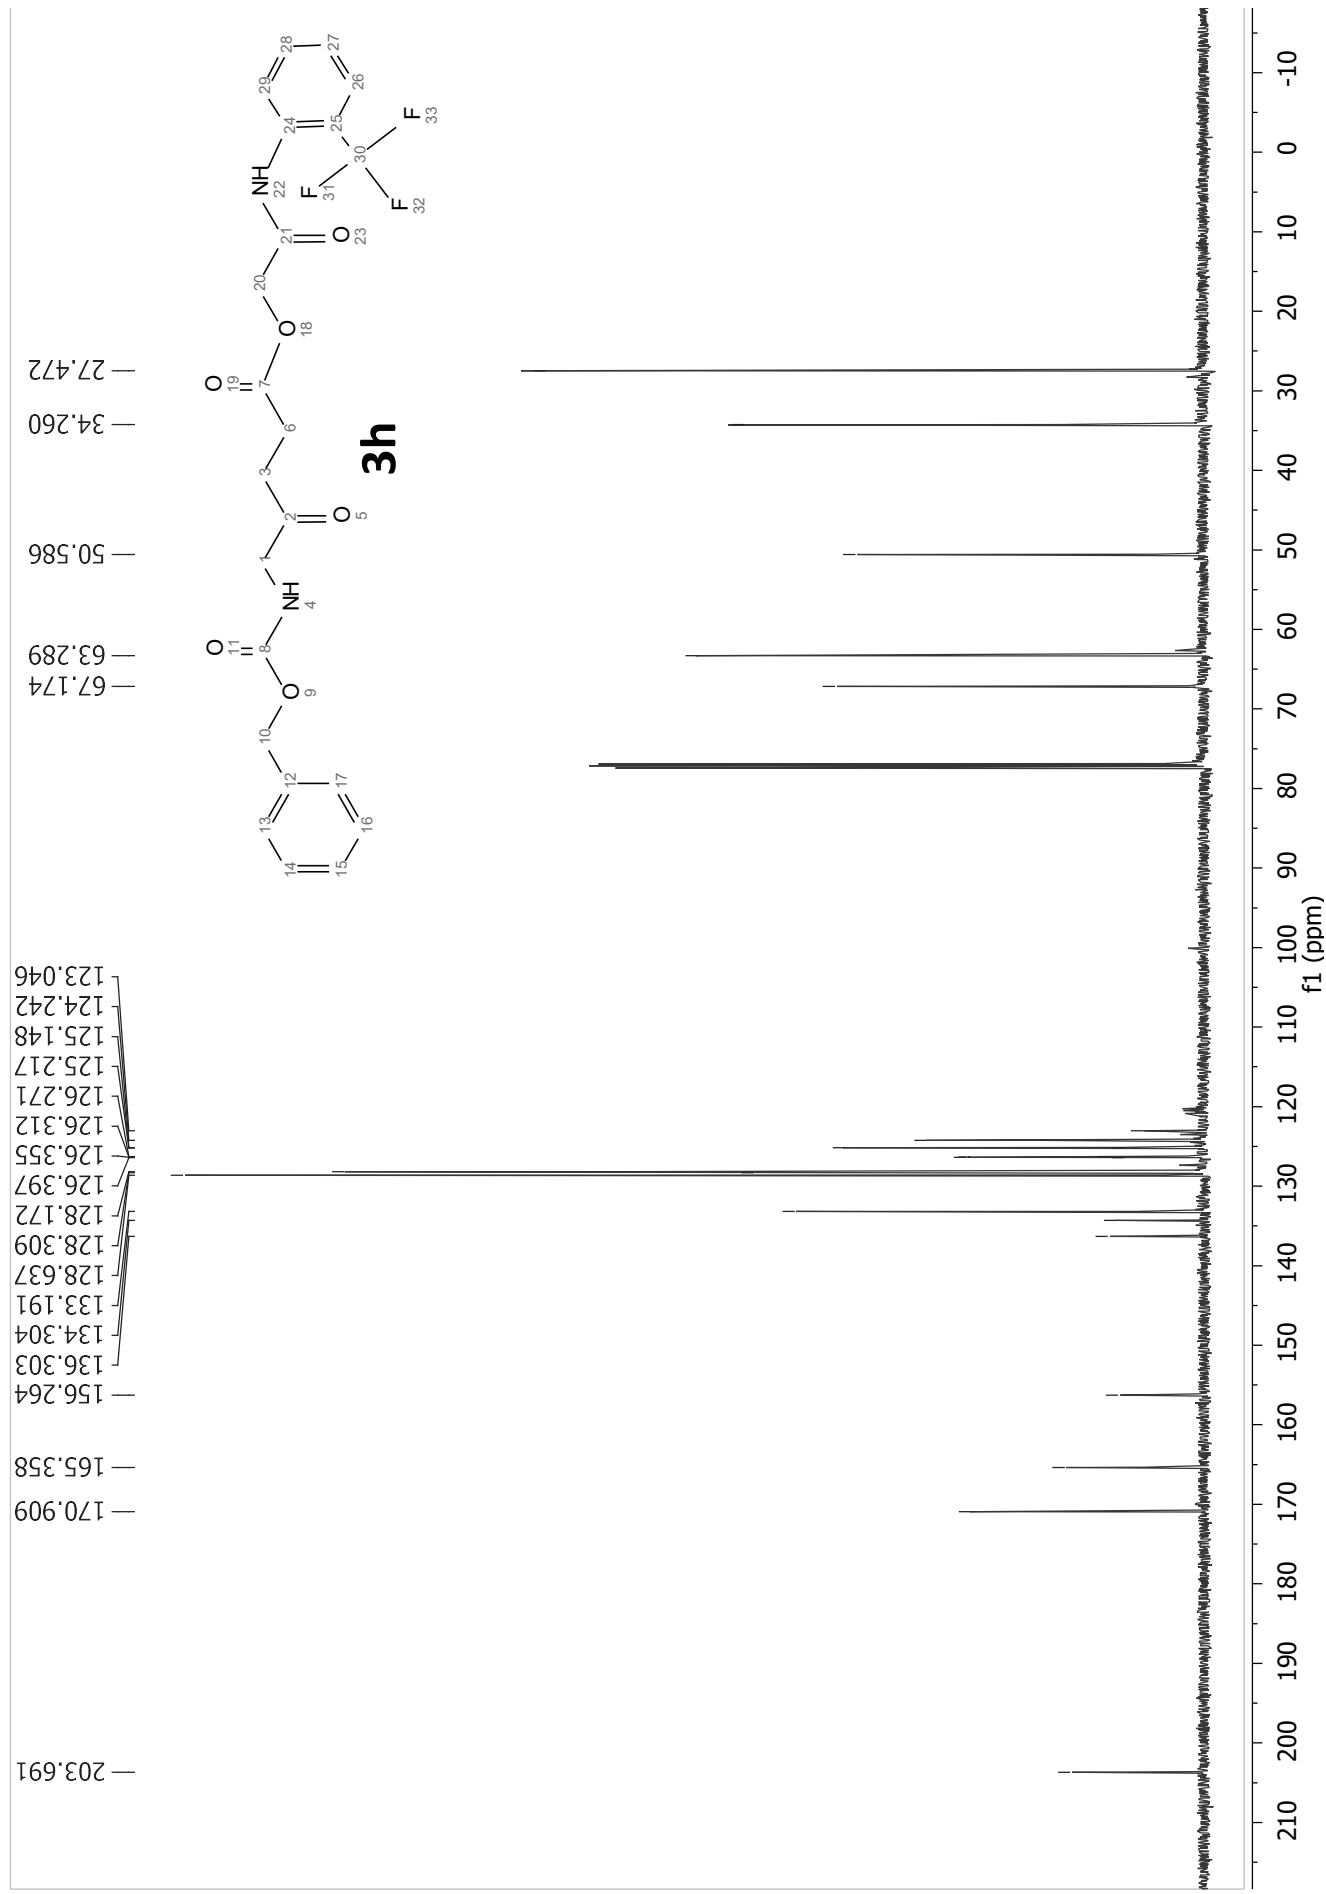

ESI MS/MS spectrum of m/z ([M+H]<sup>+</sup> cation of compound **3h** (collision Energy 10 eV)

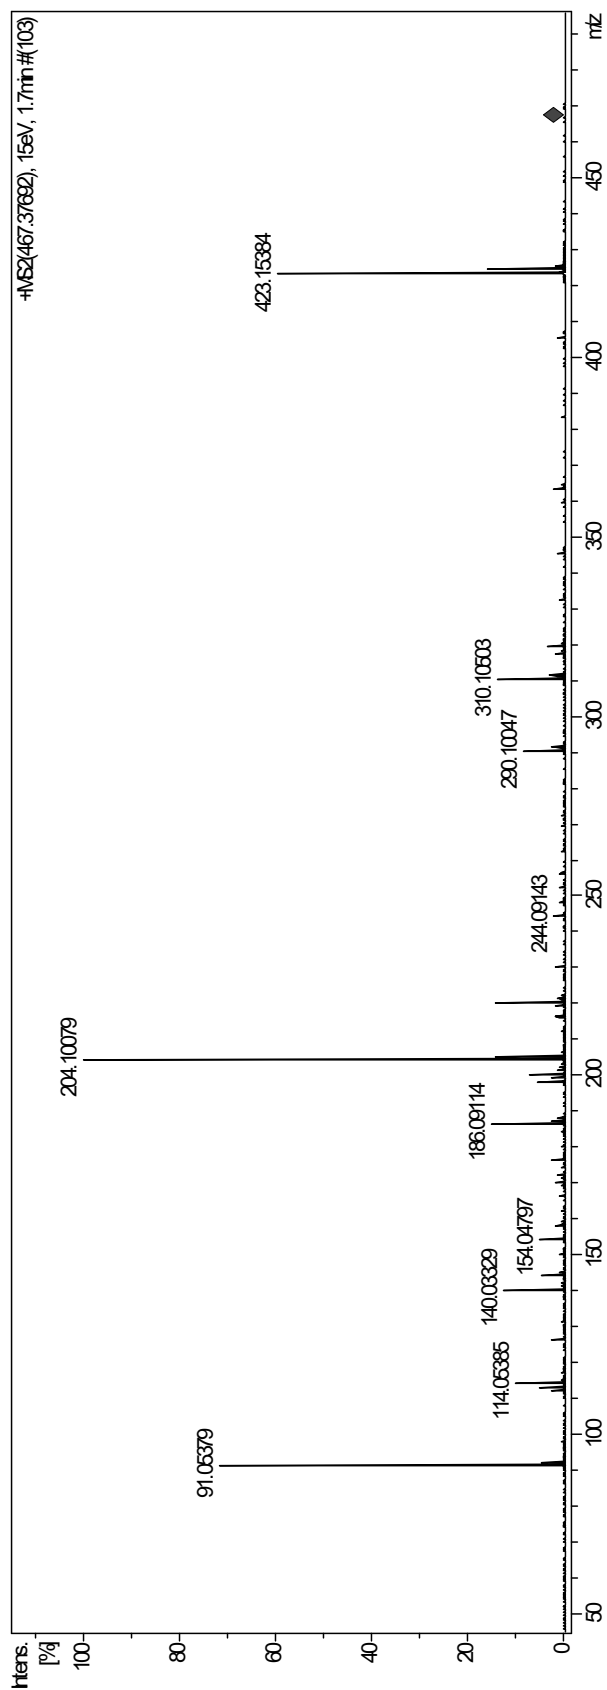

| Meas. m/z | Formula                                                         | m/z       | err [ppm] | rdb  | N-Rule <sup>-</sup> | Conf    |
|-----------|-----------------------------------------------------------------|-----------|-----------|------|---------------------|---------|
| 91.05379  | C <sub>7</sub> H <sub>7</sub>                                   | 91.05423  | 4.8       | 4.5  | ok                  | even    |
| 114.05385 | C <sub>5</sub> H <sub>8</sub> N <sub>2</sub> O                  | 114.05495 | 9.7       | 9.7  | 2.5                 | ok even |
| 154.04797 | C <sub>7</sub> H <sub>8</sub> N <sub>2</sub> O                  | 154.04987 | 12.3      | 12.3 | 4.5                 | ok even |
| 186.09114 | C <sub>12</sub> H <sub>12</sub> N <sub>2</sub> O                | 186.09134 | 1.1       | 1.1  | 7.5                 | ok even |
| 204.10079 | C <sub>12</sub> H <sub>14</sub> N <sub>2</sub> O                | 204.10191 | 204.10191 | 5.5  | 6.5                 | ok even |
| 220.05725 | C <sub>9</sub> H <sub>9</sub> F <sub>3</sub> N <sub>2</sub> O   | 220.05799 | 220.05799 | 3.4  | 4.5                 | ok even |
| 290.10047 | C <sub>16</sub> H <sub>14</sub> F <sub>2</sub> N <sub>2</sub> O | 290.09871 | 290.09871 | -6.1 | 9.5                 | ok even |
| 310.10503 | C <sub>16</sub> H <sub>15</sub> F <sub>3</sub> N <sub>2</sub> O | 310.10494 | 310.10494 | -0.3 | 8.5                 | ok even |
| 423.15384 | C <sub>21</sub> H <sub>22</sub> F <sub>3</sub> N <sub>2</sub> O | 423.15262 | 423.15262 | -2.9 | 10.5                | ok even |



<sup>1</sup>H-NRM (500 MHz) of compound 2-((4-bromo-2-methylphenyl)amino)-2-oxoethyl-2-oxoethyl-N-(benzyloxycarbonyl)-5-aminolevulinatate (**3i**)

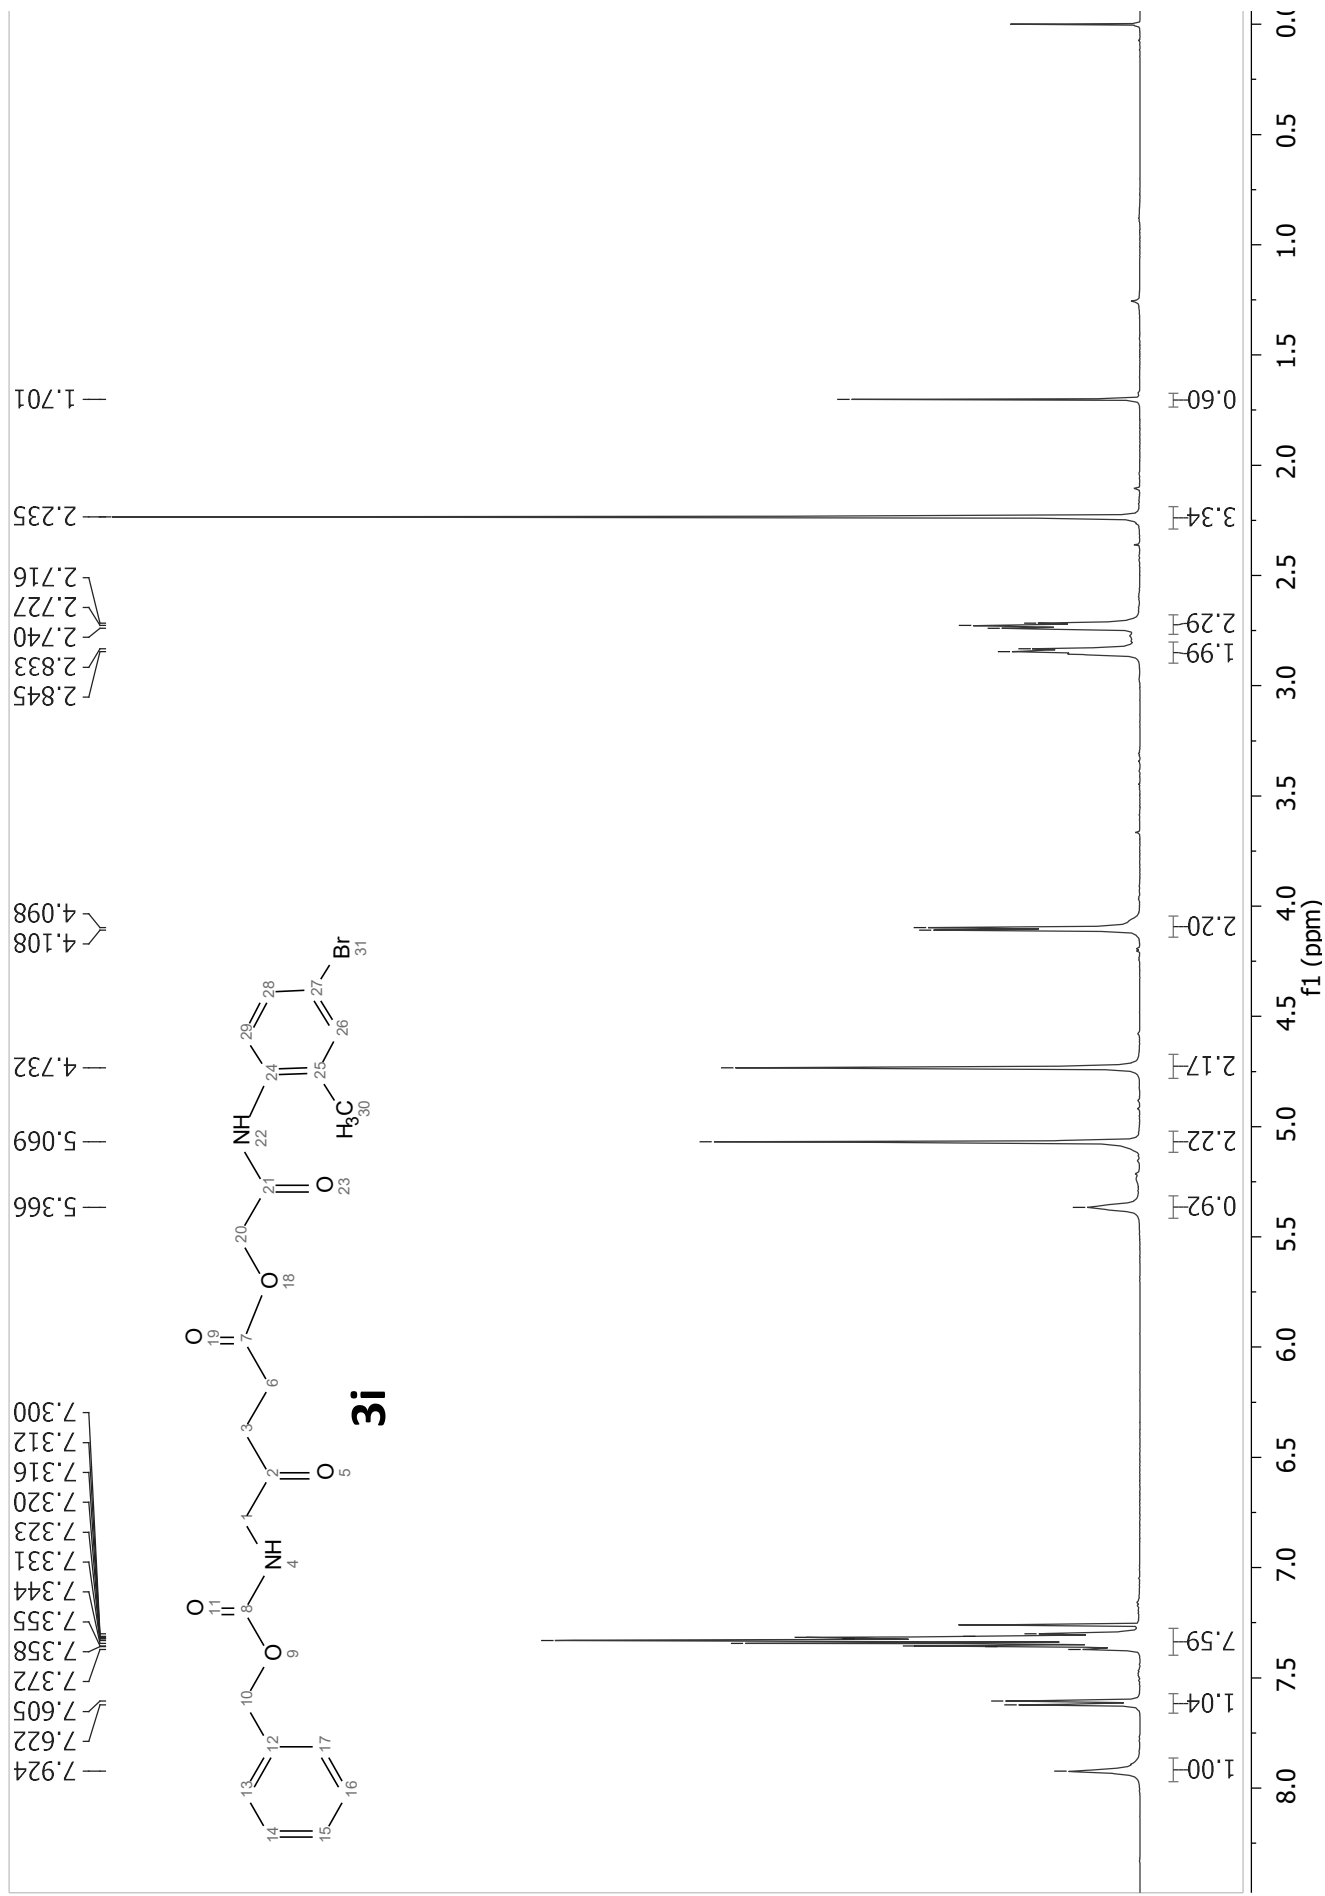

<sup>13</sup>C-NRM (125,7 MHz) of compound **3i**

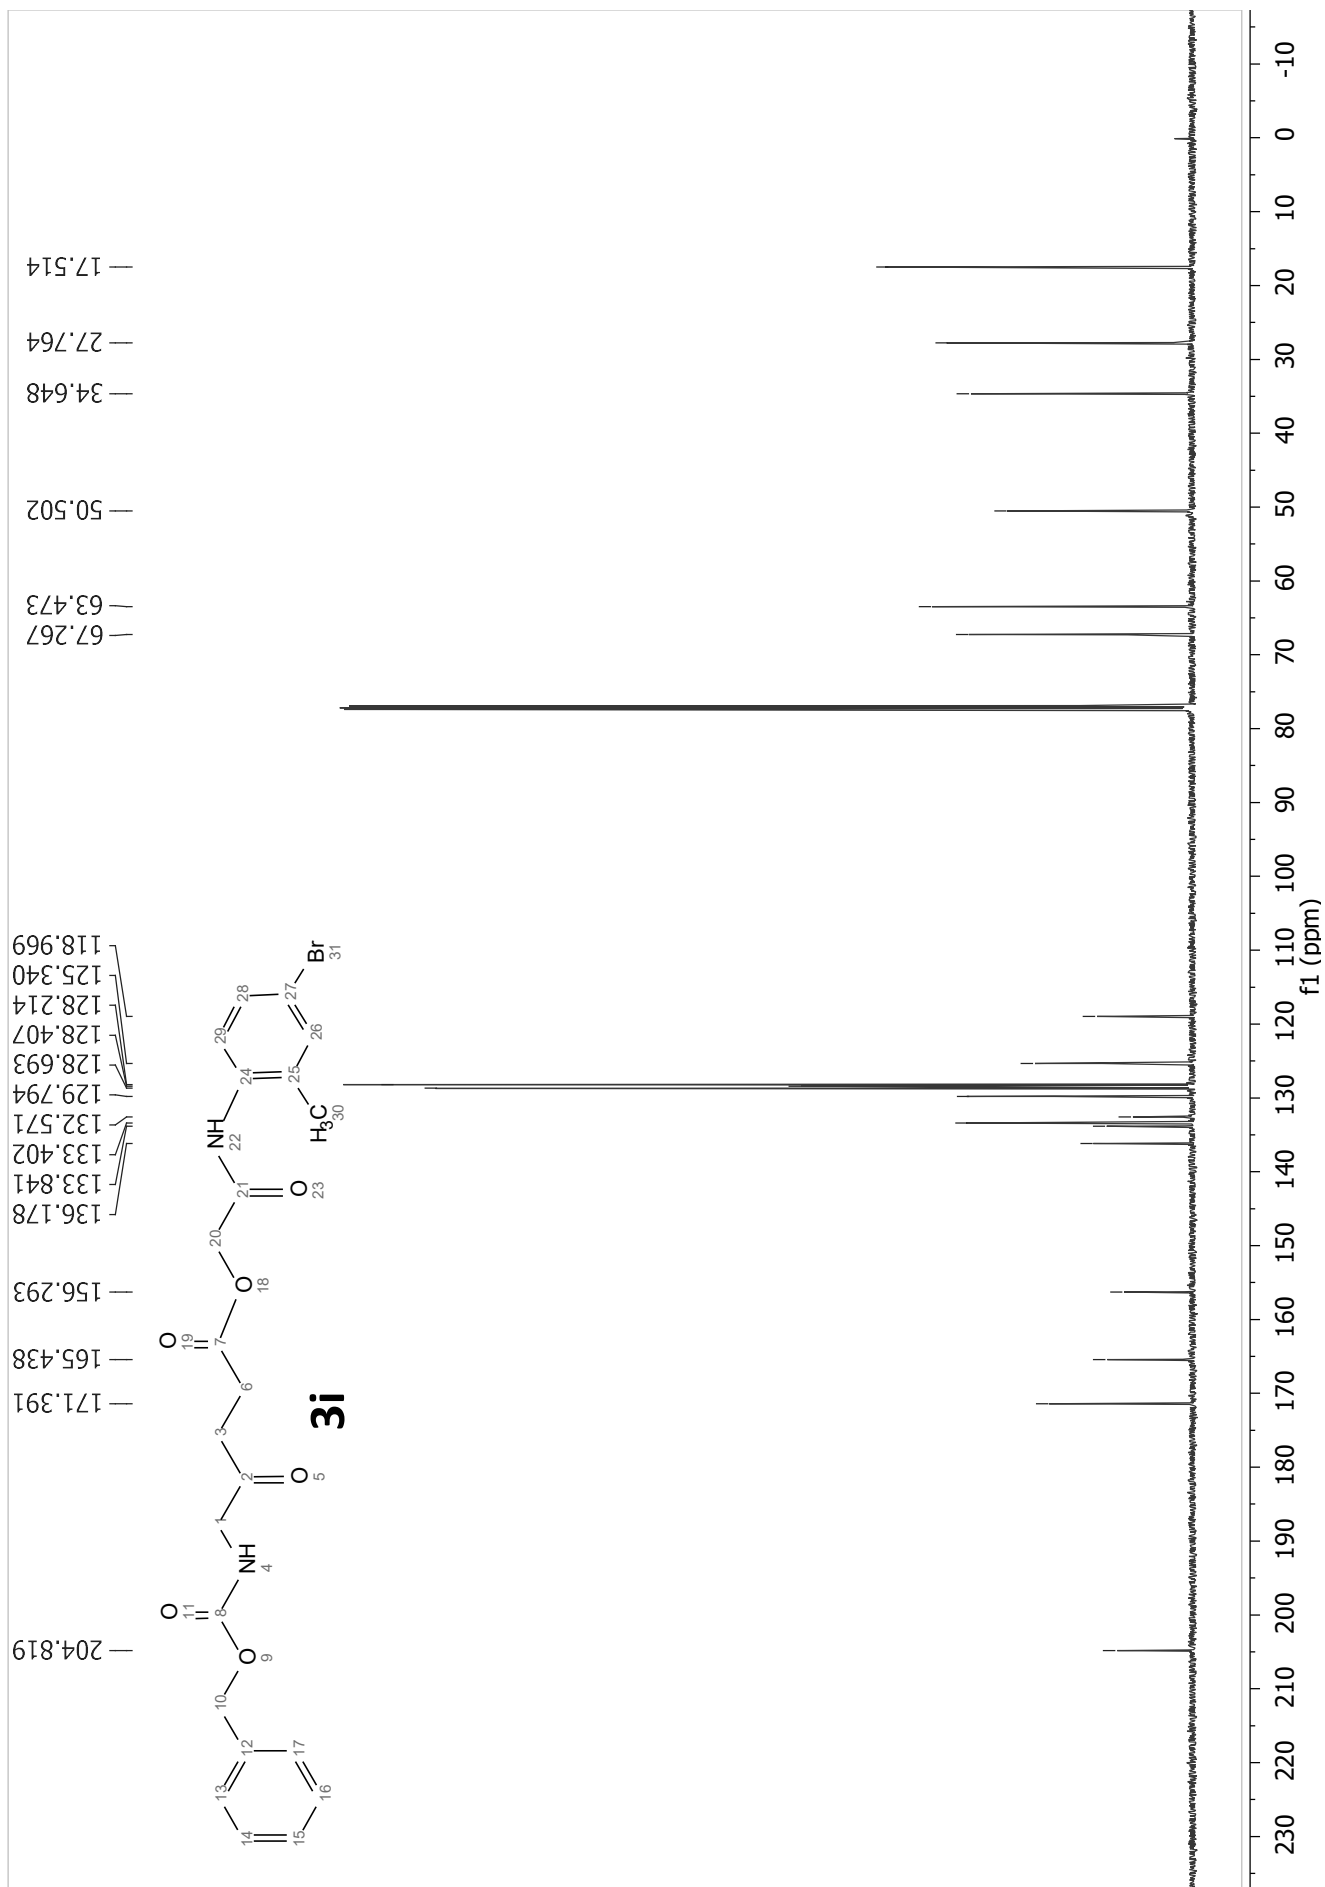

COSY (500 MHz) of compound **3i**

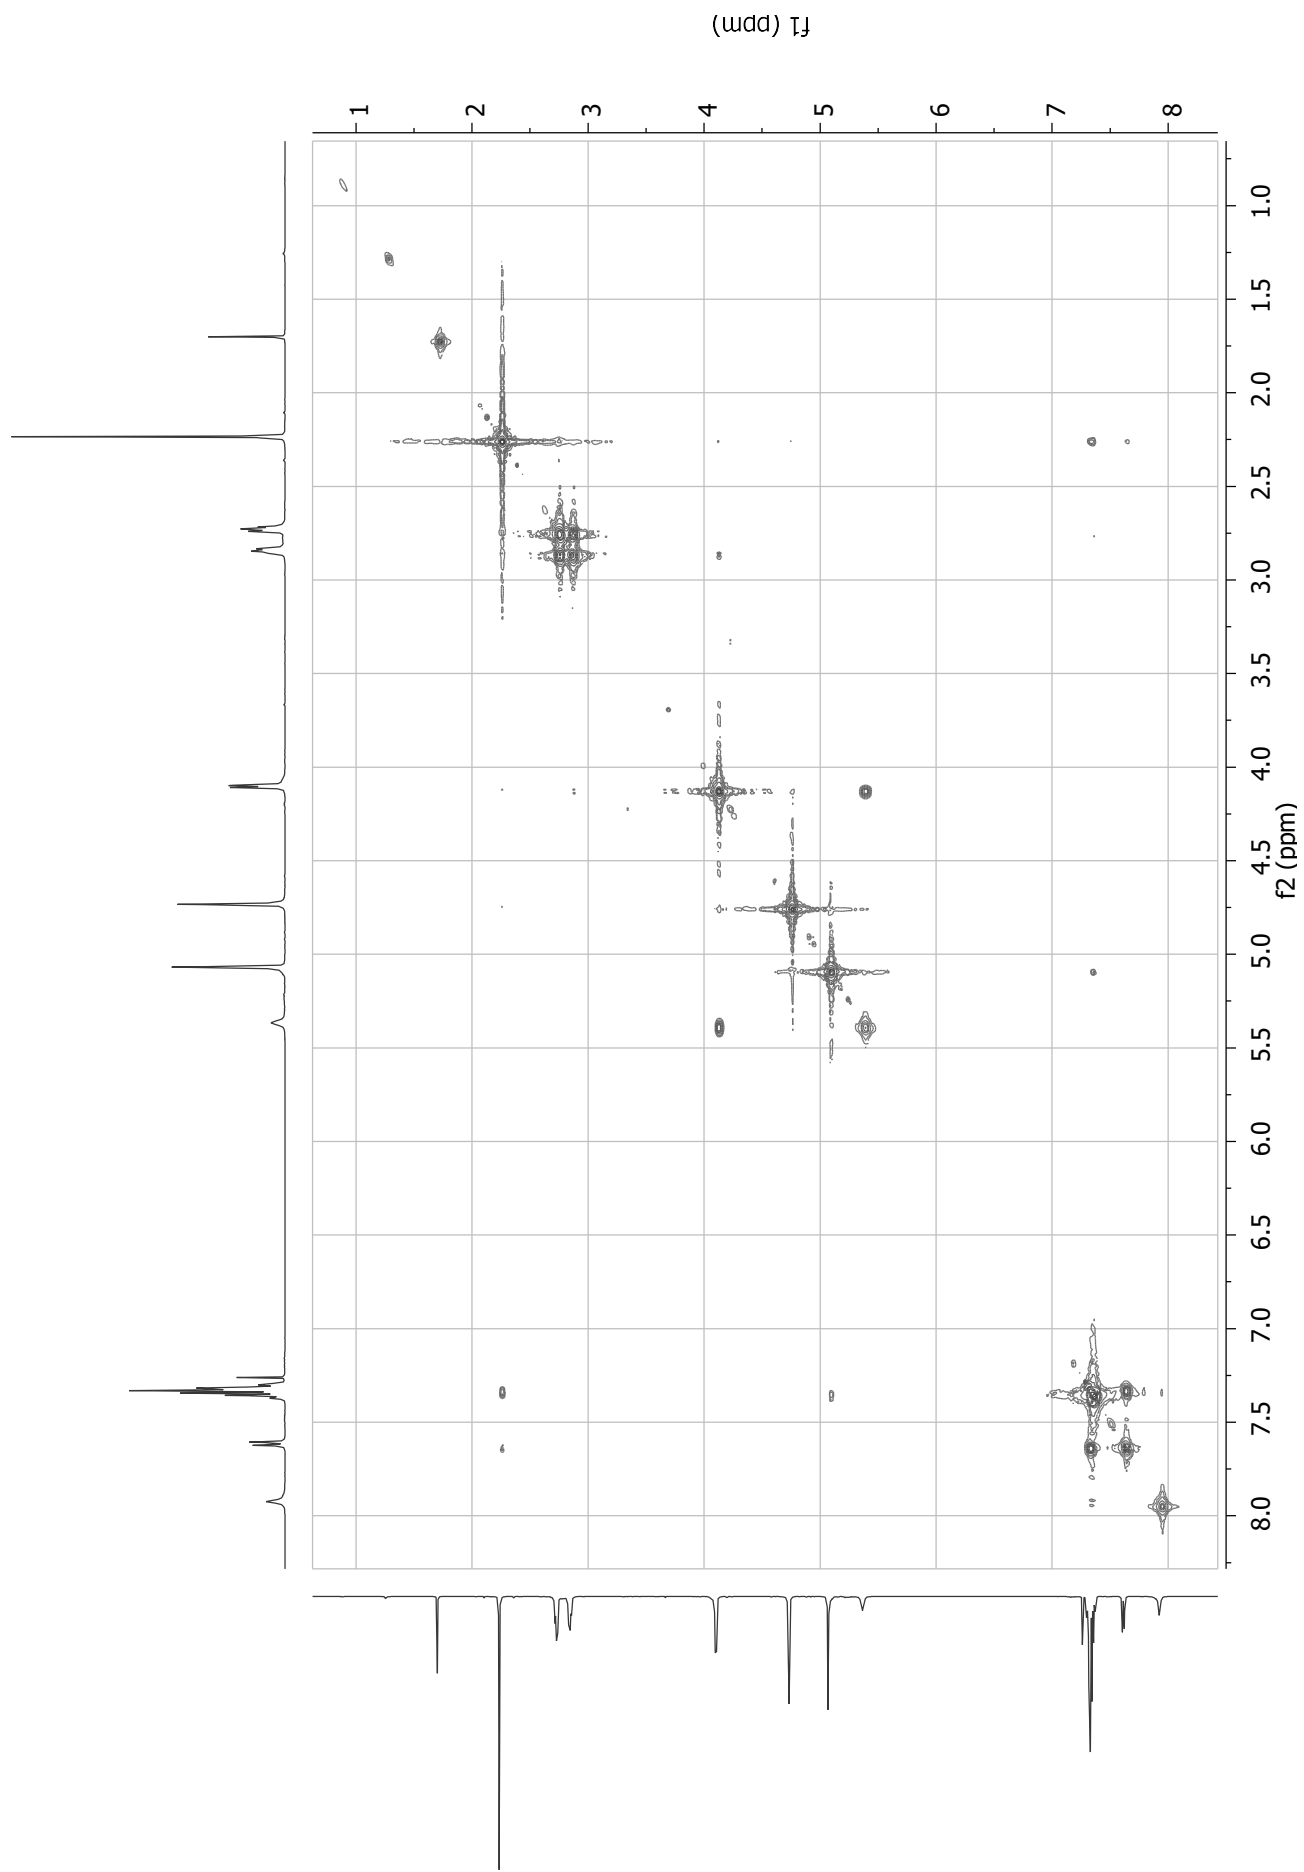

HSQC-DEPT (500 MHz) of compound **3i**

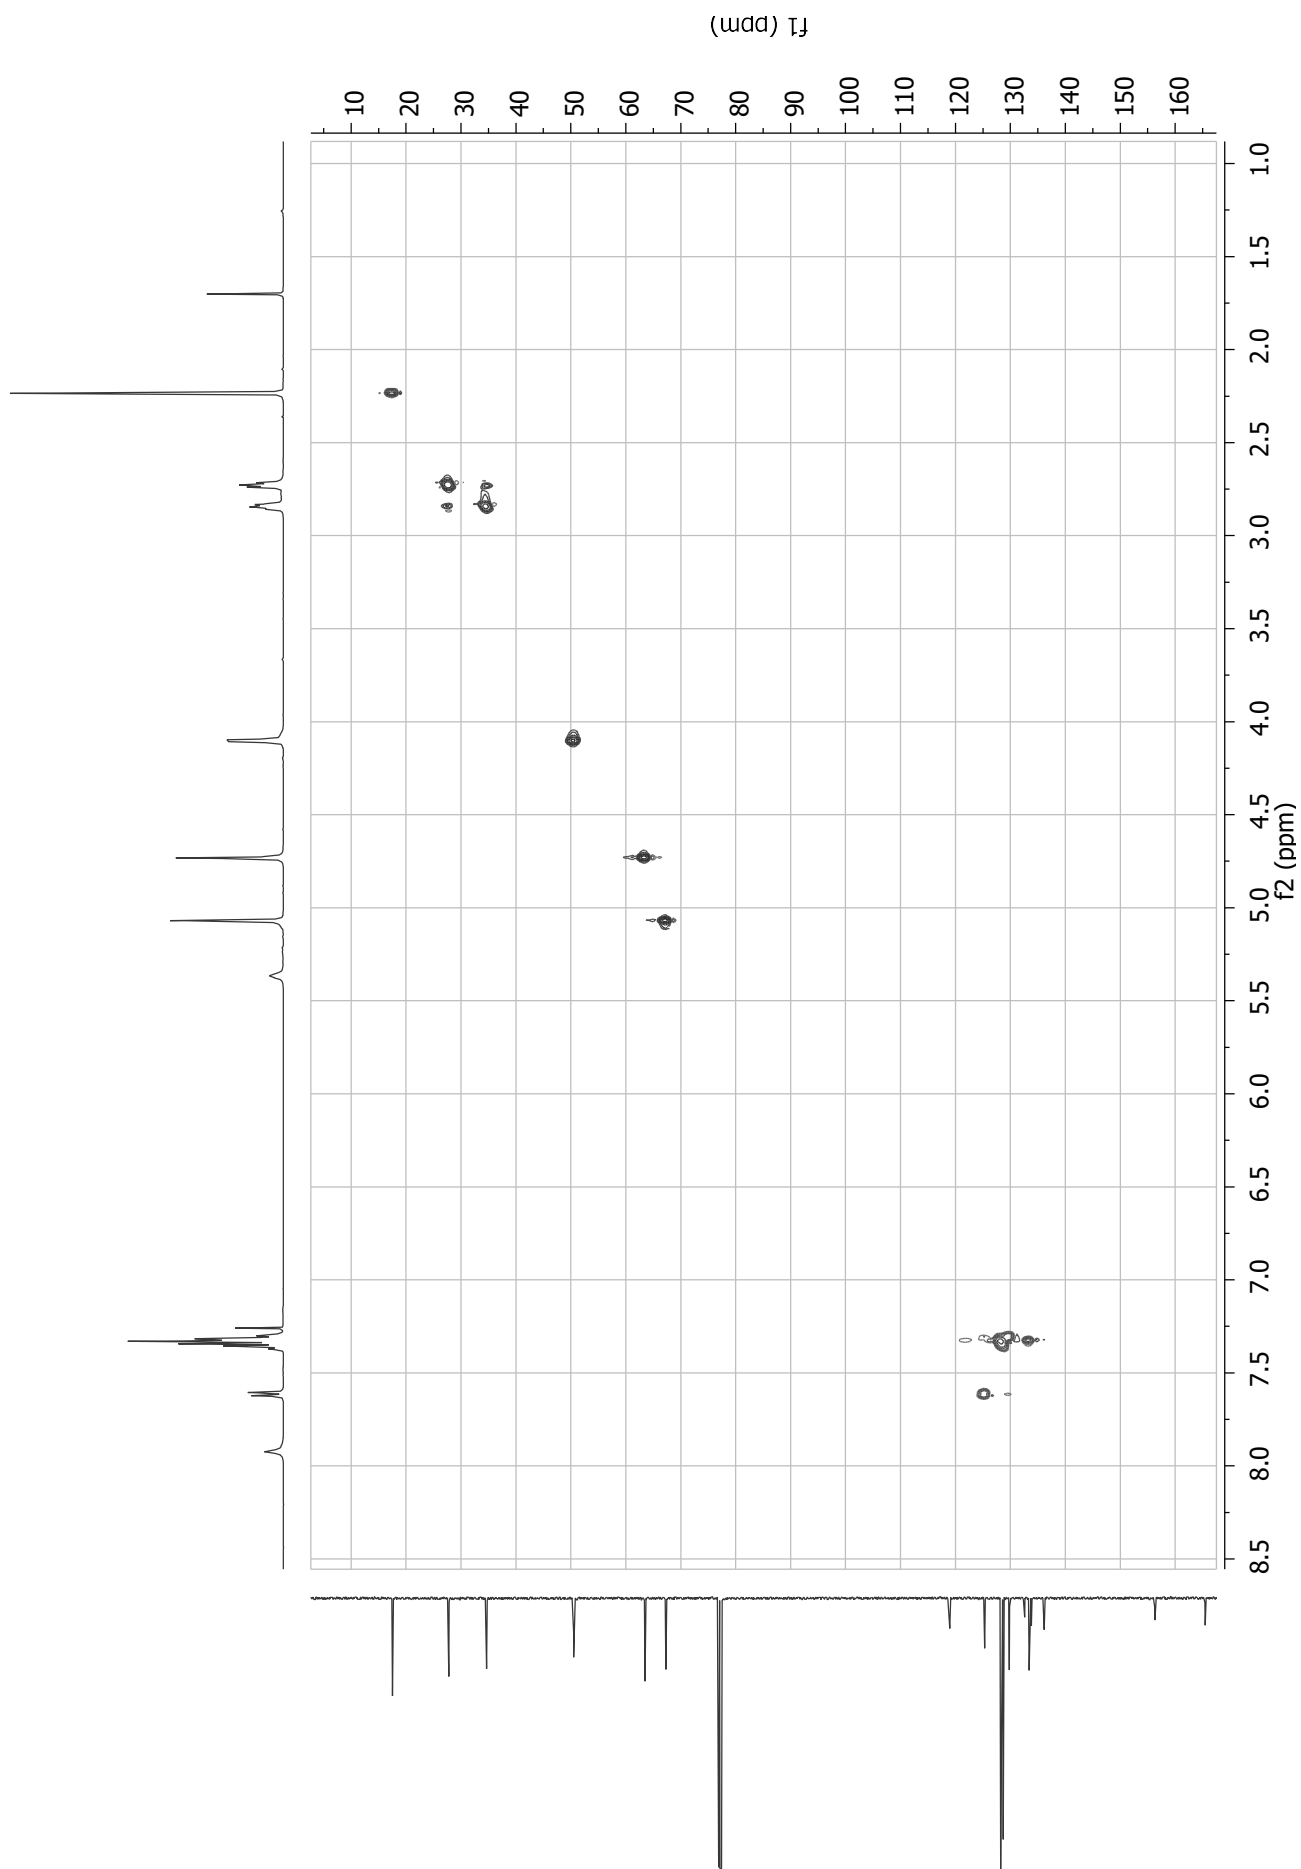

HMBC (500 MHz) of compound **3i**

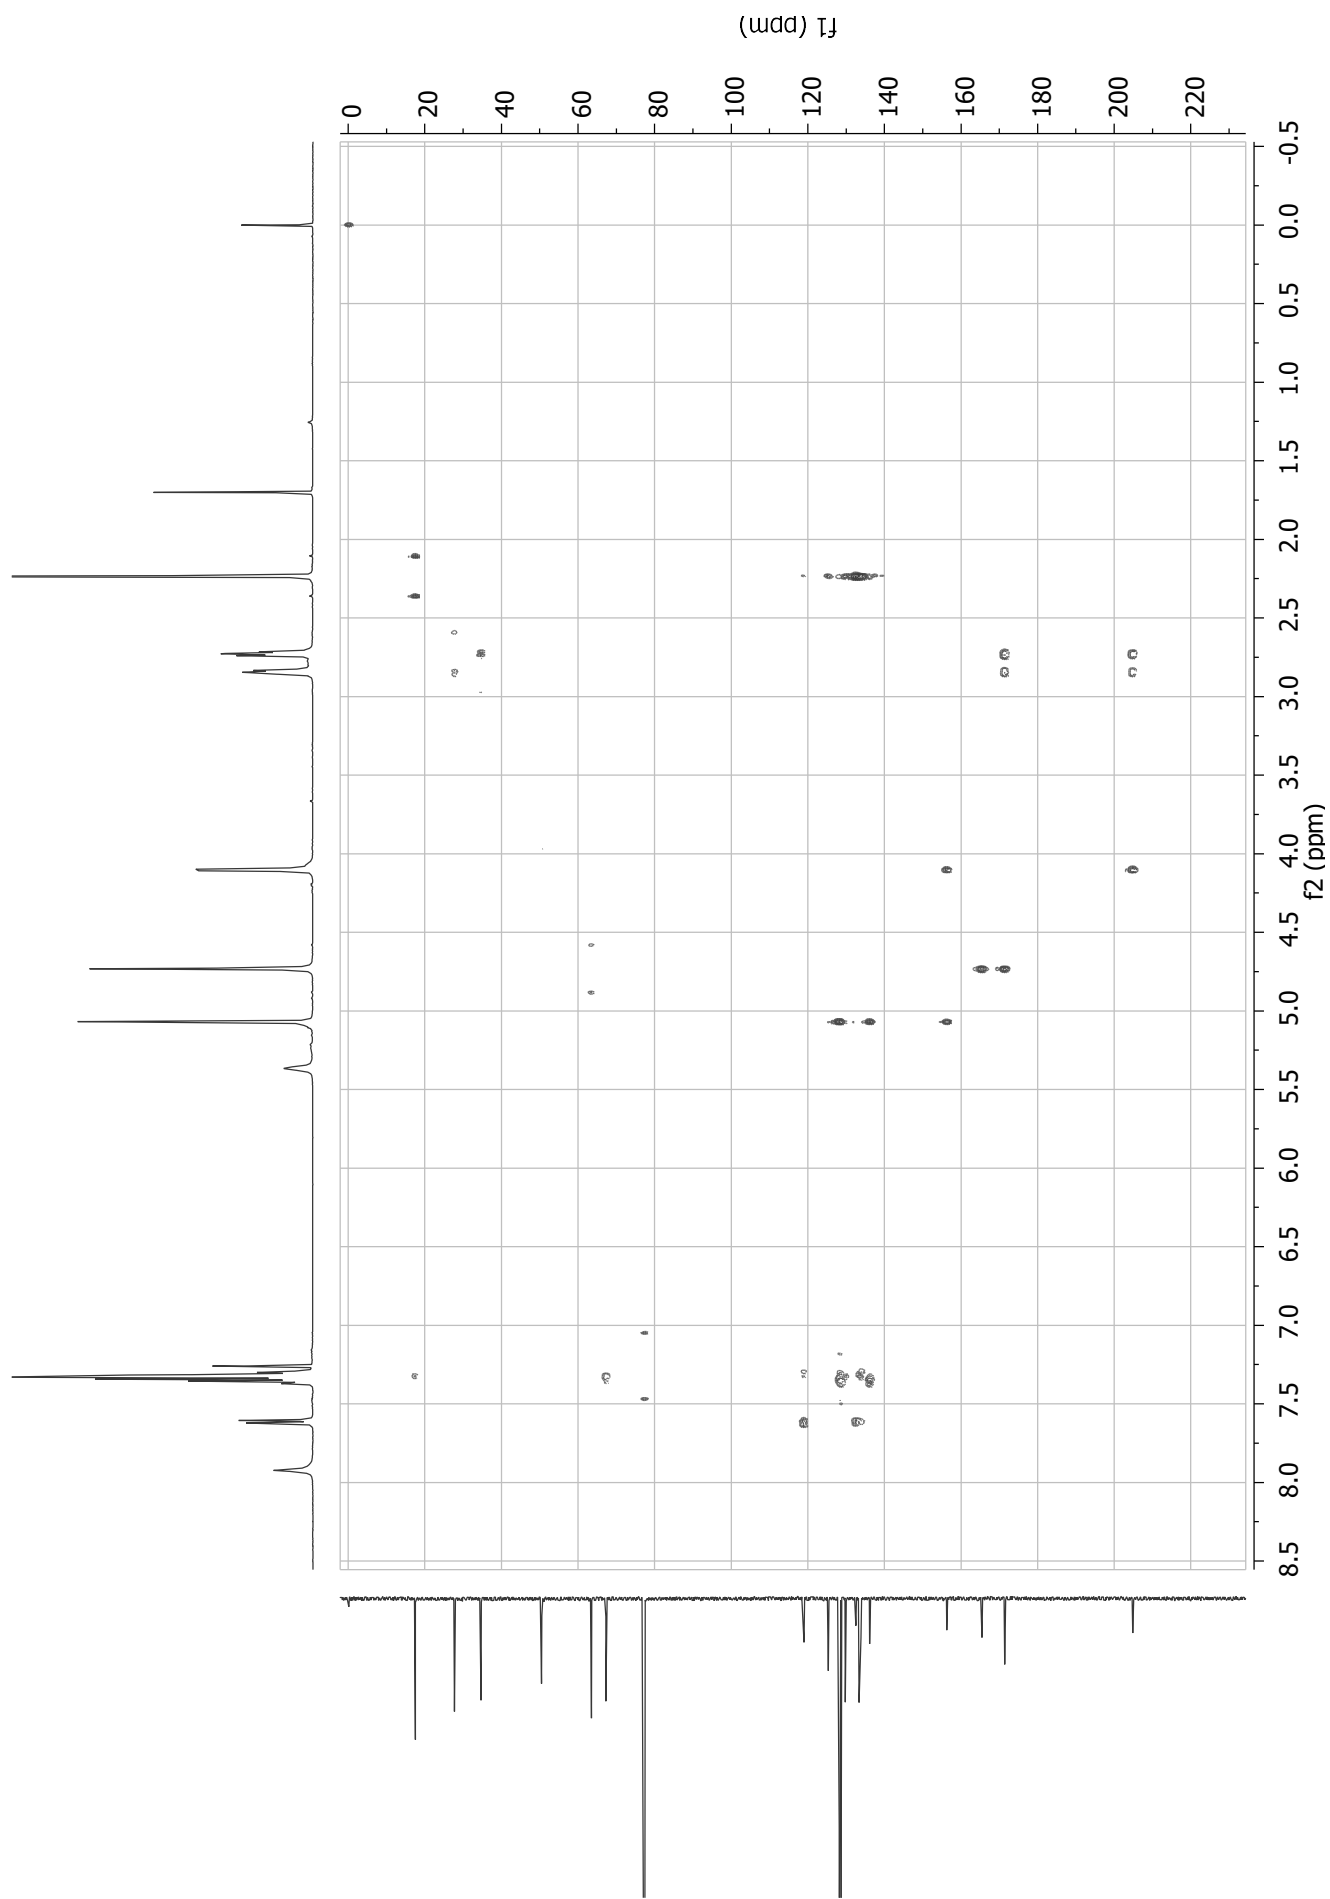

# ESI MS/MS spectrum of m/z ([M+H]<sup>+</sup> cation of compound **3i** (collision Energy 10 eV)

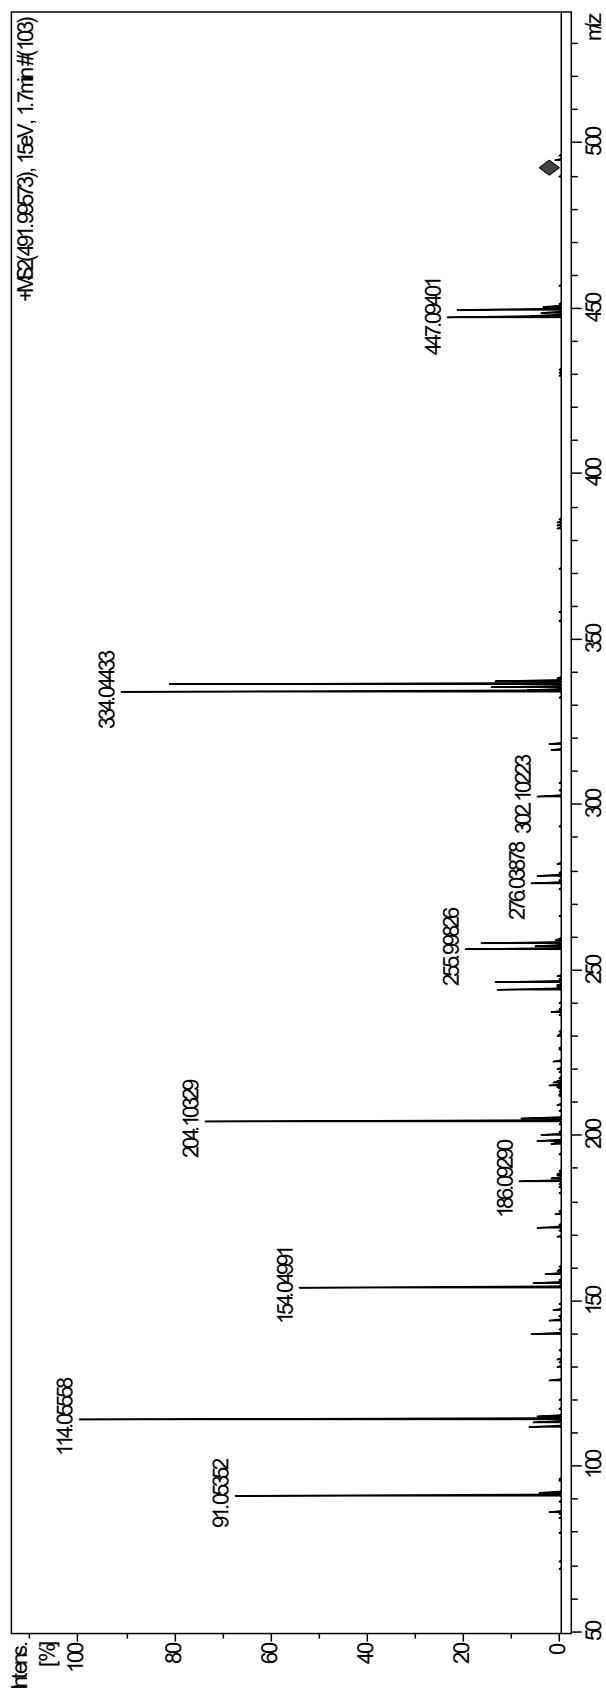

| Obs. m/z | Formula                                                         | m/z       | err [ppm] | rdB  | N-Rule | Conf                  |
|----------|-----------------------------------------------------------------|-----------|-----------|------|--------|-----------------------|
| 05352    | C <sub>7</sub> H <sub>7</sub>                                   | 91.05423  | 7.7       | ok   | even   |                       |
| 4.05558  | C <sub>5</sub> H <sub>8</sub> N <sub>2</sub> O                  | 114.05495 | -5.5      | 2.5  | ok     | even                  |
| 4.04991  | C <sub>7</sub> H <sub>8</sub> N <sub>2</sub> O <sub>3</sub>     | 154.04987 | -0.3      | 4.5  | ok     | even                  |
| 5.09290  | C <sub>12</sub> H <sub>12</sub> N <sub>2</sub> O                | 186.09134 | -8.4      | 7.5  | ok     | even                  |
| 4.10329  | C <sub>12</sub> H <sub>14</sub> N <sub>2</sub> O <sub>2</sub>   | 204.10191 | -6.8      | 6.5  | ok     | even                  |
| 5.99826  | C <sub>10</sub> H <sub>11</sub> BrN <sub>2</sub> O <sub>2</sub> | 255.99677 | -5.8      | 5.5  | ok     | even                  |
| 5.03878  | C <sub>14</sub> H <sub>15</sub> BrN                             | 276.03824 | -2.0      | 7.5  | ok     | even                  |
| 4.04433  | C <sub>16</sub> H <sub>17</sub> BrN <sub>2</sub> O <sub>2</sub> | 334.04372 | -1.8      | 8.5  | ok     | even                  |
| 7.09401  | C <sub>21</sub> H <sub>24</sub> BrN <sub>2</sub> O <sub>4</sub> | 447.09140 | 447.09140 | -5.8 | 10.5   | ok                    |
|          |                                                                 |           |           |      |        | 204-H <sub>2</sub> O  |
|          |                                                                 |           |           |      |        | id ant                |
|          |                                                                 |           |           |      |        | 447-113               |
|          |                                                                 |           |           |      |        | even -CO <sub>2</sub> |

<sup>1</sup>H-NRM (500 MHz) of compound 2-oxo-2-(pentadecylamino)ethyl-N-(benzyloxycarbonyl)-5-aminolevulinat (3j)

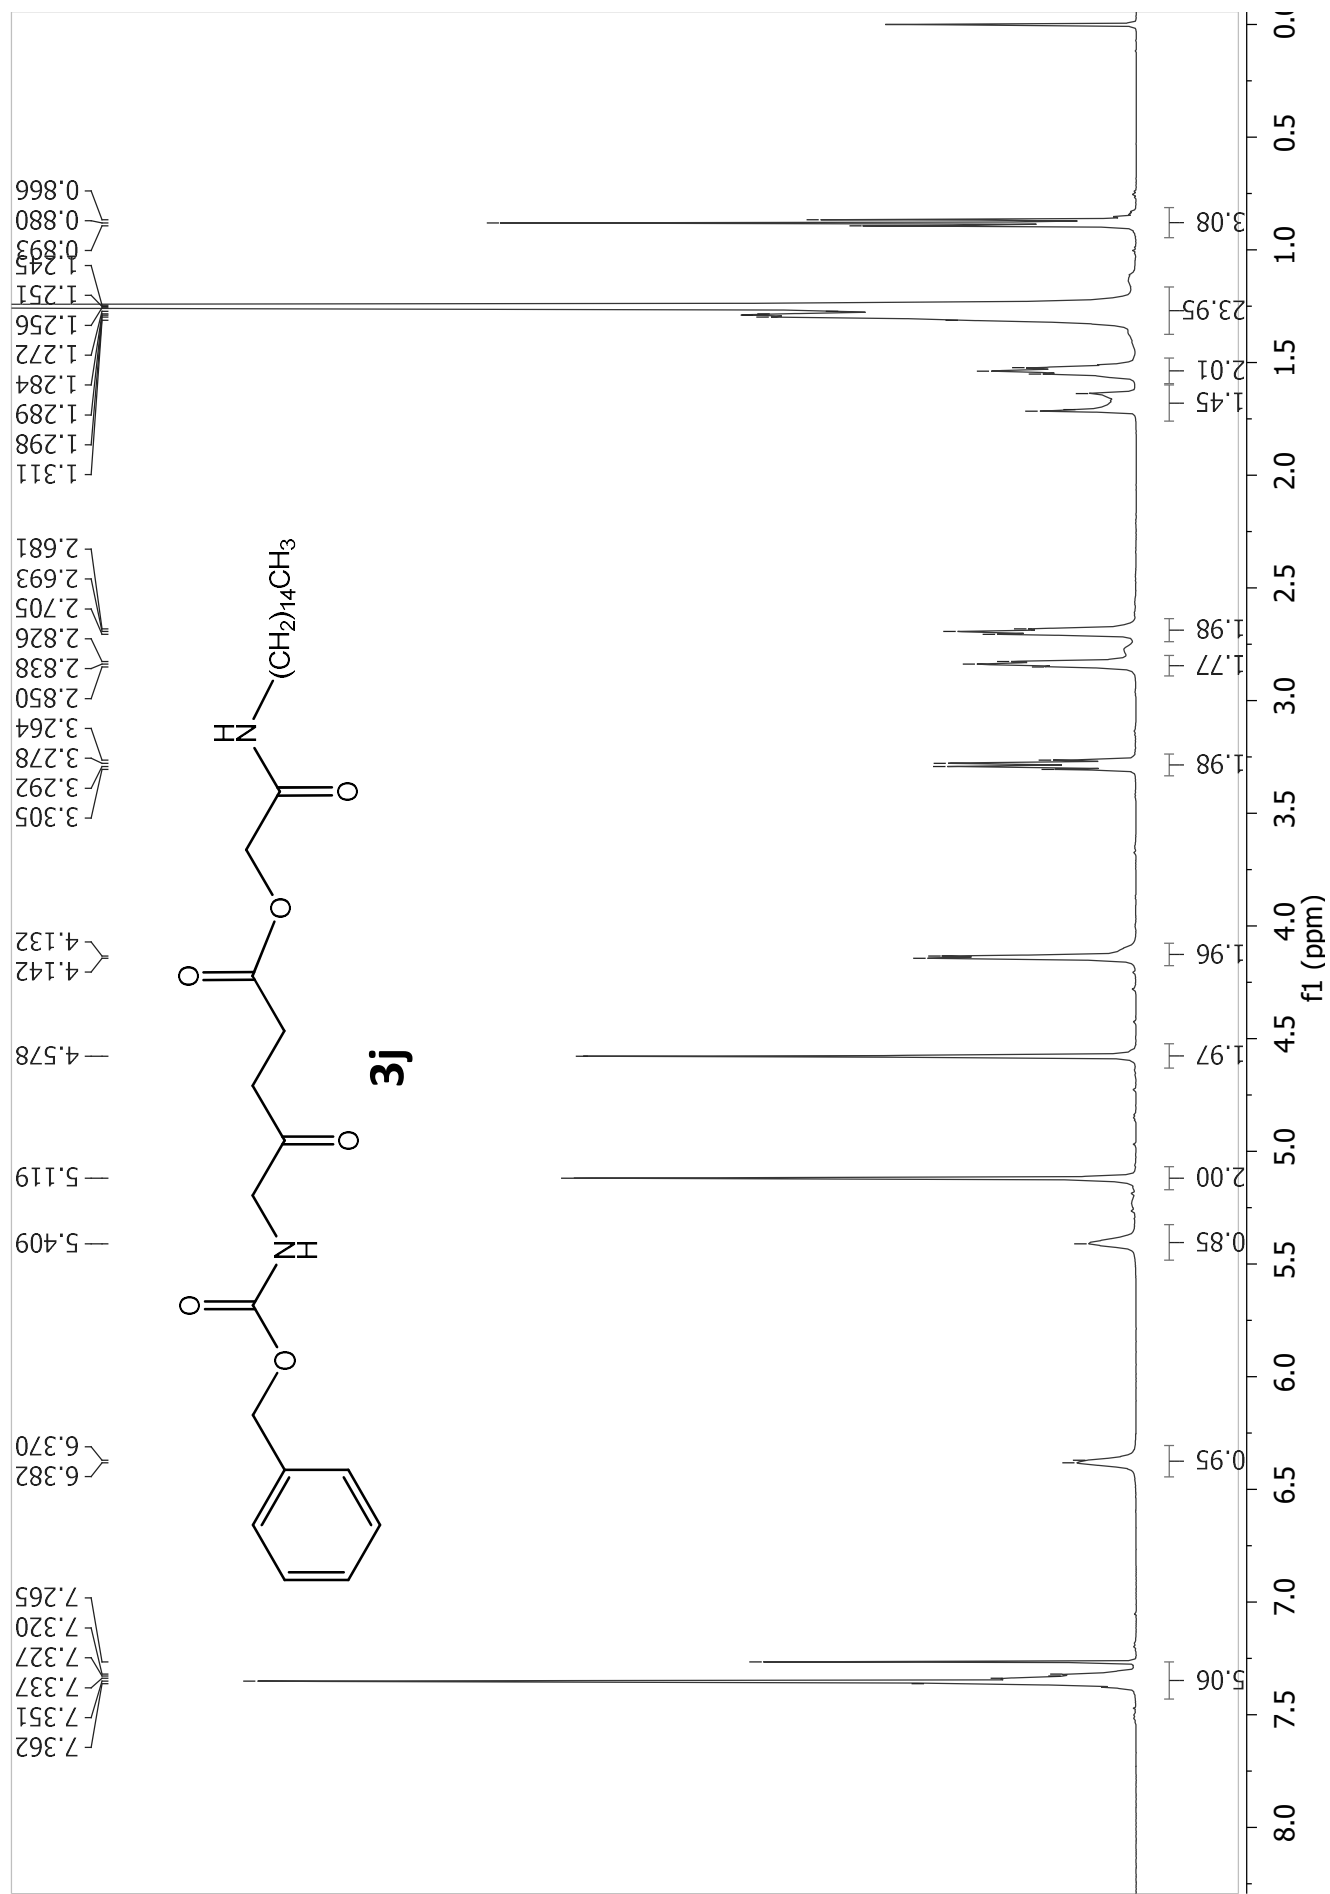

<sup>13</sup>C-NRM (50,3 MHz) of compound **3j**

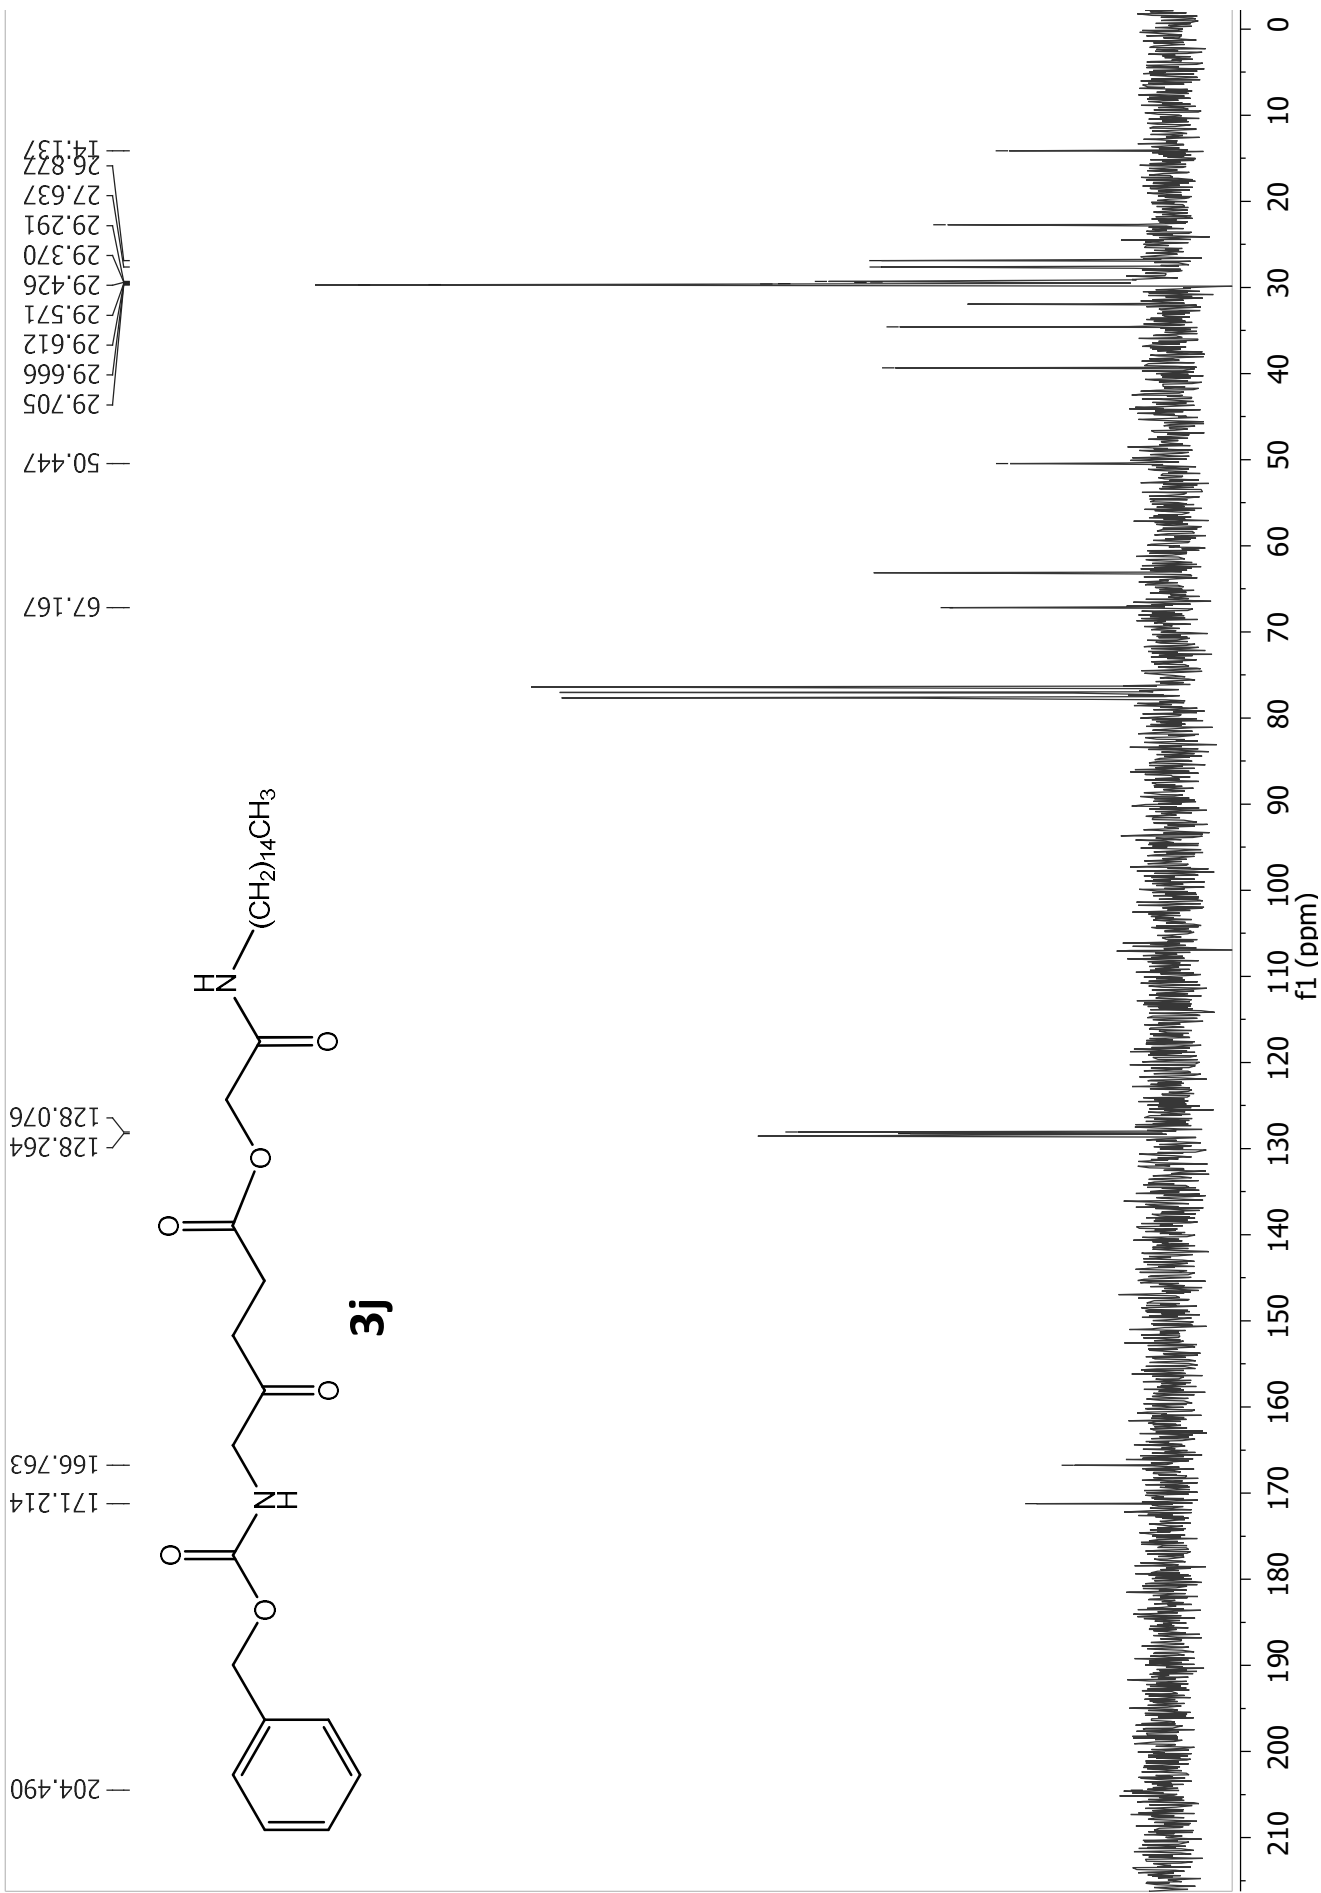



ESI MS/MS spectrum of m/z ([M+H]<sup>+</sup> cation of compound **3j** (collision Energy 10 eV)

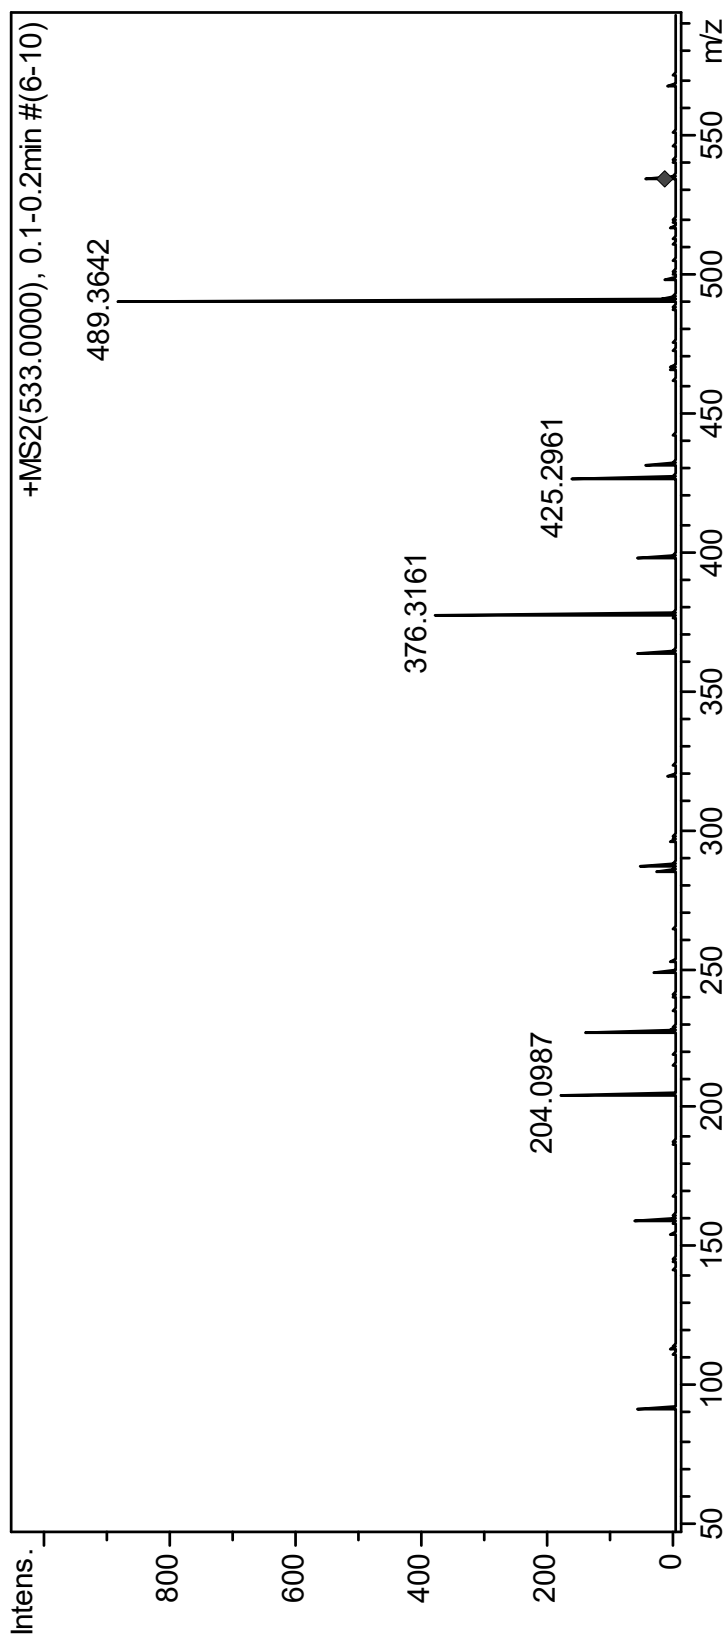

| Meas. m/z | Formula                                                       | m/z      | err [ppm] | rdp  | N-Rule | e <sup>-</sup> Conf |
|-----------|---------------------------------------------------------------|----------|-----------|------|--------|---------------------|
| 204.0987  | C <sub>12</sub> H <sub>14</sub> N <sub>2</sub> O <sub>2</sub> | 204.1019 | 204.1019  | -4.1 | 6.5    | ok                  |
| 425.2961  | C <sub>23</sub> H <sub>41</sub> N <sub>2</sub> O <sub>5</sub> | 425.3010 | 425.3010  | 11.6 | 4.5    | ok                  |
| 489.3642  | C <sub>29</sub> H <sub>49</sub> N <sub>2</sub> O <sub>4</sub> | 489.3687 | 489.3687  | 9.1  | 6.5    | ok                  |

<sup>1</sup>H-NRM (500 MHz) of compound 2-(2-ethoxy-2-oxoethylamino)-2-oxoethyl-5-aminolevulinat (1a)

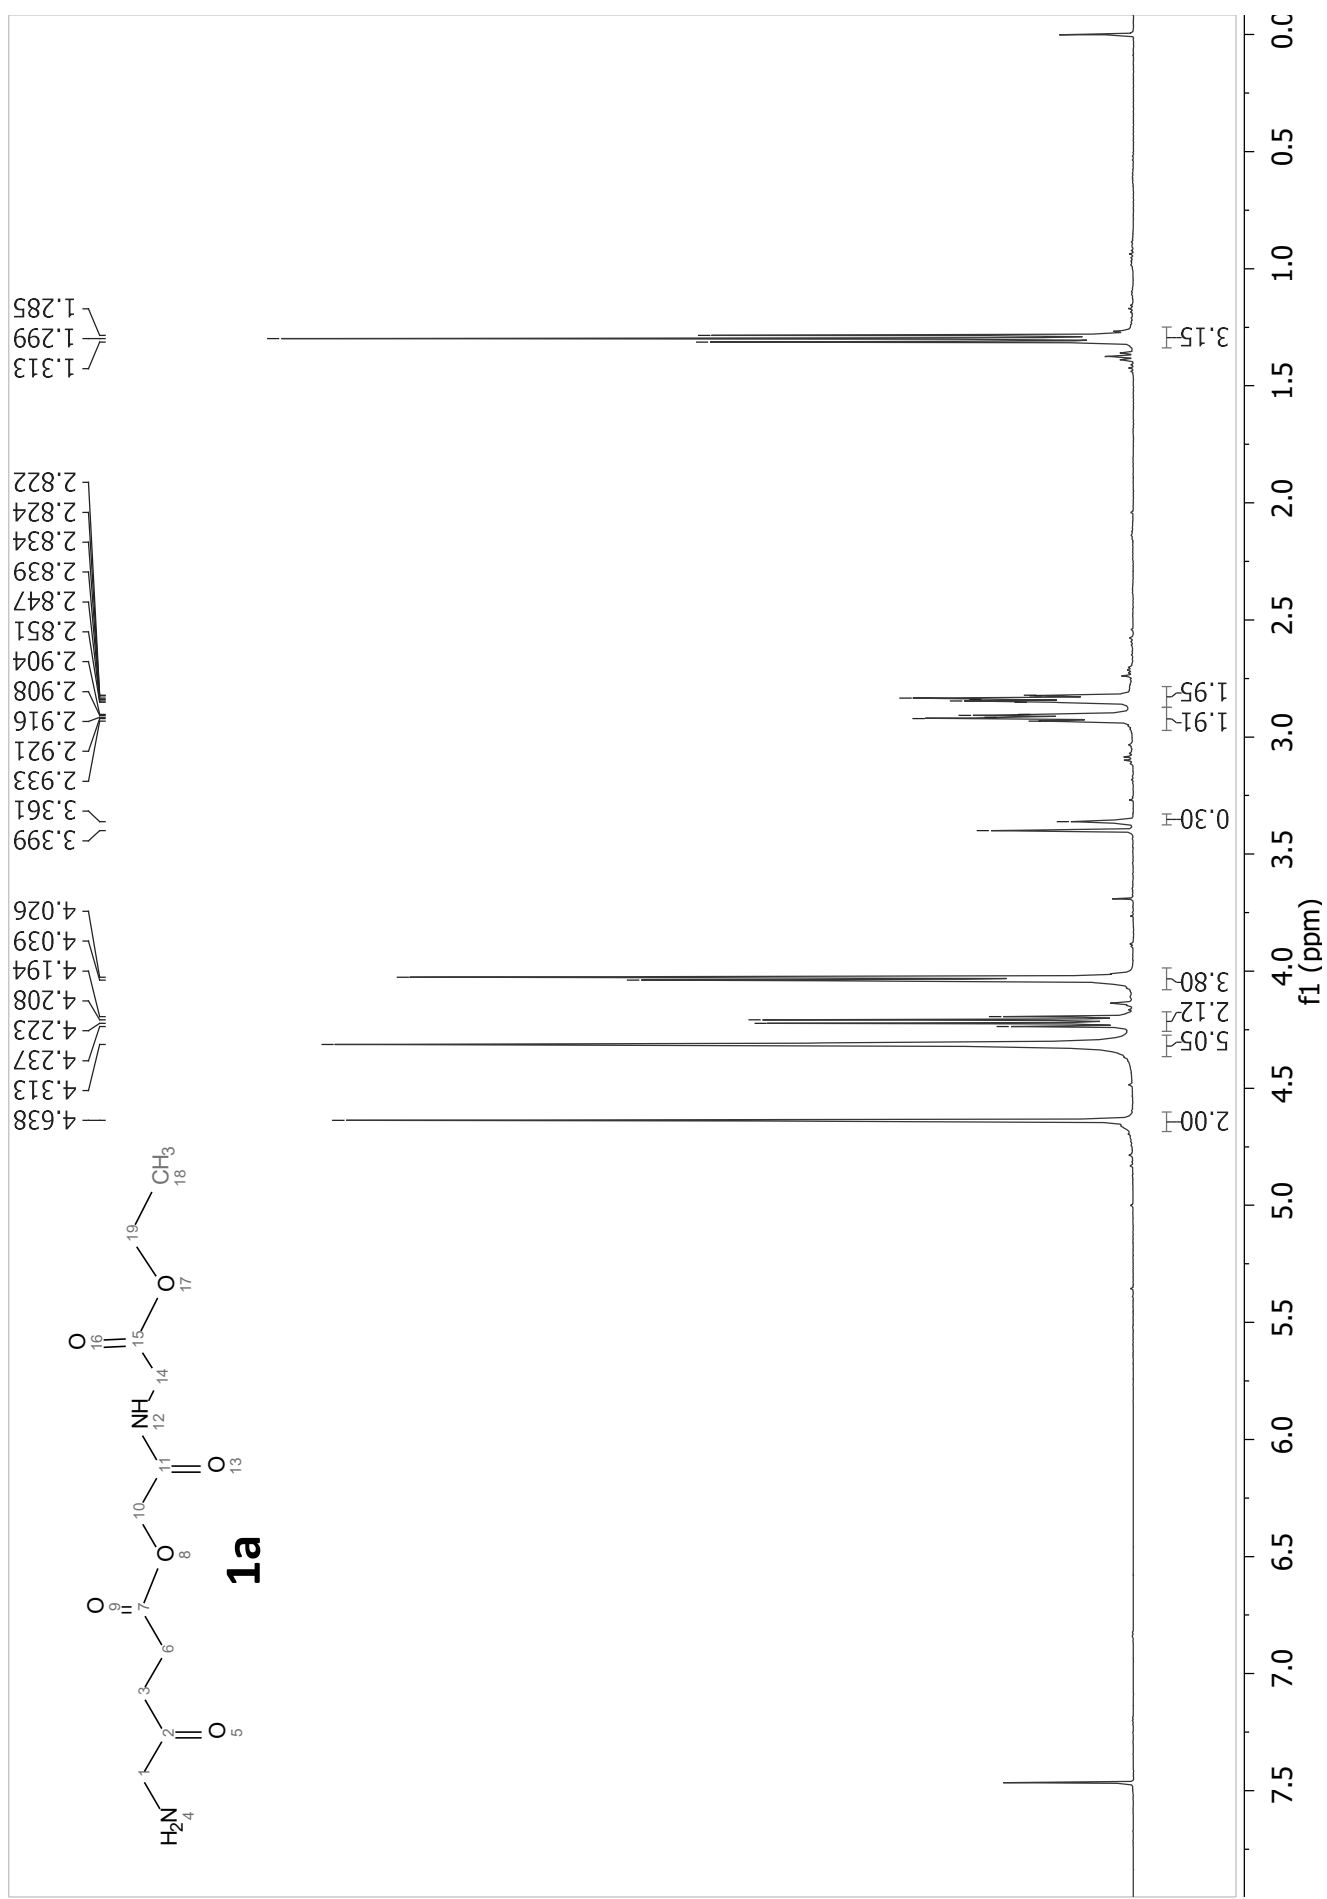

<sup>13</sup>C-NRM (125,7 MHz) for compound **1a**

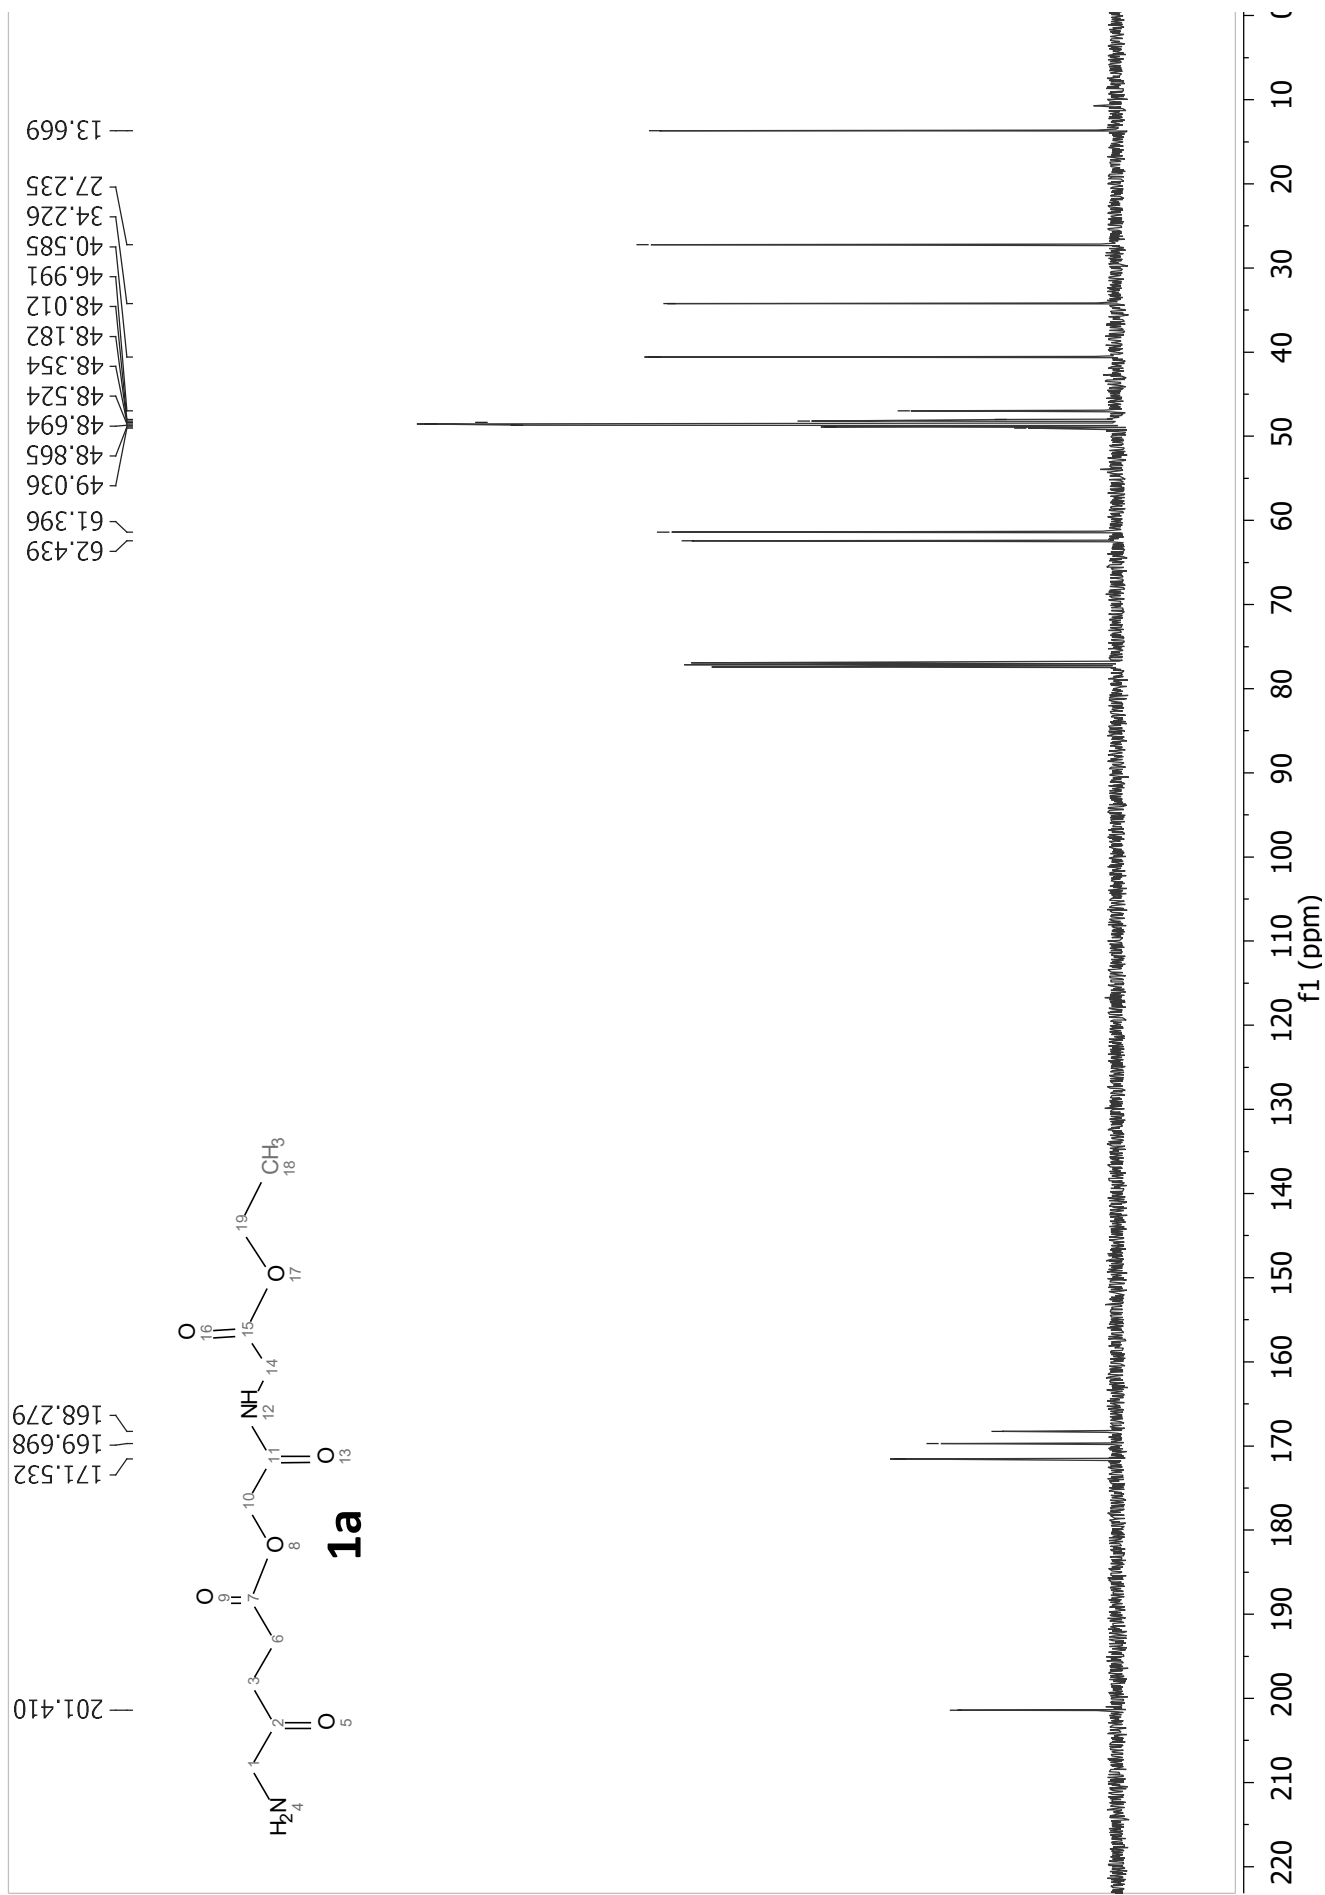

ESI MS/MS spectrum of m/z ([M+H]<sup>+</sup> cation of compound **1a** (collision Energy 10 eV)

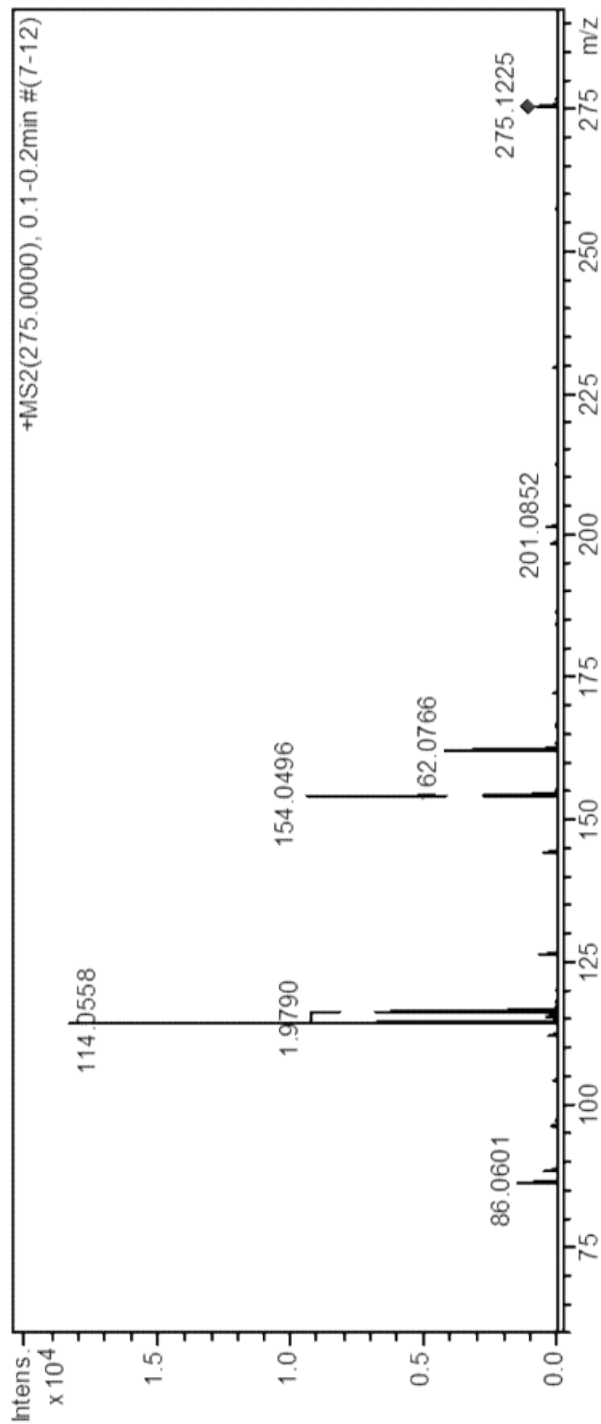

| Meas. m/z | Formula           | m/z      | err [ppm] | rdb | N-Rule | Conf                    |
|-----------|-------------------|----------|-----------|-----|--------|-------------------------|
| 86.0601   | C 4 H 8 N O       | 86.0600  | -0.5      | 1.5 | ok     | even ruptura αCOO       |
| 88.0392   | C 3 H 6 N O 2     | 88.0393  | 0.9       | 1.5 | ok     | even ruptura αCON       |
| 114.0558  | C 5 H 8 N O 2     | 114.0550 | -7.5      | 2.5 | ok     | even ruptura COO←       |
| 116.0348  | C 4 H 6 N O 3     | 116.0342 | -5.4      | 2.5 | ok     | even ruptura CON→       |
| 154.0496  | C 7 H 8 N O 3     | 154.0499 | 2.0       | 4.5 | ok     | even X                  |
| 162.0766  | C 6 H 12 N O 4    | 162.0761 | -2.9      | 1.5 | ok     | even ruptura COO→       |
| 275.1225  | C 11 H 19 N 2 O 6 | 275.1238 | 4.5       | 3.5 | ok     | even [M+H] <sup>+</sup> |

<sup>1</sup>H-NRM (500 MHz) for compound 2-(diethoxyphosphorylmethylamino)-2-oxoethyl-5-aminolevulinate (**1b**)

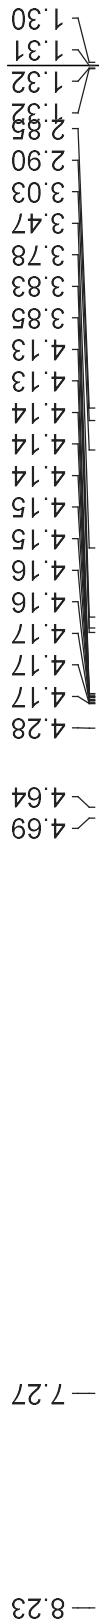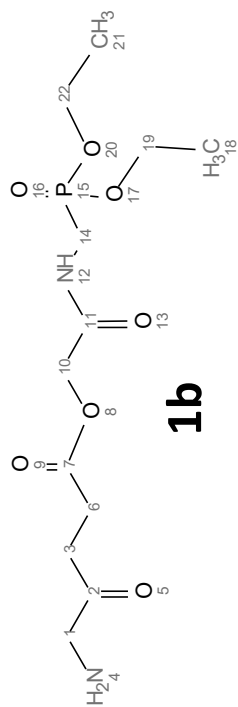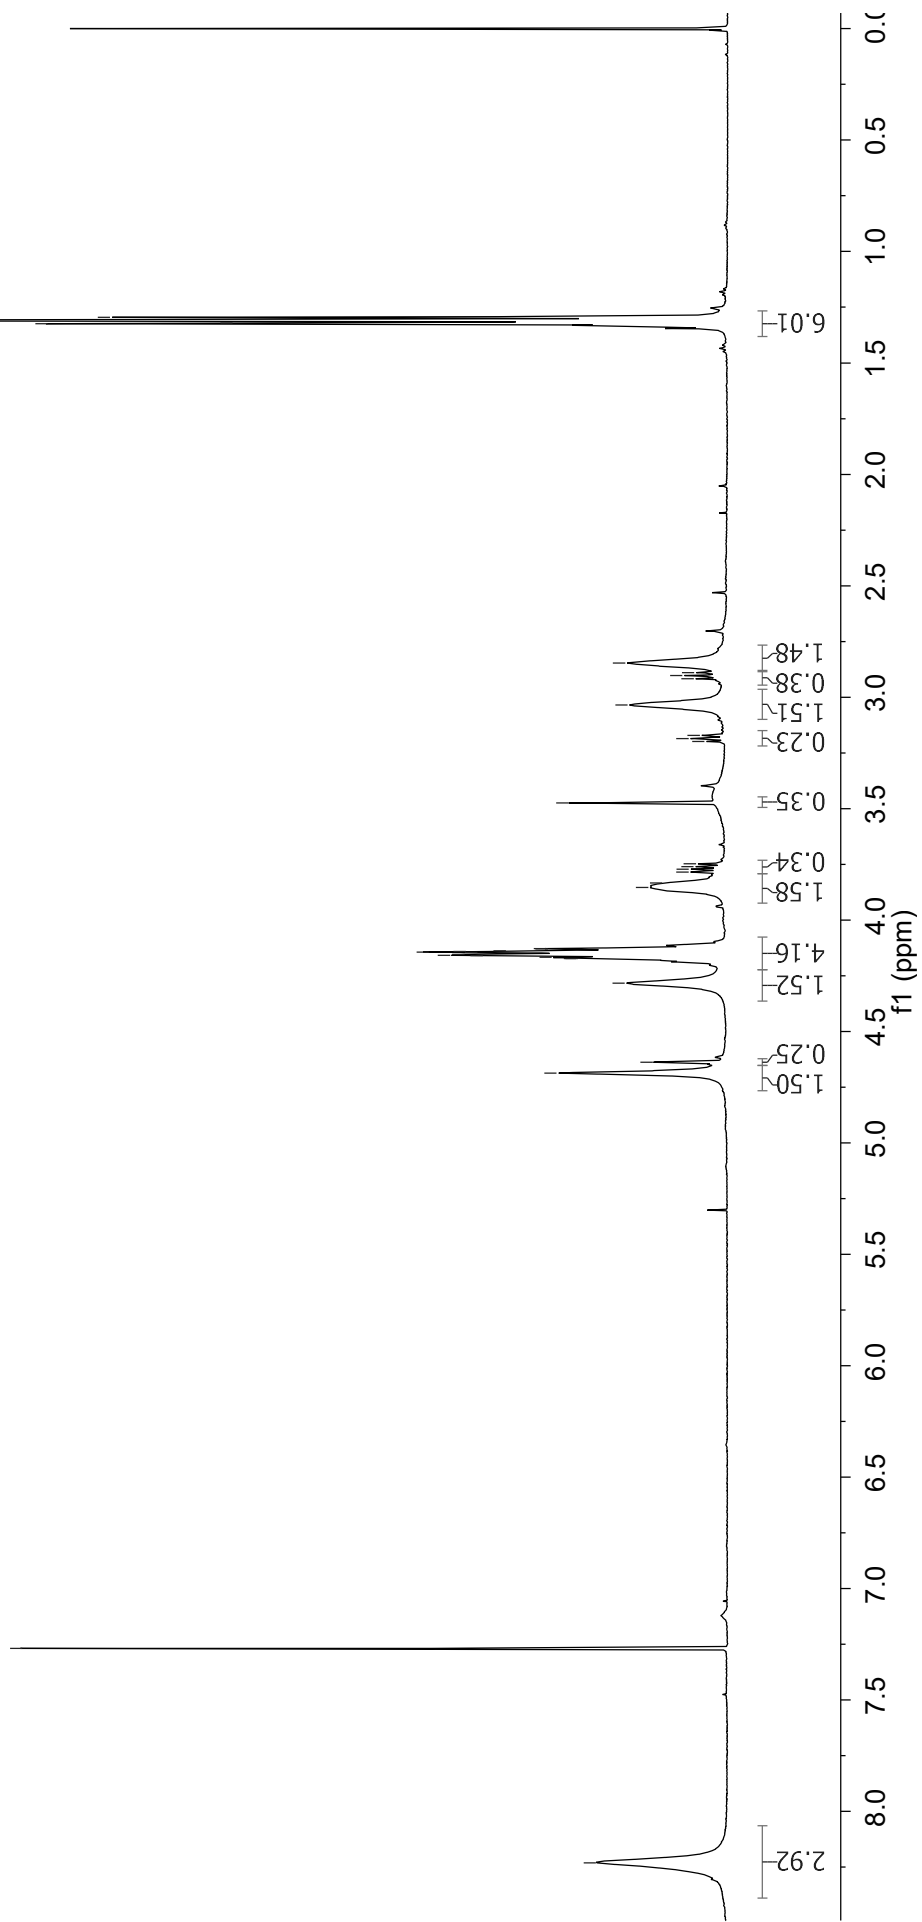

<sup>13</sup>C-NRM (125,7 MHz) for compound **1b**

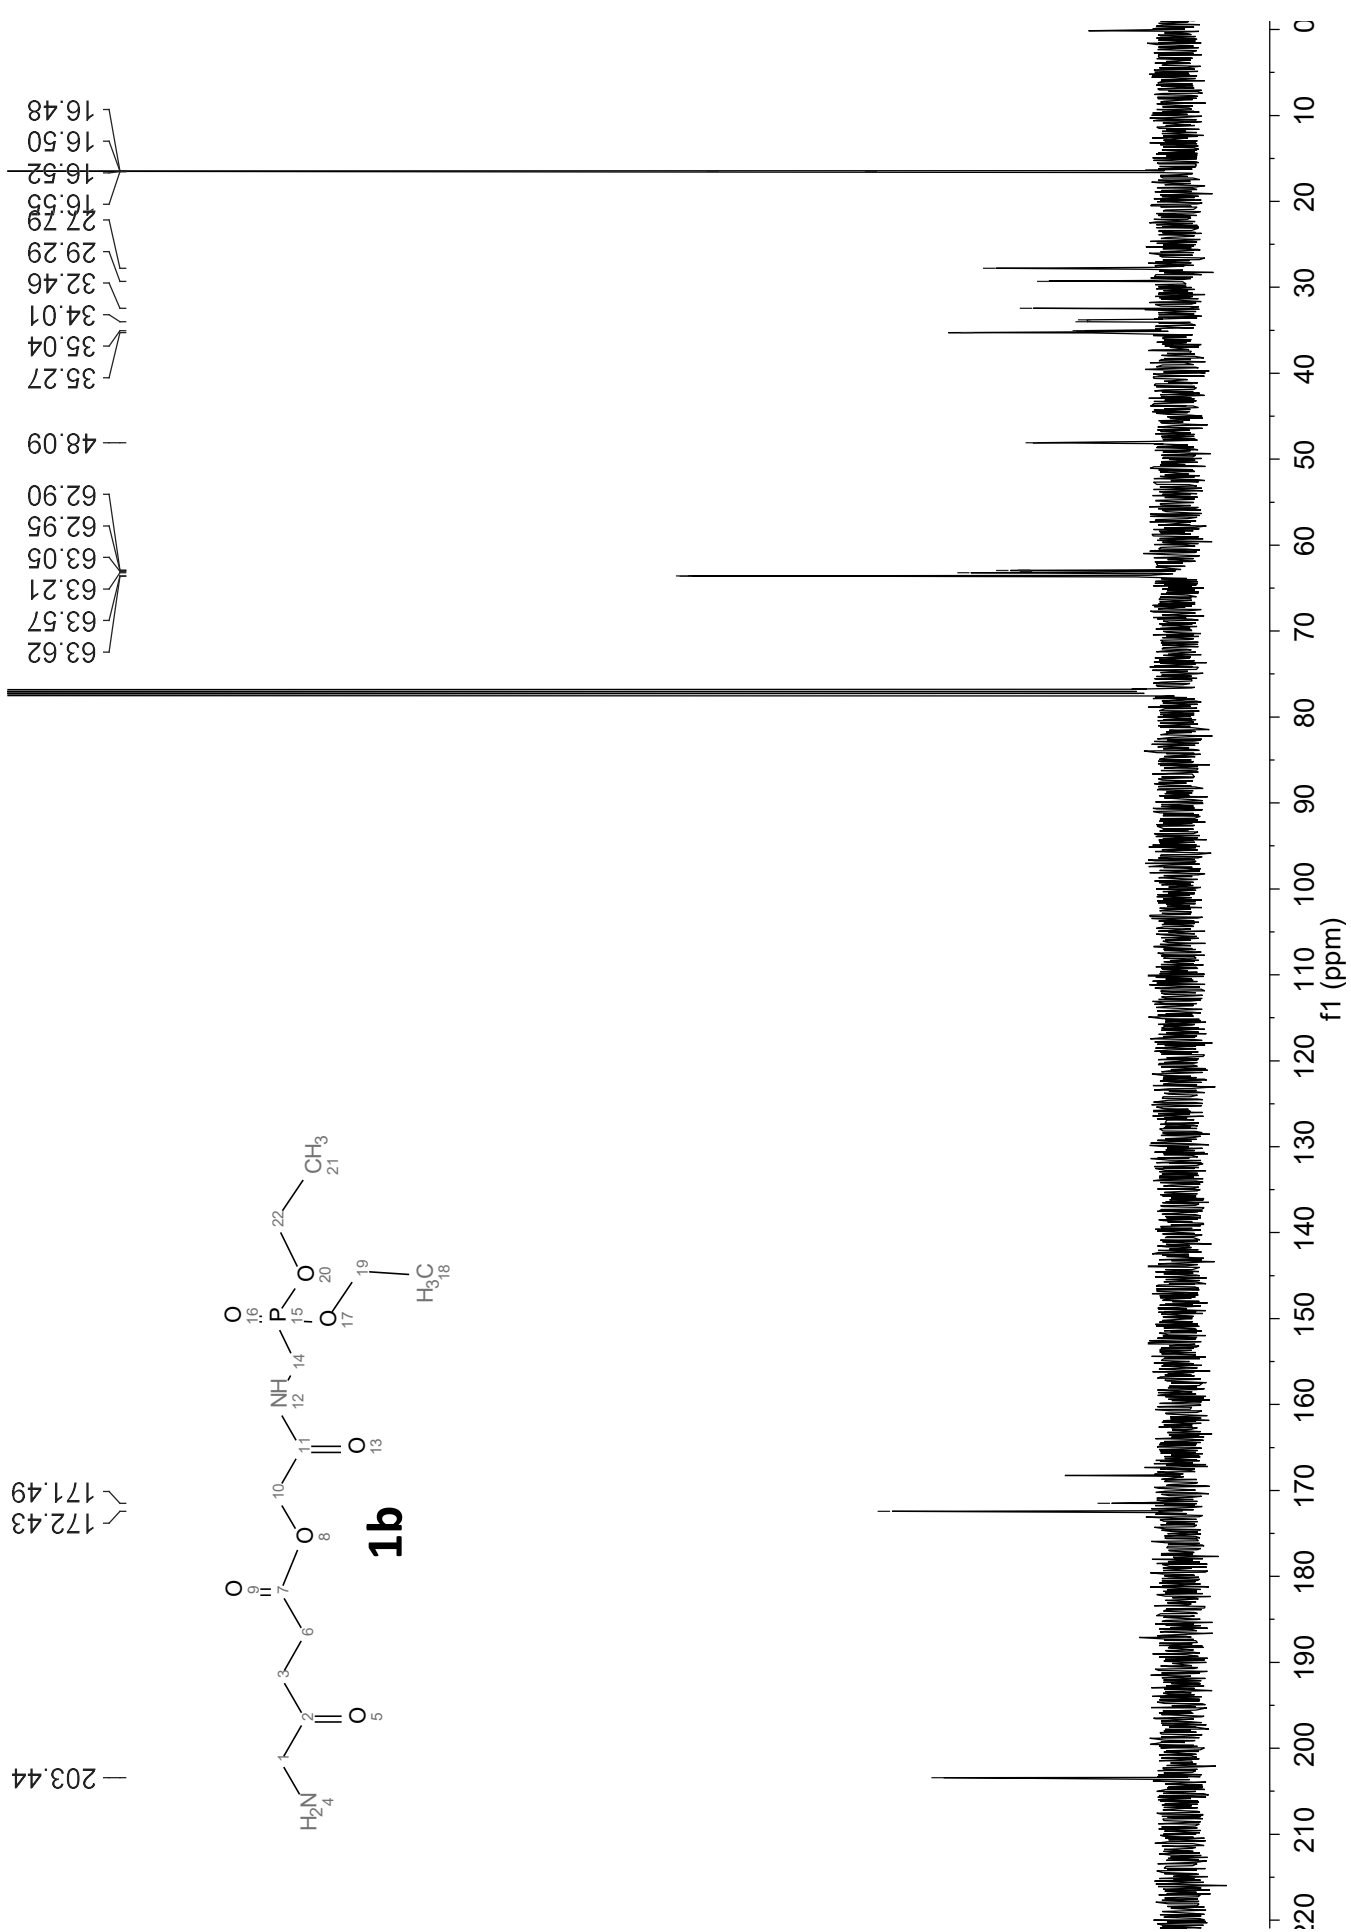

# HSQC-DEPT (500 MHz) for compound **1b**

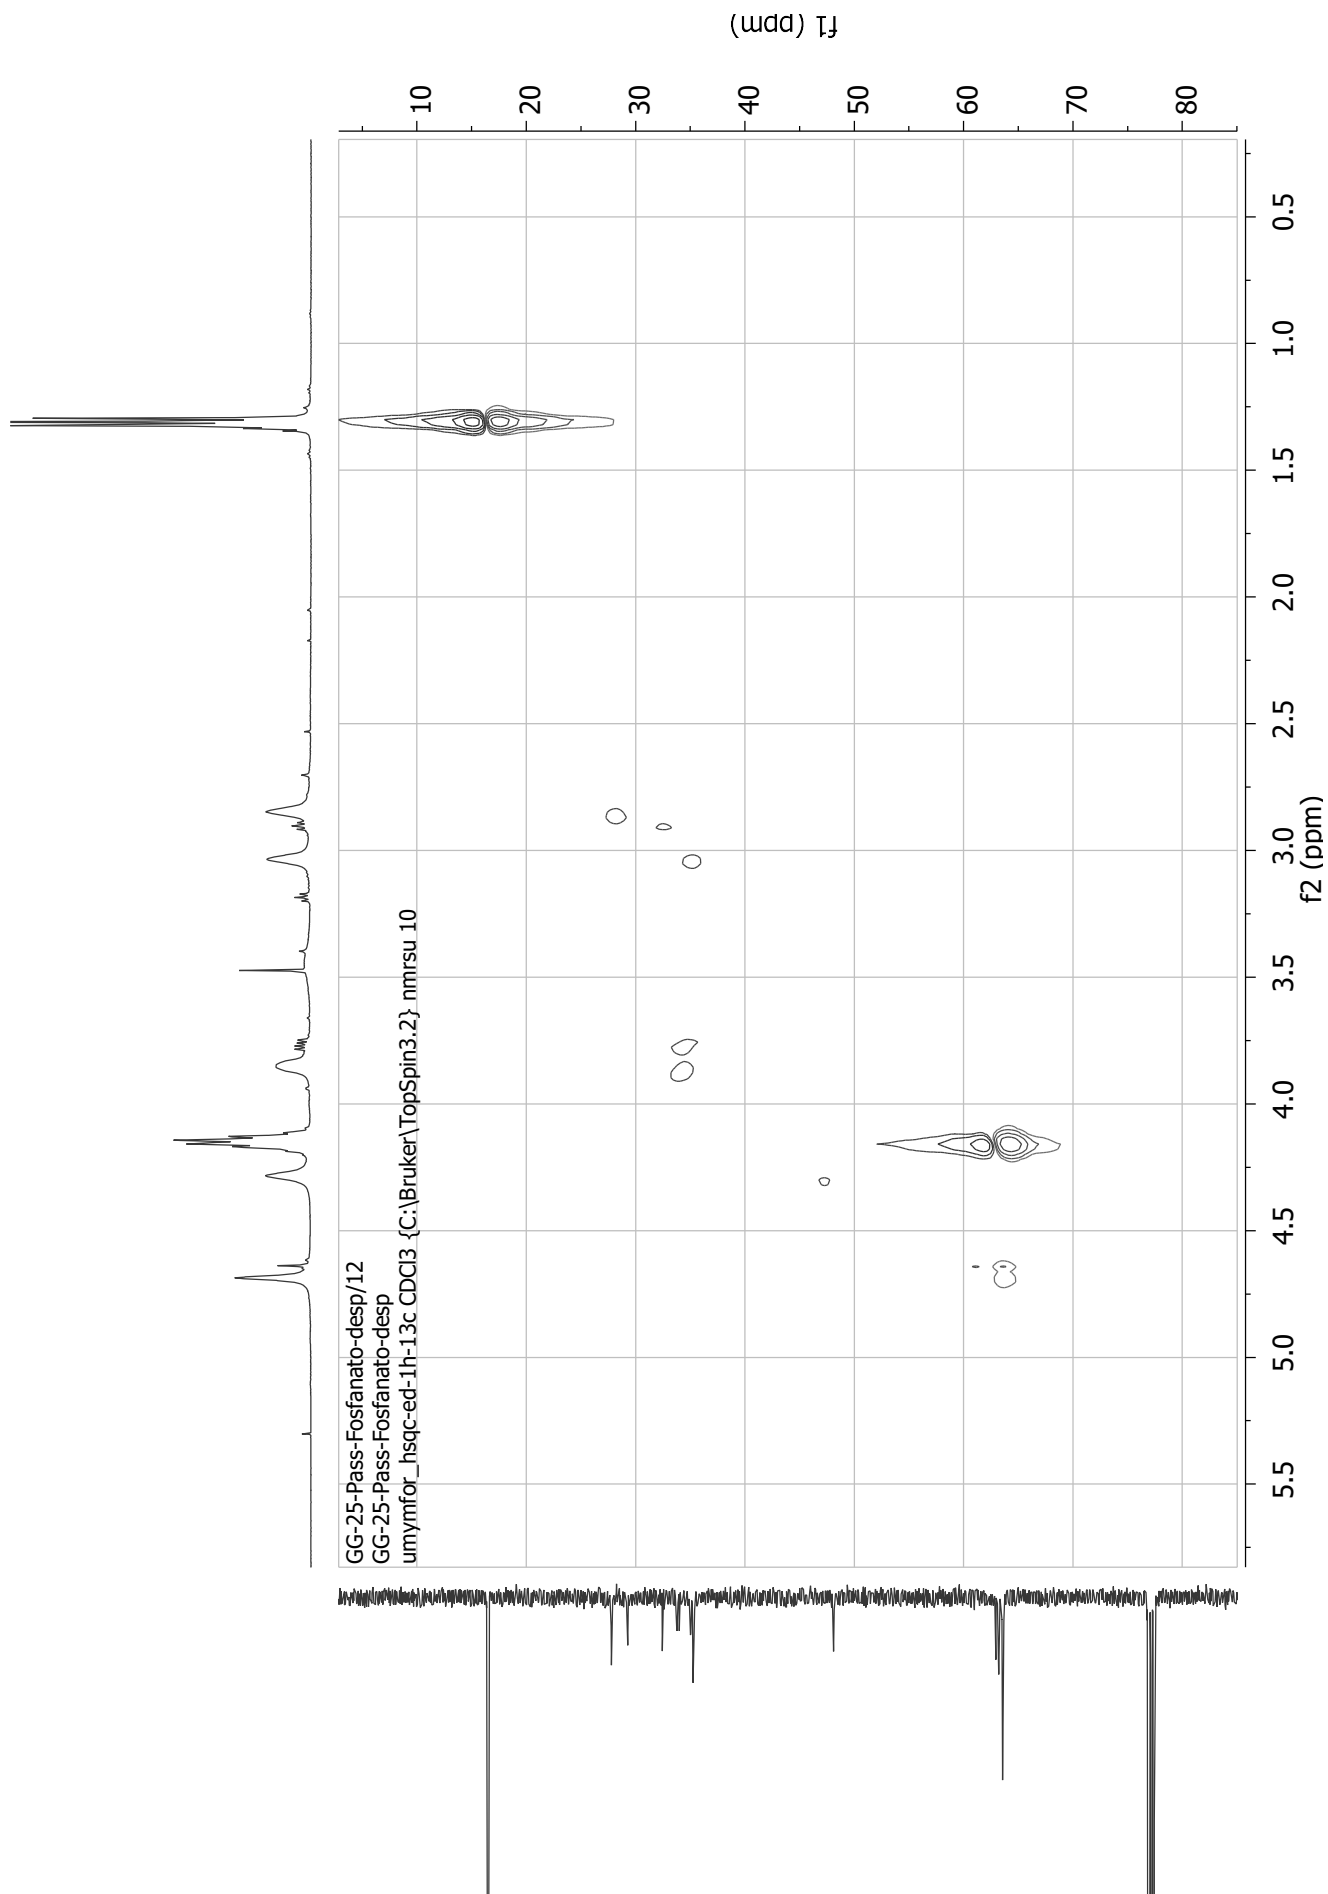

HMBC (500 MHz) for compound **1b**

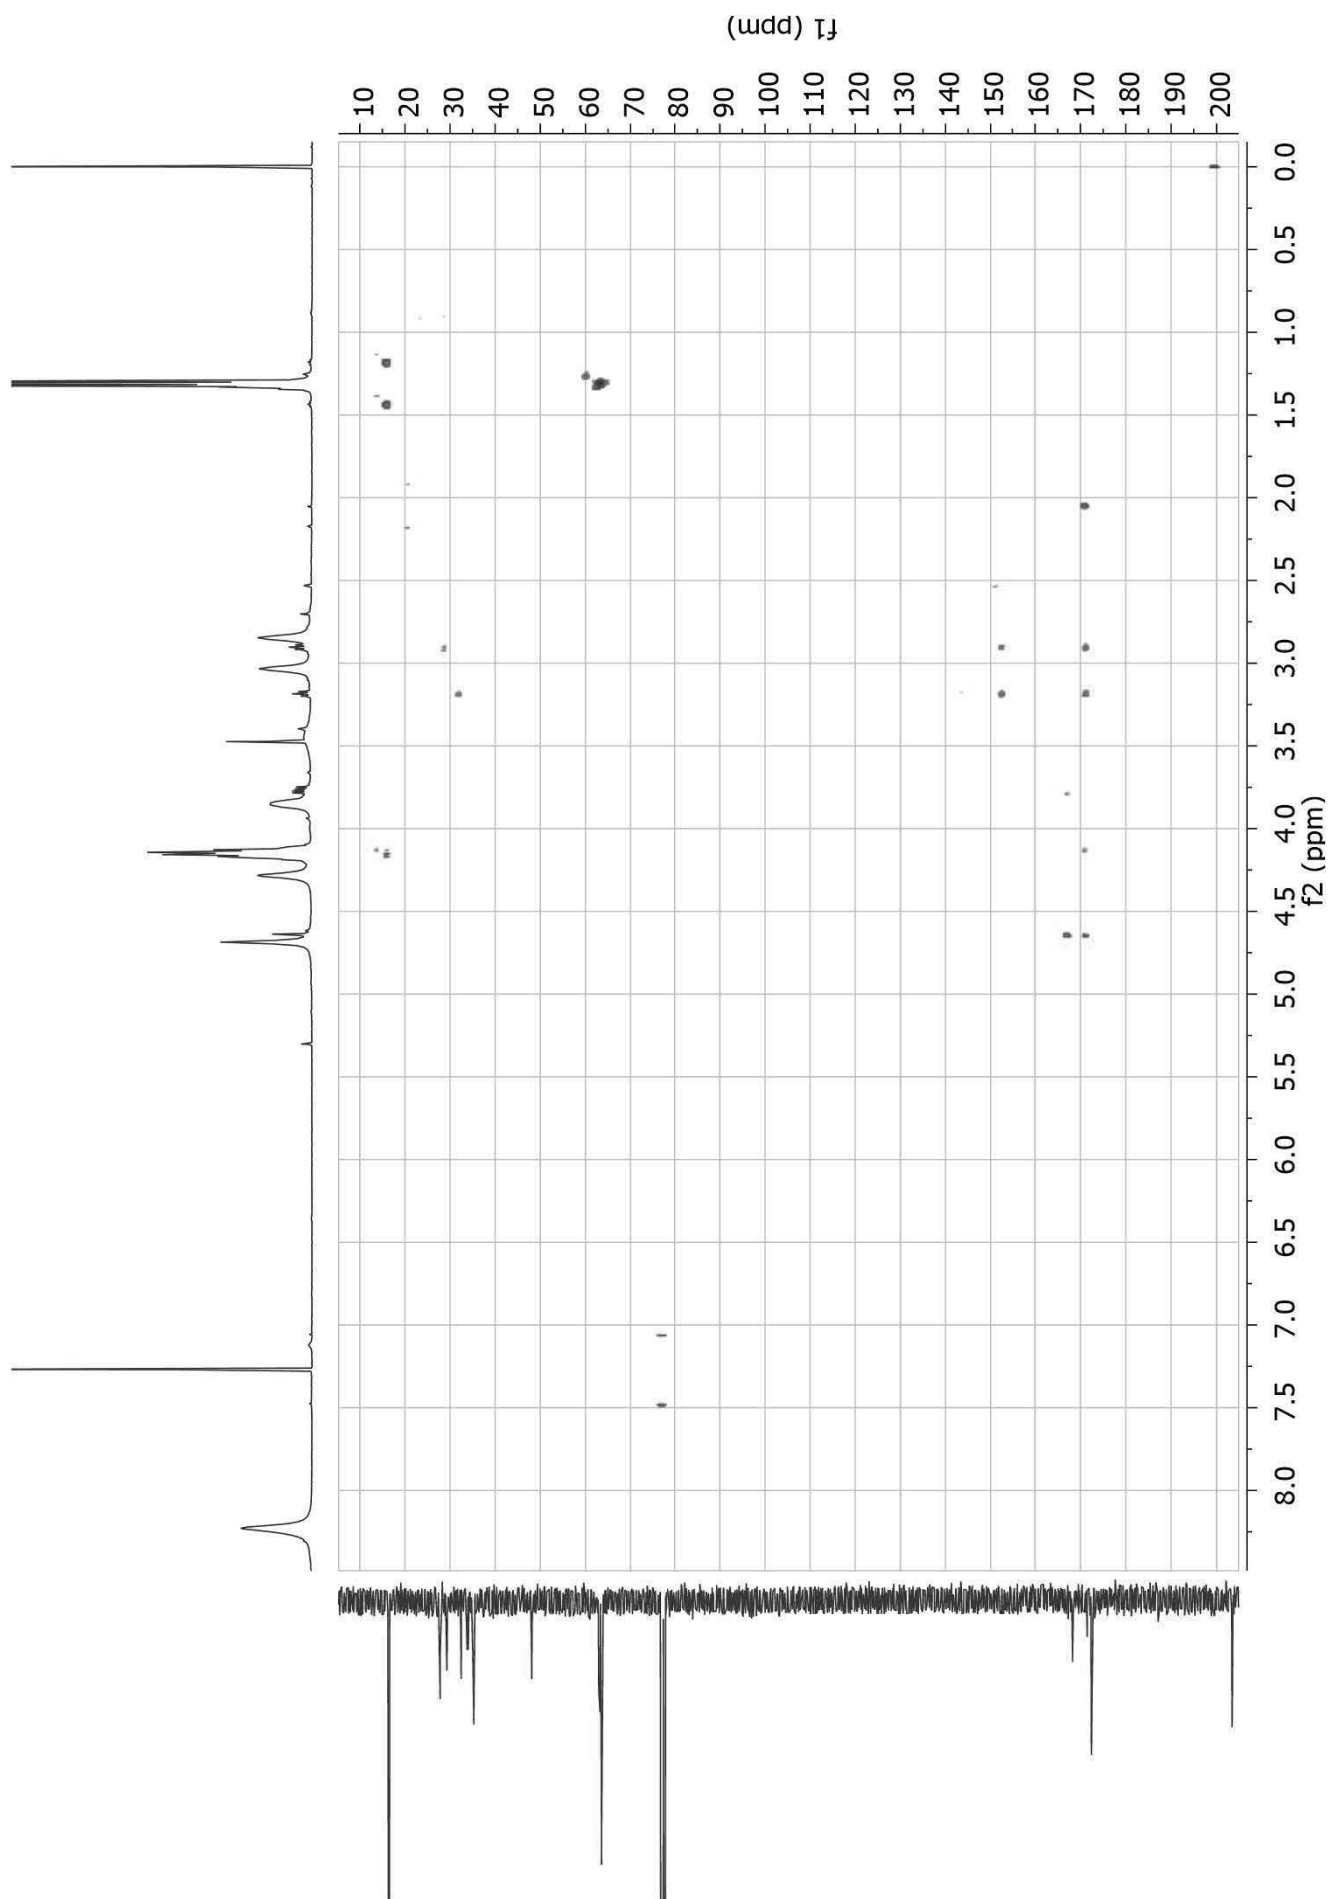



# ESI MS/MS spectrum of m/z ([M+H]<sup>+</sup> cation of compound **1b** (collision Energy 10 eV)

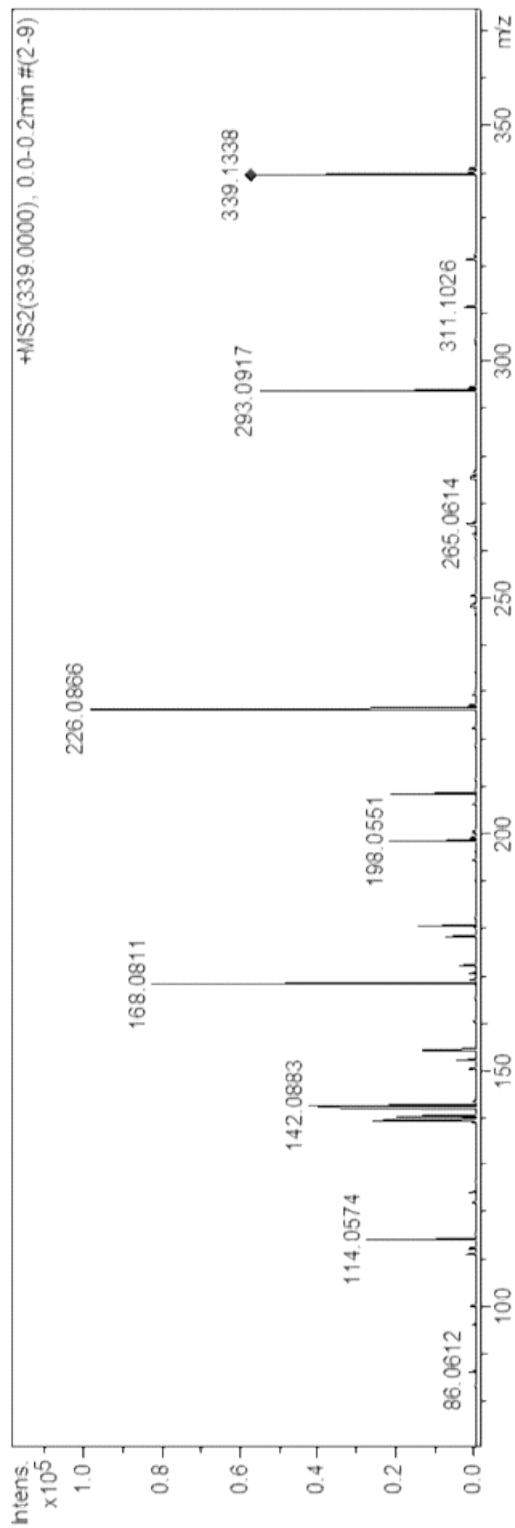

| Meas. m/z | Formula                                                         | m/z      | err [ppm] | rdb | N-Rule | e <sup>-</sup> Conf |
|-----------|-----------------------------------------------------------------|----------|-----------|-----|--------|---------------------|
| 114.0574  |                                                                 |          |           |     |        |                     |
| 139.0540  | C <sub>11</sub> H <sub>7</sub>                                  | 139.0542 | 1.4       | 8.5 | ok     | even                |
|           | C <sub>7</sub> H <sub>10</sub> N P                              | 139.0545 | 3.6       | 4.0 | ok     | odd                 |
| 142.0883  | C <sub>7</sub> H <sub>12</sub> N O <sub>2</sub>                 | 142.0863 | -14.5     | 2.5 | ok     | even                |
| 154.0518  | C <sub>7</sub> H <sub>8</sub> N O <sub>3</sub>                  | 154.0499 | -12.8     | 4.5 | ok     | even                |
| 168.0811  | C <sub>8</sub> H <sub>13</sub> N <sub>2</sub> P                 | 168.0811 | 0.0       | 4.0 | ok     | odd                 |
|           | C <sub>12</sub> H <sub>10</sub> N                               | 168.0808 | -1.8      | 8.5 | ok     | even                |
| 180.0445  | C <sub>5</sub> H <sub>11</sub> N O <sub>4</sub> P               | 180.0420 | -13.9     | 1.5 | ok     | even                |
| 198.0551  | C <sub>5</sub> H <sub>13</sub> N O <sub>5</sub> P               | 198.0526 | -12.7     | 0.5 | ok     | even                |
| 208.0756  | C <sub>7</sub> H <sub>15</sub> N O <sub>4</sub> P               | 208.0733 | -10.8     | 1.5 | ok     | even                |
| 226.0866  | C <sub>7</sub> H <sub>17</sub> N O <sub>5</sub> P               | 226.0839 | -12.0     | 0.5 | ok     | even                |
| 293.0917  | C <sub>10</sub> H <sub>18</sub> N <sub>2</sub> O <sub>6</sub> P | 293.0897 | -6.9      | 3.5 | ok     | even                |
| 339.1338  | C <sub>12</sub> H <sub>24</sub> N <sub>2</sub> O <sub>7</sub> P | 339.1316 | -6.4      | 2.5 | ok     | even                |

<sup>1</sup>H-NRM (500 MHz) for compound 2-(3,4-dimethoxyphenethylamino)-2-oxoethyl-5-aminolevulinate (**1c**)

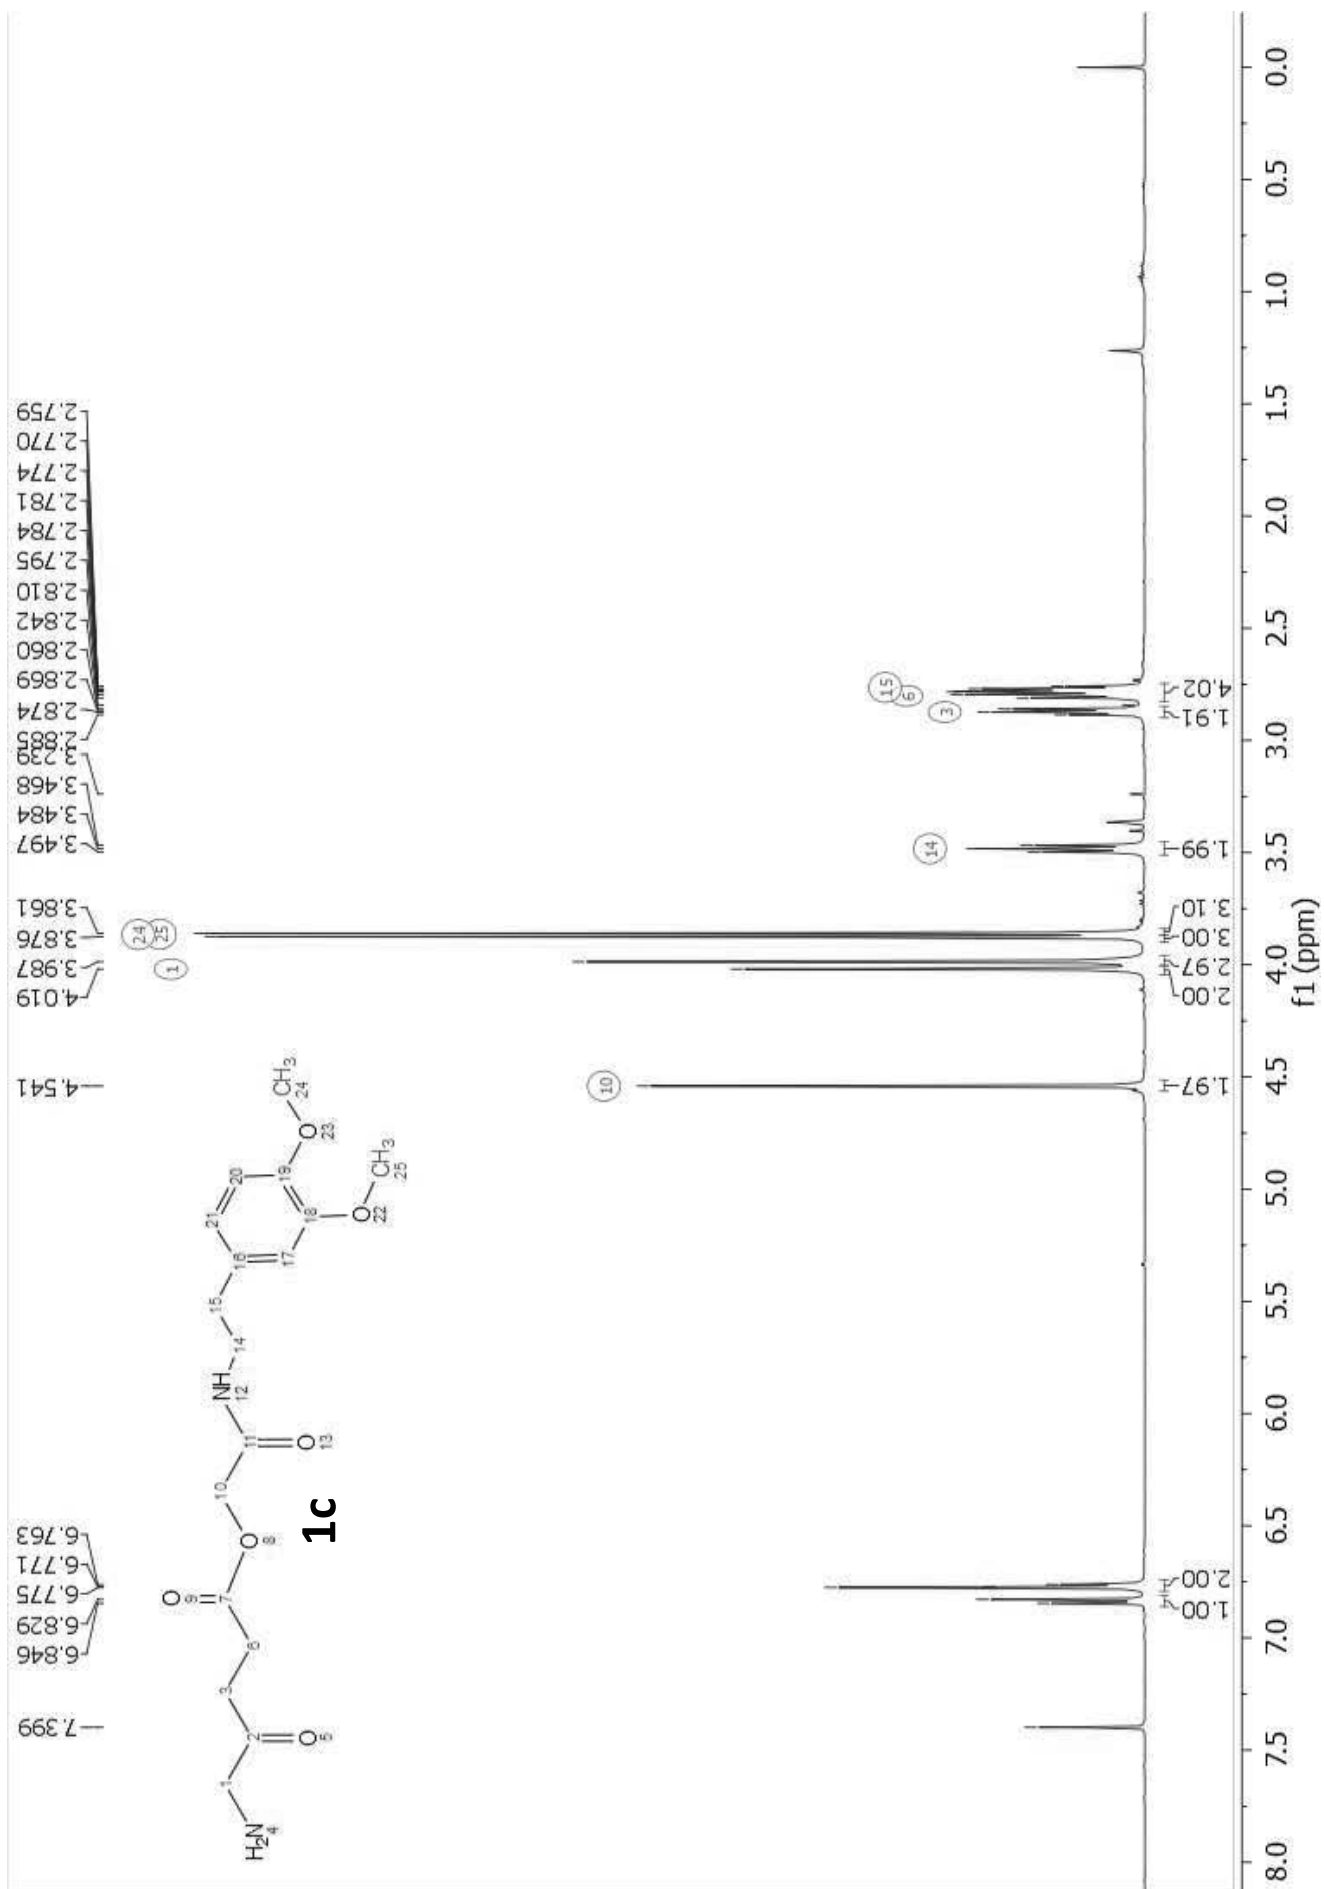

<sup>13</sup>C-NRM (125,7 MHz) for compound **1c**

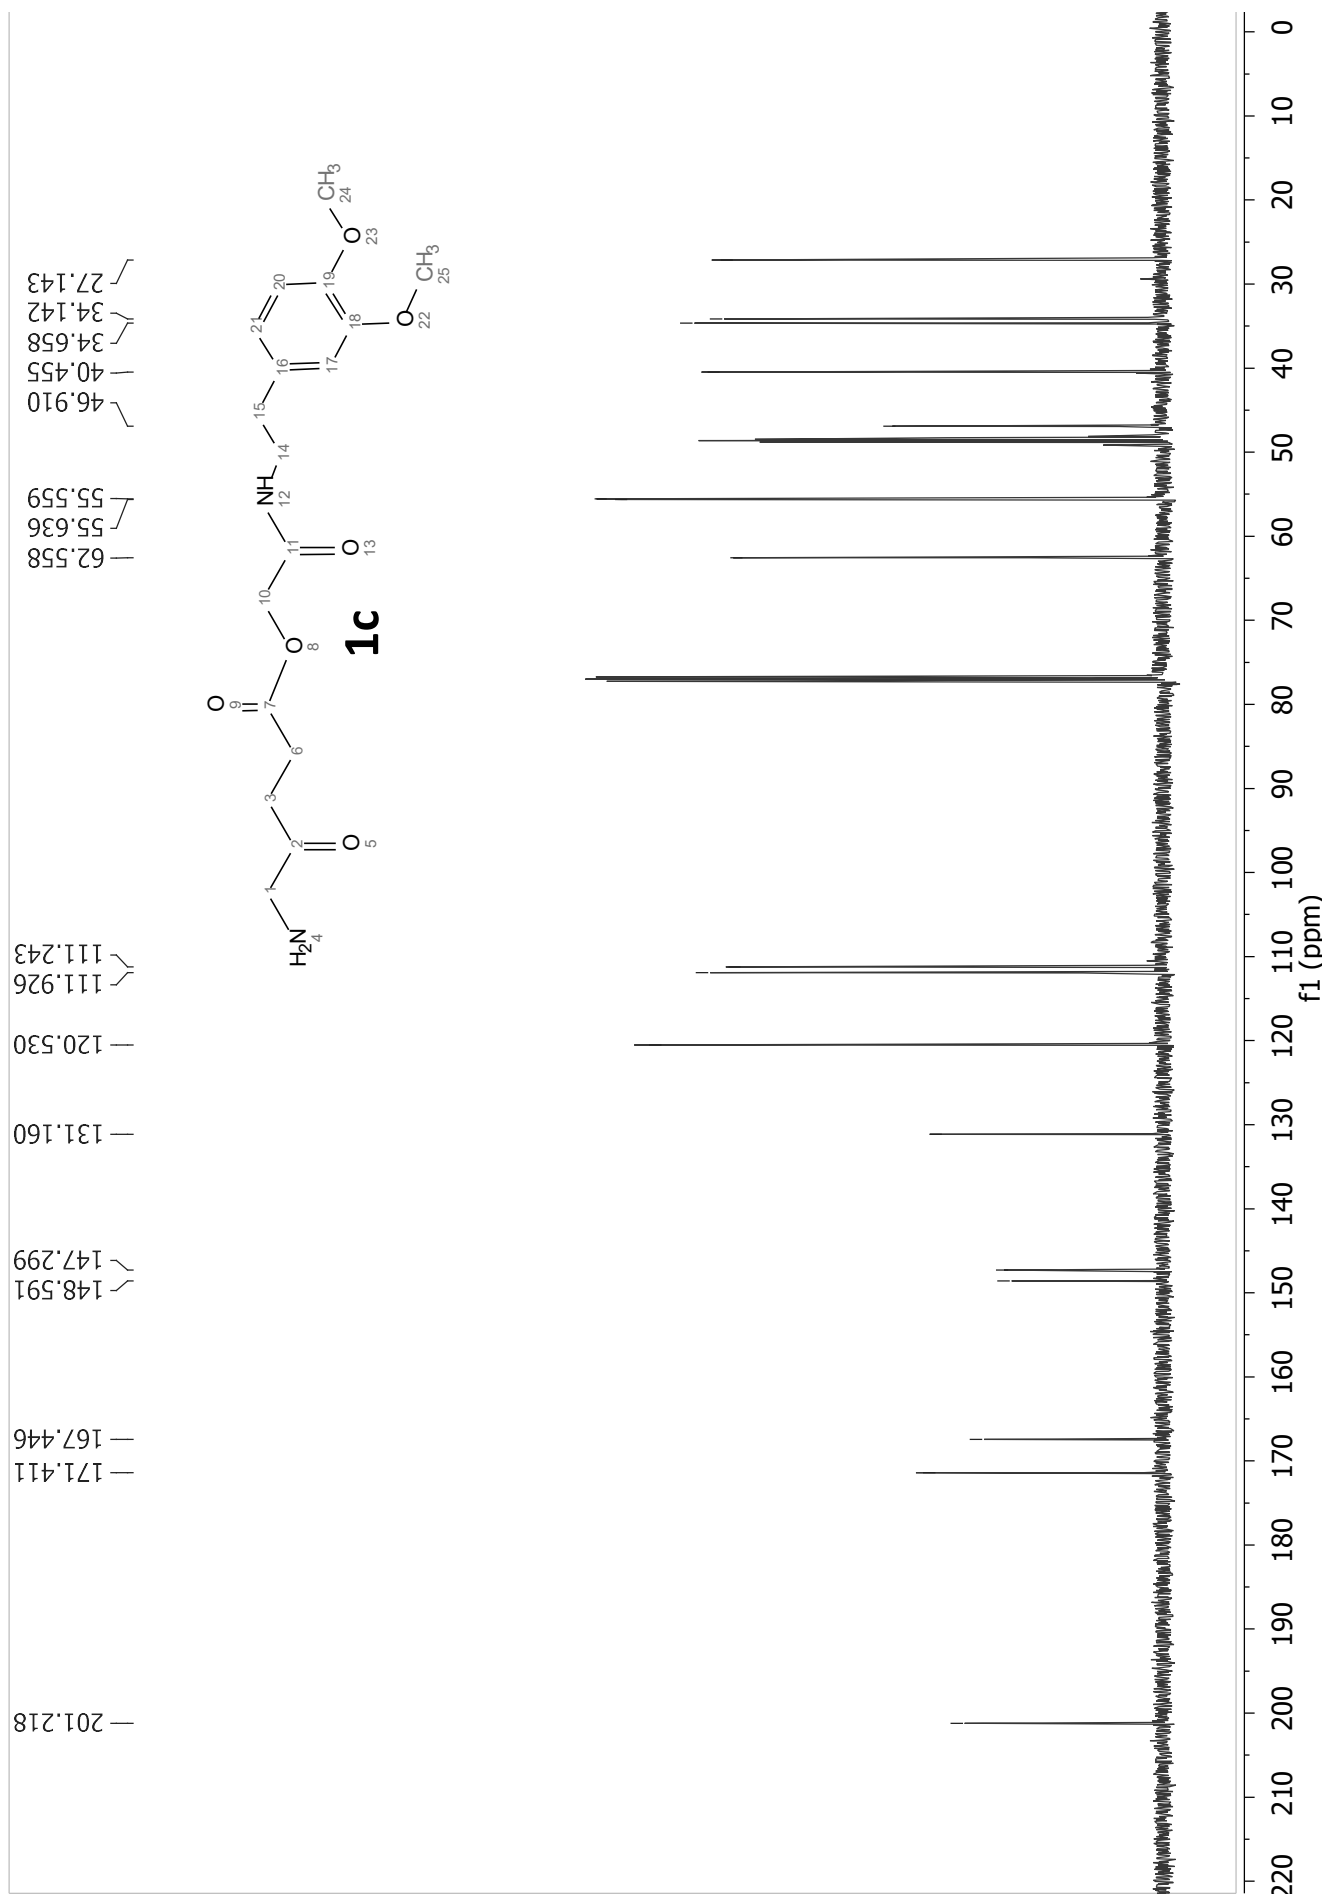

# HSQC-DEPT (500 MHz) for compound **1c**

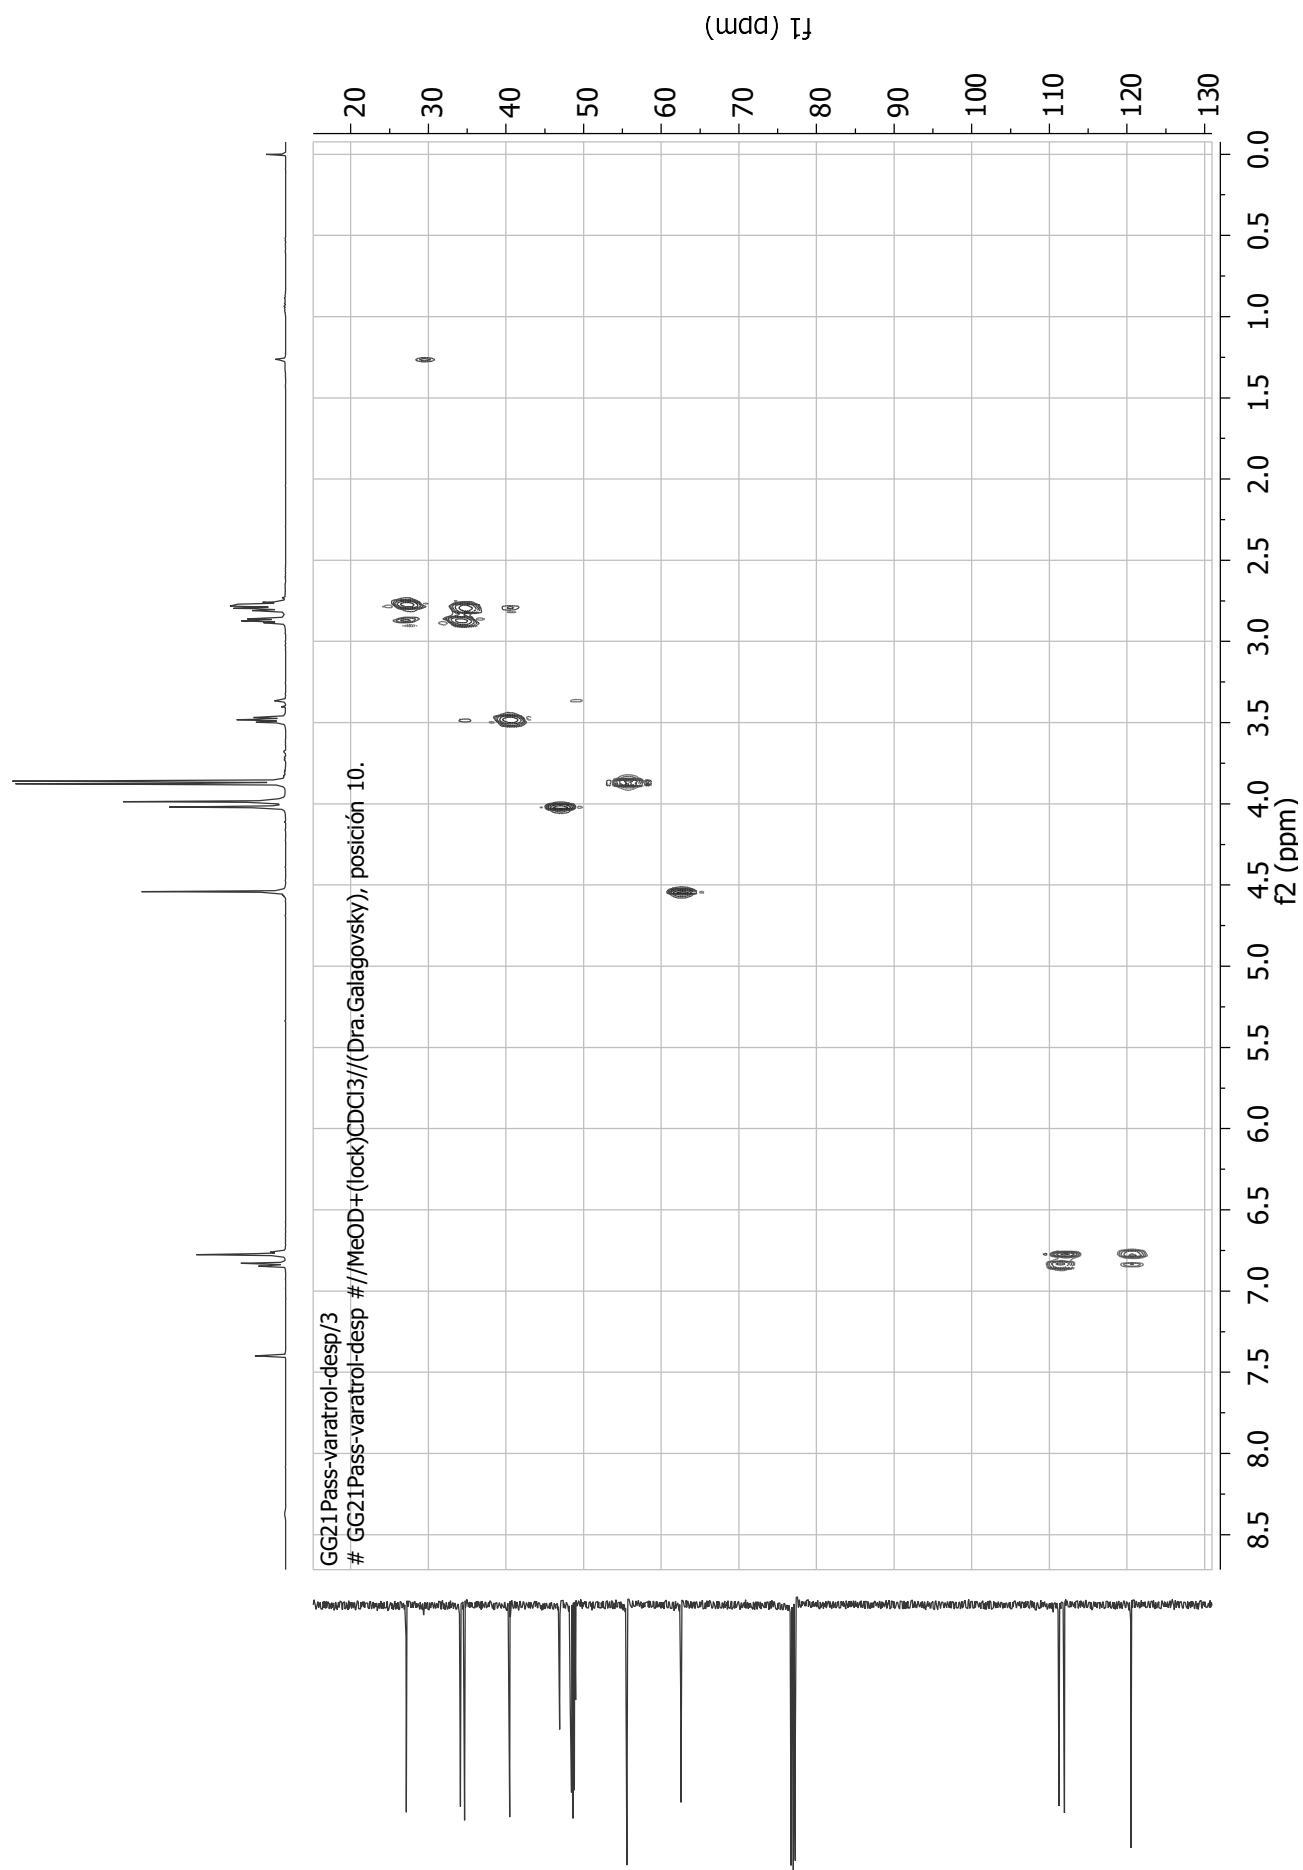

# HMBC (500 MHz) for compound **1c**

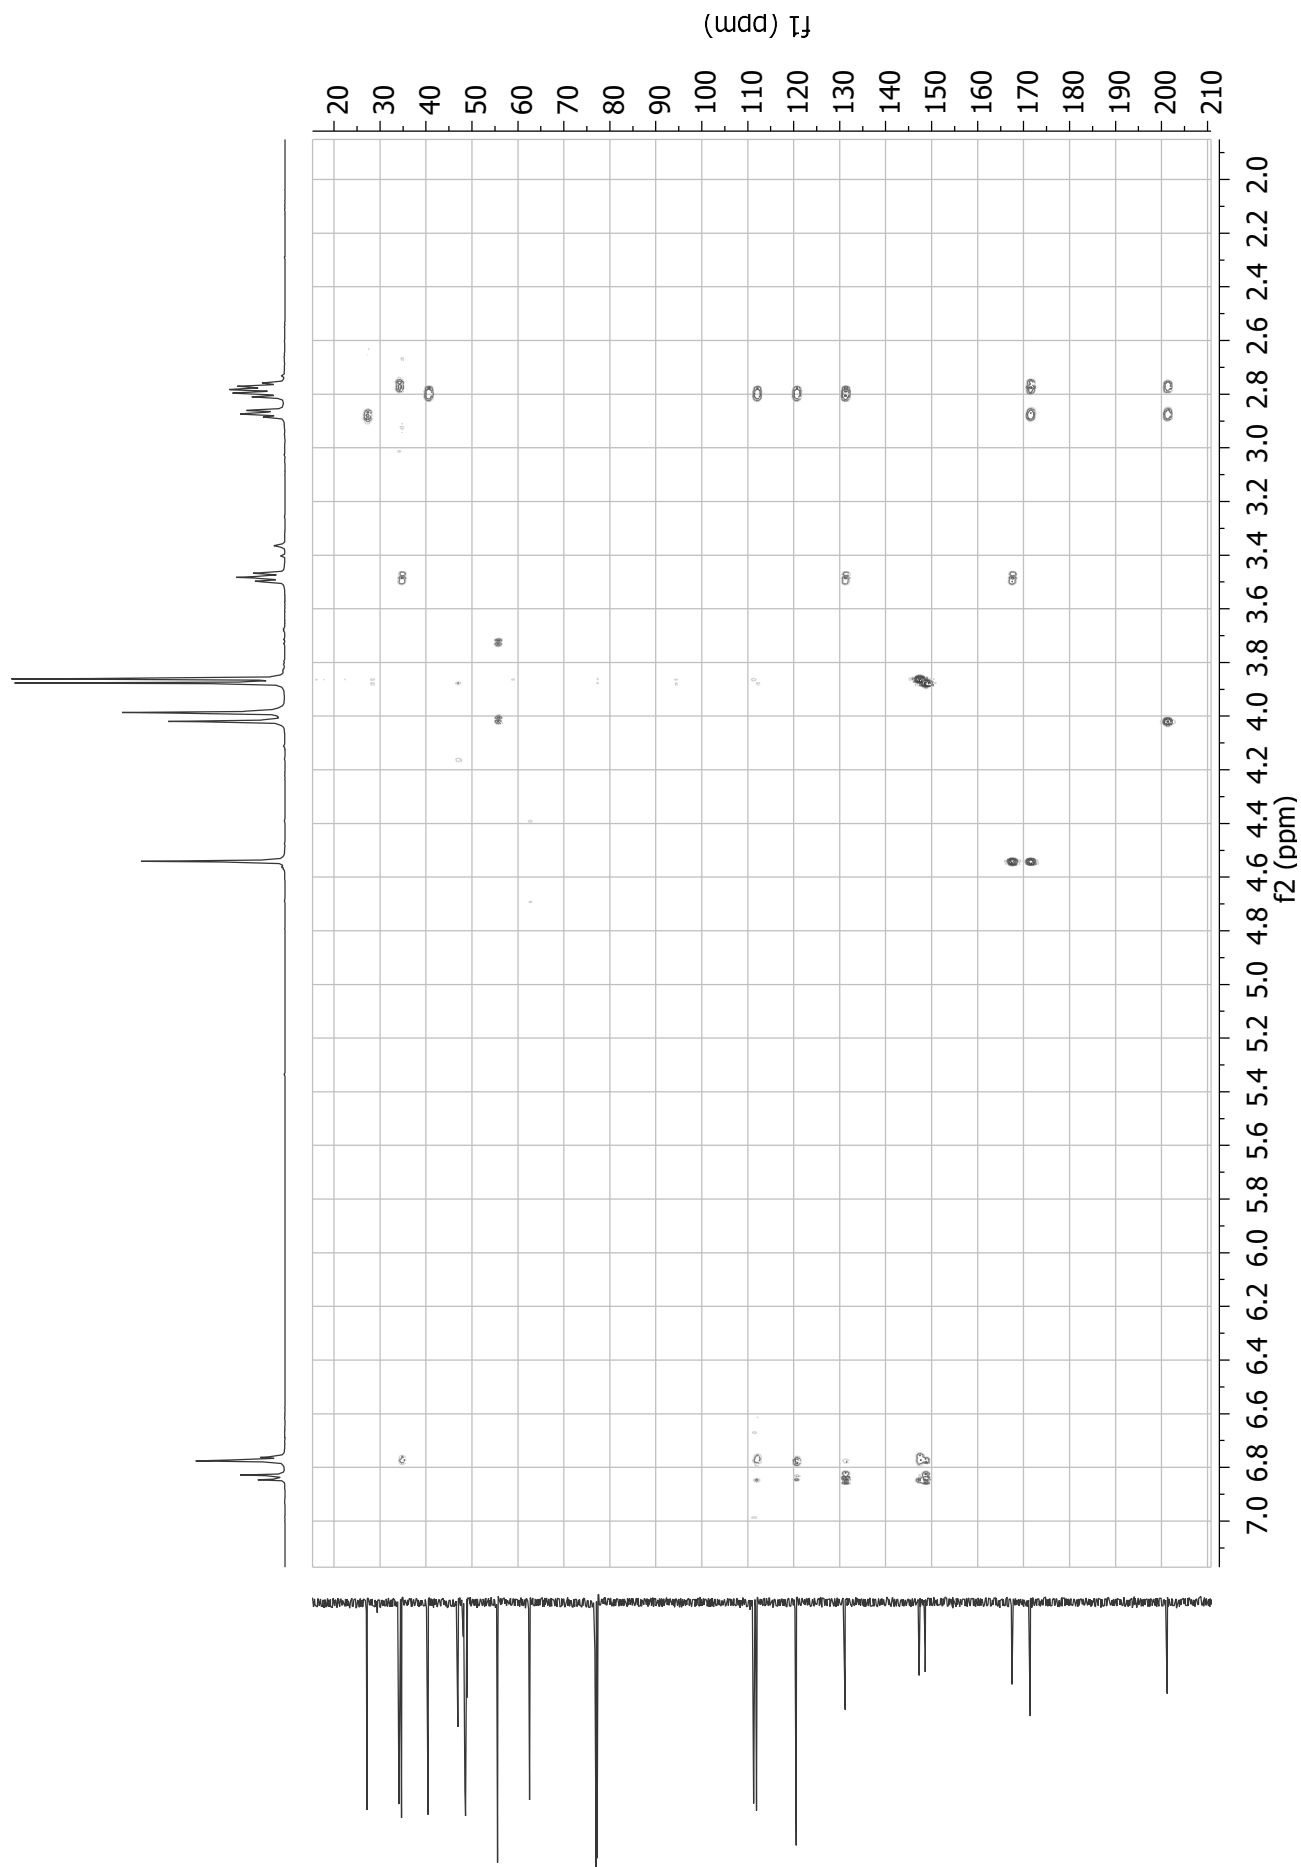

ESI MS/MS spectrum of m/z ([M+H]<sup>+</sup> cation of compound **1c** (collision Energy 15 eV)

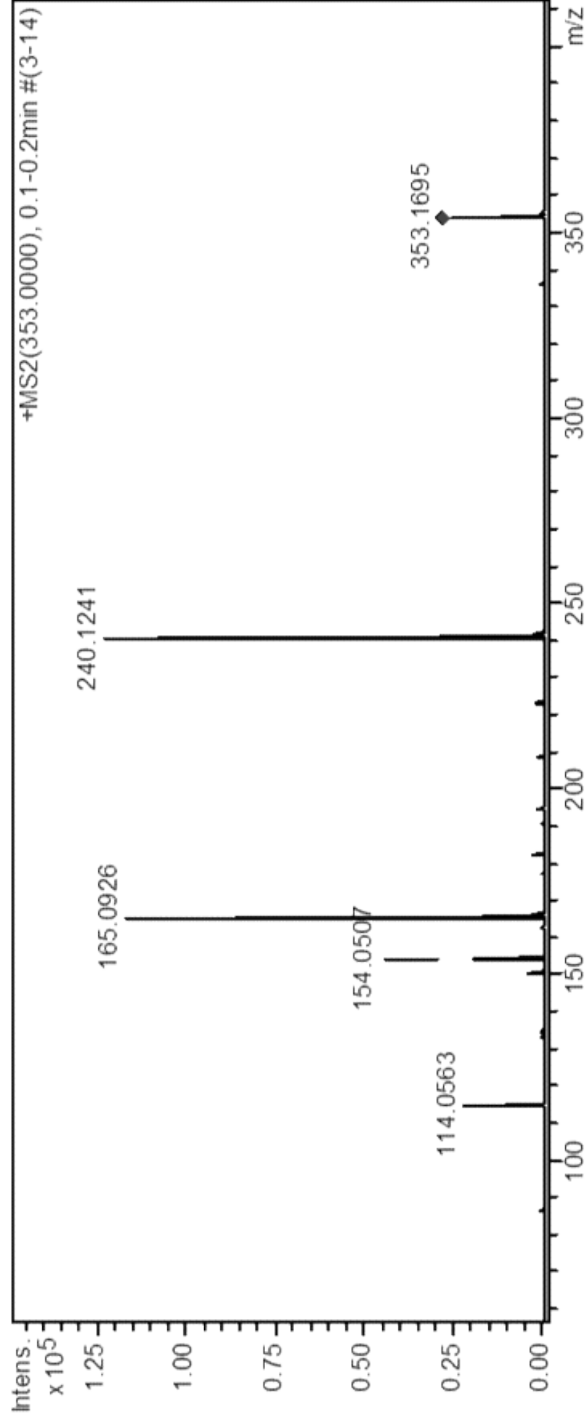

| Meas. m/z | Formula           | m/z      | err [ppm] | rdb | N-Rule e <sup>-</sup> Conf |
|-----------|-------------------|----------|-----------|-----|----------------------------|
| 114.0563  | C 5 H 8 N O 2     | 114.0550 | -12.1     | 2.5 | ok even ruptura CO-O←      |
| 154.0507  | C 7 H 8 N O 3     | 154.0499 | -5.4      | 4.5 | ok even X                  |
| 165.0926  | C 10 H 13 O 2     | 165.0910 | -9.7      | 4.5 | ok even ruptura α NH→      |
| 240.1241  | C 12 H 18 N O 4   | 240.1230 | -4.4      | 4.5 | ok even ruptura CO-O→      |
| 353.1695  | C 17 H 25 N 2 O 6 | 353.1707 | 3.4       | 6.5 | ok even [M+H] <sup>+</sup> |

<sup>1</sup>H-NRM (500 MHz) for compound 2-(*t*-butylamino)-2-oxoethyl-5-aminolevulinate (**1d**)

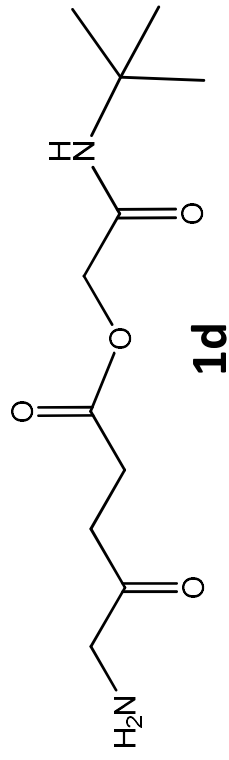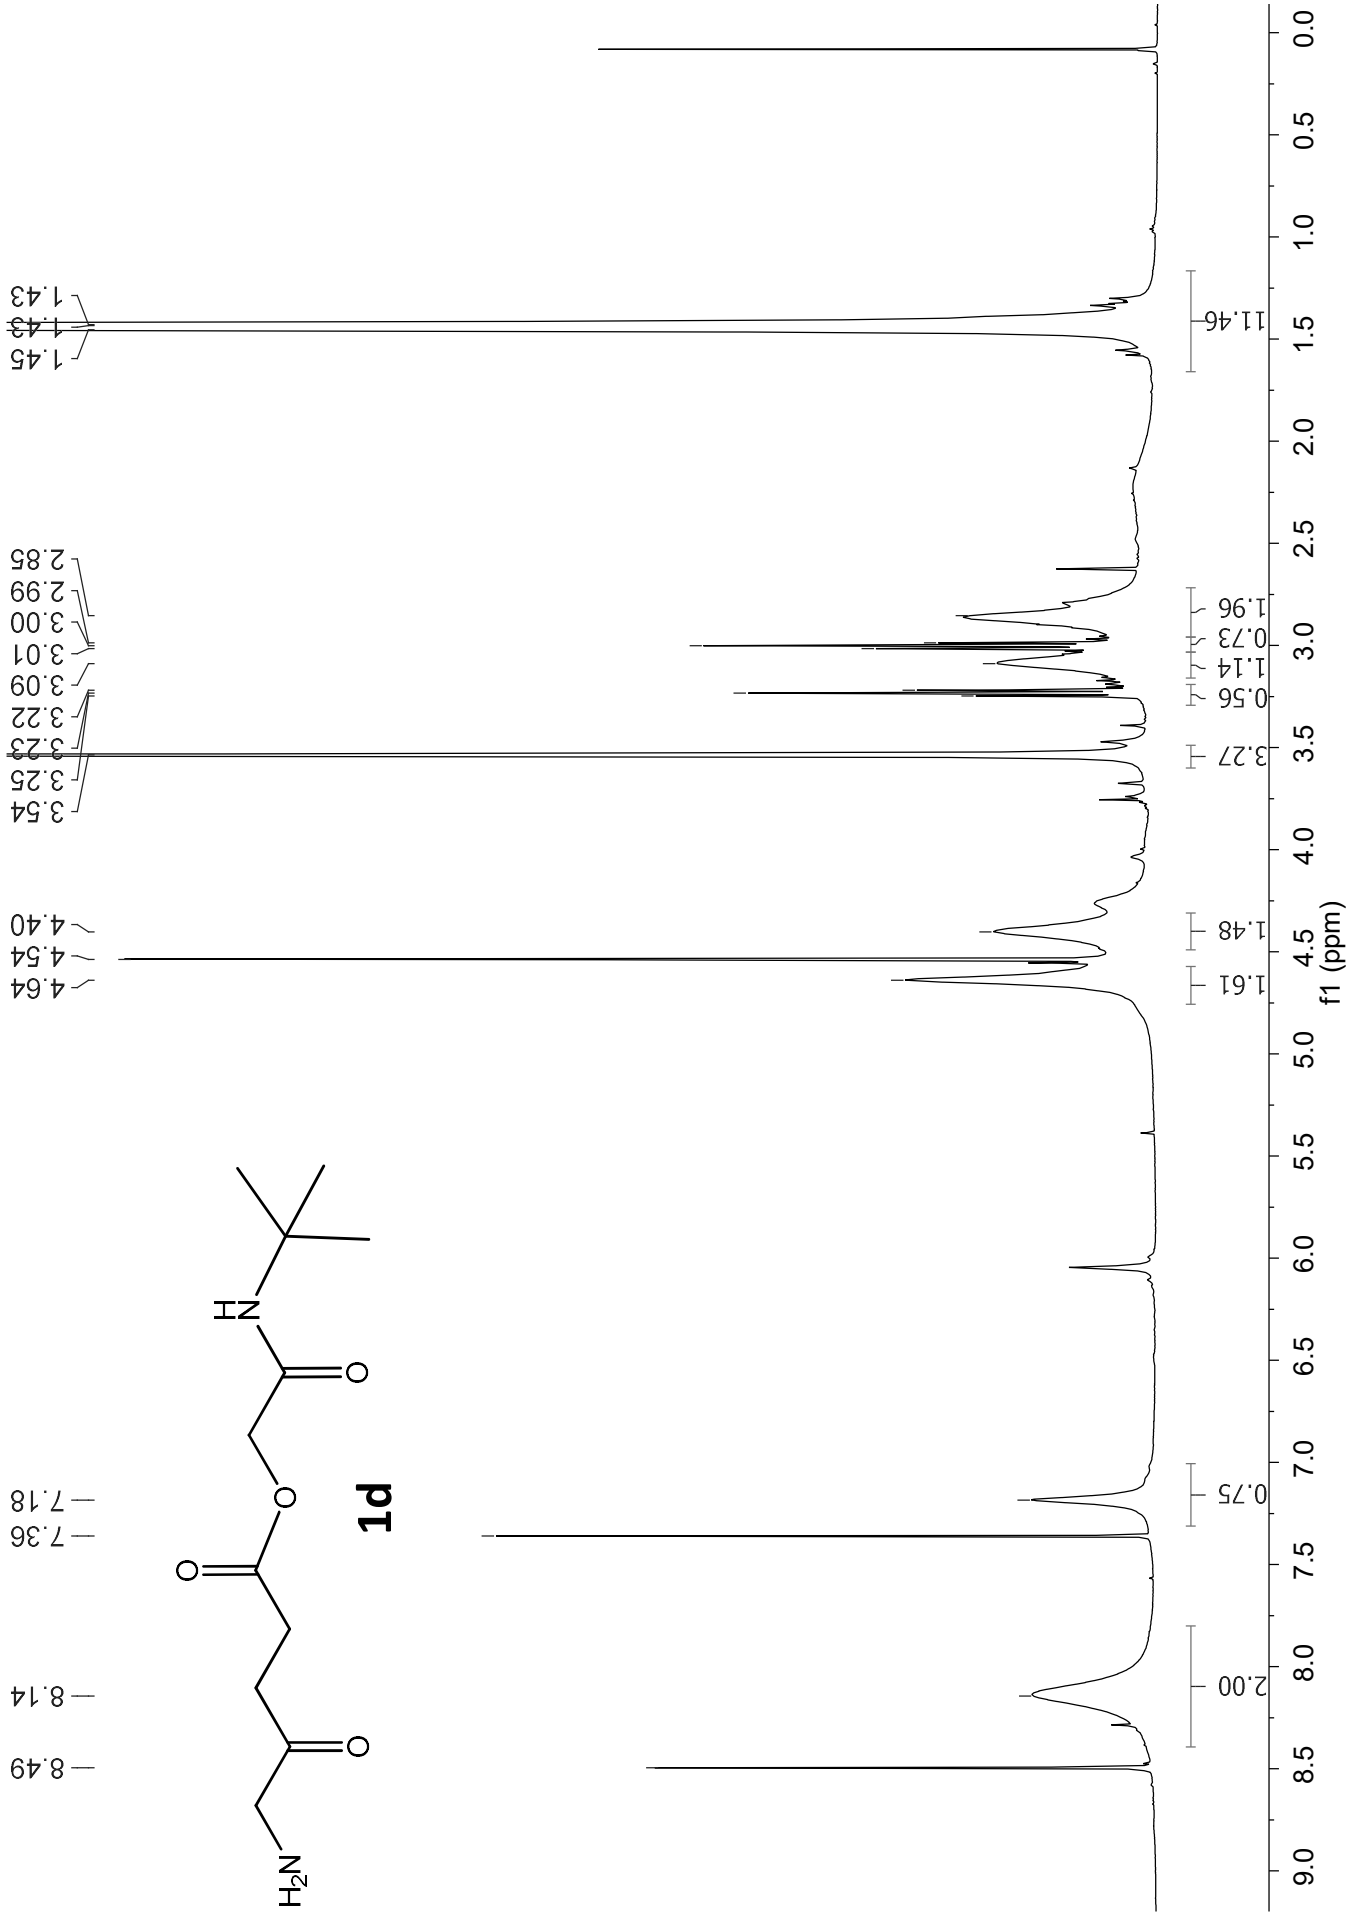

<sup>13</sup>C-NRM (125,7 MHz) for compound **1d**

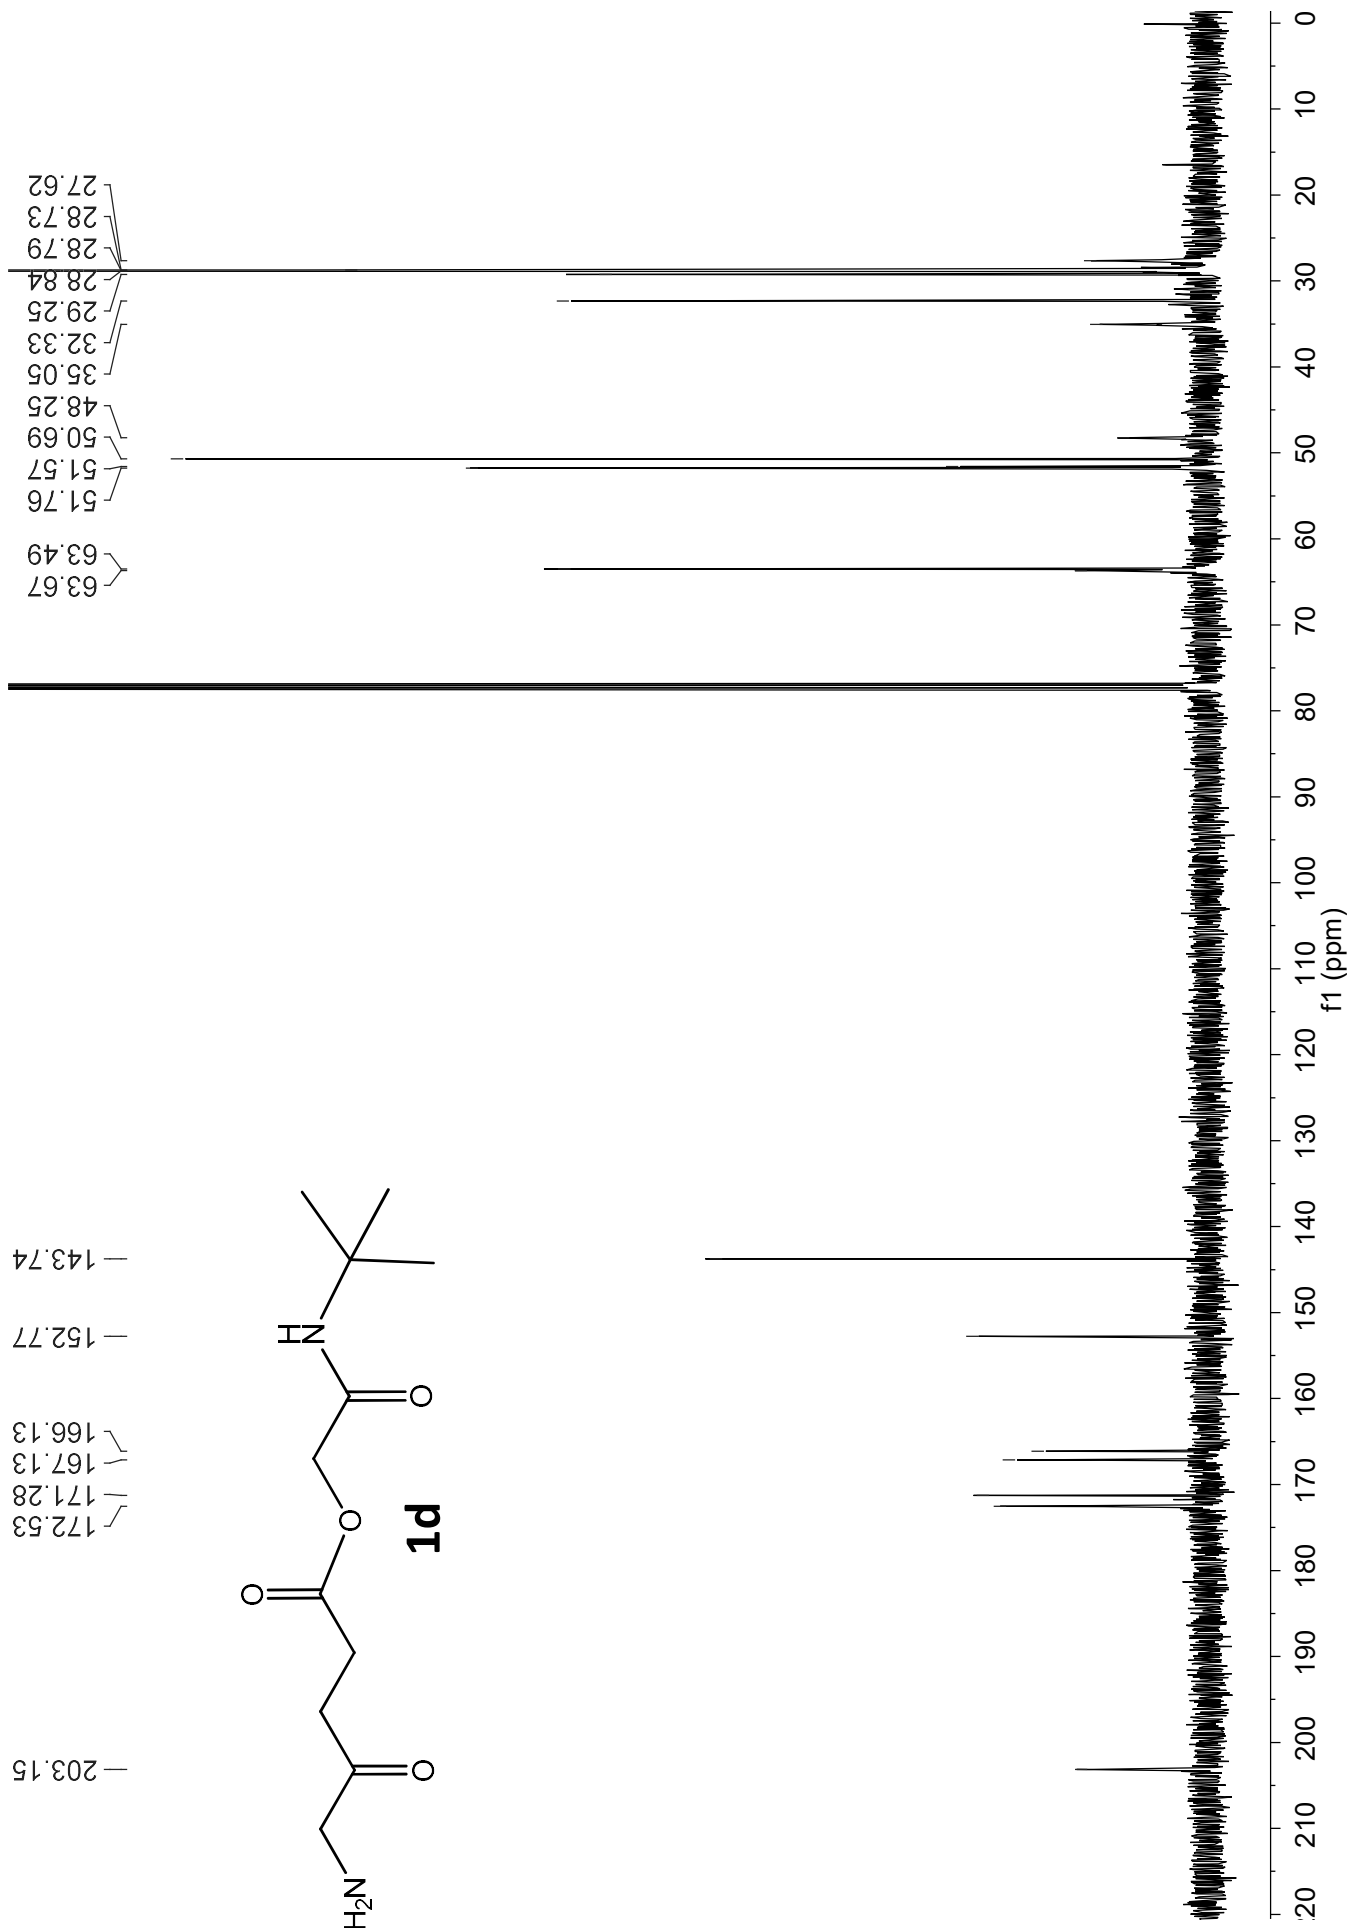



ESI MS/MS spectrum of m/z ([M+H]<sup>+</sup> cation of compound **1d** (collision Energy 15 eV)

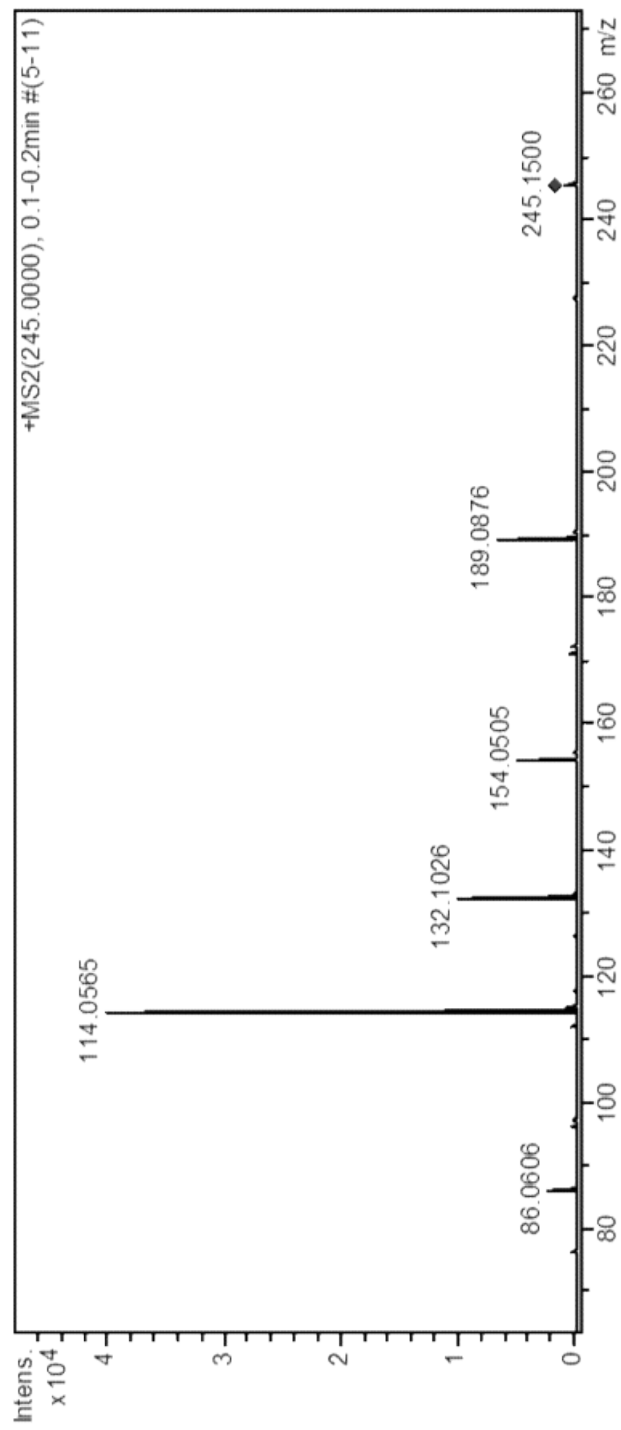

| Meas. m/z | Formula                                                      | m/z           | err [ppm] | rdb | N-Rule | e <sup>-</sup> | Conf                                              |
|-----------|--------------------------------------------------------------|---------------|-----------|-----|--------|----------------|---------------------------------------------------|
| 114.0565  | C <sub>5</sub> H <sub>8</sub> NO <sub>2</sub>                | 114.0550-14.0 | 2.5       | ok  | even   |                | ruptura CO-O←                                     |
| 132.1026  | C <sub>6</sub> H <sub>14</sub> NO <sub>2</sub>               | 132.1019-5.5  | 0.5       | ok  | even   |                | ruptura COO→                                      |
| 154.0505  | C <sub>7</sub> H <sub>8</sub> NO <sub>3</sub>                | 154.0499-4.1  | 4.5       | ok  | even   | X              |                                                   |
| 189.0876  | C <sub>7</sub> H <sub>13</sub> N <sub>2</sub> O <sub>4</sub> | 189.0870-3.4  | 2.5       | ok  | even   |                | [M+H-C <sub>4</sub> H <sub>8</sub> ] <sup>+</sup> |

<sup>1</sup>H-NRM (500 MHz) for compound 2-(cyclohexylamino)-2-oxoethyl-5-aminolevulinate (**1e**)

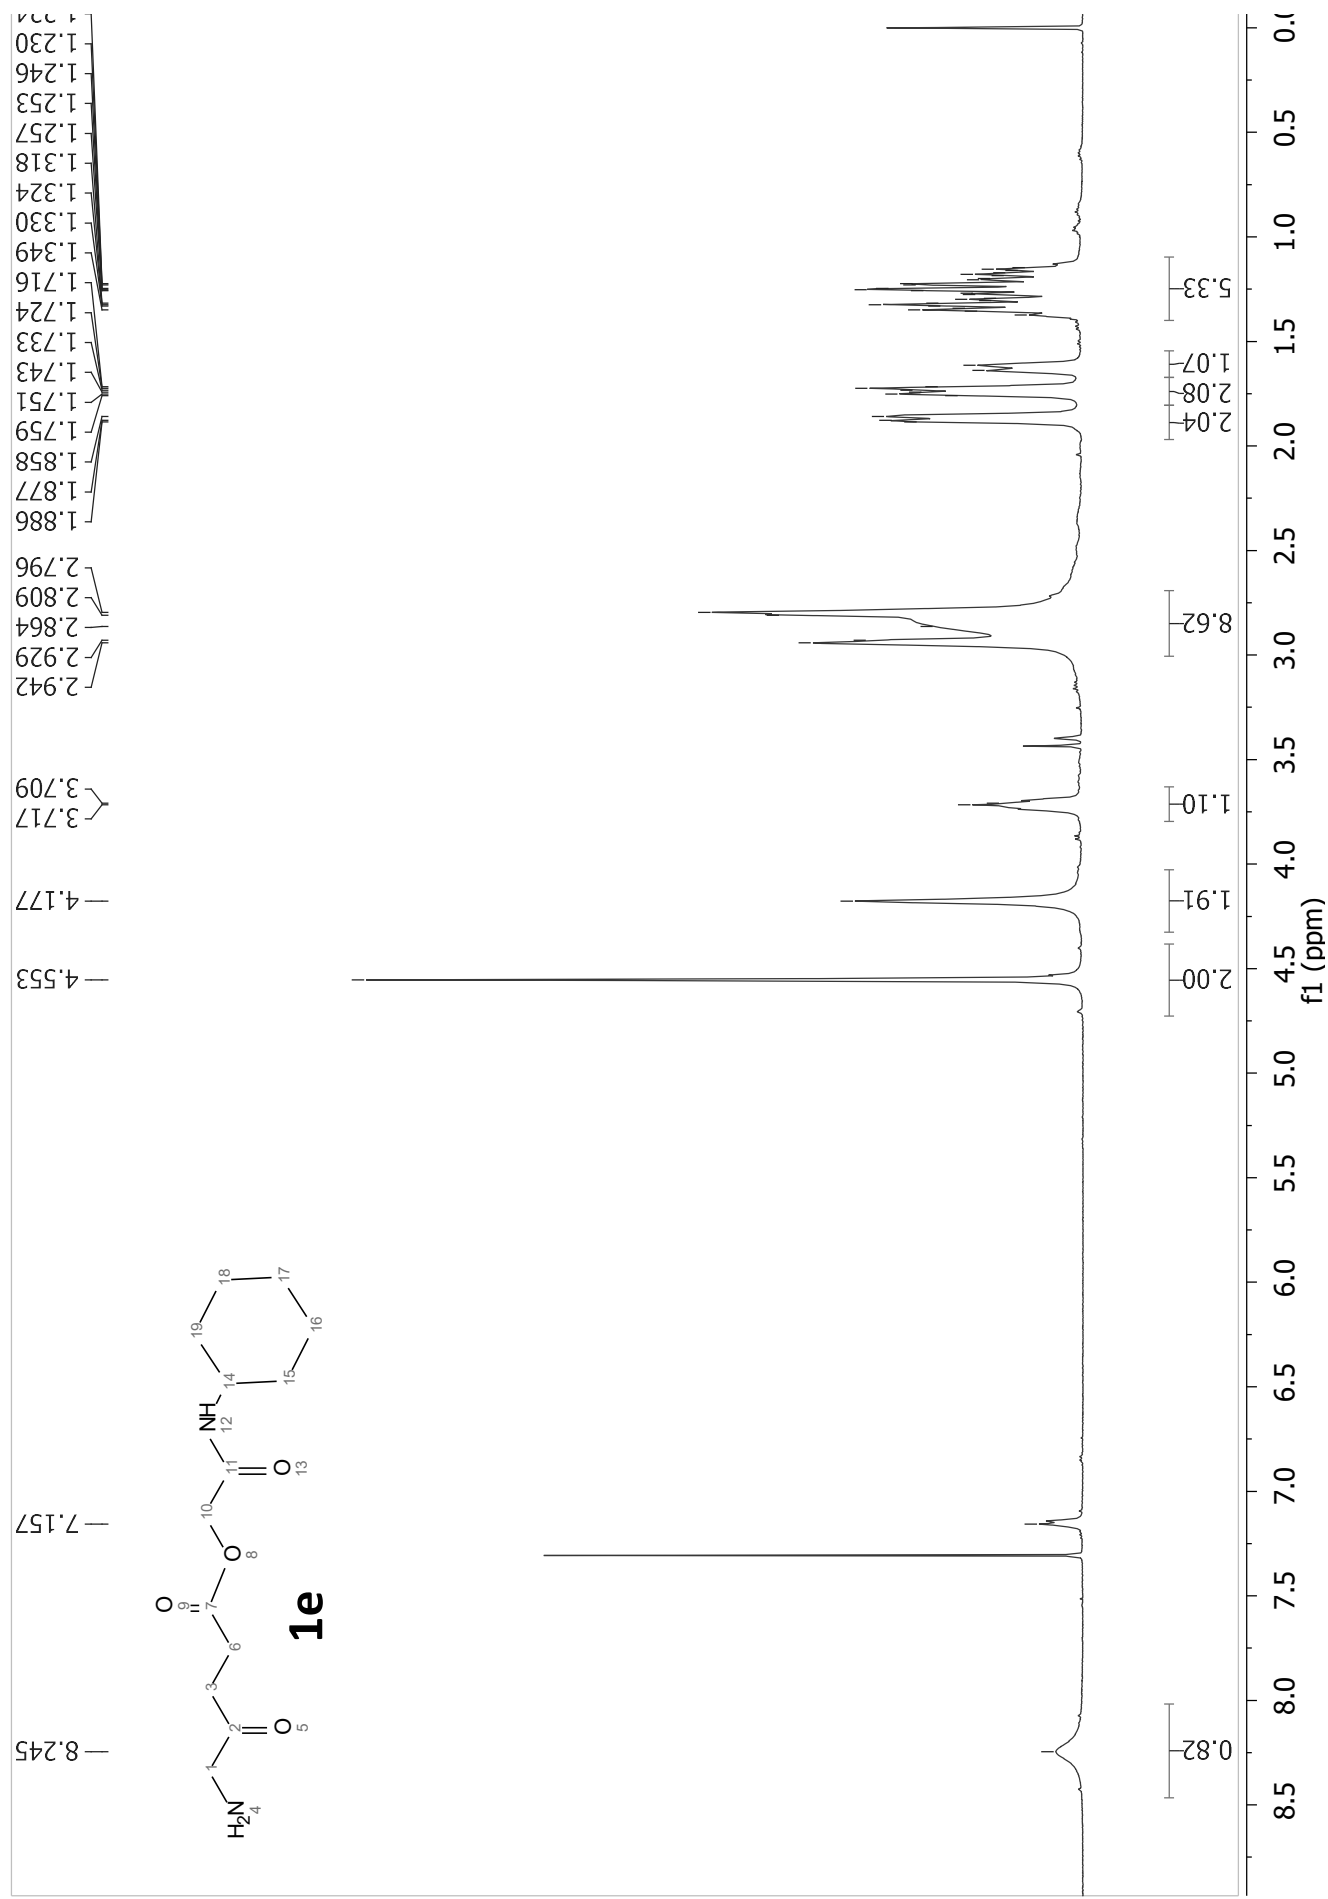

<sup>13</sup>C-NRM (125,7 MHz) for compound **1e**

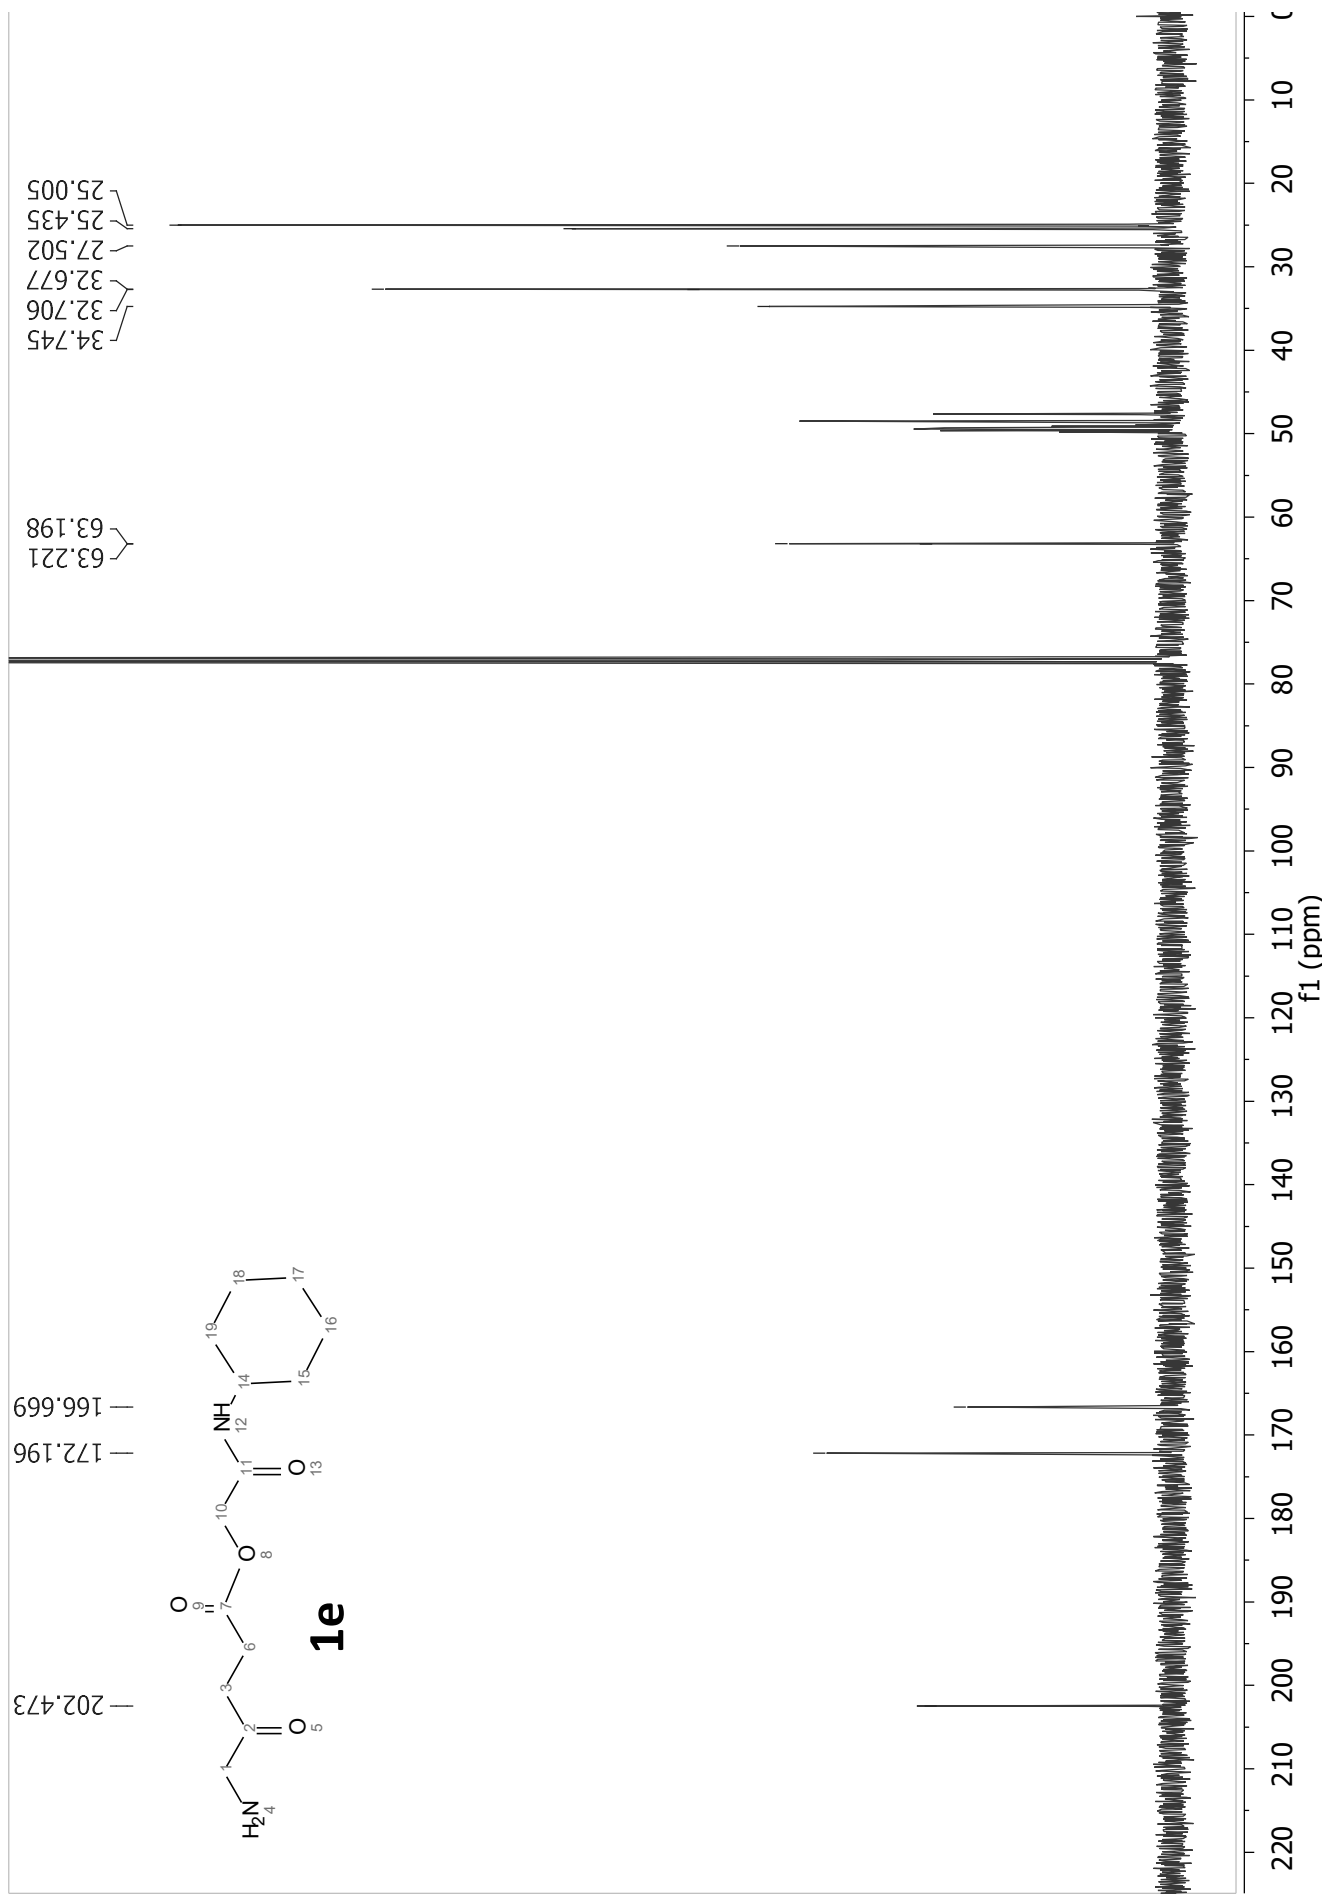

ESI MS/MS spectrum of m/z ([M+H]<sup>+</sup> cation of compound **1e** (collision Energy 15 eV)

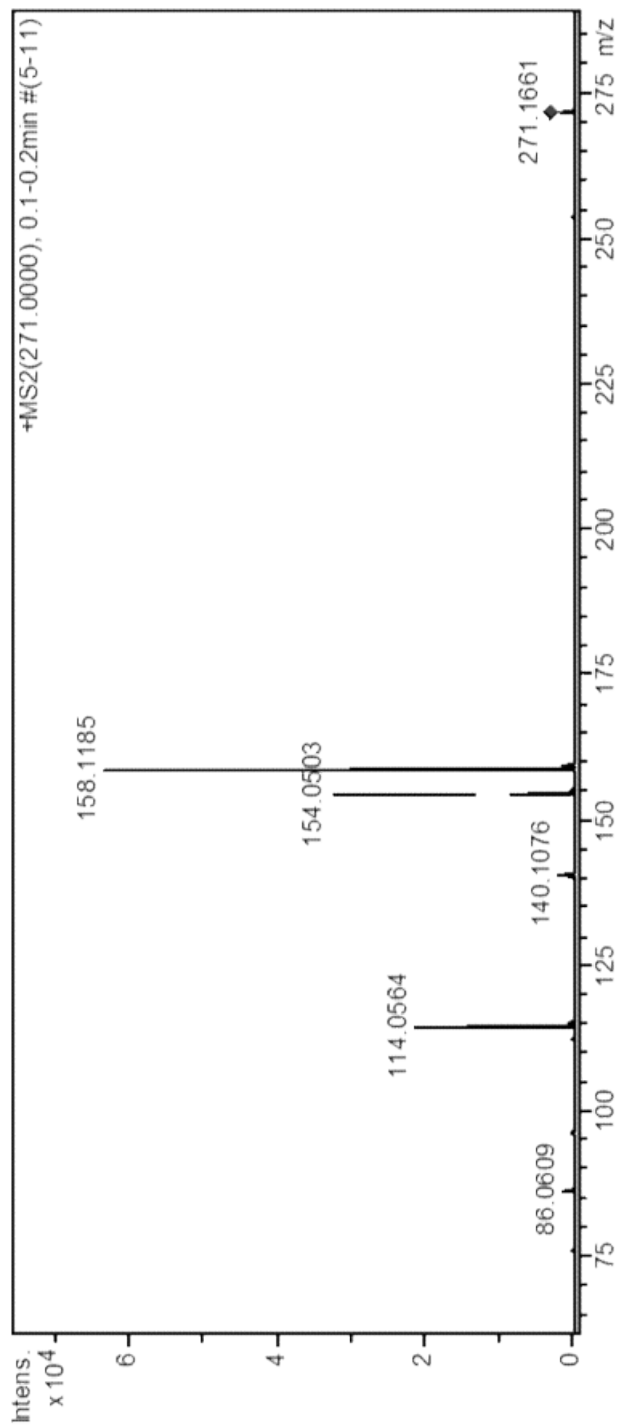

| Meas. m/z | Formula                                         | m/z      | err [ppm] | rdb | N-Rule e <sup>-</sup> Conf |
|-----------|-------------------------------------------------|----------|-----------|-----|----------------------------|
| 114.0564  | C <sub>5</sub> H <sub>8</sub> N <sub>2</sub> O  | 114.0550 | -12.5     | 2.5 | ok even ruptura CO-O←      |
| 154.0503  | C <sub>7</sub> H <sub>8</sub> N <sub>2</sub> O  | 154.0499 | -2.7      | 4.5 | ok even X                  |
| 158.1185  | C <sub>8</sub> H <sub>16</sub> N <sub>2</sub> O | 158.1176 | -6.2      | 1.5 | ok even ruptura CO-O→      |

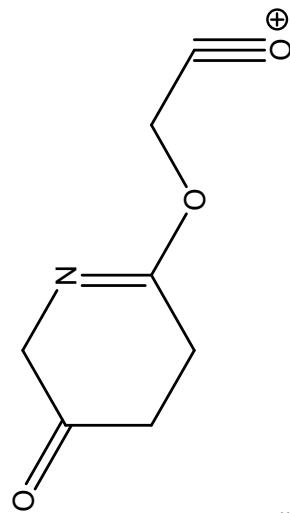

X=

<sup>1</sup>H-NRM (500 MHz) for compound 2-((4-fluorophenyl)amino)-2-oxoethyl-5-aminovalerate (**1f**)

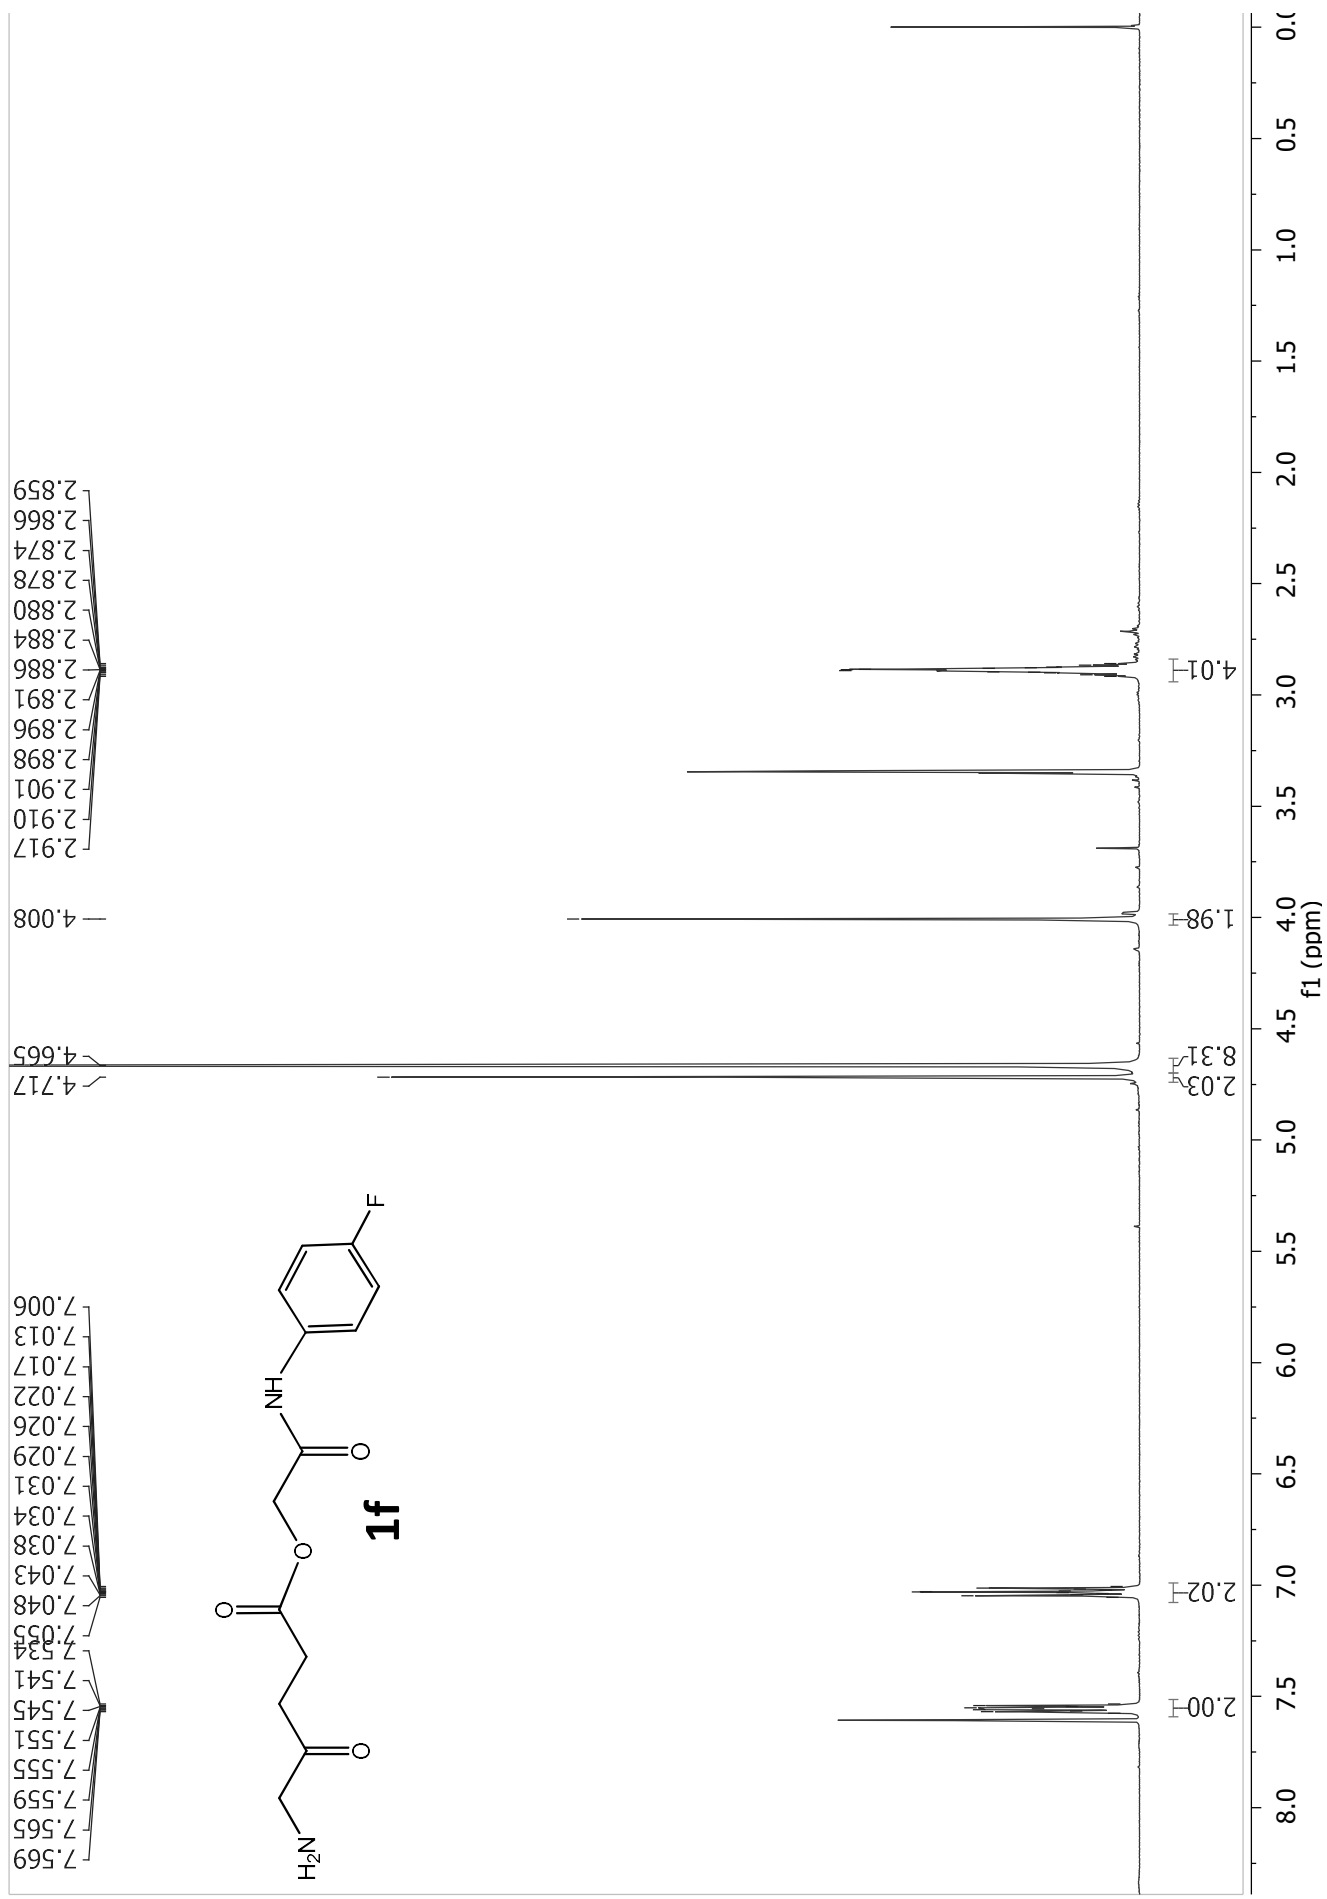

<sup>13</sup>C-NRM (125,7 MHz) for compound **1f**

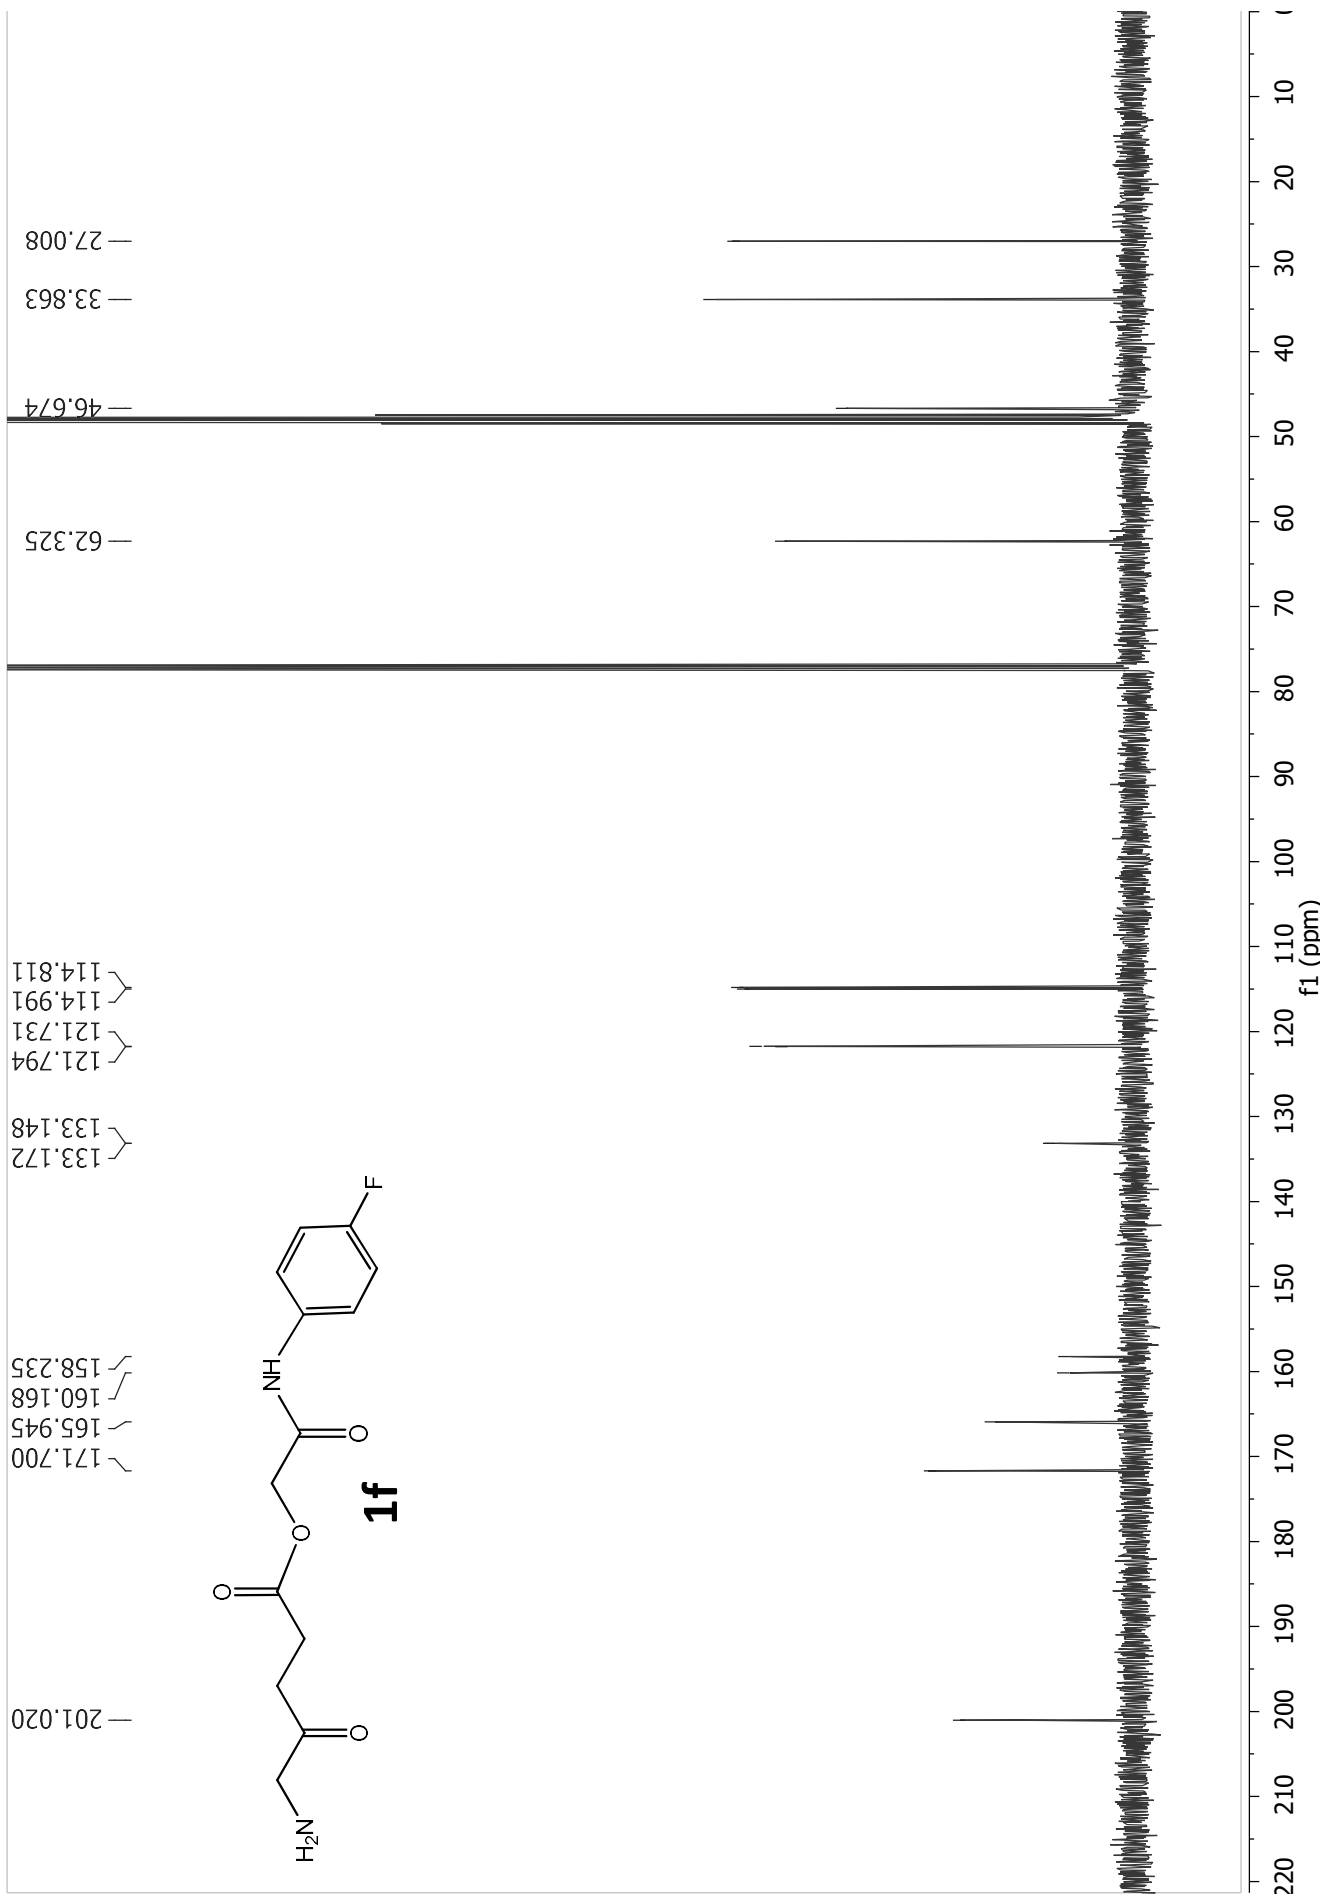

ESI MS/MS spectrum of m/z ([M+H]<sup>+</sup> cation of compound **1f** (collision Energy 10 eV)

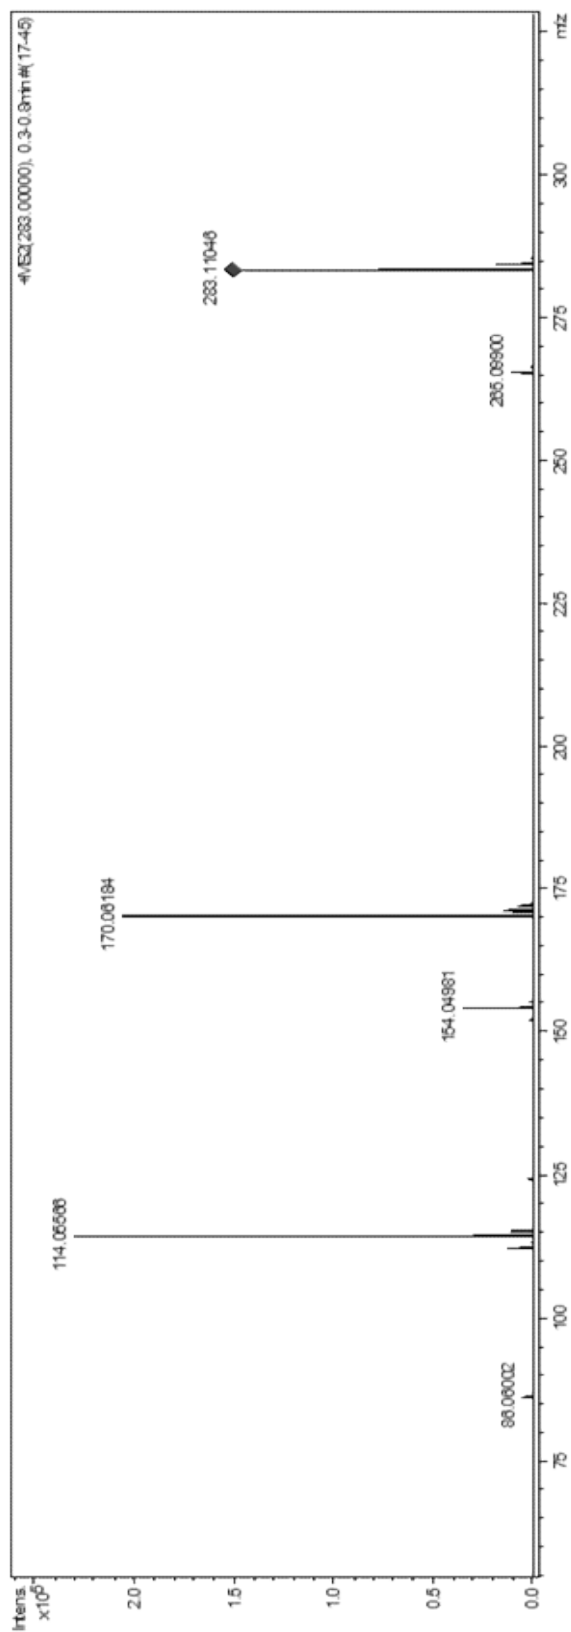

| Meas. m/z | Formula                                                         | m/z       | err [ppm] | e <sup>-</sup> Conf | N-Rule | mSigma |
|-----------|-----------------------------------------------------------------|-----------|-----------|---------------------|--------|--------|
| 86.06002  | C <sub>4</sub> H <sub>8</sub> N <sub>2</sub> O                  | 86.06004  | 0.3       | even                | ok     | 5.2    |
| 114.05566 | C <sub>5</sub> H <sub>8</sub> N <sub>2</sub> O                  | 114.05495 | -6.2      | even                | ok     | 0.7    |
| 154.04981 | C <sub>7</sub> H <sub>8</sub> N <sub>2</sub> O                  | 154.04987 | 0.4       | even                | ok     | 2.4    |
| 170.06184 | C <sub>8</sub> H <sub>9</sub> F <sub>2</sub> N <sub>2</sub> O   | 170.06118 | -3.9      | even                | ok     | 22.5   |
| 265.09900 | C <sub>13</sub> H <sub>14</sub> F <sub>2</sub> N <sub>2</sub> O | 265.09830 | -2.7      | even                | ok     | 10.9   |

<sup>1</sup>H-NRM (500 MHz) for compound 2-(4-tolylamino)-2-oxoethyl-5-aminolevulinate (**1g**)

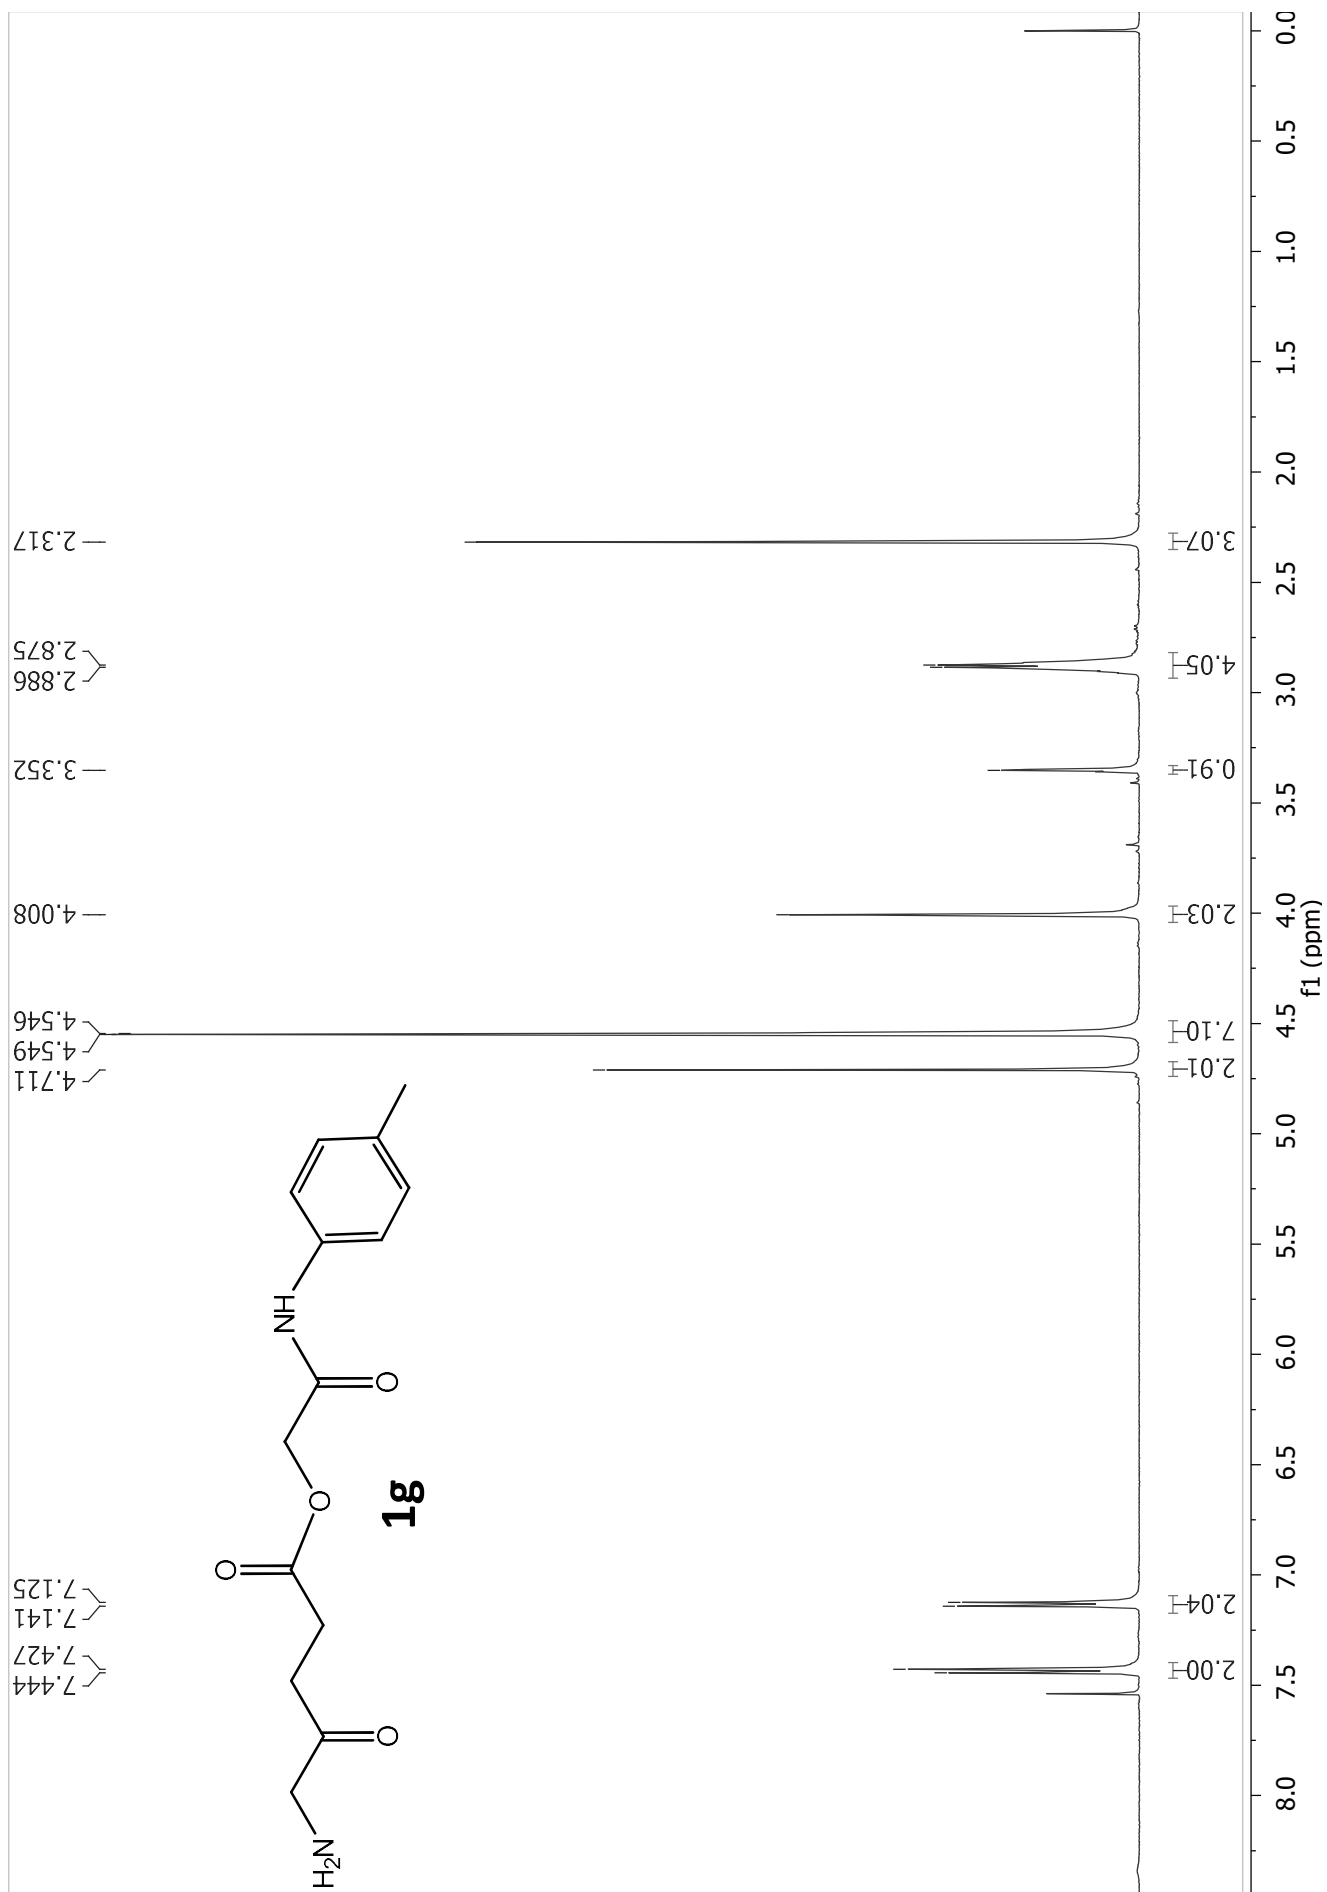



<sup>13</sup>C-NRM (125,7 MHz) for compound **1g**

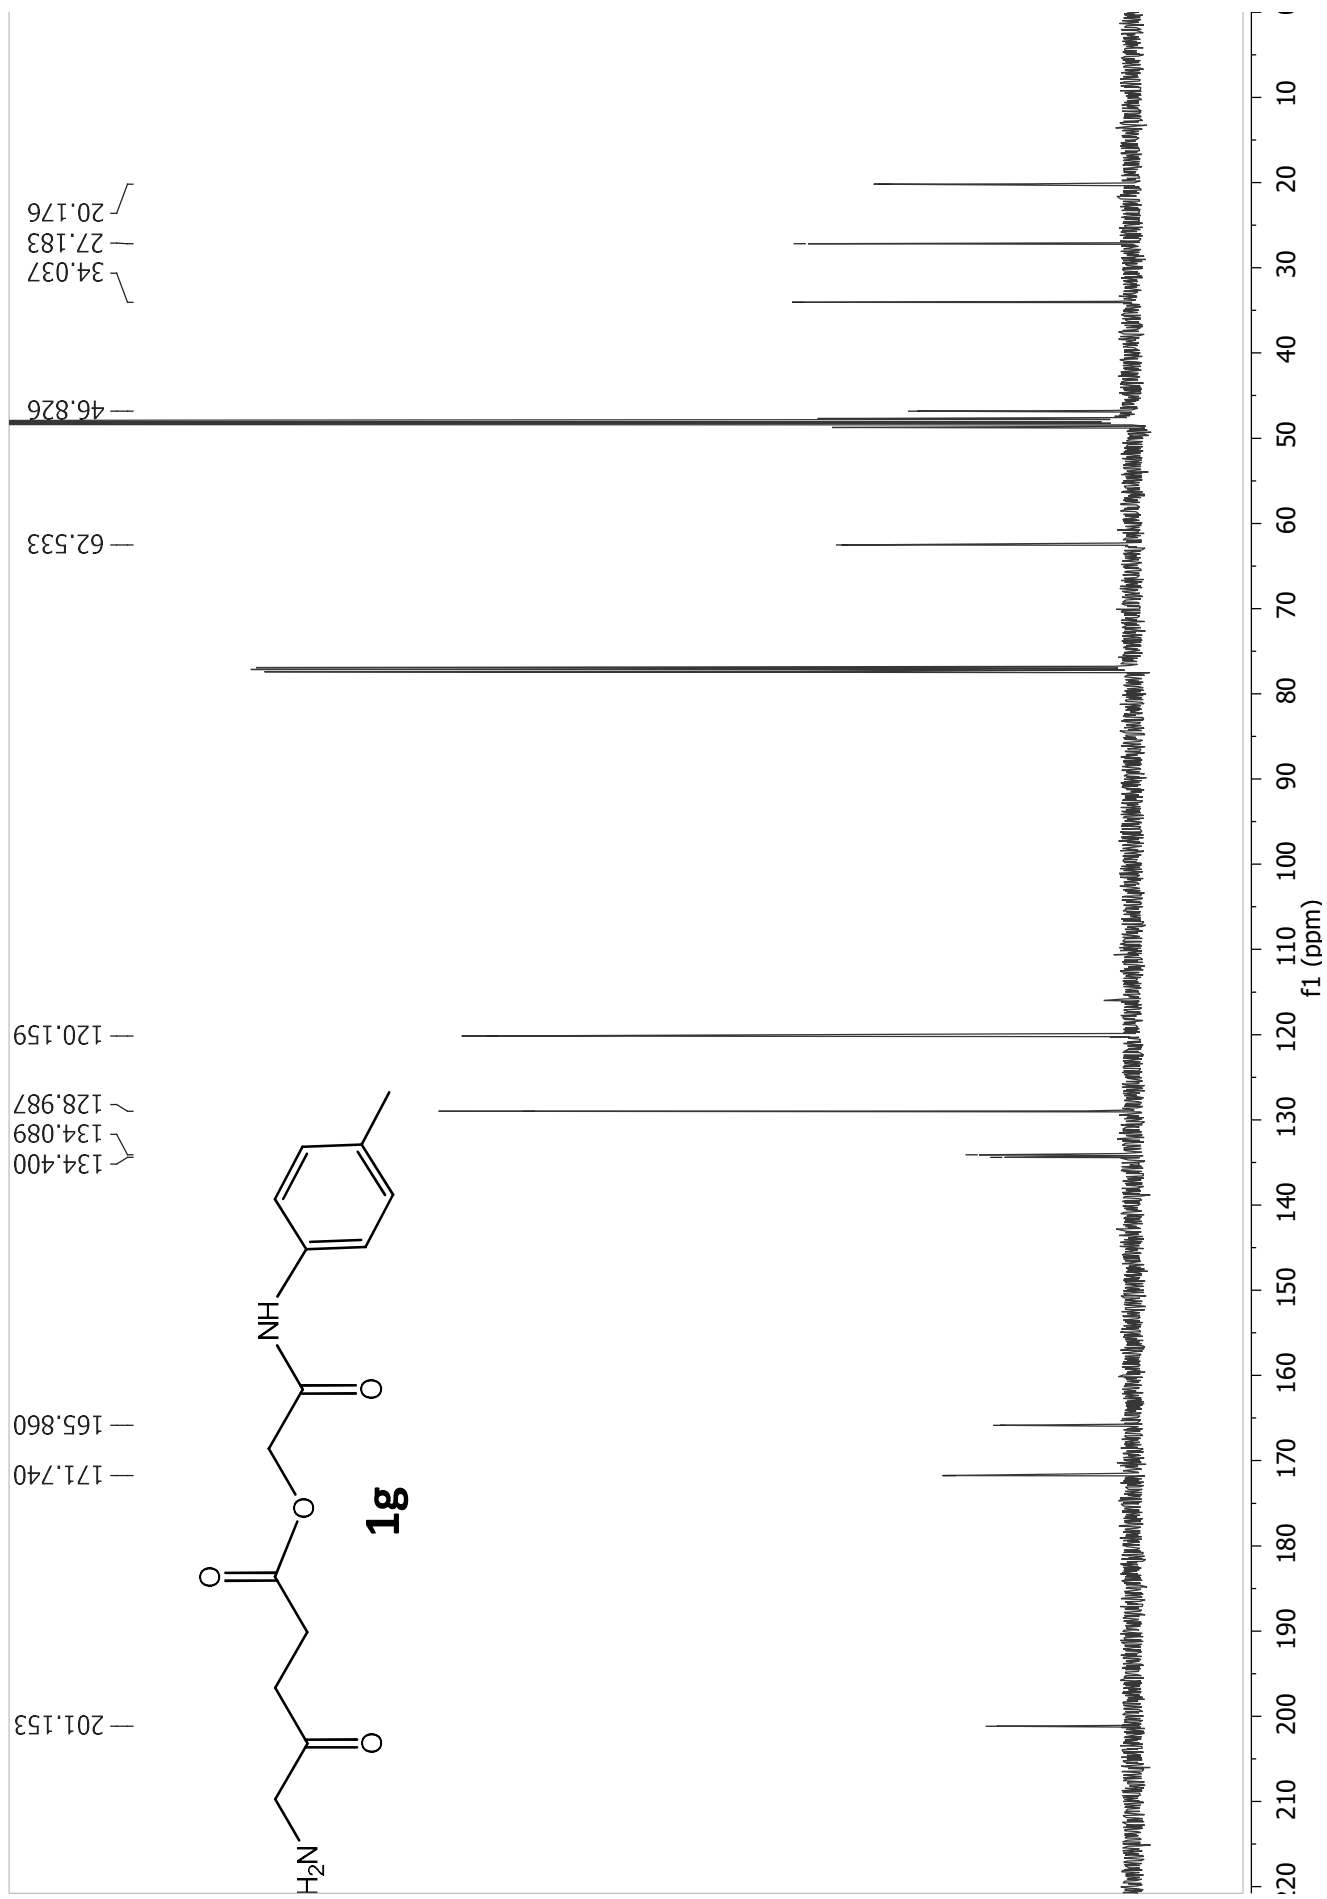

# COSY (500 MHz) for compound **1g**

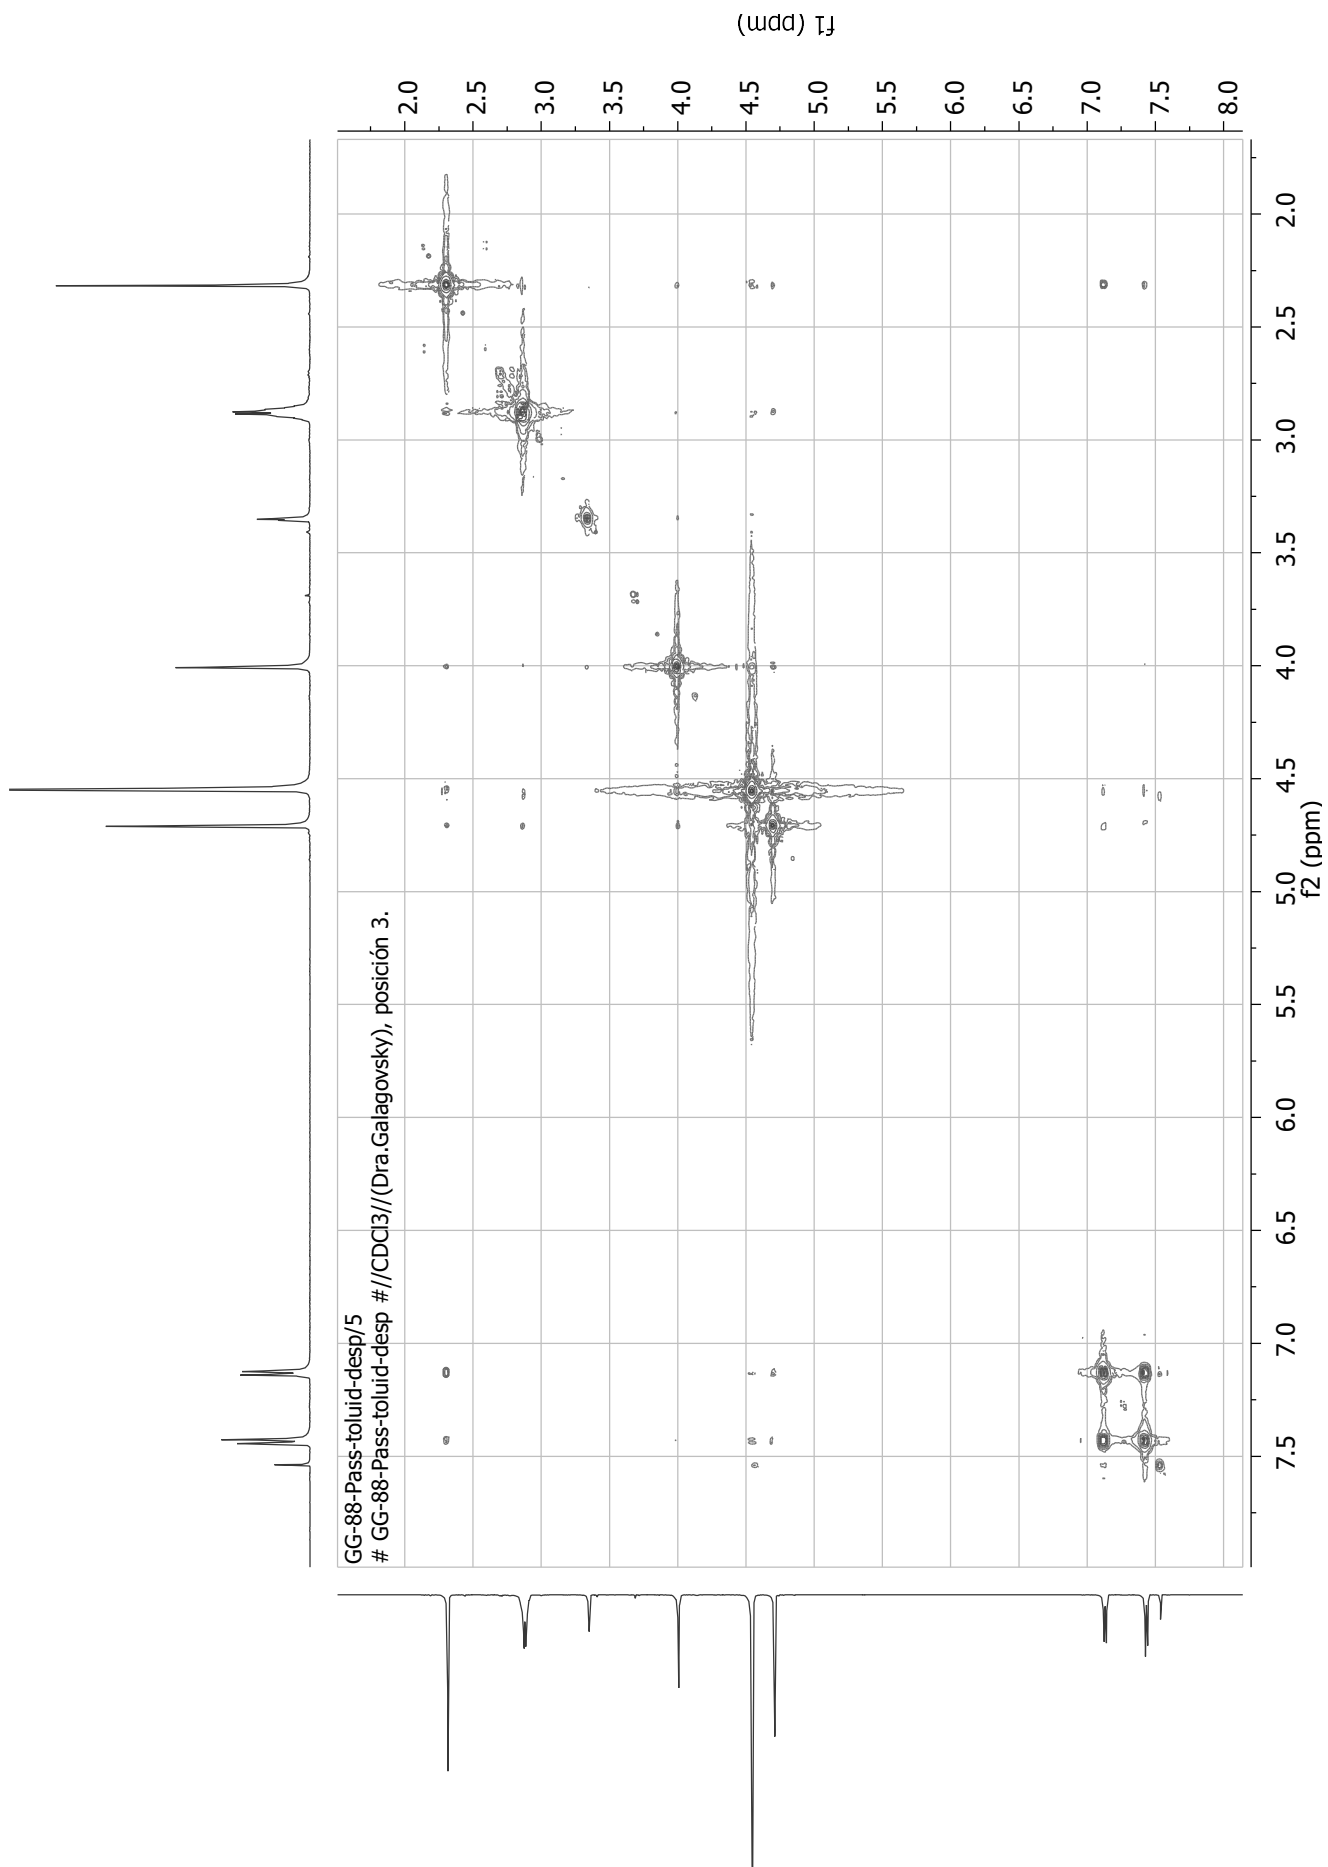

# HSQC-DEPT (500 MHz) for compound **1g**

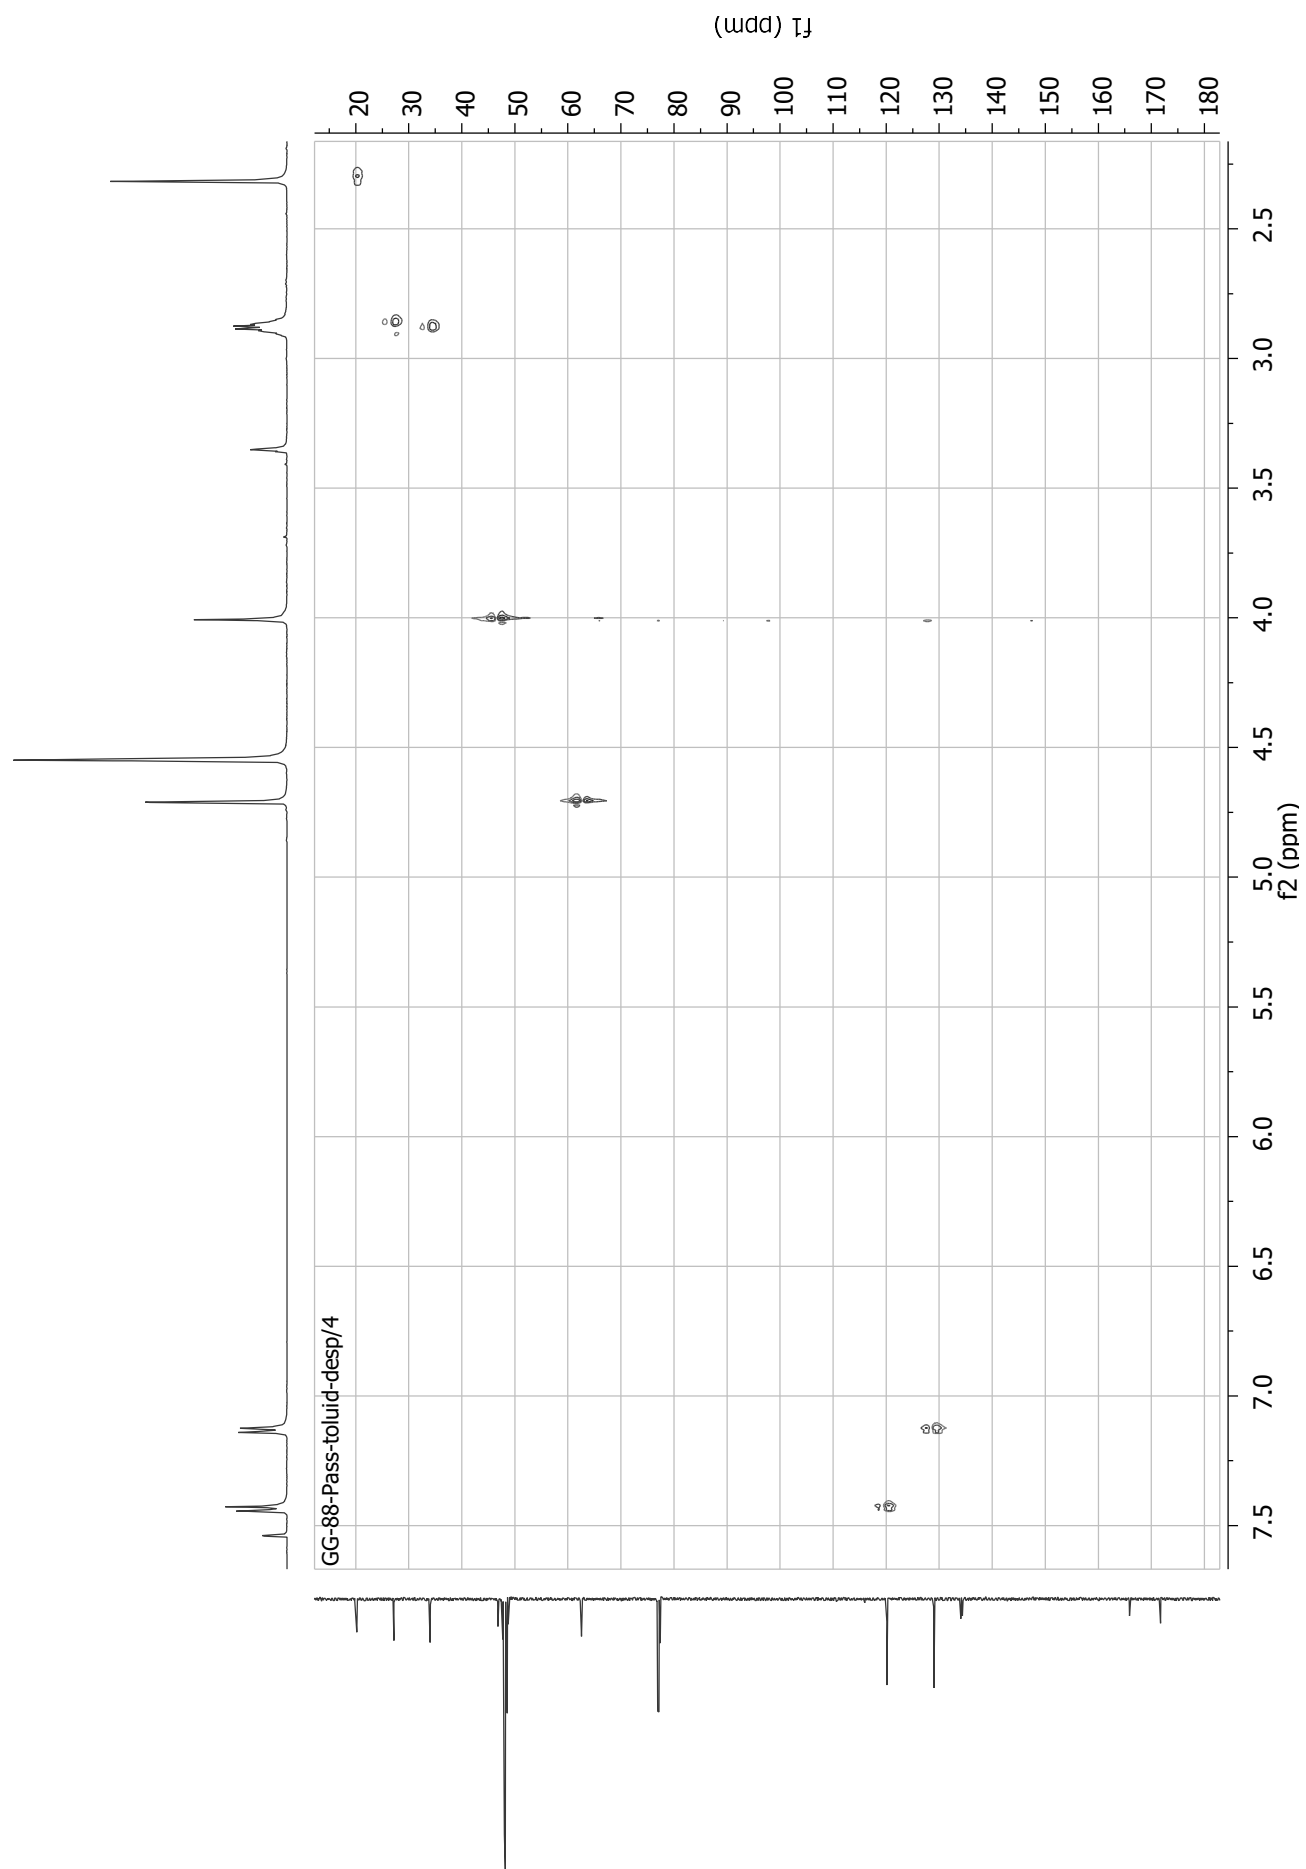

ESI MS/MS spectrum of m/z ([M+H]<sup>+</sup> cation of compound **1g** (collision Energy 10 eV)

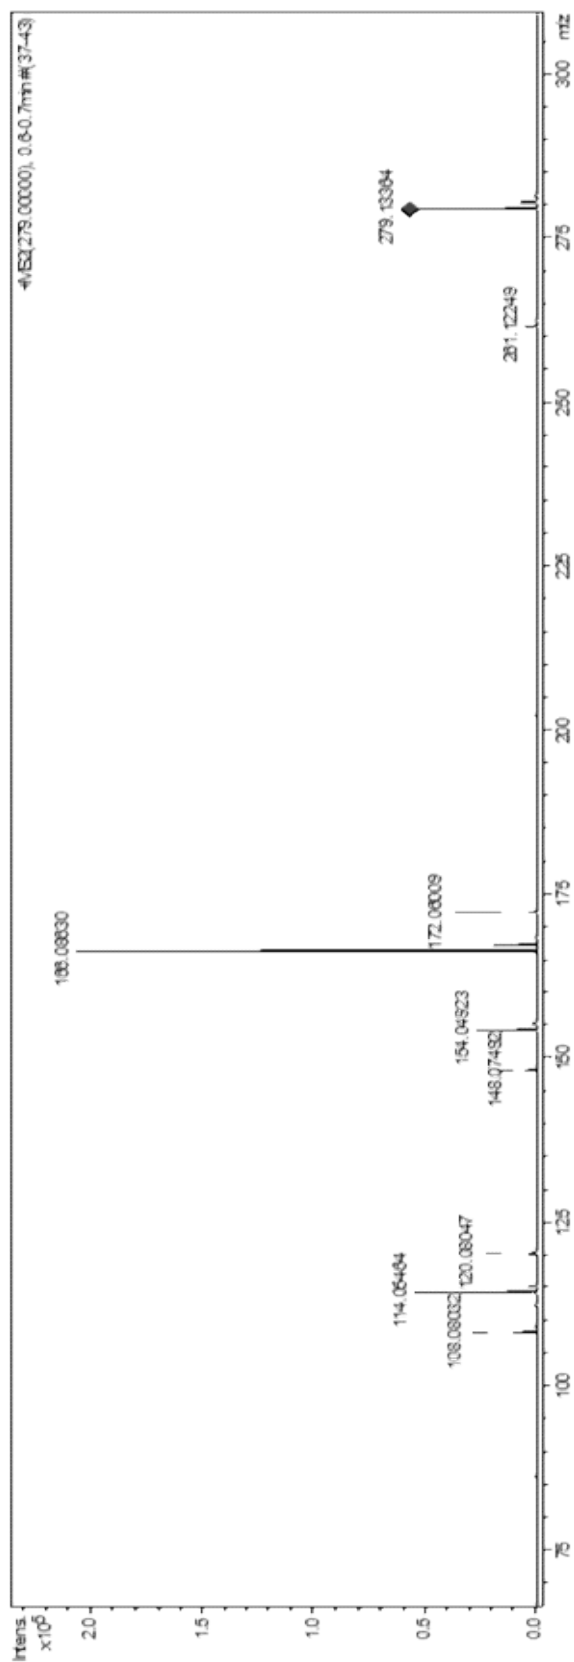

| cas. m/z  | Formula           | m/z       | err [ppm] | e <sup>-</sup> Conf | N-Rule | mSigma  |
|-----------|-------------------|-----------|-----------|---------------------|--------|---------|
| 8.08032   | C 7 H 10 N        | 108.08078 | 4.2       | even ok             | 5.0    |         |
| 4.05464   | C 5 H 8 N O 2     | 114.05495 | 2.7       | even ok             | 1.7    |         |
| 0.08047   | C 8 H 10 N        | 120.08078 | 2.6       | even ok             | 11.3   |         |
| 8.07492   | C 9 H 10 N O      | 148.07569 | 5.2       | even ok             | 11.4   | 166-H2O |
| 4.04923   | C 7 H 8 N O 3     | 154.04987 | 4.2       | even ok             | 3.3    |         |
| 6.08630   | C 9 H 12 N O 2    | 166.08626 | -0.3      | even ok             | 3.4    |         |
| 1.12249   | C 14 H 17 N 2 O 3 | 261.12337 | 261.12337 | 3.3 even ok         | ok     | 21.4    |
| 279.13364 | C 14 H 19 N 2 O 4 | 279.13393 | 279.13393 | 1.0 even ok         | ok     | 5.6     |

<sup>1</sup>H-NRM (500 MHz) for compound 2-((2-(trifluoromethyl)phenyl)amino)-2-oxoethyl-5-aminolevulinate (**1h**)

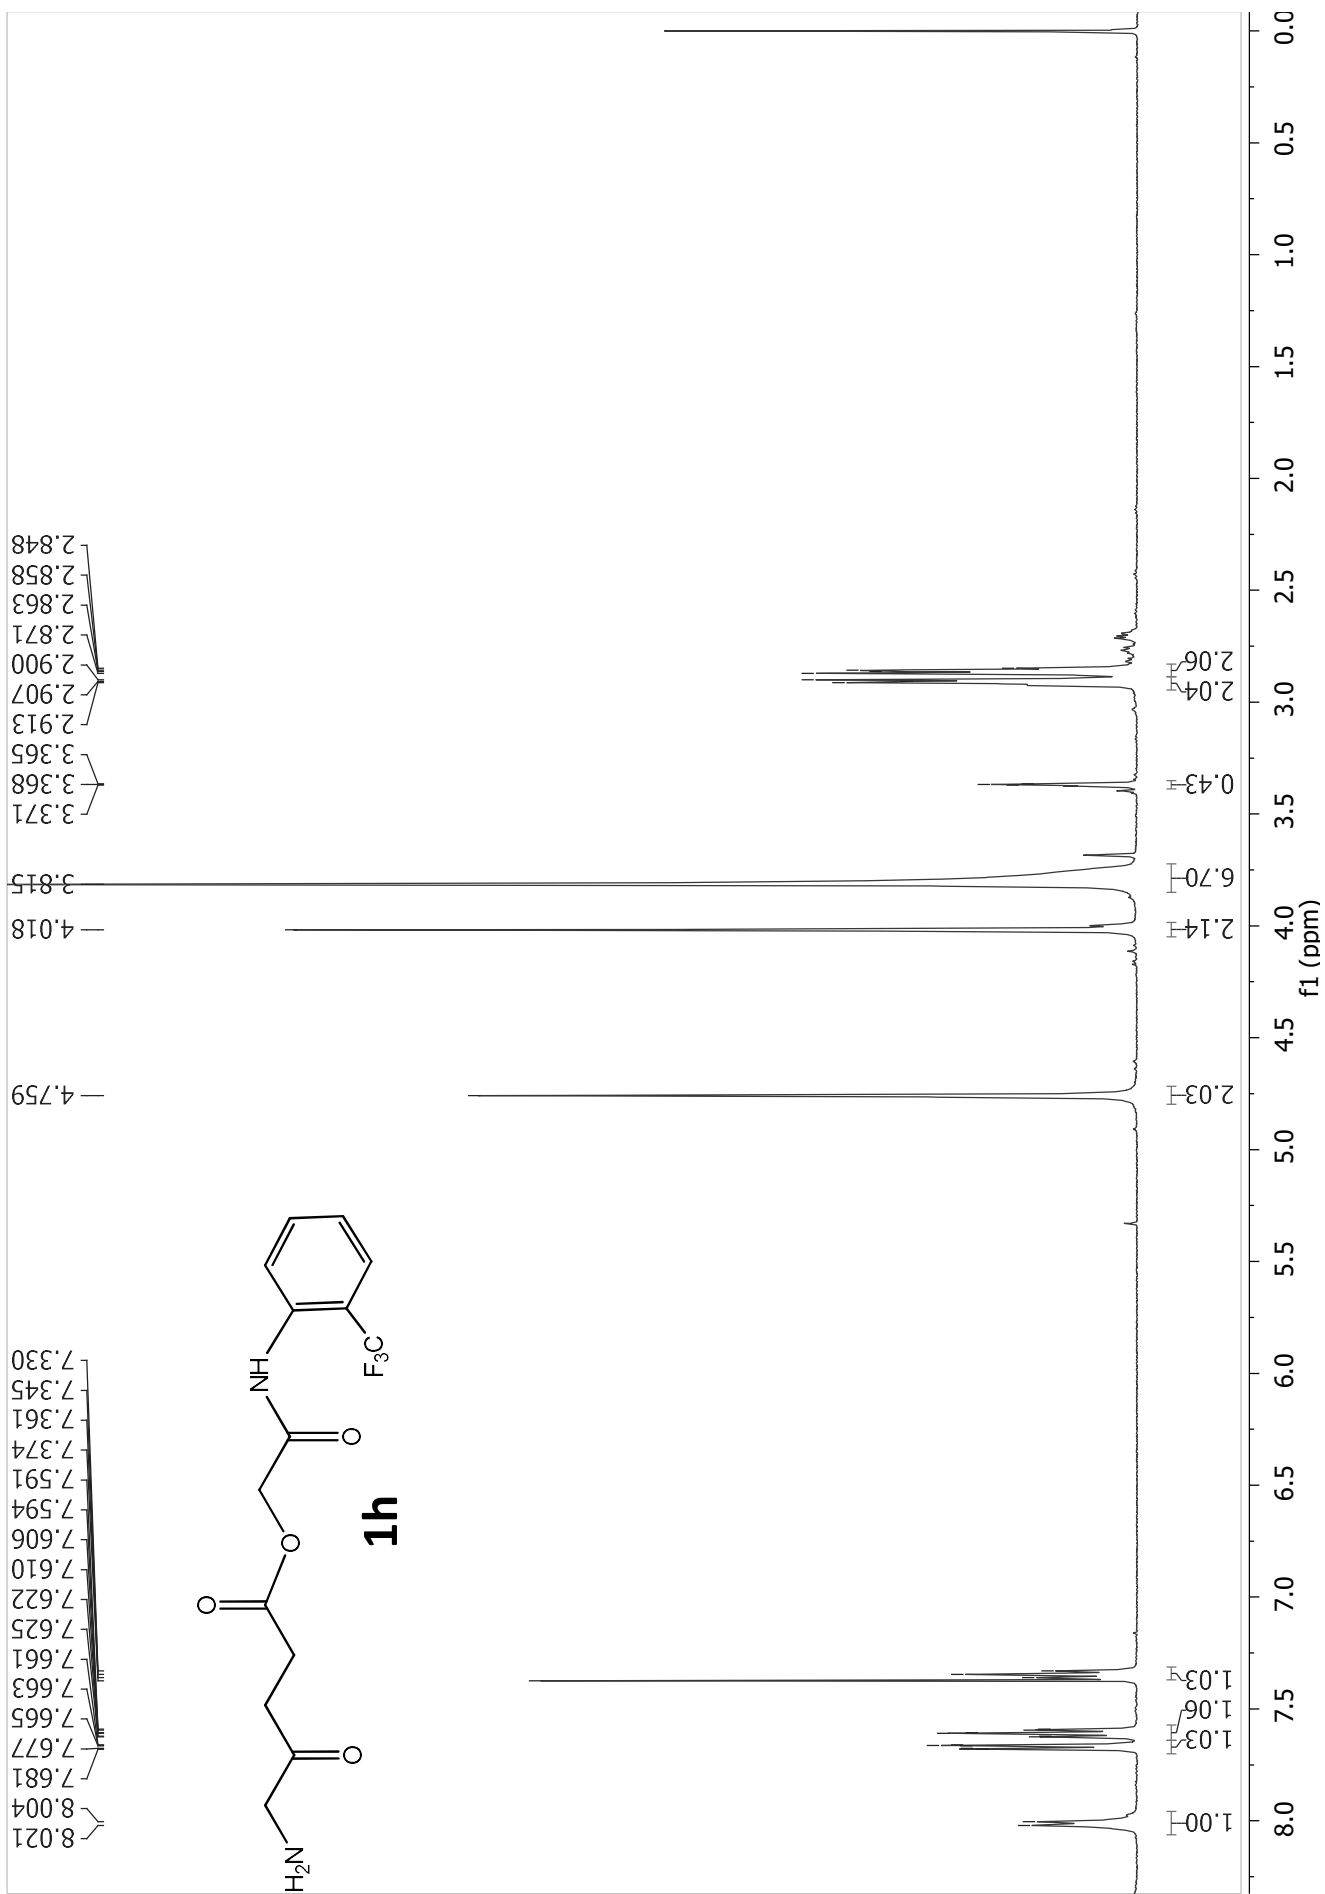

<sup>13</sup>C-NRM (125,7 MHz) for compound **1h**

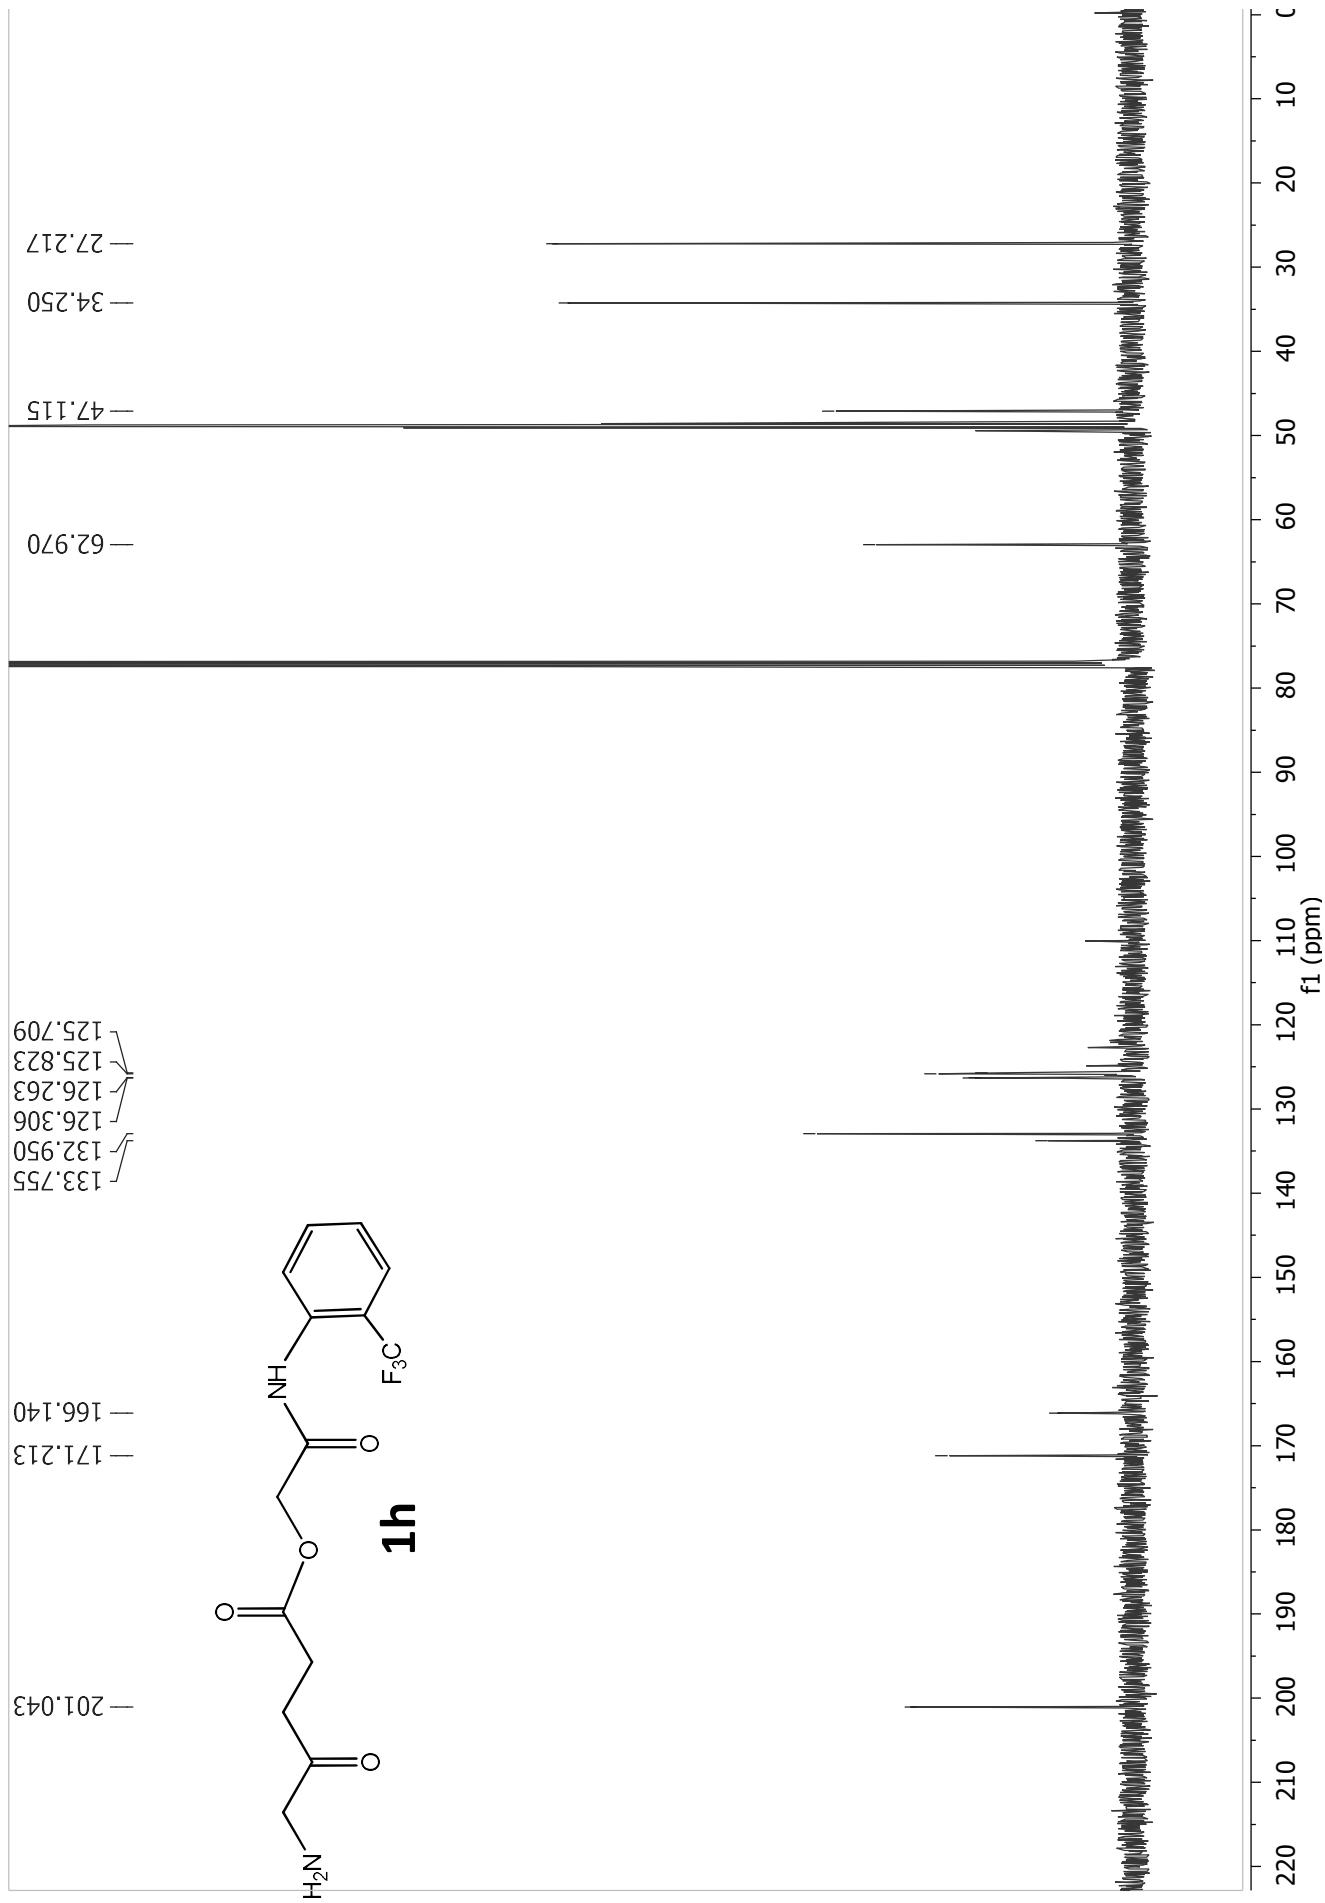

ESI MS/MS spectrum of m/z ([M+H]<sup>+</sup> cation of compound **1h** (collision Energy 10 eV)

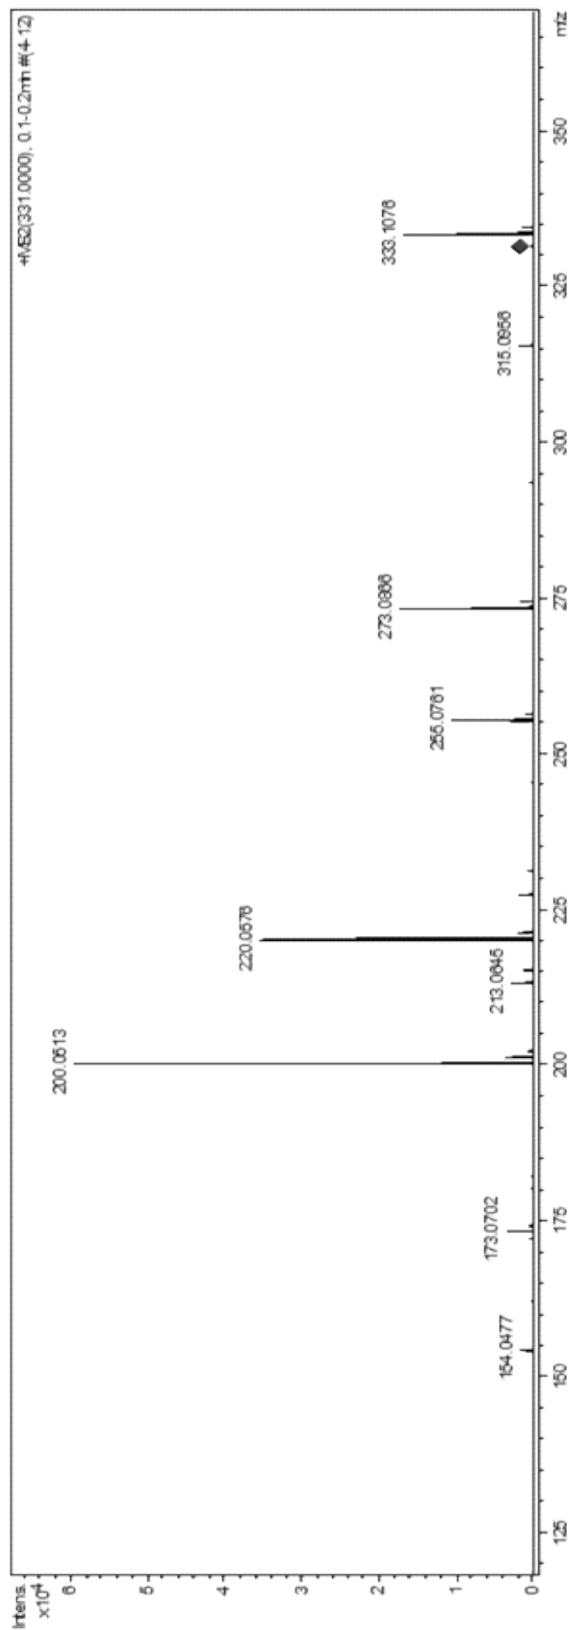

| Meas. m/z | Formula                                                                      | m/z      | err [ppm] | rdb  | e <sup>-</sup> Conf | N-Rule                  |
|-----------|------------------------------------------------------------------------------|----------|-----------|------|---------------------|-------------------------|
| 200.0513  | C <sub>9</sub> H <sub>8</sub> F <sub>2</sub> N <sub>2</sub> O <sub>2</sub>   | 200.0518 | 200.0518  | 2.3  | 5.5 even            | ok 220-HF               |
| 220.0576  | C <sub>9</sub> H <sub>9</sub> F <sub>3</sub> N <sub>2</sub> O <sub>2</sub>   | 220.0580 | 220.0580  | 2.0  | 4.5 even            | ok                      |
| 255.0761  | C <sub>11</sub> H <sub>12</sub> F <sub>2</sub> N <sub>2</sub> O <sub>4</sub> | 255.0776 | 255.0776  | 5.7  | 6.5 even            | ok                      |
|           | C <sub>12</sub> H <sub>10</sub> F <sub>3</sub> N <sub>2</sub> O              | 255.0740 | 255.0740  | -8.3 | 7.5 even            | ok                      |
|           | C <sub>14</sub> H <sub>11</sub> N <sub>2</sub> O <sub>3</sub>                | 255.0764 | 255.0764  | 1.3  | 10.5 even           | ok                      |
| 273.0866  | C <sub>12</sub> H <sub>12</sub> F <sub>3</sub> N <sub>2</sub> O <sub>2</sub> | 273.0845 | 273.0845  | 1.3  | -7.7 6.5 even       | ok 273-H <sub>2</sub> O |
|           | C <sub>14</sub> H <sub>13</sub> N <sub>2</sub> O <sub>4</sub>                | 273.0870 | 273.0870  | 1.3  | 9.5 even            | ok -3FH?                |
| 315.0956  | C <sub>14</sub> H <sub>14</sub> F <sub>3</sub> N <sub>2</sub> O <sub>3</sub> | 315.0951 | 315.0951  |      | -1.7 7.5 even       | ok                      |
| 333.1076  | C <sub>14</sub> H <sub>16</sub> F <sub>3</sub> N <sub>2</sub> O <sub>4</sub> | 333.1057 | 333.1057  |      | -5.8 6.5 even       | ok                      |

<sup>1</sup>H-NRM (500 MHz) for compound 2-((4-bromo-2-methylphenyl)amino)-2-oxoethyl-5-aminolevulinate (**1i**)

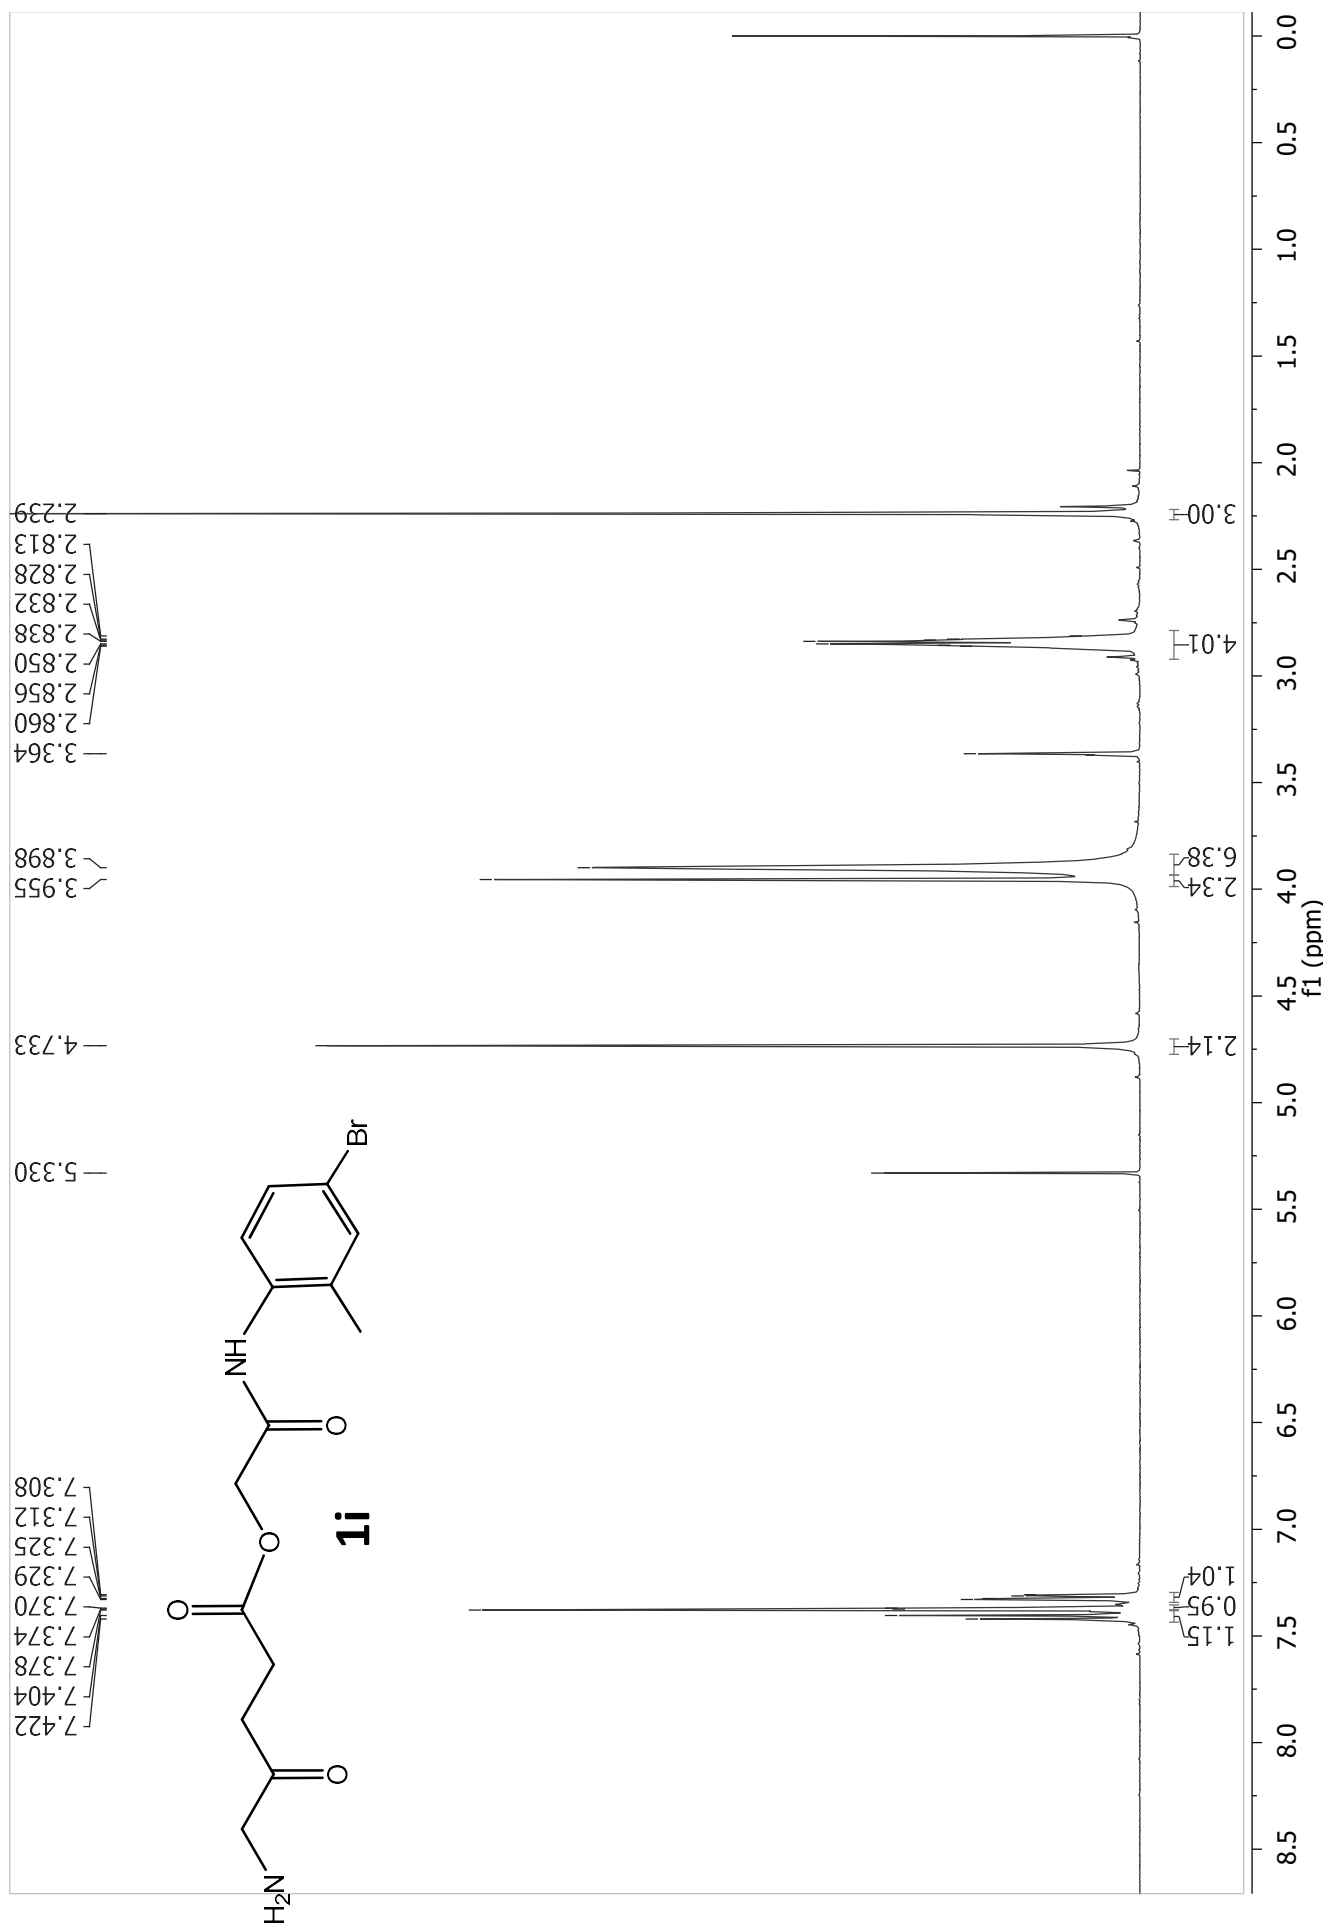



<sup>13</sup>C-NRM (125,7 MHz) for compound **1i**

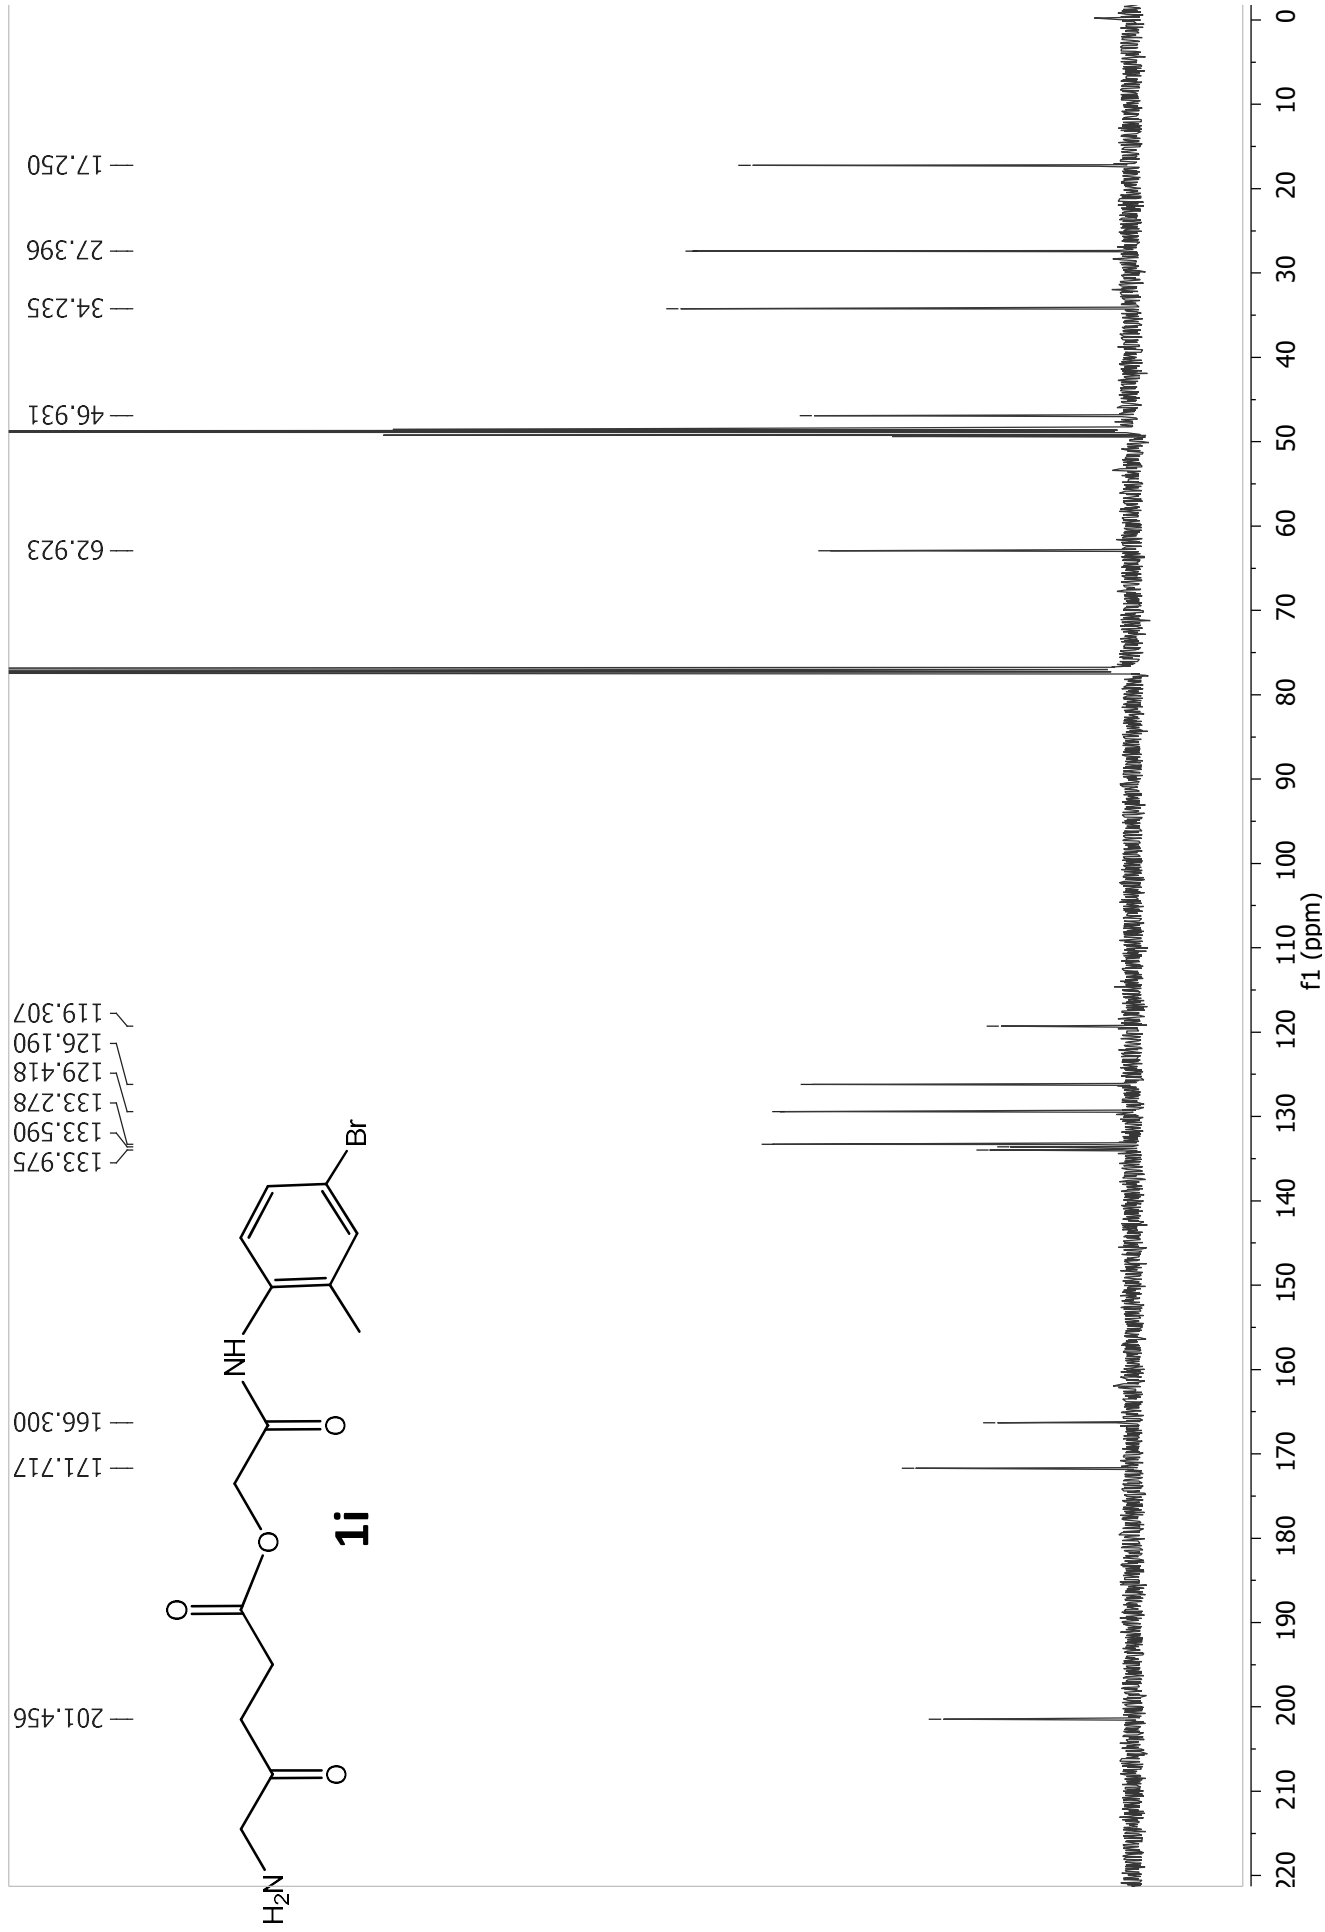

COSY (500 MHz) for compound **1i**

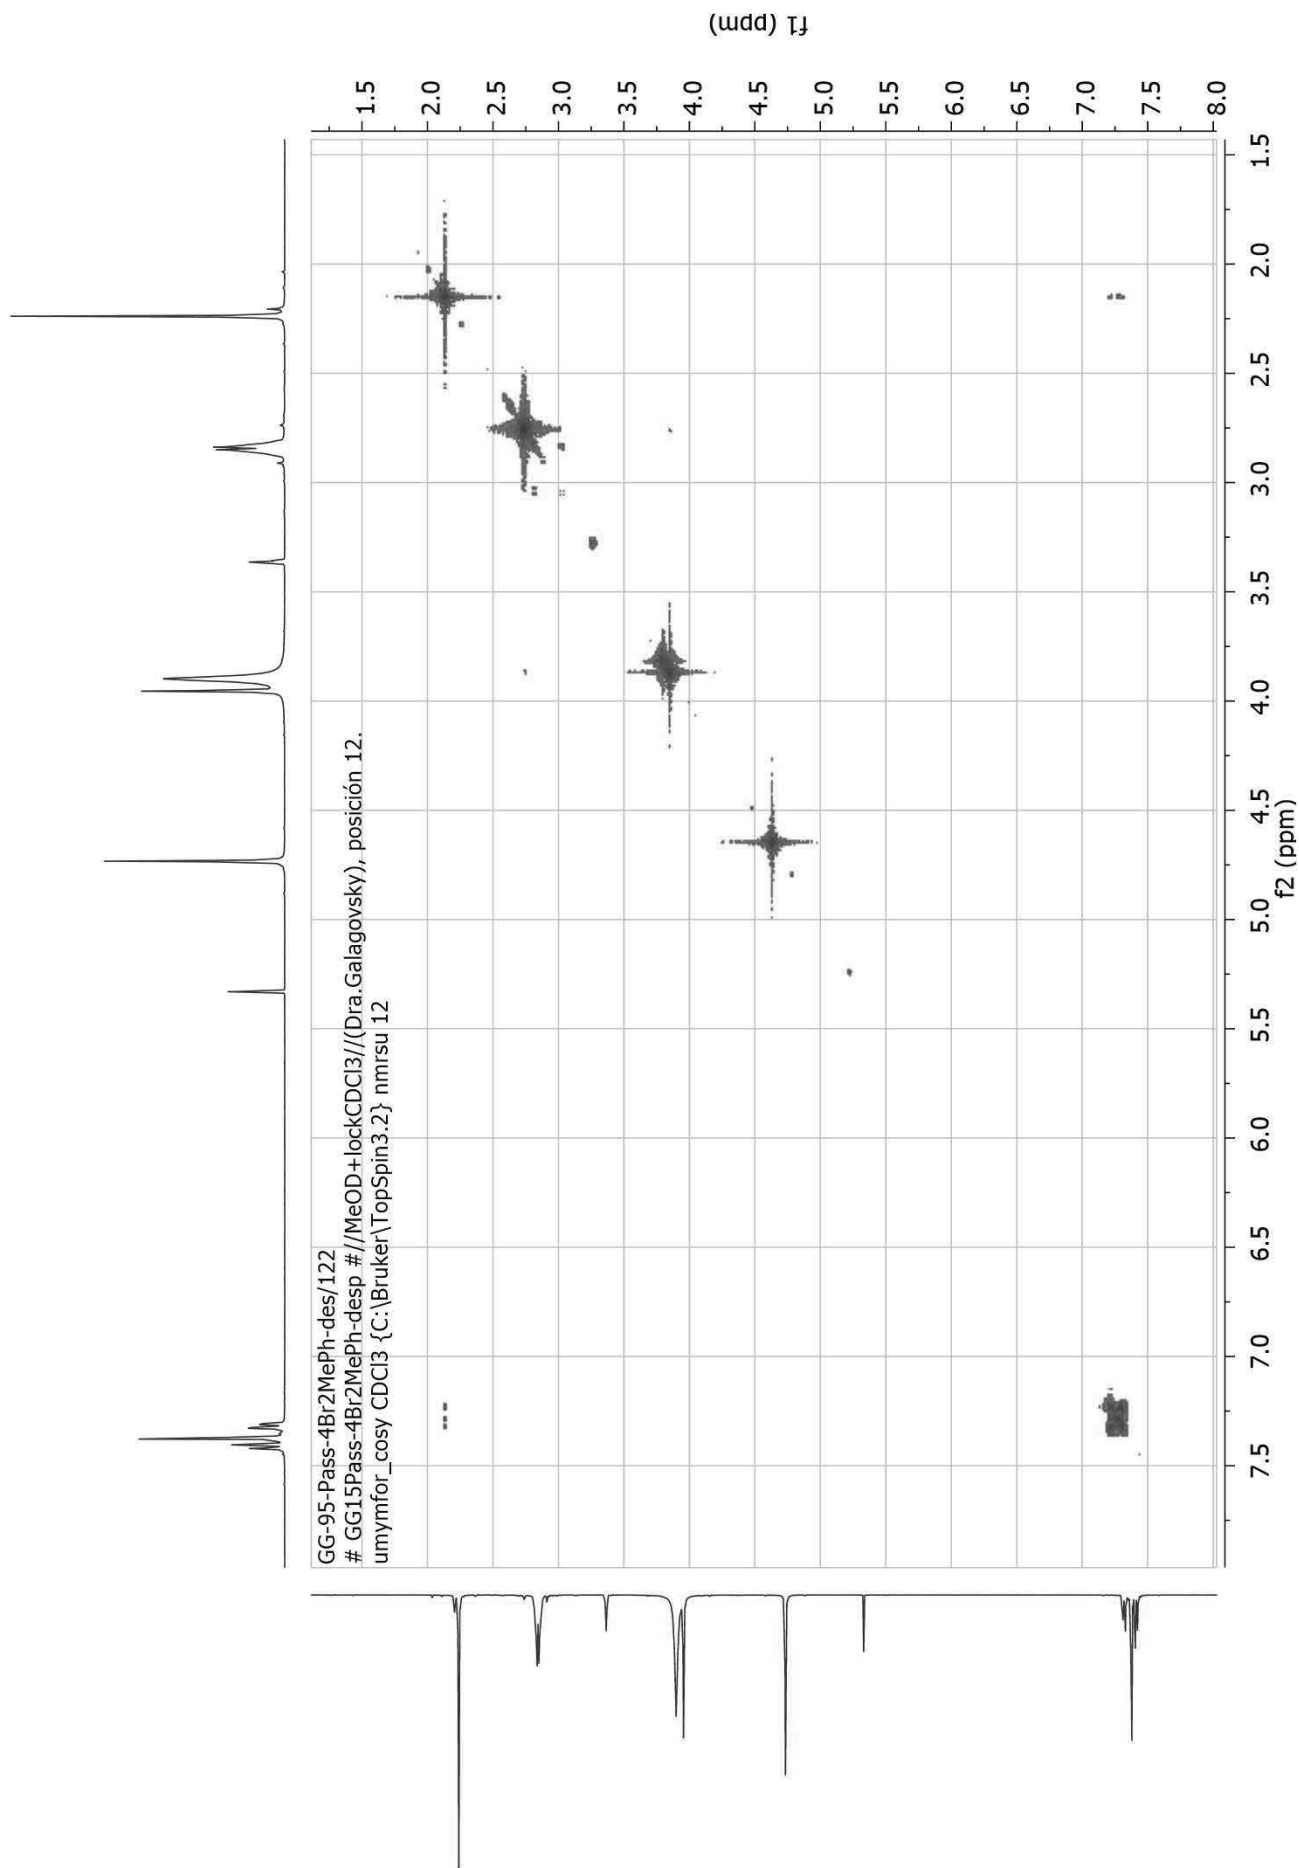

HMBC (500 MHz) for compound **1i**

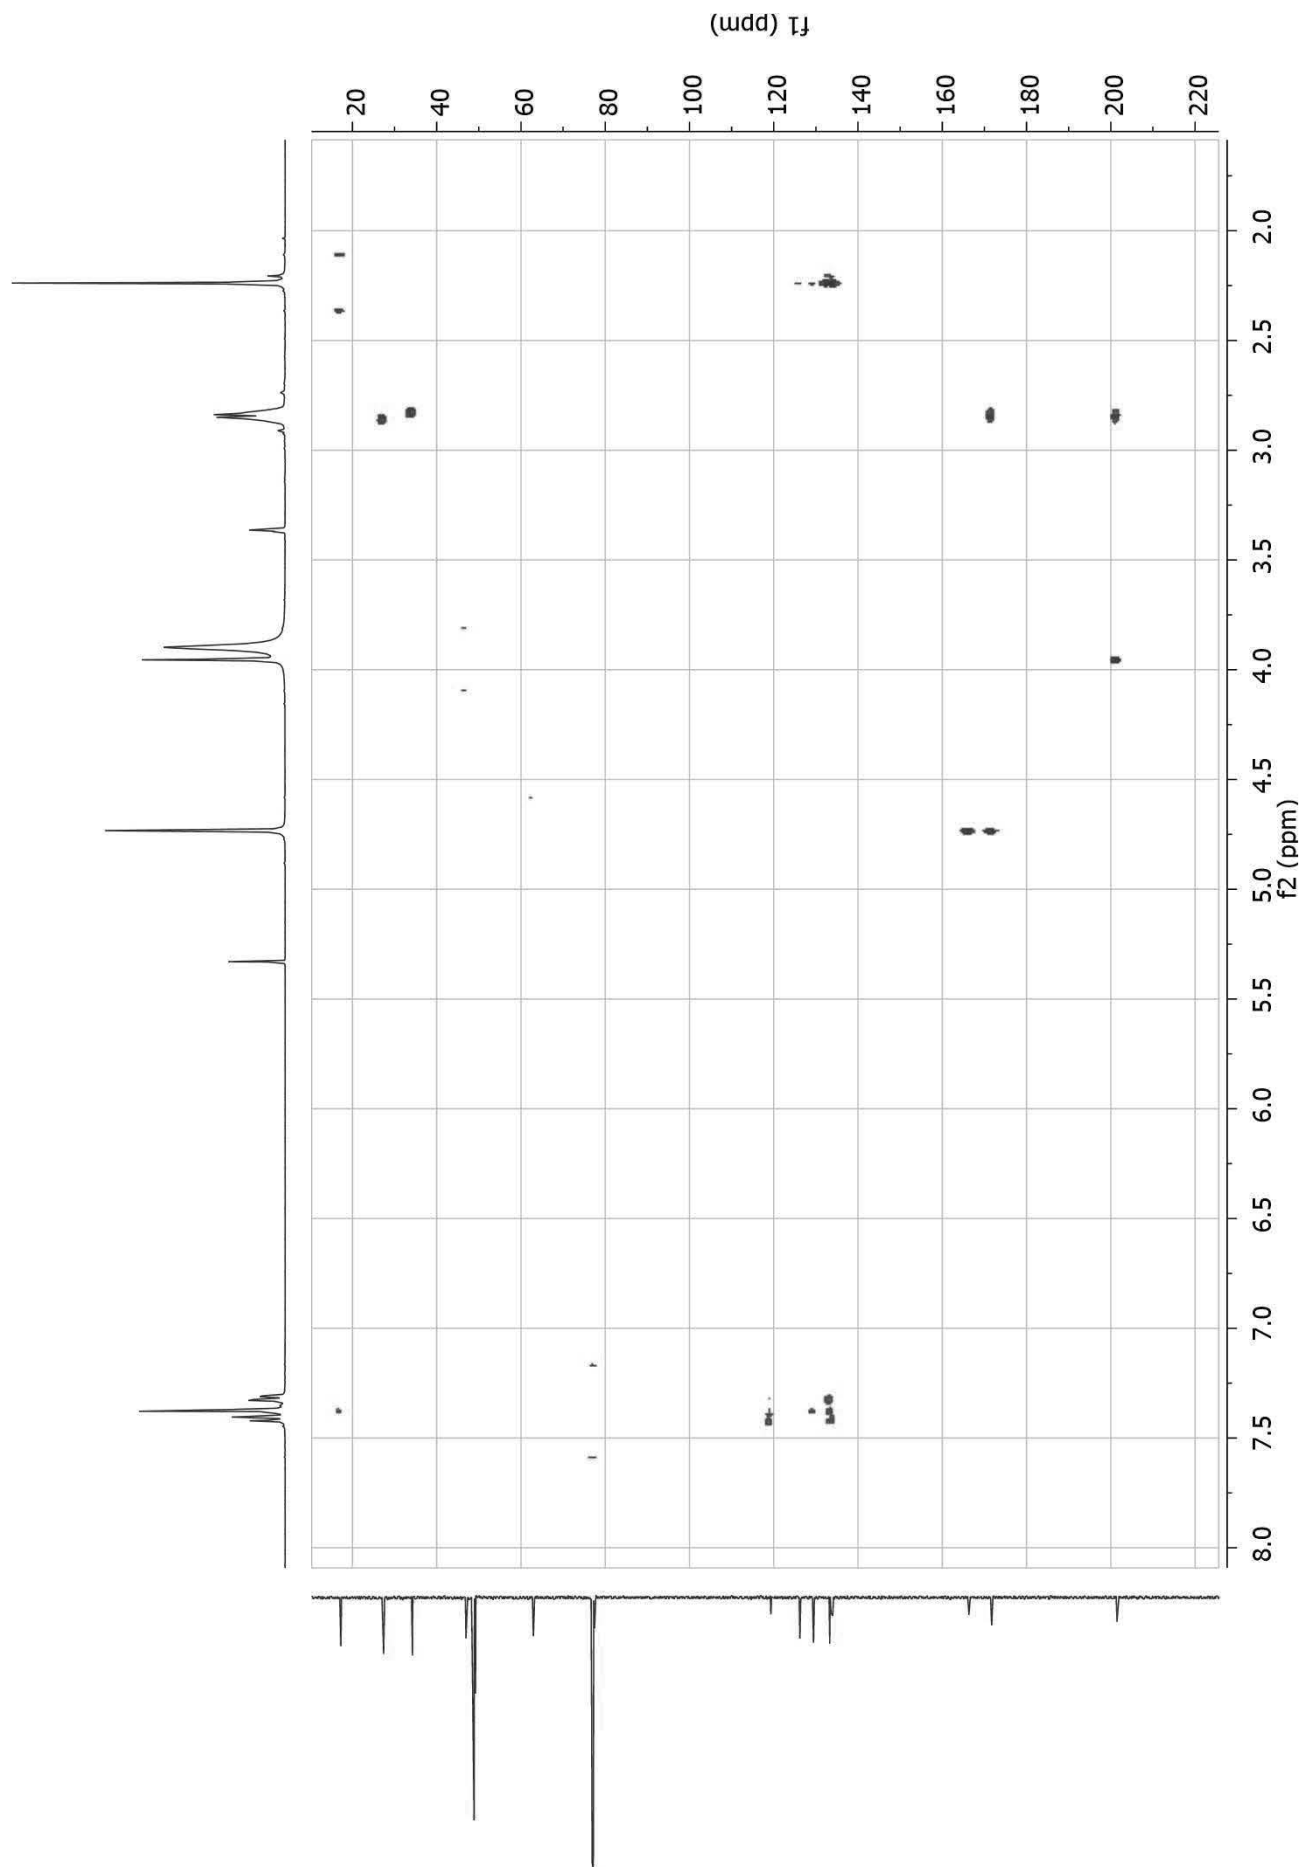

HSQC-DEPT (500 MHz) for compound **1i**

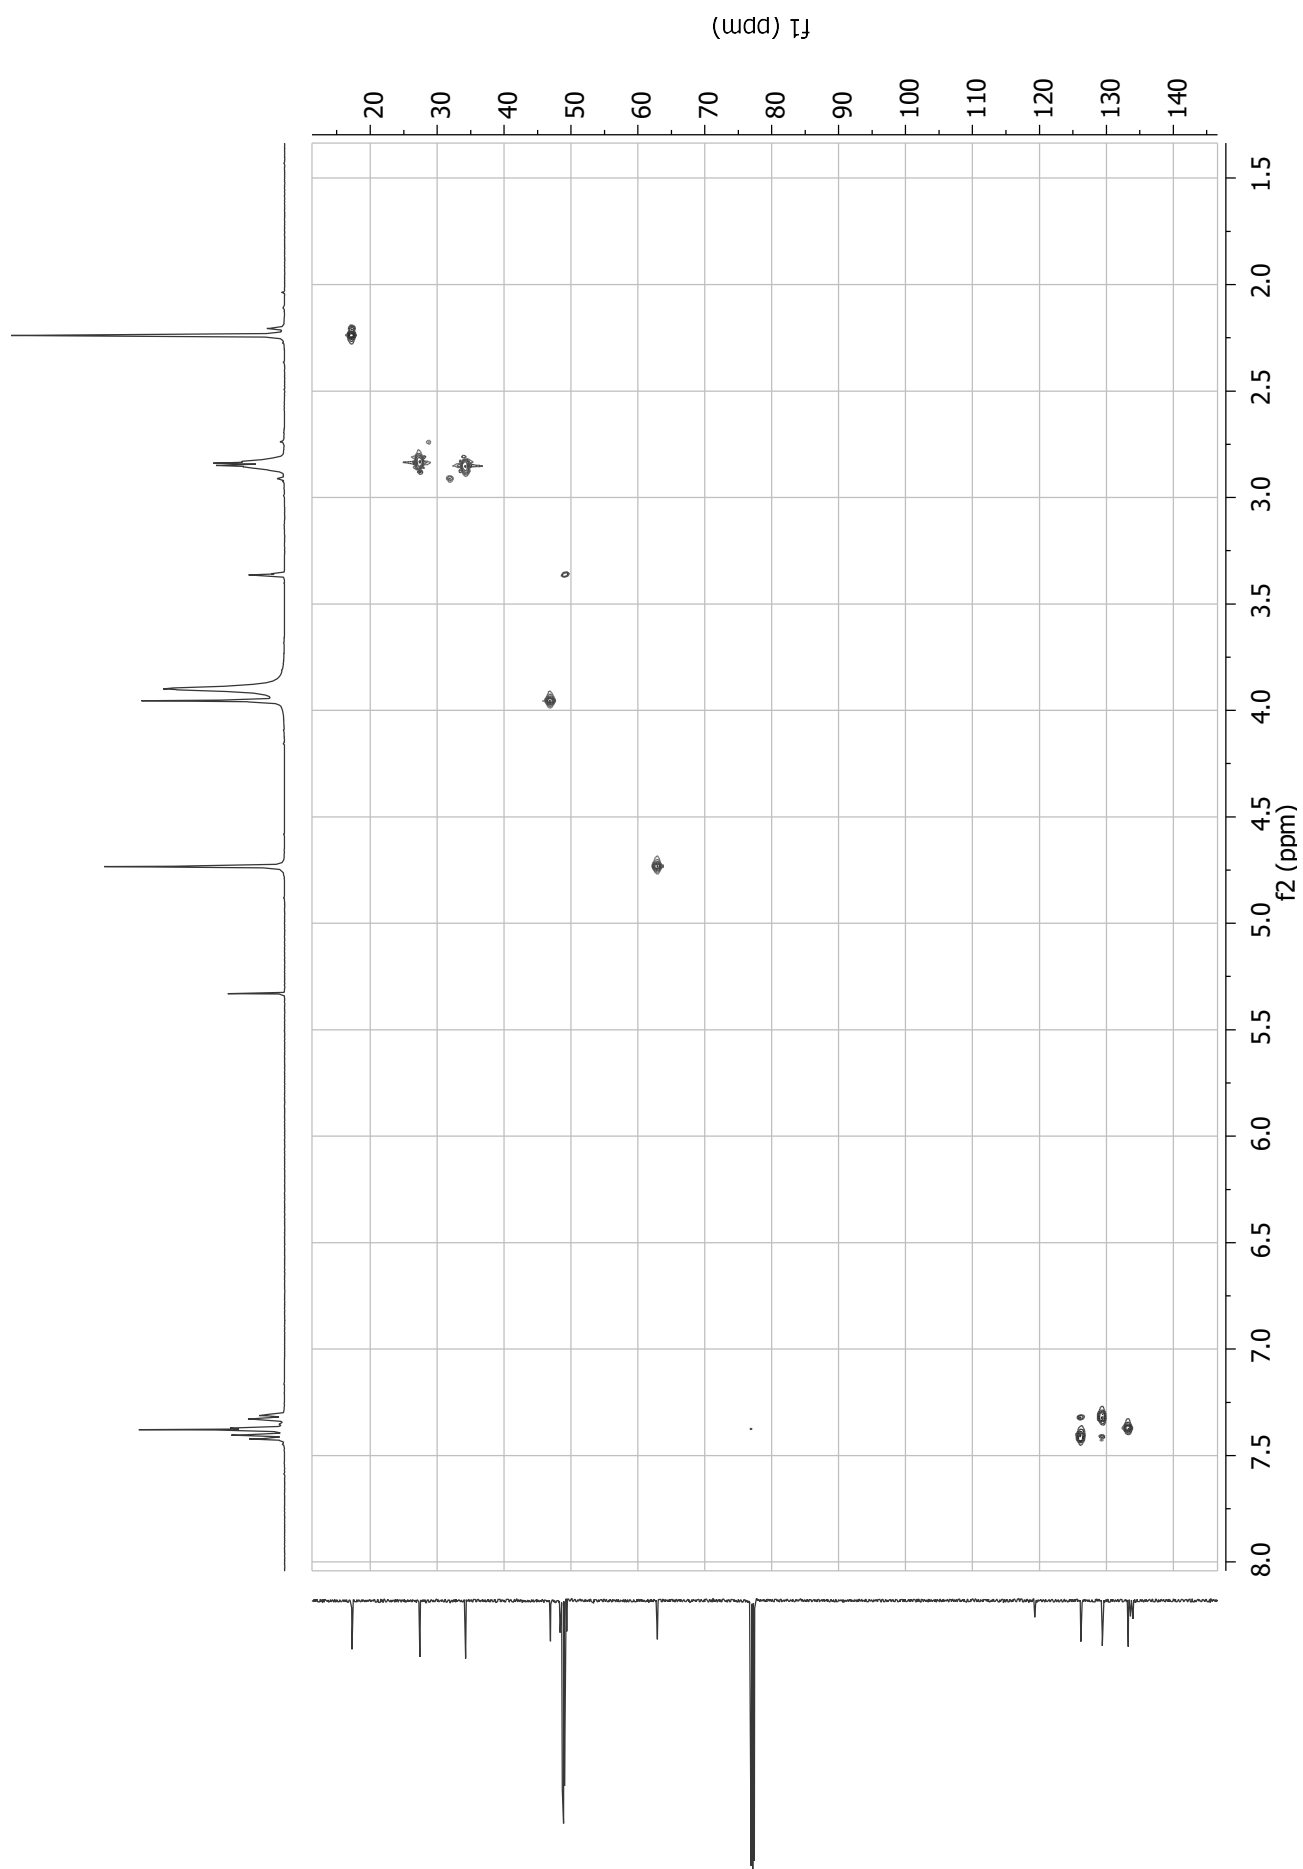

ESI MS/MS spectrum of  $m/z$   $[M+H]^+$  cation of compound **1i** (collision Energy 10 eV)

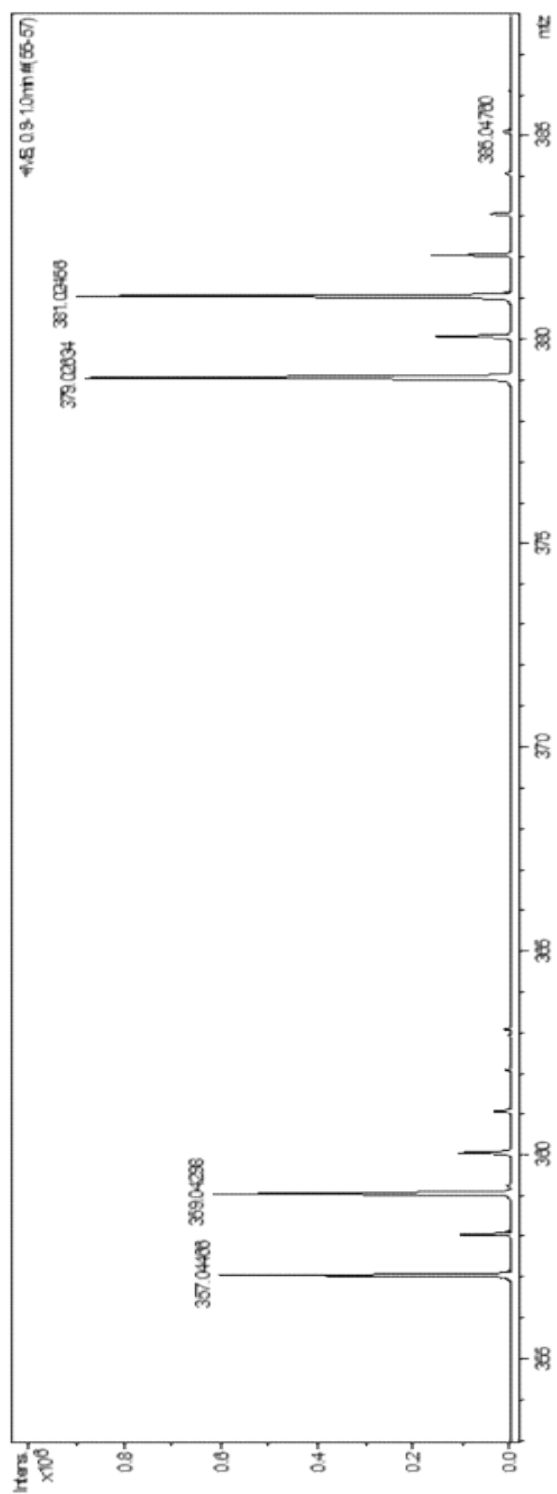

<sup>1</sup>H-NRM (500 MHz) for compound 2-oxo-2-(pentadecylamino)ethyl-5-aminolevulinatate (**1j**)

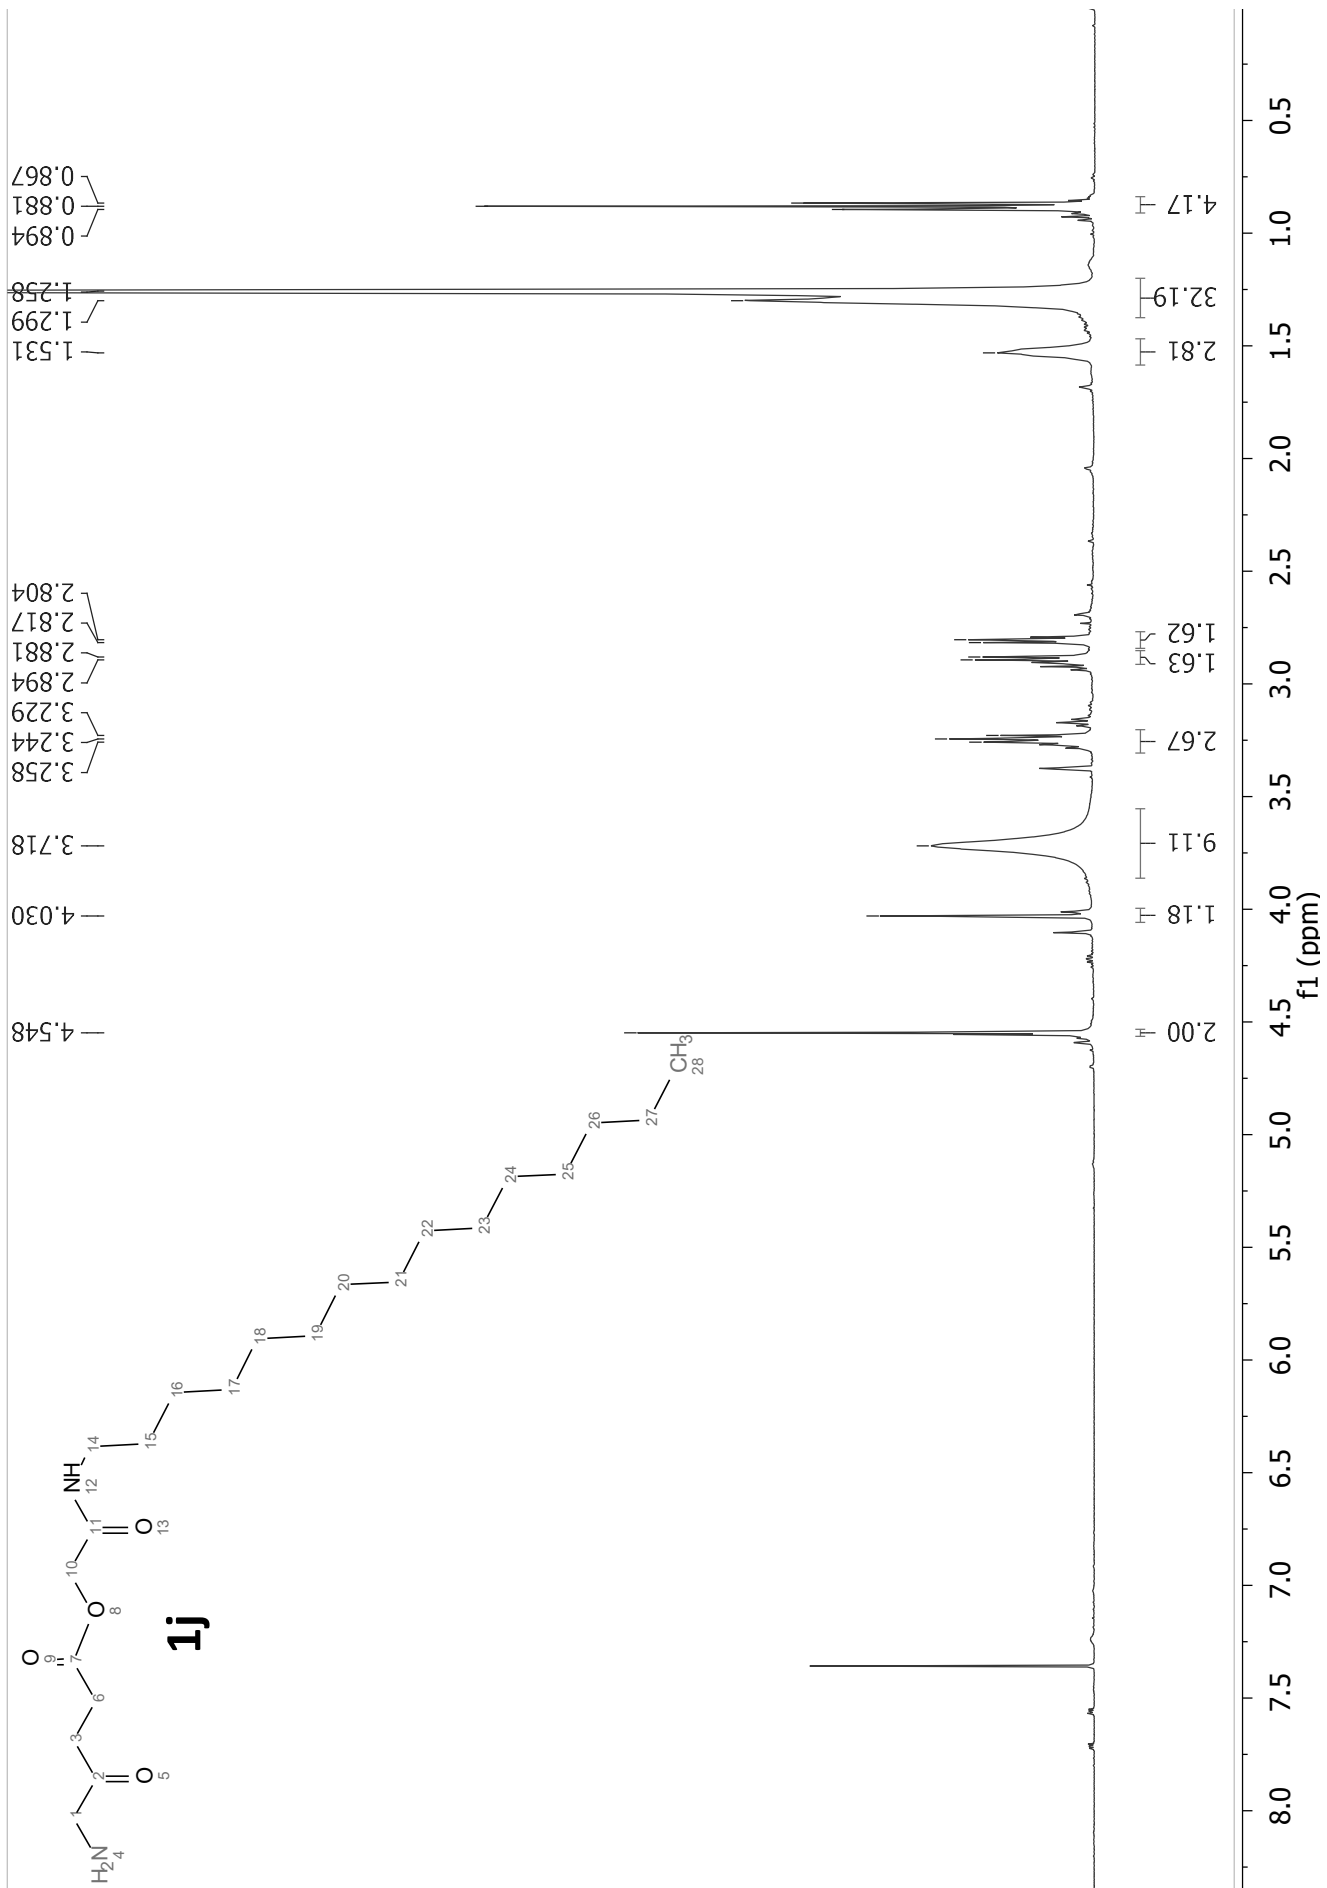

<sup>13</sup>C-NRM (125,7 MHz) for compound **1j**

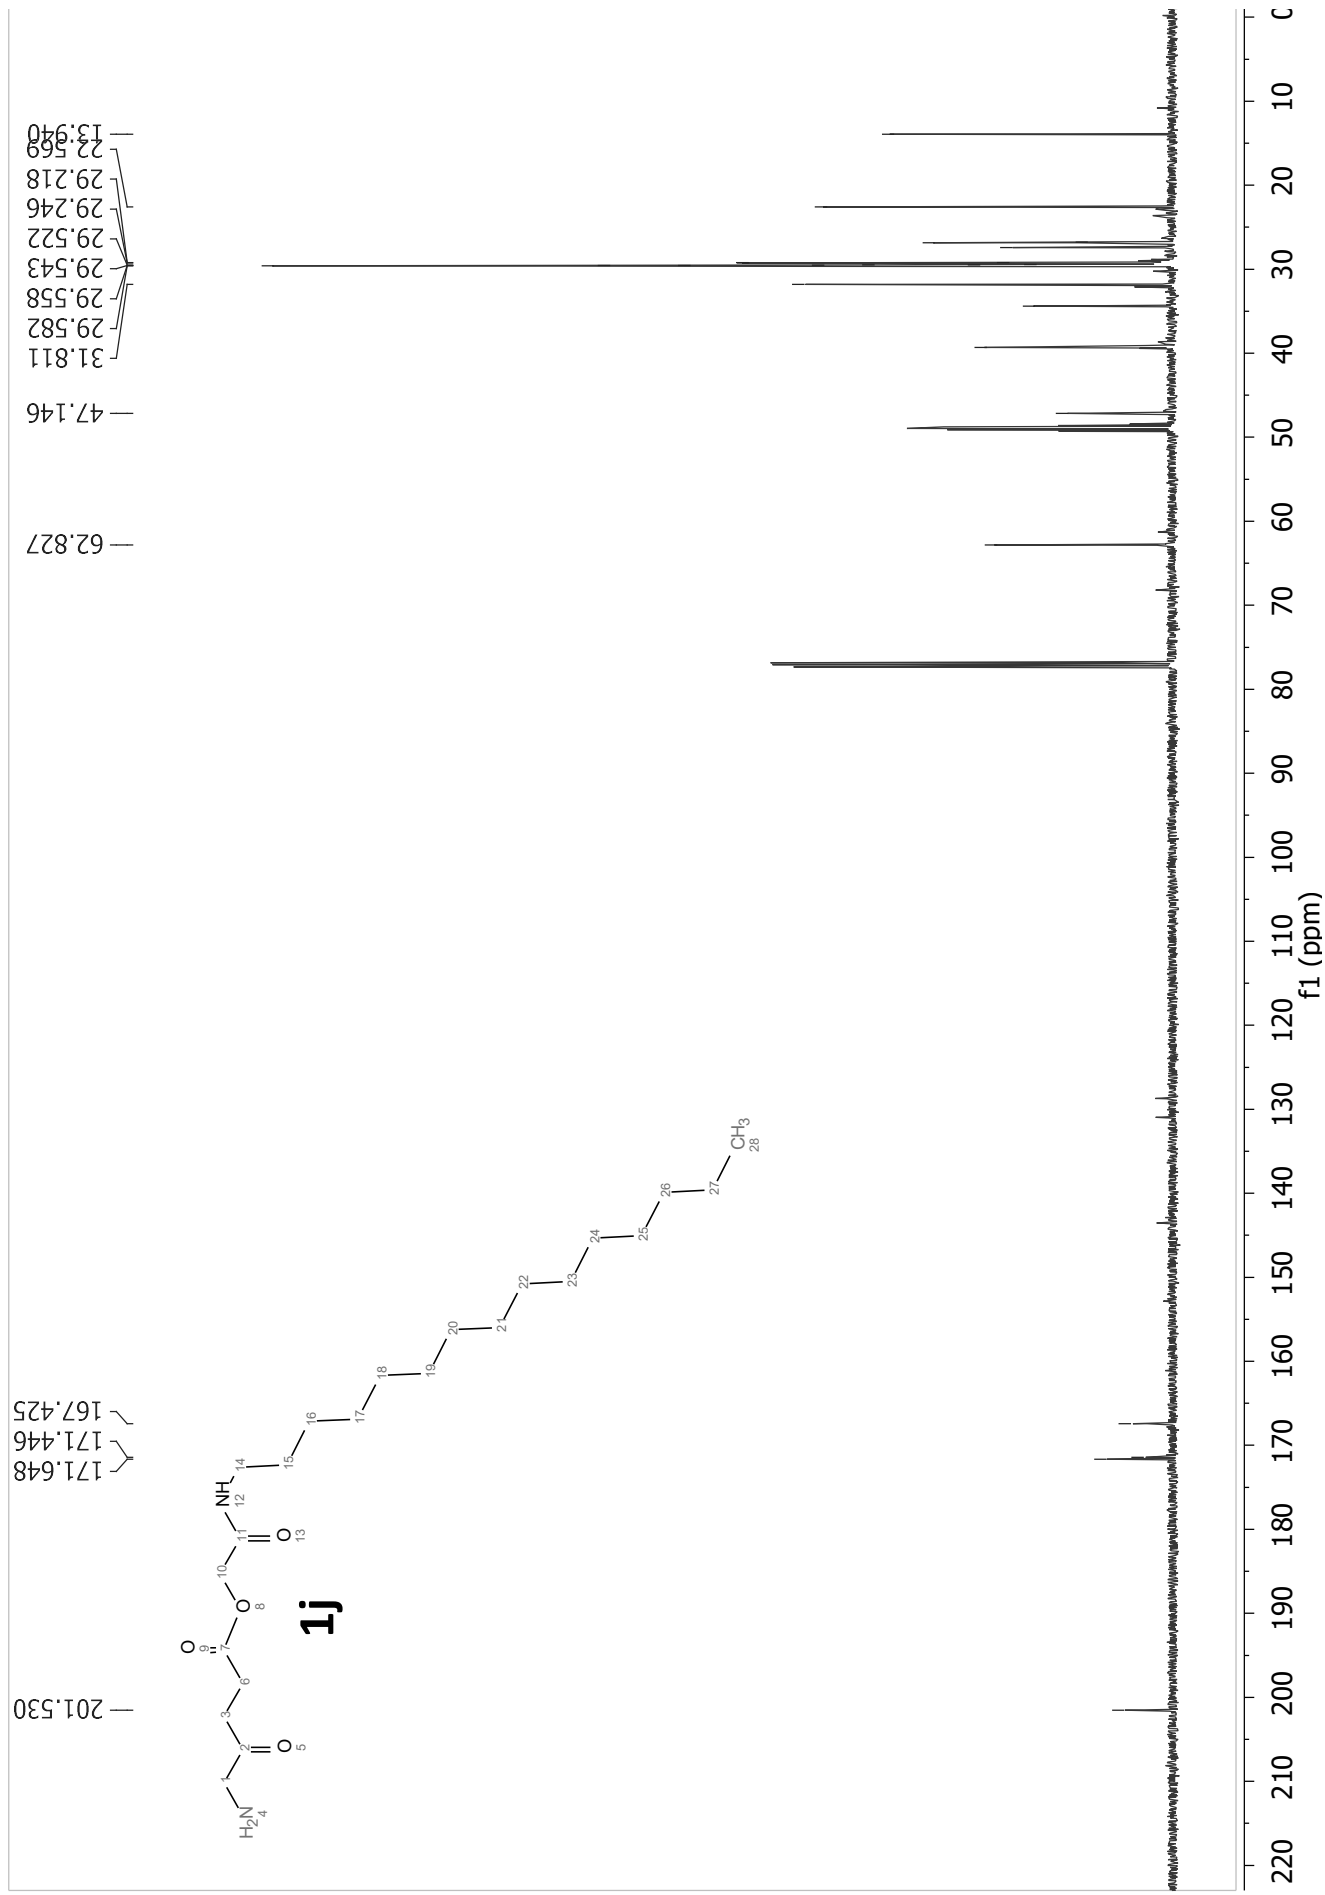

ESI MS/MS spectrum of m/z ([M+H]<sup>+</sup> cation of compound **1j** (collision Energy 10 eV)

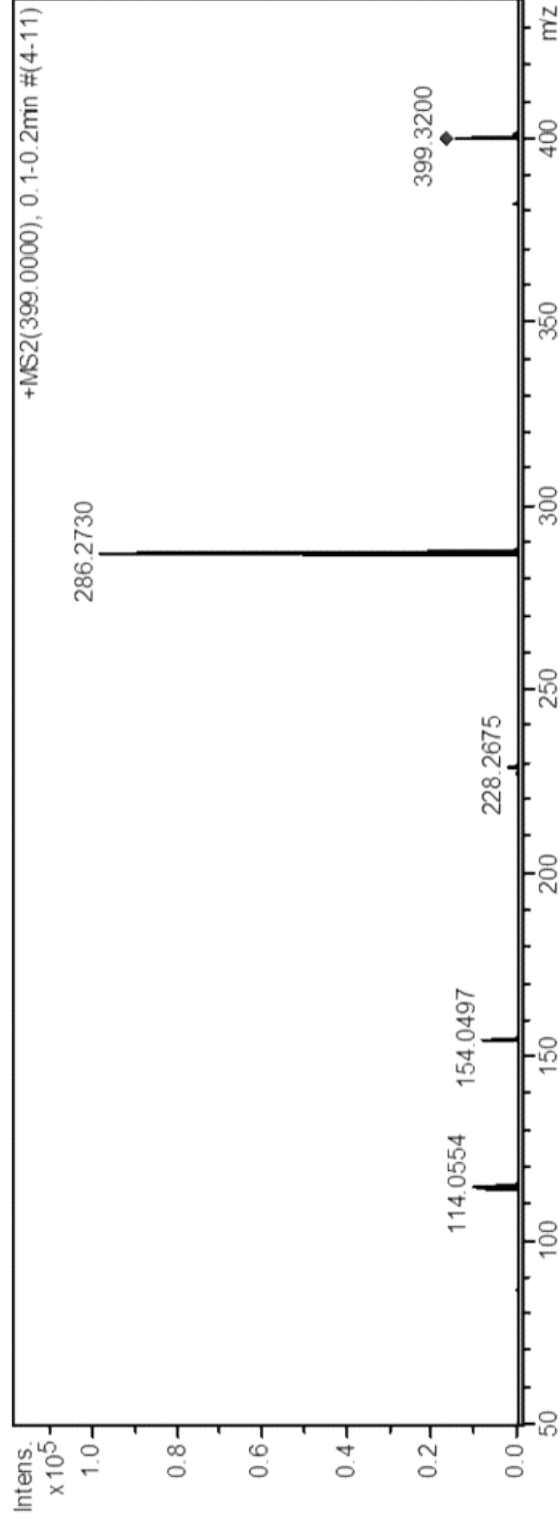

| Meas. m/z | Formula                                          | m/z      | err [ppm] | rdb  | N-Rule | e <sup>-</sup> Conf | Assignac.                     |
|-----------|--------------------------------------------------|----------|-----------|------|--------|---------------------|-------------------------------|
| 114.0554  | C <sub>5</sub> H <sub>8</sub> N <sub>2</sub> O   | 114.0550 | -4.2      | 2.5  | ok     | even                | ruptura CO-O←                 |
| 154.0497  | C <sub>7</sub> H <sub>8</sub> N <sub>3</sub> O   | 154.0499 | 0.9       | 4.5  | ok     | even                | X                             |
| 228.2675  | C <sub>15</sub> H <sub>34</sub> N                | 228.2686 | 4.8       | -0.5 | ok     | even                | RNH <sub>3</sub> <sup>+</sup> |
| 286.2730  | C <sub>17</sub> H <sub>36</sub> N <sub>2</sub> O | 286.2741 | 3.5       | 0.5  | ok     | even                | ruptura CO-O→                 |
| 399.3200  | C <sub>22</sub> H <sub>43</sub> N <sub>2</sub> O | 399.3217 | 4.2       | 2.5  | ok     | even                | [M+H] <sup>+</sup>            |



<sup>1</sup>H-NRM (500 MHz) for compound 2-(2-tolylamino)-2-oxoethyl-5-aminolevulinate (**1k**)

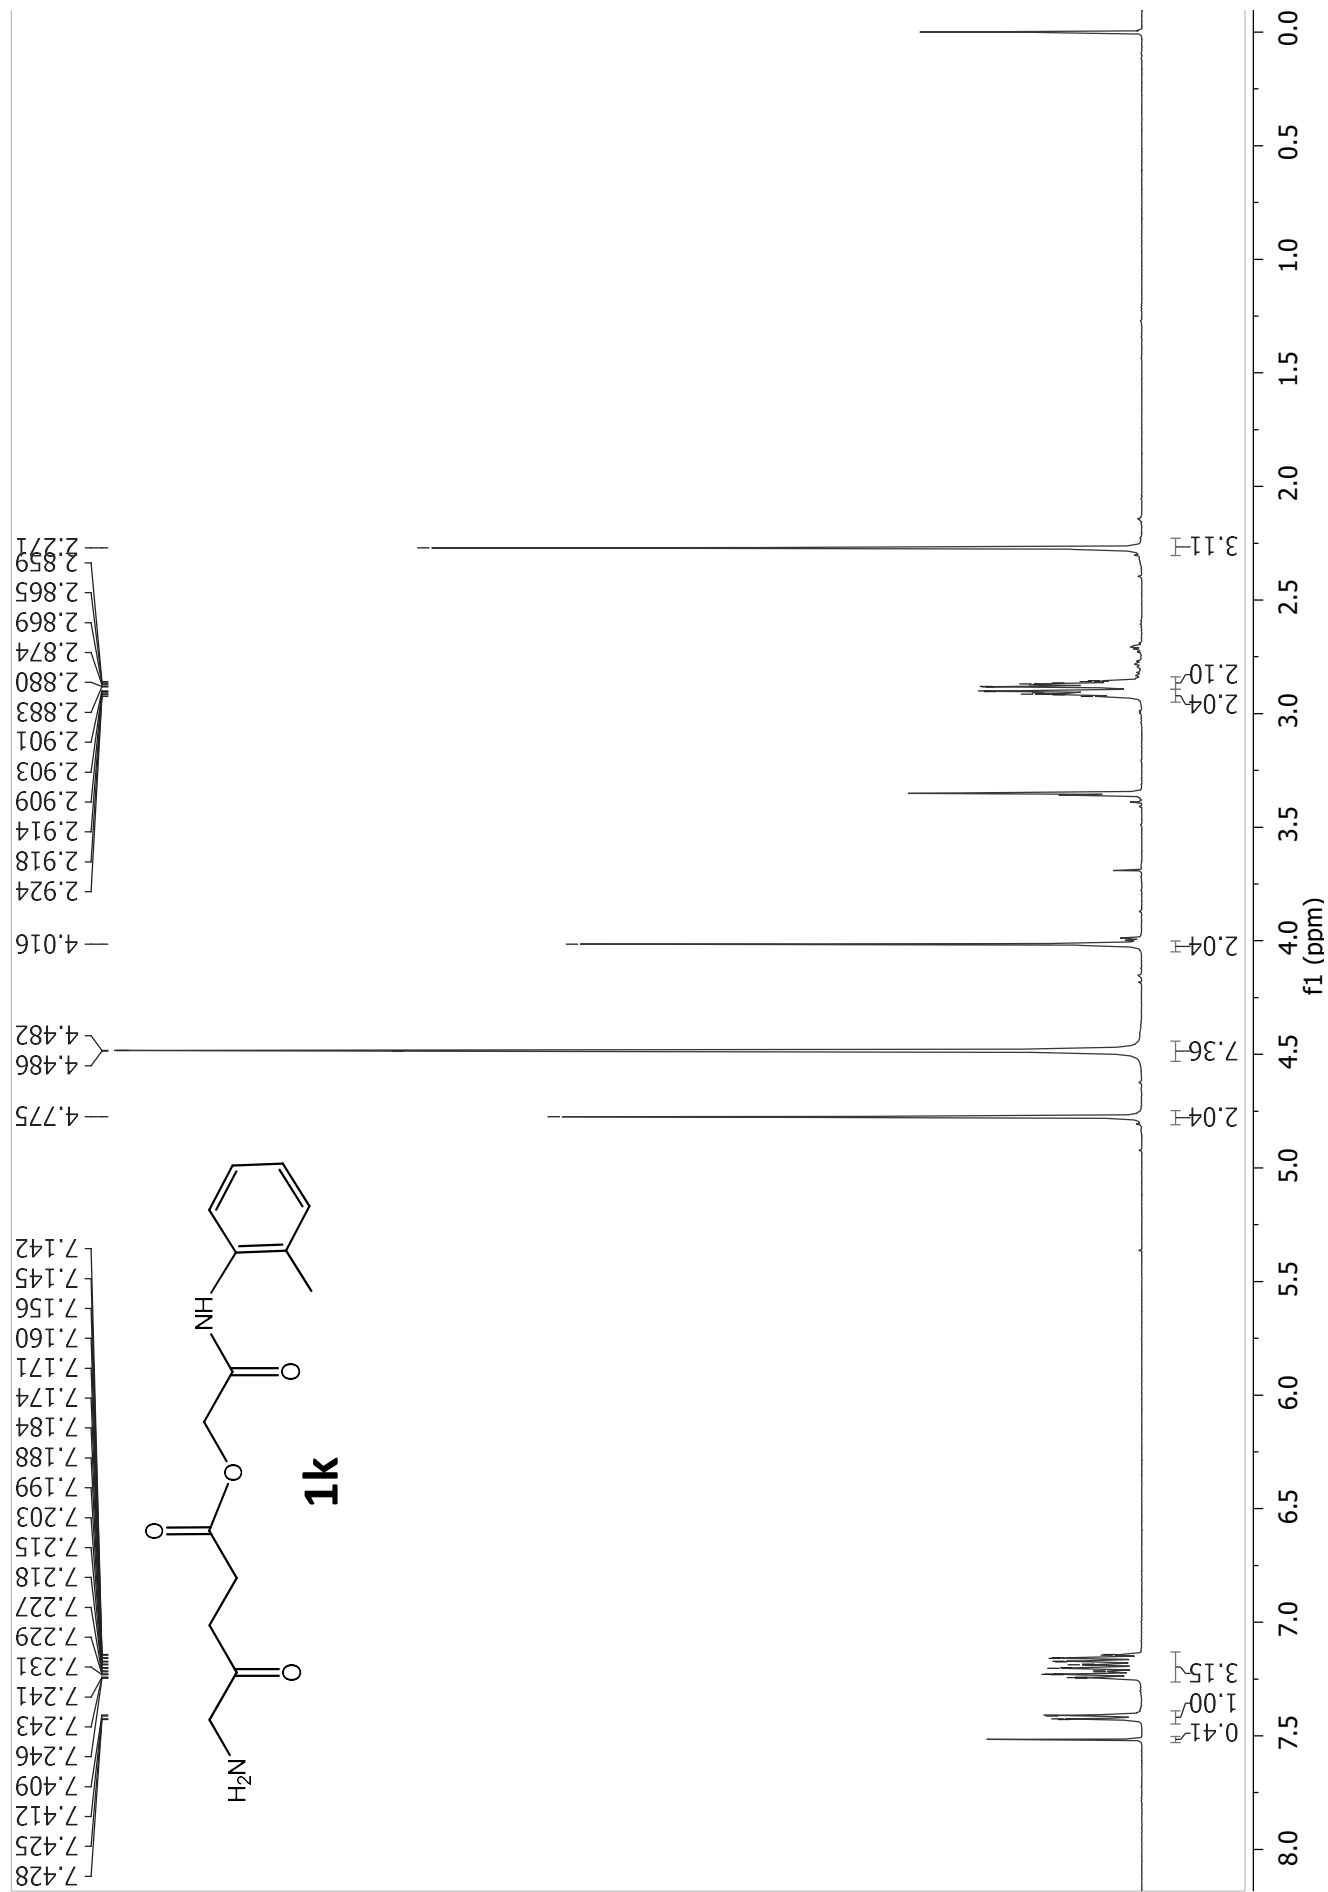

<sup>13</sup>C-NRM (125,7 MHz) for compound **1k**

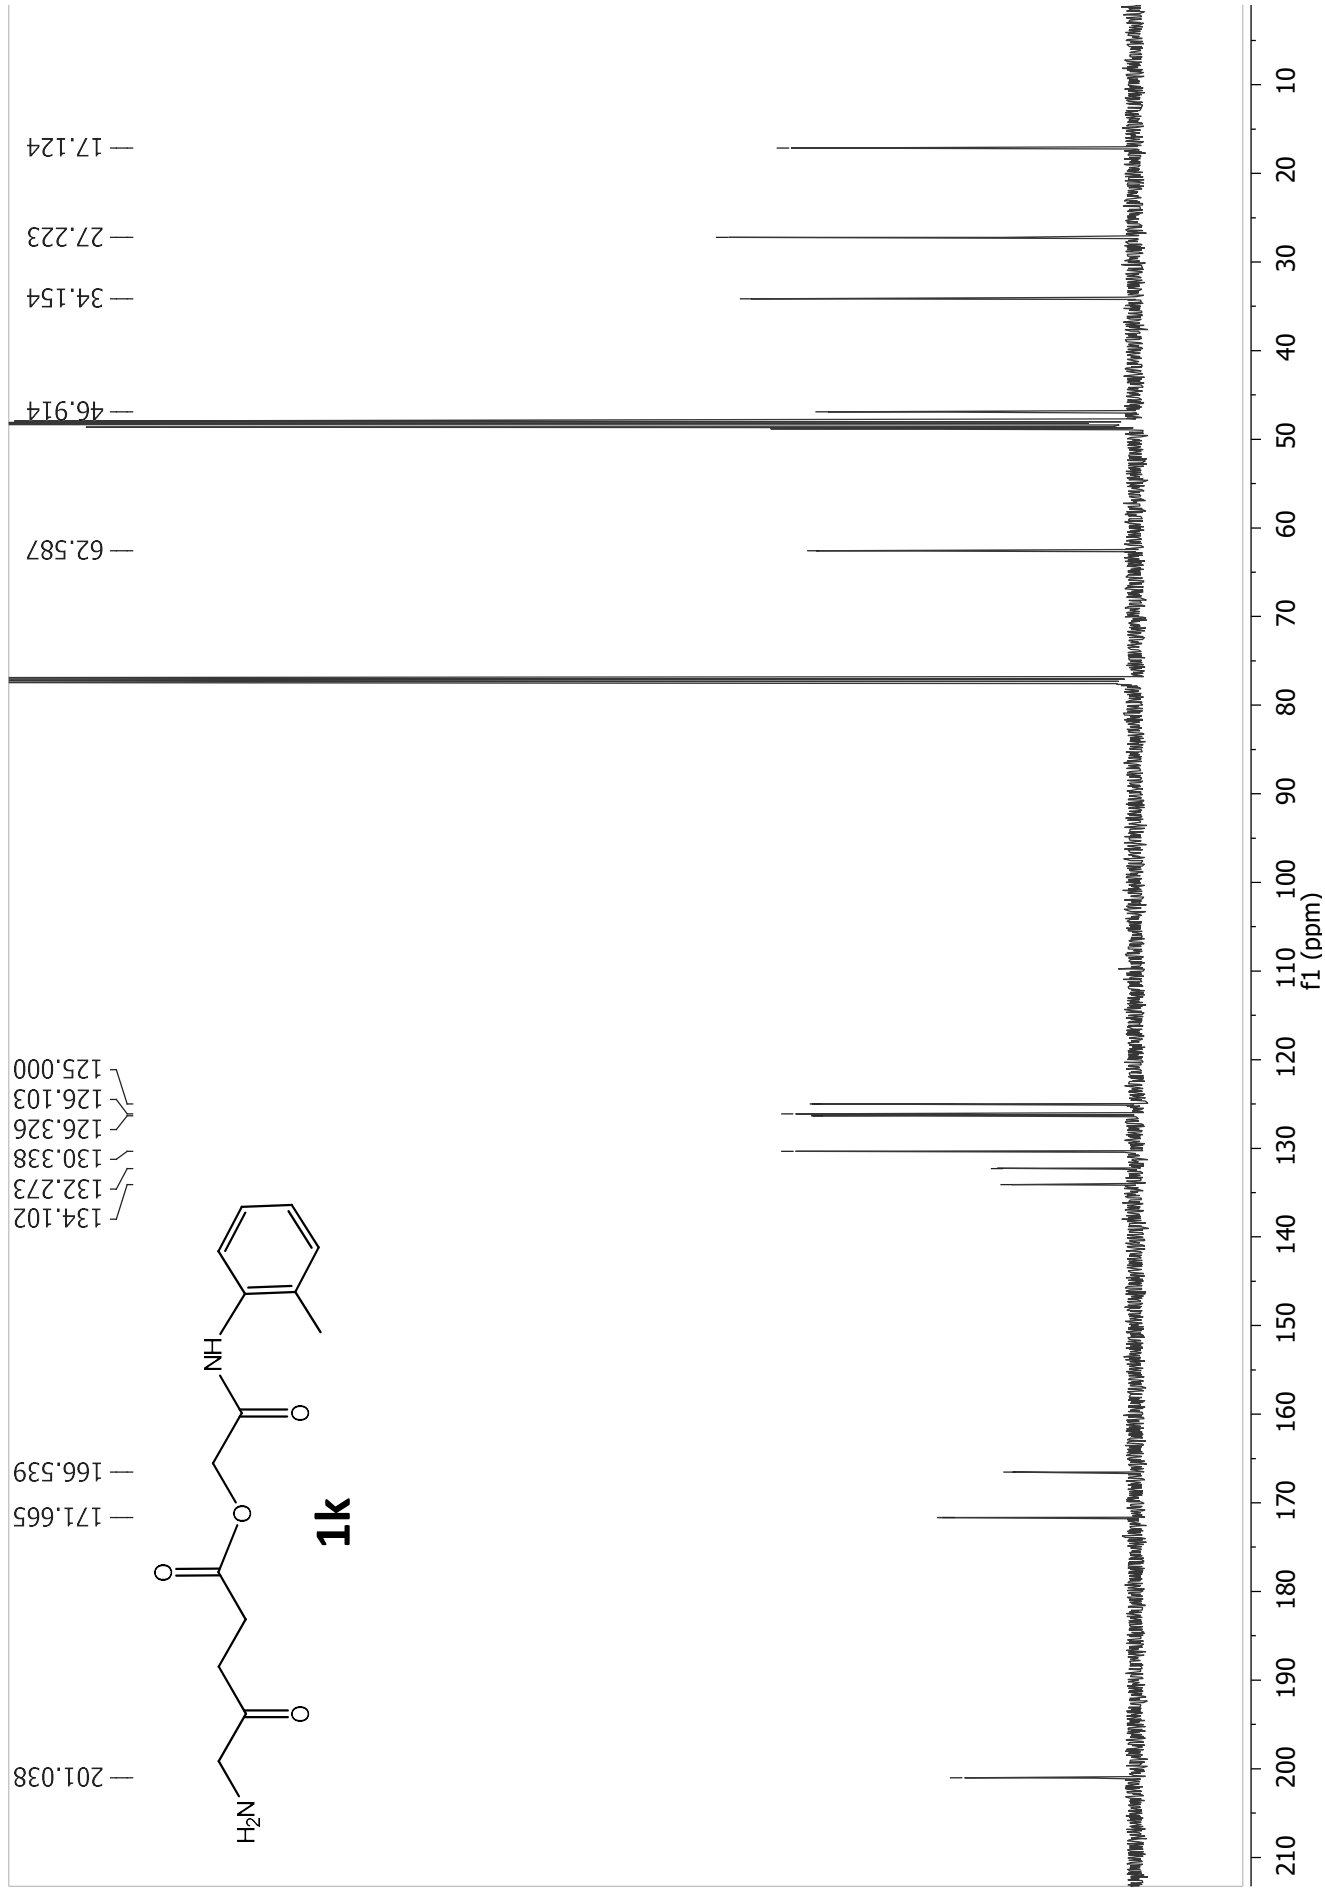

ESI MS/MS spectrum of m/z ([M+H]<sup>+</sup> cation of compound **1k** (collision Energy 10 eV)

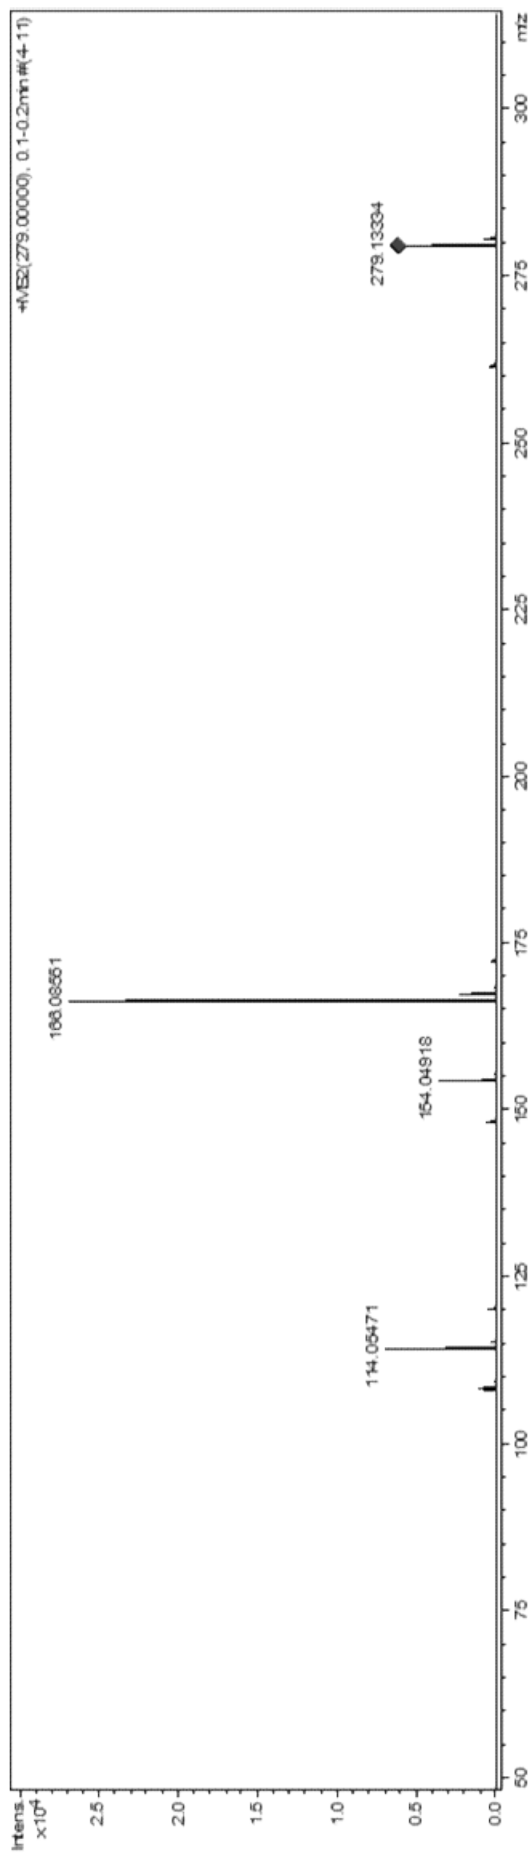

| Meas. m/z | Formula           | m/z       | err [ppm] | e <sup>-</sup> Conf N-Rule | mSigma  |
|-----------|-------------------|-----------|-----------|----------------------------|---------|
| 108.08049 | C 7 H 10 N        | 108.08078 | 2.6       | even                       | ok 12.6 |
| 114.05471 | C 5 H 8 N O 2     | 114.05495 | 2.1       | even                       | ok 4.1  |
| 148.07567 | C 9 H 10 N O      | 148.07569 | 0.2       | even                       | ok 58.4 |
| 154.04918 | C 7 H 8 N O 3     | 154.04987 | 4.5       | even                       | ok 5.5  |
| 166.08551 | C 9 H 12 N O 2    | 166.08626 | 4.5       | even                       | ok 6.5  |
| 261.12335 | C 14 H 17 N 2 O 3 | 261.12337 | 0.1       | even                       | ok 92.3 |
| 279.13334 | C 14 H 19 N 2 O 4 | 279.13393 | 2.1       | even                       | ok 13.0 |
